# Supplementary material for: A subcellular map of the human kinome
Source: eLife. 2021 May 14;10:e64943. doi: 10.7554/eLife.64943 (PMC8175086; doi:10.7554/eLife.64943)
Supplement: Figure 1—source data 1. [file elife-64943-fig1-data1.xlsx]

## Sheet: Raw Data Figure 1
A	family	total	present	absent		B	species	number		tag	number		Tag position	number
	AGC	63	57	6			human	441		HA-Flag	216		N-tag	254
	CAMK	74	63	11			mouse	20		Flag	217		C-tag	210
	CK1	12	10	2			rat	3		HA	16
	CMGC	64	61	3						Myc	11
	NDK	9	8	1						GFP	4
	PKL	6	6	0
	RGC	5	3	2		C	Expression level	number
	STE	47	40	7			high	98
	TKL	43	40	3			median	99
	TK	90	77	13			low	56
	Atypical	44	30	14			none	12
	Other	81	69	12
E	family	C	N	PM	MI	ER	GL	CS and CT	V	AG	multi
	Total	229	75	47	11	16	17	4	15	3	39

## Sheet: Raw data figure supplement 1
B	family	N-tag	C-tag		D	family	C	N	PM	MI	ER	GL	CS and CT	V	AG	multi	Total
	AGC	32	25			Total	229	75	47	11	16	17	4	15	3	39	456
	CAMK	35	28			AGC	28	2	12	1	1	2	0	5	0	6	57
	CK1	5	5			CAMK	29	19	7	0	0	0	1	0	1	6	63
	CMGC	35	26			CK1	5	2	2	0	1	0	0	0	0	0	10
	NDK	2	6			CMGC	34	23	2	0	0	0	0	0	0	0	59
	PKL	5	1			NDK	5	1	0	2	0	0	0	0	0	0	8
	RGC	2	1			PKL	0	0	0	0	1	5	0	0	0	0	6
	STE	24	16			RGC	1	0	0	0	2	0	0	0	0	0	3
	TKL	23	17			STE	31	1	1	0	1	0	1	2	0	3	40
	TK	26	51			TKL	23	1	3	0	4	2	0	1	0	5	39
	Atypical	19	11			TK	25	3	18	0	2	4	1	4	1	17	75
	Other	46	23			Atypical	10	10	1	7	0	0	0	0	0	1	29
						Other	38	13	1	1	4	4	1	3	1	1	67
