# Supplementary material for: A subcellular map of the human kinome
Source: eLife. 2021 May 14;10:e64943. doi: 10.7554/eLife.64943 (PMC8175086; doi:10.7554/eLife.64943)
Supplement: Figure 2—source data 1. [file elife-64943-fig2-data1.xlsx]

## Sheet: Raw data Figure 2
C	revised KA-COMP matched											G
	localization	C	N	PM	MI	ER	GL	CS&CT	V	AG			revised KA-COMP different	85
	number	142	52	33	9	4	7	3	2	0			revised KA confirm HPA	20
													not in HPA	21
	revised KA-COMP unmatched
	localization	C	N	PM	MI	ER	GL	CS&CT	V	AG			revised KA-HPA different	172
	number	29	7	17	4	10	6	0	10	2			revised KA confirm COMP	90
													not in COMP	38
E	revised KA-HPA matched
	localization	C	N	PM	MI	ER	GL	CS&CT	V	AG
	number	84	53	12	8	1	3	1	1	0
	revised KA-HPA unmatched
	localization	C	N	PM	MI	ER	GL	CS&CT	V	AG
	number	95	15	28	6	8	9	1	8	2
H
		C	N	PM	MI	ER	GL	CT&CS	V	AG
	SPORT predicted	31	8	1	2	3	0	0	1	0
	SPORT not predicted	5	0	19	3	9	8	0	10	3
		C	N	PM	MI	ER	GL	CT&CS	V	AG
	YLoc predicted	30	1	0	2	0	1	0	1	0
	Yloc not predicted	6	7	20	3	12	7	0	10	3

## Sheet: Raw data figure supplement 1
A
	KA-COMP matched
	localization	C	N	PM	MI	ER	GL	CS&CT	V	AG
	number	141	52	26	6	4	7	3	1	0
	KA-COMP unmatched
	localization	C	N	PM	MI	ER	GL	CS&CT	V	AG
	number	42	7	13	2	11	8	0	12	2
D
	revised KA-HPA sup enh matched
	localization	C	N	PM	MI	ER	GL	CS&CT	V	AG
	number	44	38	10	8	1	2	1	1	0
	revised KA-HPA sup enh unmatched
	localization	C	N	PM	MI	ER	GL	CS&CT	V	AG
	number	45	5	13	1	2	2	1	5	0
