# Supplementary material for: A subcellular map of the human kinome
Source: eLife. 2021 May 14;10:e64943. doi: 10.7554/eLife.64943 (PMC8175086; doi:10.7554/eLife.64943)
Supplement: Figure 3—source data 2. [file elife-64943-fig3-data2.xlsx]

## Sheet: Raw data Figure 3
I
		H460 Vec				H460 LBK1
		Count 1	Count 2	Count 3		Count 1	Count 2	Count 3
	Tubular	58	66	61		10	10	16
	Cytoplasmic	42	34	39		90	90	84
