# Supplementary material for: A subcellular map of the human kinome
Source: eLife. 2021 May 14;10:e64943. doi: 10.7554/eLife.64943 (PMC8175086; doi:10.7554/eLife.64943)
Supplement: Figure 5—figure supplement 1—source data 2. [file elife-64943-fig5-figsupp1-data2.xlsx]

## Sheet: Raw data figure supplement 1
D							I
	Flag-MOK	Count 1	Count 2	Count 3				siNT	0.962794
	Mitochondria	0.70297	0.693878	0.790909				siNT	1.03867
								siMOK#1	0.373958
								siMOK#1	0.377301
	MOK-Myc	Count 1	Count 2	Count 3				siMOK#2	0.48541
	Mitochondria	1	1	1				siMOK#2	0.524211
	Flag -TNK1	Count 1	Count 2	Count 3
	Mitochondria	0.127273	0.18	0.211538
	TNK1-Myc	Count 1	Count 2	Count 3
	Mitochondria	0.663462	0.587629	0.5
