# Supplementary material for: A subcellular map of the human kinome
Source: eLife. 2021 May 14;10:e64943. doi: 10.7554/eLife.64943 (PMC8175086; doi:10.7554/eLife.64943)
Supplement: Figure 6—source data 2. [file elife-64943-fig6-data2.xlsx]

## Sheet: Raw data Figure 6
E
		MOK1 FL
		Count 1	Count 2	Count 3
	Non-mitochondria	67	66	54
	Mitochondria	33	34	46
		MOK1 KD
		Count 1	Count 2	Count 3
	Non-mitochondria	78	84	86
	Mitochondria	22	16	14
		MOK2 FL
		Count 1	Count 2	Count 3
	Non-mitochondria	0	0	0
	Mitochondria	100	100	100
		MOK2 KD
		Count 1	Count 2	Count 3
	Non-mitochondria	0	0	0
	Mitochondria	100	100	100

## Sheet: Raw data figure supplement 1
E
	shNT	0.967043		shNT	1.03439		shNT	1.03848		shNT	1.01793		shNT	1.04147		shNT	0.845235
	shNT	1.00056		shNT	0.996021		shNT	0.962942		shNT	0.980602		shNT	0.960075		shNT	1.18363
	shTOM20	0.0484538		shTOM70	0.026279		shTIM23	0.0529088		shTIM17A	0.0905831		shTIM50	0.14497		shTIM9	0.155254
	shTOM20	0.0472473		shTOM70	0.025269		shTIM23	0.0459782		shTIM17A	0.0753758		shTIM50	0.133986		shTIM9	0.174063
	shNT	0.973735		shNT	1.03783		shNT	1.03245		shNT	1.0401		shNT	0.980122
	shNT	1.02444		shNT	0.964062		shNT	0.968915		shNT	0.955585		shNT	1.01837
	shTIM22	0.111284		shHSPA9	0.545017		shOXA1L	0.113026		shBCS1L	0.243456		shMIA40	0.146573
	shTIM22	0.102554		shHSPA9	0.551038		shOXA1L	0.12712		shBCS1L	0.252242		shMIA40	0.11684
