# Supplementary material for: A subcellular map of the human kinome
Source: eLife. 2021 May 14;10:e64943. doi: 10.7554/eLife.64943 (PMC8175086; doi:10.7554/eLife.64943)
Supplement: Figure 7—figure supplement 1—source data 2. [file elife-64943-fig7-figsupp1-data2.xlsx]

## Sheet: Vec
Vec
Number	Protein name	Protein description	Protein Score
1	P35579	Myosin-9 OS=Homo sapiens GN=MYH9 PE=1 SV=4	1392
2	Q86YZ3	Hornerin OS=Homo sapiens GN=HRNR PE=1 SV=2	1008
3	Target protein	OS=Homo sapiens GN=MOK1 PE=1 SV=2	638
4	P14923	Junction plakoglobin OS=Homo sapiens GN=JUP PE=1 SV=3	546
5	P60709	Actin, cytoplasmic 1 OS=Homo sapiens GN=ACTB PE=1 SV=1	544
6	F5GWP8	Junction plakoglobin OS=Homo sapiens GN=JUP PE=2 SV=1	530
7	P52272	Heterogeneous nuclear ribonucleoprotein M OS=Homo sapiens GN=HNRNPM PE=1 SV=3	424
8	E9PKE3	Heat shock cognate 71 kDa protein OS=Homo sapiens GN=HSPA8 PE=2 SV=1	409
9	P10809	60 kDa heat shock protein, mitochondrial OS=Homo sapiens GN=HSPD1 PE=1 SV=2	396
10	Q5D862	Filaggrin-2 OS=Homo sapiens GN=FLG2 PE=1 SV=1	318
11	P15924	Desmoplakin OS=Homo sapiens GN=DSP PE=1 SV=3	313
12	K7EM38	Actin, cytoplasmic 2, N-terminally processed (Fragment) OS=Homo sapiens GN=ACTG1 PE=3 SV=1	296
13	O15294	UDP-N-acetylglucosamine--peptide N-acetylglucosaminyltransferase 110 kDa subunit OS=Homo sapiens GN=OGT PE=1 SV=3	284
14	P08107	Heat shock 70 kDa protein 1A/1B OS=Homo sapiens GN=HSPA1A PE=1 SV=5	270
15	P42694	Probable helicase with zinc finger domain OS=Homo sapiens GN=HELZ PE=1 SV=2	257
16	Q6N021	Methylcytosine dioxygenase TET2 OS=Homo sapiens GN=TET2 PE=1 SV=3	237
17	Q5VTE0	Putative elongation factor 1-alpha-like 3 OS=Homo sapiens GN=EEF1A1P5 PE=5 SV=1	236
18	P62805	Histone H4 OS=Homo sapiens GN=HIST1H4A PE=1 SV=2	224
19	P68363	Tubulin alpha-1B chain OS=Homo sapiens GN=TUBA1B PE=1 SV=1	211
20	F5H5D3	Tubulin alpha-1C chain OS=Homo sapiens GN=TUBA1C PE=2 SV=1	209
21	Q13835-2	Isoform 1 of Plakophilin-1 OS=Homo sapiens GN=PKP1	208
22	Q13753	Laminin subunit gamma-2 OS=Homo sapiens GN=LAMC2 PE=1 SV=2	201
23	E7ER76	MAPK/MAK/MRK overlapping kinase OS=Homo sapiens GN=MOK PE=2 SV=1	198
24	Q6P3W7	SCY1-like protein 2 OS=Homo sapiens GN=SCYL2 PE=1 SV=1	189
25	B4DR52	Histone H2B OS=Homo sapiens GN=HIST2H2BF PE=2 SV=1	167
26	G3V0I6	OTU domain containing 4, isoform CRA_f OS=Homo sapiens GN=OTUD4 PE=2 SV=1	162
27	J3KN86	40S ribosomal protein S3 OS=Homo sapiens GN=RPS3 PE=3 SV=1	155
28	Q8NFC6	Biorientation of chromosomes in cell division protein 1-like 1 OS=Homo sapiens GN=BOD1L1 PE=1 SV=2	150
29	A8MUB1	Tubulin alpha-4A chain OS=Homo sapiens GN=TUBA4A PE=2 SV=1	147
30	M0R210	40S ribosomal protein S16 OS=Homo sapiens GN=RPS16 PE=4 SV=1	145
31	P10412	Histone H1.4 OS=Homo sapiens GN=HIST1H1E PE=1 SV=2	141
32	P31947	14-3-3 protein sigma OS=Homo sapiens GN=SFN PE=1 SV=1	139
33	Q14134	Tripartite motif-containing protein 29 OS=Homo sapiens GN=TRIM29 PE=1 SV=2	137
34	P02768	Serum albumin OS=Homo sapiens GN=ALB PE=1 SV=2	137
35	I1E4Y6	PERQ amino acid-rich with GYF domain-containing protein 2 OS=Homo sapiens GN=GIGYF2 PE=2 SV=1	131
36	P11021	78 kDa glucose-regulated protein OS=Homo sapiens GN=HSPA5 PE=1 SV=2	131
37	F8VRQ1	Heterogeneous nuclear ribonucleoprotein A1 OS=Homo sapiens GN=HNRNPA1 PE=2 SV=1	129
38	P07437	Tubulin beta chain OS=Homo sapiens GN=TUBB PE=1 SV=2	128
39	P68371	Tubulin beta-4B chain OS=Homo sapiens GN=TUBB4B PE=1 SV=1	128
40	M0R0F0	40S ribosomal protein S5 (Fragment) OS=Homo sapiens GN=RPS5 PE=4 SV=1	126
41	P81605	Dermcidin OS=Homo sapiens GN=DCD PE=1 SV=2	125
42	E7EUT4	Glyceraldehyde-3-phosphate dehydrogenase OS=Homo sapiens GN=GAPDH PE=2 SV=1	125
43	B4DIR9	TGF-beta-activated kinase 1 and MAP3K7-binding protein 2 OS=Homo sapiens GN=TAB2 PE=2 SV=1	124
44	G3V5W5	Protein arginine N-methyltransferase 5 OS=Homo sapiens GN=PRMT5 PE=2 SV=1	124
45	P62701	40S ribosomal protein S4, X isoform OS=Homo sapiens GN=RPS4X PE=1 SV=2	124
46	P62269	40S ribosomal protein S18 OS=Homo sapiens GN=RPS18 PE=1 SV=3	121
47	Q13751	Laminin subunit beta-3 OS=Homo sapiens GN=LAMB3 PE=1 SV=1	113
48	P23246	Splicing factor, proline- and glutamine-rich OS=Homo sapiens GN=SFPQ PE=1 SV=2	112
49	Q8WUF5	RelA-associated inhibitor OS=Homo sapiens GN=PPP1R13L PE=1 SV=4	110
50	F8W726	Ubiquitin-associated protein 2-like OS=Homo sapiens GN=UBAP2L PE=2 SV=1	107
51	Q13885	Tubulin beta-2A chain OS=Homo sapiens GN=TUBB2A PE=1 SV=1	106
52	J3QS39	Ubiquitin (Fragment) OS=Homo sapiens GN=UBB PE=4 SV=1	105
53	P52732	Kinesin-like protein KIF11 OS=Homo sapiens GN=KIF11 PE=1 SV=2	103
54	Q9Y446	Plakophilin-3 OS=Homo sapiens GN=PKP3 PE=1 SV=1	99
55	O00571	ATP-dependent RNA helicase DDX3X OS=Homo sapiens GN=DDX3X PE=1 SV=3	98
56	A6NHL2	Tubulin alpha chain-like 3 OS=Homo sapiens GN=TUBAL3 PE=1 SV=2	95
57	P20930	Filaggrin OS=Homo sapiens GN=FLG PE=1 SV=3	93
58	F5H7S3	Tropomyosin alpha-1 chain OS=Homo sapiens GN=TPM1 PE=2 SV=2	93
59	P38646	Stress-70 protein, mitochondrial OS=Homo sapiens GN=HSPA9 PE=1 SV=2	92
60	D6RAT0	40S ribosomal protein S3a OS=Homo sapiens GN=RPS3A PE=2 SV=1	92
61	E7EX29	14-3-3 protein zeta/delta (Fragment) OS=Homo sapiens GN=YWHAZ PE=2 SV=1	91
62	Q08188	Protein-glutamine gamma-glutamyltransferase E OS=Homo sapiens GN=TGM3 PE=1 SV=4	91
63	H0YH81	ATP synthase subunit beta (Fragment) OS=Homo sapiens GN=ATP5B PE=3 SV=1	91
64	P11940	Polyadenylate-binding protein 1 OS=Homo sapiens GN=PABPC1 PE=1 SV=2	90
65	H0Y720	Trinucleotide repeat-containing gene 6B protein (Fragment) OS=Homo sapiens GN=TNRC6B PE=4 SV=1	90
66	P22626	Heterogeneous nuclear ribonucleoproteins A2/B1 OS=Homo sapiens GN=HNRNPA2B1 PE=1 SV=2	90
67	Q9NVI7	ATPase family AAA domain-containing protein 3A OS=Homo sapiens GN=ATAD3A PE=1 SV=2	87
68	P06748	Nucleophosmin OS=Homo sapiens GN=NPM1 PE=1 SV=2	86
69	P04350	Tubulin beta-4A chain OS=Homo sapiens GN=TUBB4A PE=1 SV=2	81
70	K7EK63	ATP synthase subunit alpha OS=Homo sapiens GN=ATP5A1 PE=3 SV=1	78
71	Q15233	Non-POU domain-containing octamer-binding protein OS=Homo sapiens GN=NONO PE=1 SV=4	78
72	Q09666	Neuroblast differentiation-associated protein AHNAK OS=Homo sapiens GN=AHNAK PE=1 SV=2	76
73	Q14764	Major vault protein OS=Homo sapiens GN=MVP PE=1 SV=4	75
74	J3KTE4	Ribosomal protein L19 OS=Homo sapiens GN=RPL19 PE=3 SV=1	75
75	P27348	14-3-3 protein theta OS=Homo sapiens GN=YWHAQ PE=1 SV=1	75
76	P61981	14-3-3 protein gamma OS=Homo sapiens GN=YWHAG PE=1 SV=2	75
77	P39019	40S ribosomal protein S19 OS=Homo sapiens GN=RPS19 PE=1 SV=2	74
78	P0C0S8	Histone H2A type 1 OS=Homo sapiens GN=HIST1H2AG PE=1 SV=2	74
79	I3L3P7	40S ribosomal protein S15a OS=Homo sapiens GN=RPS15A PE=2 SV=1	74
80	Q8NDV7	Trinucleotide repeat-containing gene 6A protein OS=Homo sapiens GN=TNRC6A PE=1 SV=2	73
81	H0YK46	40S ribosomal protein S17 (Fragment) OS=Homo sapiens GN=RPS17 PE=2 SV=1	73
82	E9PI39	Elongation factor 1-delta (Fragment) OS=Homo sapiens GN=EEF1D PE=2 SV=1	73
83	P50552	Vasodilator-stimulated phosphoprotein OS=Homo sapiens GN=VASP PE=1 SV=3	73
84	Q96PK6	RNA-binding protein 14 OS=Homo sapiens GN=RBM14 PE=1 SV=2	72
85	J3KTA4	Probable ATP-dependent RNA helicase DDX5 OS=Homo sapiens GN=DDX5 PE=3 SV=1	72
86	G3V210	60S acidic ribosomal protein P0 OS=Homo sapiens GN=RPLP0 PE=2 SV=1	71
87	Q9Y3I0	tRNA-splicing ligase RtcB homolog OS=Homo sapiens GN=C22orf28 PE=1 SV=1	71
88	P62913	60S ribosomal protein L11 OS=Homo sapiens GN=RPL11 PE=1 SV=2	70
89	Q6UWP8	Suprabasin OS=Homo sapiens GN=SBSN PE=2 SV=2	68
90	J3KN67	Tropomyosin alpha-3 chain OS=Homo sapiens GN=TPM3 PE=3 SV=1	66
91	Q6UYC3	Prelamin-A/C OS=Homo sapiens GN=LMNA PE=2 SV=1	66
92	H0YEN5	40S ribosomal protein S2 (Fragment) OS=Homo sapiens GN=RPS2 PE=2 SV=1	65
93	M0QXD6	General transcription factor IIF subunit 1 (Fragment) OS=Homo sapiens GN=GTF2F1 PE=4 SV=1	64
94	Q8TF66	Leucine-rich repeat-containing protein 15 OS=Homo sapiens GN=LRRC15 PE=1 SV=2	64
95	P62277	40S ribosomal protein S13 OS=Homo sapiens GN=RPS13 PE=1 SV=2	63
96	B7Z4C8	60S ribosomal protein L31 OS=Homo sapiens GN=RPL31 PE=2 SV=1	63
97	Q5JNZ5	Putative 40S ribosomal protein S26-like 1 OS=Homo sapiens GN=RPS26P11 PE=5 SV=1	62
98	Q01469	Fatty acid-binding protein, epidermal OS=Homo sapiens GN=FABP5 PE=1 SV=3	62
99	Q5T6W2	Heterogeneous nuclear ribonucleoprotein K (Fragment) OS=Homo sapiens GN=HNRNPK PE=2 SV=1	62
100	O14964	Hepatocyte growth factor-regulated tyrosine kinase substrate OS=Homo sapiens GN=HGS PE=1 SV=1	62
101	F8WE65	Peptidyl-prolyl cis-trans isomerase OS=Homo sapiens GN=PPIA PE=2 SV=1	61
102	B5MCP9	40S ribosomal protein S7 OS=Homo sapiens GN=RPS7 PE=2 SV=1	61
103	G8JLB6	Heterogeneous nuclear ribonucleoprotein H OS=Homo sapiens GN=HNRNPH1 PE=2 SV=1	60
104	B4E1E4	Eukaryotic translation initiation factor 4E type 2 OS=Homo sapiens GN=EIF4E2 PE=2 SV=1	60
105	Q8NC51	Plasminogen activator inhibitor 1 RNA-binding protein OS=Homo sapiens GN=SERBP1 PE=1 SV=2	59
106	P12273	Prolactin-inducible protein OS=Homo sapiens GN=PIP PE=1 SV=1	59
107	P16401	Histone H1.5 OS=Homo sapiens GN=HIST1H1B PE=1 SV=3	58
108	P62851	40S ribosomal protein S25 OS=Homo sapiens GN=RPS25 PE=1 SV=1	58
109	Q08554	Desmocollin-1 OS=Homo sapiens GN=DSC1 PE=1 SV=2	58
110	P0C0S5	Histone H2A.Z OS=Homo sapiens GN=H2AFZ PE=1 SV=2	58
111	P62753	40S ribosomal protein S6 OS=Homo sapiens GN=RPS6 PE=1 SV=1	58
112	Q07021	Complement component 1 Q subcomponent-binding protein, mitochondrial OS=Homo sapiens GN=C1QBP PE=1 SV=1	58
113	P60866	40S ribosomal protein S20 OS=Homo sapiens GN=RPS20 PE=1 SV=1	57
114	I7HJJ0	ADP/ATP translocase 3 (Fragment) OS=Homo sapiens GN=SLC25A6 PE=4 SV=1	57
115	D6RD27	UDP-N-acetylglucosamine transferase subunit ALG13 homolog (Fragment) OS=Homo sapiens GN=ALG13 PE=2 SV=1	57
116	H0Y449	Nuclease-sensitive element-binding protein 1 (Fragment) OS=Homo sapiens GN=YBX1 PE=4 SV=1	57
117	P08238	Heat shock protein HSP 90-beta OS=Homo sapiens GN=HSP90AB1 PE=1 SV=4	56
118	Q6NXT2	Histone H3.3C OS=Homo sapiens GN=H3F3C PE=1 SV=3	56
119	J3QRS3	Myosin regulatory light chain 12A OS=Homo sapiens GN=MYL12A PE=4 SV=1	56
120	E7EQU4	Uncharacterized protein OS=Homo sapiens PE=4 SV=2	56
121	Q8N8S7	Protein enabled homolog OS=Homo sapiens GN=ENAH PE=1 SV=2	56
122	E9PJD9	60S ribosomal protein L27a OS=Homo sapiens GN=RPL27A PE=2 SV=1	56
123	P13639	Elongation factor 2 OS=Homo sapiens GN=EEF2 PE=1 SV=4	55
124	E9PDF6	Unconventional myosin-Ib OS=Homo sapiens GN=MYO1B PE=2 SV=1	55
125	G3V0E8	Poly(RC) binding protein 2, isoform CRA_f OS=Homo sapiens GN=PCBP2 PE=2 SV=1	55
126	Q7Z7A1	Centriolin OS=Homo sapiens GN=CNTRL PE=1 SV=2	54
127	Q15750	TGF-beta-activated kinase 1 and MAP3K7-binding protein 1 OS=Homo sapiens GN=TAB1 PE=1 SV=1	54
128	P23526	Adenosylhomocysteinase OS=Homo sapiens GN=AHCY PE=1 SV=4	54
129	Q9H1C7	Cysteine-rich and transmembrane domain-containing protein 1 OS=Homo sapiens GN=CYSTM1 PE=1 SV=1	53
130	D6RBW1	Eukaryotic translation initiation factor 4E OS=Homo sapiens GN=EIF4E PE=2 SV=1	53
131	P05141	ADP/ATP translocase 2 OS=Homo sapiens GN=SLC25A5 PE=1 SV=7	53
132	O43318	Mitogen-activated protein kinase kinase kinase 7 OS=Homo sapiens GN=MAP3K7 PE=1 SV=1	53
133	P27694	Replication protein A 70 kDa DNA-binding subunit OS=Homo sapiens GN=RPA1 PE=1 SV=2	53
134	F8WE04	Heat shock protein beta-1 OS=Homo sapiens GN=HSPB1 PE=2 SV=1	52
135	K7EJT5	60S ribosomal protein L22 (Fragment) OS=Homo sapiens GN=RPL22 PE=4 SV=1	52
136	Q3V6T2	Girdin OS=Homo sapiens GN=CCDC88A PE=1 SV=2	52
137	A8MUD9	60S ribosomal protein L7 OS=Homo sapiens GN=RPL7 PE=2 SV=1	51
138	H0YMD0	Annexin (Fragment) OS=Homo sapiens GN=ANXA2 PE=2 SV=1	51
139	P17931	Galectin-3 OS=Homo sapiens GN=LGALS3 PE=1 SV=5	51
140	Q5TA58	Protein AGO1 OS=Homo sapiens GN=AGO1 PE=2 SV=1	50

## Sheet: MOK2-FLAG-SBP
MOK2-Flag-SBP
Number	Protein name	Protein description	Protein Score
1	P10809	60 kDa heat shock protein, mitochondrial OS=Homo sapiens GN=HSPD1 PE=1 SV=2	10148
2	Target protein	OS=Homo sapiens GN=MOK1 PE=1 SV=2	4705
3	P11142	Heat shock cognate 71 kDa protein OS=Homo sapiens GN=HSPA8 PE=1 SV=1	2565
4	P07437	Tubulin beta chain OS=Homo sapiens GN=TUBB PE=1 SV=2	2287
5	P68371	Tubulin beta-4B chain OS=Homo sapiens GN=TUBB4B PE=1 SV=1	2111
6	Q13885	Tubulin beta-2A chain OS=Homo sapiens GN=TUBB2A PE=1 SV=1	1978
7	Q9BVA1	Tubulin beta-2B chain OS=Homo sapiens GN=TUBB2B PE=1 SV=1	1963
8	P04350	Tubulin beta-4A chain OS=Homo sapiens GN=TUBB4A PE=1 SV=2	1842
9	E9PN89	Heat shock cognate 71 kDa protein (Fragment) OS=Homo sapiens GN=HSPA8 PE=2 SV=1	1654
10	Q9UQ07	MAPK/MAK/MRK overlapping kinase OS=Homo sapiens GN=MOK PE=2 SV=1	1642
11	E7ERR8	MAPK/MAK/MRK overlapping kinase OS=Homo sapiens GN=MOK PE=2 SV=1	1630
12	P78371	T-complex protein 1 subunit beta OS=Homo sapiens GN=CCT2 PE=1 SV=4	1369
13	P68363	Tubulin alpha-1B chain OS=Homo sapiens GN=TUBA1B PE=1 SV=1	1333
14	F5H5D3	Tubulin alpha-1C chain OS=Homo sapiens GN=TUBA1C PE=2 SV=1	1255
16	A8MUB1	Tubulin alpha-4A chain OS=Homo sapiens GN=TUBA4A PE=2 SV=1	1234
17	G3V1U9	Tubulin alpha-1A chain OS=Homo sapiens GN=TUBA1A PE=2 SV=1	1156
18	P54652	Heat shock-related 70 kDa protein 2 OS=Homo sapiens GN=HSPA2 PE=1 SV=1	1090
19	A8K7Q2	Heat shock cognate 71 kDa protein OS=Homo sapiens GN=HSPA8 PE=2 SV=1	1071
20	P35579	Myosin-9 OS=Homo sapiens GN=MYH9 PE=1 SV=4	893
21	P50990	T-complex protein 1 subunit theta OS=Homo sapiens GN=CCT8 PE=1 SV=4	842
22	P49368	T-complex protein 1 subunit gamma OS=Homo sapiens GN=CCT3 PE=1 SV=4	839
23	Q9BUF5	Tubulin beta-6 chain OS=Homo sapiens GN=TUBB6 PE=1 SV=1	831
24	H0YM36	MAPK/MAK/MRK overlapping kinase (Fragment) OS=Homo sapiens GN=MOK PE=4 SV=1	815
25	P08107	Heat shock 70 kDa protein 1A/1B OS=Homo sapiens GN=HSPA1A PE=1 SV=5	785
26	P50991	T-complex protein 1 subunit delta OS=Homo sapiens GN=CCT4 PE=1 SV=4	757
27	P17987	T-complex protein 1 subunit alpha OS=Homo sapiens GN=TCP1 PE=1 SV=1	706
28	P23396	40S ribosomal protein S3 OS=Homo sapiens GN=RPS3 PE=1 SV=2	668
29	Q00839	Heterogeneous nuclear ribonucleoprotein U OS=Homo sapiens GN=HNRNPU PE=1 SV=6	642
30	P27708	CAD protein OS=Homo sapiens GN=CAD PE=1 SV=3	627
31	Q08211	ATP-dependent RNA helicase A OS=Homo sapiens GN=DHX9 PE=1 SV=4	614
32	P62701	40S ribosomal protein S4, X isoform OS=Homo sapiens GN=RPS4X PE=1 SV=2	609
33	P19338	Nucleolin OS=Homo sapiens GN=NCL PE=1 SV=3	594
34	P38646	Stress-70 protein, mitochondrial OS=Homo sapiens GN=HSPA9 PE=1 SV=2	581
35	Q92598	Heat shock protein 105 kDa OS=Homo sapiens GN=HSPH1 PE=1 SV=1	572
36	P60709	Actin, cytoplasmic 1 OS=Homo sapiens GN=ACTB PE=1 SV=1	558
37	Q99832	T-complex protein 1 subunit eta OS=Homo sapiens GN=CCT7 PE=1 SV=2	556
38	P61247	40S ribosomal protein S3a OS=Homo sapiens GN=RPS3A PE=1 SV=2	547
39	P48643	T-complex protein 1 subunit epsilon OS=Homo sapiens GN=CCT5 PE=1 SV=1	542
40	P11021	78 kDa glucose-regulated protein OS=Homo sapiens GN=HSPA5 PE=1 SV=2	536
41	P31689	DnaJ homolog subfamily A member 1 OS=Homo sapiens GN=DNAJA1 PE=1 SV=2	529
42	P34931	Heat shock 70 kDa protein 1-like OS=Homo sapiens GN=HSPA1L PE=1 SV=2	514
43	P08238	Heat shock protein HSP 90-beta OS=Homo sapiens GN=HSP90AB1 PE=1 SV=4	508
44	Q9Y265	RuvB-like 1 OS=Homo sapiens GN=RUVBL1 PE=1 SV=1	491
45	Q9UNE7	E3 ubiquitin-protein ligase CHIP OS=Homo sapiens GN=STUB1 PE=1 SV=2	473
46	P49411	Elongation factor Tu, mitochondrial OS=Homo sapiens GN=TUFM PE=1 SV=2	458
47	P12236	ADP/ATP translocase 3 OS=Homo sapiens GN=SLC25A6 PE=1 SV=4	456
48	P15880	40S ribosomal protein S2 OS=Homo sapiens GN=RPS2 PE=1 SV=2	451
49	P52272	Heterogeneous nuclear ribonucleoprotein M OS=Homo sapiens GN=HNRNPM PE=1 SV=3	445
50	P52732	Kinesin-like protein KIF11 OS=Homo sapiens GN=KIF11 PE=1 SV=2	443
51	Q86YZ3	Hornerin OS=Homo sapiens GN=HRNR PE=1 SV=2	440
52	P34932	Heat shock 70 kDa protein 4 OS=Homo sapiens GN=HSPA4 PE=1 SV=4	433
53	P05141	ADP/ATP translocase 2 OS=Homo sapiens GN=SLC25A5 PE=1 SV=7	433
54	O60884	DnaJ homolog subfamily A member 2 OS=Homo sapiens GN=DNAJA2 PE=1 SV=1	431
55	O60506	Heterogeneous nuclear ribonucleoprotein Q OS=Homo sapiens GN=SYNCRIP PE=1 SV=2	419
56	F8VRQ1	Heterogeneous nuclear ribonucleoprotein A1 OS=Homo sapiens GN=HNRNPA1 PE=2 SV=1	408
57	Q13451	Peptidyl-prolyl cis-trans isomerase FKBP5 OS=Homo sapiens GN=FKBP5 PE=1 SV=2	394
58	Q8N3C0	Activating signal cointegrator 1 complex subunit 3 OS=Homo sapiens GN=ASCC3 PE=1 SV=3	394
59	Q13200	26S proteasome non-ATPase regulatory subunit 2 OS=Homo sapiens GN=PSMD2 PE=1 SV=3	389
60	P07900	Heat shock protein HSP 90-alpha OS=Homo sapiens GN=HSP90AA1 PE=1 SV=5	375
61	P68104	Elongation factor 1-alpha 1 OS=Homo sapiens GN=EEF1A1 PE=1 SV=1	370
62	Q9Y230	RuvB-like 2 OS=Homo sapiens GN=RUVBL2 PE=1 SV=3	361
63	P62424	60S ribosomal protein L7a OS=Homo sapiens GN=RPL7A PE=1 SV=2	356
64	P18124	60S ribosomal protein L7 OS=Homo sapiens GN=RPL7 PE=1 SV=1	356
65	P68032	Actin, alpha cardiac muscle 1 OS=Homo sapiens GN=ACTC1 PE=1 SV=1	353
66	F5GWP8	Junction plakoglobin OS=Homo sapiens GN=JUP PE=2 SV=1	349
67	Q99615	DnaJ homolog subfamily C member 7 OS=Homo sapiens GN=DNAJC7 PE=1 SV=2	337
68	J3KTA4	Probable ATP-dependent RNA helicase DDX5 OS=Homo sapiens GN=DDX5 PE=3 SV=1	336
69	Q13751	Laminin subunit beta-3 OS=Homo sapiens GN=LAMB3 PE=1 SV=1	333
70	E9PM13	Heat shock cognate 71 kDa protein (Fragment) OS=Homo sapiens GN=HSPA8 PE=2 SV=1	332
71	O00571	ATP-dependent RNA helicase DDX3X OS=Homo sapiens GN=DDX3X PE=1 SV=3	331
72	Q5T6W5	Heterogeneous nuclear ribonucleoprotein K OS=Homo sapiens GN=HNRNPK PE=2 SV=1	328
73	P62277	40S ribosomal protein S13 OS=Homo sapiens GN=RPS13 PE=1 SV=2	325
74	O95816	BAG family molecular chaperone regulator 2 OS=Homo sapiens GN=BAG2 PE=1 SV=1	324
75	P27635	60S ribosomal protein L10 OS=Homo sapiens GN=RPL10 PE=1 SV=4	321
76	B3KQ59	RuvB-like 2 OS=Homo sapiens GN=RUVBL2 PE=2 SV=1	319
77	Q5H9R7	Serine/threonine-protein phosphatase 6 regulatory subunit 3 OS=Homo sapiens GN=PPP6R3 PE=1 SV=2	317
78	P11940	Polyadenylate-binding protein 1 OS=Homo sapiens GN=PABPC1 PE=1 SV=2	316
79	Q9UJS0	Calcium-binding mitochondrial carrier protein Aralar2 OS=Homo sapiens GN=SLC25A13 PE=1 SV=2	315
80	P12235	ADP/ATP translocase 1 OS=Homo sapiens GN=SLC25A4 PE=1 SV=4	315
81	Q9NVI7-2	Isoform 2 of ATPase family AAA domain-containing protein 3A OS=Homo sapiens GN=ATAD3A	303
82	P62750	60S ribosomal protein L23a OS=Homo sapiens GN=RPL23A PE=1 SV=1	297
83	H0YK46	40S ribosomal protein S17 (Fragment) OS=Homo sapiens GN=RPS17 PE=2 SV=1	290
84	Q5SWX8	Protein odr-4 homolog OS=Homo sapiens GN=ODR4 PE=2 SV=1	288
85	P13639	Elongation factor 2 OS=Homo sapiens GN=EEF2 PE=1 SV=4	282
86	H7BXY3	Putative ATP-dependent RNA helicase DHX30 OS=Homo sapiens GN=DHX30 PE=2 SV=1	277
87	Q5SRE5	Nucleoporin NUP188 homolog OS=Homo sapiens GN=NUP188 PE=1 SV=1	277
88	A5A3E0	POTE ankyrin domain family member F OS=Homo sapiens GN=POTEF PE=1 SV=2	275
89	O75746	Calcium-binding mitochondrial carrier protein Aralar1 OS=Homo sapiens GN=SLC25A12 PE=1 SV=2	274
90	P62979	Ubiquitin-40S ribosomal protein S27a OS=Homo sapiens GN=RPS27A PE=1 SV=2	274
91	I3L1P8	Mitochondrial 2-oxoglutarate/malate carrier protein (Fragment) OS=Homo sapiens GN=SLC25A11 PE=2 SV=1	274
92	P40227	T-complex protein 1 subunit zeta OS=Homo sapiens GN=CCT6A PE=1 SV=3	273
93	P52597	Heterogeneous nuclear ribonucleoprotein F OS=Homo sapiens GN=HNRNPF PE=1 SV=3	273
94	K7EM38	Actin, cytoplasmic 2, N-terminally processed (Fragment) OS=Homo sapiens GN=ACTG1 PE=3 SV=1	268
95	P62829	60S ribosomal protein L23 OS=Homo sapiens GN=RPL23 PE=1 SV=1	255
96	P39019	40S ribosomal protein S19 OS=Homo sapiens GN=RPS19 PE=1 SV=2	254
97	P40429	60S ribosomal protein L13a OS=Homo sapiens GN=RPL13A PE=1 SV=2	253
98	P06748	Nucleophosmin OS=Homo sapiens GN=NPM1 PE=1 SV=2	251
99	G8JLB6	Heterogeneous nuclear ribonucleoprotein H OS=Homo sapiens GN=HNRNPH1 PE=2 SV=1	250
100	J3KRX5	60S ribosomal protein L17 (Fragment) OS=Homo sapiens GN=RPL17 PE=3 SV=1	248
101	Q5JW30	Double-stranded RNA-binding protein Staufen homolog 1 OS=Homo sapiens GN=STAU1 PE=2 SV=1	243
102	P05388	60S acidic ribosomal protein P0 OS=Homo sapiens GN=RPLP0 PE=1 SV=1	242
103	P39023	60S ribosomal protein L3 OS=Homo sapiens GN=RPL3 PE=1 SV=2	241
104	Q16531	DNA damage-binding protein 1 OS=Homo sapiens GN=DDB1 PE=1 SV=1	241
105	P62249	40S ribosomal protein S16 OS=Homo sapiens GN=RPS16 PE=1 SV=2	237
106	Q9Y3I0	tRNA-splicing ligase RtcB homolog OS=Homo sapiens GN=C22orf28 PE=1 SV=1	234
107	Q13753	Laminin subunit gamma-2 OS=Homo sapiens GN=LAMC2 PE=1 SV=2	232
108	P22626	Heterogeneous nuclear ribonucleoproteins A2/B1 OS=Homo sapiens GN=HNRNPA2B1 PE=1 SV=2	226
109	P16989	DNA-binding protein A OS=Homo sapiens GN=CSDA PE=1 SV=4	225
110	P46781	40S ribosomal protein S9 OS=Homo sapiens GN=RPS9 PE=1 SV=3	224
111	P62241	40S ribosomal protein S8 OS=Homo sapiens GN=RPS8 PE=1 SV=2	224
112	Q9Y6N5	Sulfide:quinone oxidoreductase, mitochondrial OS=Homo sapiens GN=SQRDL PE=1 SV=1	224
113	P16615	Sarcoplasmic/endoplasmic reticulum calcium ATPase 2 OS=Homo sapiens GN=ATP2A2 PE=1 SV=1	223
114	P07996	Thrombospondin-1 OS=Homo sapiens GN=THBS1 PE=1 SV=2	220
115	F5H136	T-complex protein 1 subunit alpha (Fragment) OS=Homo sapiens GN=TCP1 PE=2 SV=1	219
116	E5RI99	60S ribosomal protein L30 (Fragment) OS=Homo sapiens GN=RPL30 PE=2 SV=1	217
117	Q3KQU3	MAP7 domain-containing protein 1 OS=Homo sapiens GN=MAP7D1 PE=1 SV=1	216
118	P62851	40S ribosomal protein S25 OS=Homo sapiens GN=RPS25 PE=1 SV=1	215
119	P26373	60S ribosomal protein L13 OS=Homo sapiens GN=RPL13 PE=1 SV=4	213
120	A6NHL2	Tubulin alpha chain-like 3 OS=Homo sapiens GN=TUBAL3 PE=1 SV=2	211
121	O95831	Apoptosis-inducing factor 1, mitochondrial OS=Homo sapiens GN=AIFM1 PE=1 SV=1	211
122	P61254	60S ribosomal protein L26 OS=Homo sapiens GN=RPL26 PE=1 SV=1	210
123	F5H3A1	Sodium/potassium-transporting ATPase subunit alpha-1 OS=Homo sapiens GN=ATP1A1 PE=2 SV=1	210
124	P62263	40S ribosomal protein S14 OS=Homo sapiens GN=RPS14 PE=1 SV=3	209
125	Q5T9A4	ATPase family AAA domain-containing protein 3B OS=Homo sapiens GN=ATAD3B PE=1 SV=1	208
126	O75489	NADH dehydrogenase [ubiquinone] iron-sulfur protein 3, mitochondrial OS=Homo sapiens GN=NDUFS3 PE=1 SV=1	204
127	Q96P70	Importin-9 OS=Homo sapiens GN=IPO9 PE=1 SV=3	203
128	Q9Y224	UPF0568 protein C14orf166 OS=Homo sapiens GN=C14orf166 PE=1 SV=1	202
129	K7ENP3	ATP synthase subunit alpha OS=Homo sapiens GN=ATP5A1 PE=3 SV=1	202
130	P62081	40S ribosomal protein S7 OS=Homo sapiens GN=RPS7 PE=1 SV=1	202
131	P62913	60S ribosomal protein L11 OS=Homo sapiens GN=RPL11 PE=1 SV=2	200
132	O15355	Protein phosphatase 1G OS=Homo sapiens GN=PPM1G PE=1 SV=1	199
133	Q07065	Cytoskeleton-associated protein 4 OS=Homo sapiens GN=CKAP4 PE=1 SV=2	198
134	P62269	40S ribosomal protein S18 OS=Homo sapiens GN=RPS18 PE=1 SV=3	198
135	H7C2U0	T-complex protein 1 subunit theta (Fragment) OS=Homo sapiens GN=CCT8 PE=4 SV=1	197
136	O95373	Importin-7 OS=Homo sapiens GN=IPO7 PE=1 SV=1	196
137	Q6ZRV2	Protein FAM83H OS=Homo sapiens GN=FAM83H PE=1 SV=3	190
138	P30050	60S ribosomal protein L12 OS=Homo sapiens GN=RPL12 PE=1 SV=1	190
139	Q9UL15	BAG family molecular chaperone regulator 5 OS=Homo sapiens GN=BAG5 PE=1 SV=1	190
140	P62280	40S ribosomal protein S11 OS=Homo sapiens GN=RPS11 PE=1 SV=3	190
141	Q9UQ07-4	Isoform 4 of MAPK/MAK/MRK overlapping kinase OS=Homo sapiens GN=MOK	190
142	Q5D862	Filaggrin-2 OS=Homo sapiens GN=FLG2 PE=1 SV=1	189
143	C9J2Y9	DNA-directed RNA polymerase OS=Homo sapiens GN=POLR2B PE=2 SV=2	189
144	Q6PKG0	La-related protein 1 OS=Homo sapiens GN=LARP1 PE=1 SV=2	187
145	P25205	DNA replication licensing factor MCM3 OS=Homo sapiens GN=MCM3 PE=1 SV=3	186
146	P35998	26S protease regulatory subunit 7 OS=Homo sapiens GN=PSMC2 PE=1 SV=3	185
147	M0R117	60S ribosomal protein L18a OS=Homo sapiens GN=RPL18A PE=4 SV=1	183
148	P62906	60S ribosomal protein L10a OS=Homo sapiens GN=RPL10A PE=1 SV=2	183
149	E7EPB3	60S ribosomal protein L14 OS=Homo sapiens GN=RPL14 PE=2 SV=1	183
150	F8VZS0	60S acidic ribosomal protein P0 (Fragment) OS=Homo sapiens GN=RPLP0 PE=2 SV=1	183
151	P67809	Nuclease-sensitive element-binding protein 1 OS=Homo sapiens GN=YBX1 PE=1 SV=3	182
152	G5E9M5	Interleukin enhancer binding factor 3, 90kDa, isoform CRA_b OS=Homo sapiens GN=ILF3 PE=2 SV=1	181
153	Q13151	Heterogeneous nuclear ribonucleoprotein A0 OS=Homo sapiens GN=HNRNPA0 PE=1 SV=1	180
154	Q9NZB2	Constitutive coactivator of PPAR-gamma-like protein 1 OS=Homo sapiens GN=FAM120A PE=1 SV=2	180
155	P46778	60S ribosomal protein L21 OS=Homo sapiens GN=RPL21 PE=1 SV=2	177
156	G3V5W5	Protein arginine N-methyltransferase 5 OS=Homo sapiens GN=PRMT5 PE=2 SV=1	177
157	Q9BQA1	Methylosome protein 50 OS=Homo sapiens GN=WDR77 PE=1 SV=1	177
158	O43390	Heterogeneous nuclear ribonucleoprotein R OS=Homo sapiens GN=HNRNPR PE=1 SV=1	175
159	C9JNW5	60S ribosomal protein L24 OS=Homo sapiens GN=RPL24 PE=2 SV=1	175
160	P63173	60S ribosomal protein L38 OS=Homo sapiens GN=RPL38 PE=1 SV=2	174
161	P23458	Tyrosine-protein kinase JAK1 OS=Homo sapiens GN=JAK1 PE=1 SV=2	173
162	B4DRT2	28S ribosomal protein S27, mitochondrial OS=Homo sapiens GN=MRPS27 PE=2 SV=1	173
163	H0Y5F5	Polyadenylate-binding protein 4 (Fragment) OS=Homo sapiens GN=PABPC4 PE=4 SV=1	173
164	Q9Y3D9	28S ribosomal protein S23, mitochondrial OS=Homo sapiens GN=MRPS23 PE=1 SV=2	173
165	P63151	Serine/threonine-protein phosphatase 2A 55 kDa regulatory subunit B alpha isoform OS=Homo sapiens GN=PPP2R2A PE=1 SV=1	170
166	P46783	40S ribosomal protein S10 OS=Homo sapiens GN=RPS10 PE=1 SV=1	168
167	E7ES43	Heat shock 70 kDa protein 4L OS=Homo sapiens GN=HSPA4L PE=2 SV=2	167
168	Q96TC7	Regulator of microtubule dynamics protein 3 OS=Homo sapiens GN=RMDN3 PE=1 SV=2	167
169	P62266	40S ribosomal protein S23 OS=Homo sapiens GN=RPS23 PE=1 SV=3	165
170	E9PKZ0	60S ribosomal protein L8 OS=Homo sapiens GN=RPL8 PE=2 SV=1	165
171	P62753	40S ribosomal protein S6 OS=Homo sapiens GN=RPS6 PE=1 SV=1	165
172	Q99729-3	Isoform 3 of Heterogeneous nuclear ribonucleoprotein A/B OS=Homo sapiens GN=HNRNPAB	165
173	G3V0I6	OTU domain containing 4, isoform CRA_f OS=Homo sapiens GN=OTUD4 PE=2 SV=1	161
174	P25398	40S ribosomal protein S12 OS=Homo sapiens GN=RPS12 PE=1 SV=3	161
175	Q9UNX3	60S ribosomal protein L26-like 1 OS=Homo sapiens GN=RPL26L1 PE=1 SV=1	160
176	Q01650	Large neutral amino acids transporter small subunit 1 OS=Homo sapiens GN=SLC7A5 PE=1 SV=2	159
177	B0YJC4	Vimentin OS=Homo sapiens GN=VIM PE=2 SV=1	159
178	P46779	60S ribosomal protein L28 OS=Homo sapiens GN=RPL28 PE=1 SV=3	159
179	P30153	Serine/threonine-protein phosphatase 2A 65 kDa regulatory subunit A alpha isoform OS=Homo sapiens GN=PPP2R1A PE=1 SV=4	158
180	M0R0F0	40S ribosomal protein S5 (Fragment) OS=Homo sapiens GN=RPS5 PE=4 SV=1	157
181	P27348	14-3-3 protein theta OS=Homo sapiens GN=YWHAQ PE=1 SV=1	157
182	H0YA55	Serum albumin (Fragment) OS=Homo sapiens GN=ALB PE=4 SV=1	154
183	P05387	60S acidic ribosomal protein P2 OS=Homo sapiens GN=RPLP2 PE=1 SV=1	153
184	B4DR52	Histone H2B OS=Homo sapiens GN=HIST2H2BF PE=2 SV=1	153
185	P42677	40S ribosomal protein S27 OS=Homo sapiens GN=RPS27 PE=1 SV=3	152
186	Q13283	Ras GTPase-activating protein-binding protein 1 OS=Homo sapiens GN=G3BP1 PE=1 SV=1	152
187	Q92499	ATP-dependent RNA helicase DDX1 OS=Homo sapiens GN=DDX1 PE=1 SV=2	151
188	Q7Z2W4	Zinc finger CCCH-type antiviral protein 1 OS=Homo sapiens GN=ZC3HAV1 PE=1 SV=3	149
189	P35268	60S ribosomal protein L22 OS=Homo sapiens GN=RPL22 PE=1 SV=2	148
190	Q99460	26S proteasome non-ATPase regulatory subunit 1 OS=Homo sapiens GN=PSMD1 PE=1 SV=2	146
191	O00743	Serine/threonine-protein phosphatase 6 catalytic subunit OS=Homo sapiens GN=PPP6C PE=1 SV=1	146
192	P17655	Calpain-2 catalytic subunit OS=Homo sapiens GN=CAPN2 PE=1 SV=6	145
193	P82933	28S ribosomal protein S9, mitochondrial OS=Homo sapiens GN=MRPS9 PE=1 SV=2	145
194	F8WCY5	Reticulocalbin-2 OS=Homo sapiens GN=RCN2 PE=2 SV=1	145
195	P62987	Ubiquitin-60S ribosomal protein L40 OS=Homo sapiens GN=UBA52 PE=1 SV=2	144
196	P53621	Coatomer subunit alpha OS=Homo sapiens GN=COPA PE=1 SV=2	144
197	Q9BRX2	Protein pelota homolog OS=Homo sapiens GN=PELO PE=1 SV=2	142
198	P07814	Bifunctional glutamate/proline--tRNA ligase OS=Homo sapiens GN=EPRS PE=1 SV=5	137
199	B9A067	Mitochondrial inner membrane protein OS=Homo sapiens GN=IMMT PE=2 SV=2	137
200	Q8WXX5	DnaJ homolog subfamily C member 9 OS=Homo sapiens GN=DNAJC9 PE=1 SV=1	136
201	P41091	Eukaryotic translation initiation factor 2 subunit 3 OS=Homo sapiens GN=EIF2S3 PE=1 SV=3	135
202	P14923	Junction plakoglobin OS=Homo sapiens GN=JUP PE=1 SV=3	135
203	P82673	28S ribosomal protein S35, mitochondrial OS=Homo sapiens GN=MRPS35 PE=1 SV=1	135
204	Q8NCA5	Protein FAM98A OS=Homo sapiens GN=FAM98A PE=1 SV=1	134
205	Q9NZN4	EH domain-containing protein 2 OS=Homo sapiens GN=EHD2 PE=1 SV=2	134
206	B7Z4B8	Heterogeneous nuclear ribonucleoprotein U-like protein 1 OS=Homo sapiens GN=HNRNPUL1 PE=2 SV=1	134
207	J3QLS3	28S ribosomal protein S7, mitochondrial OS=Homo sapiens GN=MRPS7 PE=4 SV=1	133
208	P63104	14-3-3 protein zeta/delta OS=Homo sapiens GN=YWHAZ PE=1 SV=1	133
209	P13489	Ribonuclease inhibitor OS=Homo sapiens GN=RNH1 PE=1 SV=2	133
210	Q96EY7	Pentatricopeptide repeat domain-containing protein 3, mitochondrial OS=Homo sapiens GN=PTCD3 PE=1 SV=3	132
211	P46940	Ras GTPase-activating-like protein IQGAP1 OS=Homo sapiens GN=IQGAP1 PE=1 SV=1	131
212	P04843	Dolichyl-diphosphooligosaccharide--protein glycosyltransferase subunit 1 OS=Homo sapiens GN=RPN1 PE=1 SV=1	131
213	P23528	Cofilin-1 OS=Homo sapiens GN=CFL1 PE=1 SV=3	131
214	E9PLL6	60S ribosomal protein L27a OS=Homo sapiens GN=RPL27A PE=2 SV=1	130
215	P62854	40S ribosomal protein S26 OS=Homo sapiens GN=RPS26 PE=1 SV=3	130
216	P42704	Leucine-rich PPR motif-containing protein, mitochondrial OS=Homo sapiens GN=LRPPRC PE=1 SV=3	130
217	Q9BVP2	Guanine nucleotide-binding protein-like 3 OS=Homo sapiens GN=GNL3 PE=1 SV=2	128
218	G5E9V5	28S ribosomal protein S22, mitochondrial OS=Homo sapiens GN=MRPS22 PE=2 SV=1	128
219	G3V5Z7	Proteasome subunit alpha type OS=Homo sapiens GN=PSMA6 PE=2 SV=1	126
220	Q12905	Interleukin enhancer-binding factor 2 OS=Homo sapiens GN=ILF2 PE=1 SV=2	126
221	Q86VP6	Cullin-associated NEDD8-dissociated protein 1 OS=Homo sapiens GN=CAND1 PE=1 SV=2	126
222	P31946	14-3-3 protein beta/alpha OS=Homo sapiens GN=YWHAB PE=1 SV=3	126
223	B4DP11	Prostaglandin E synthase 3 OS=Homo sapiens GN=PTGES3 PE=2 SV=1	125
224	K7EMH1	60S ribosomal protein L22 (Fragment) OS=Homo sapiens GN=RPL22 PE=4 SV=1	125
225	P06899	Histone H2B type 1-J OS=Homo sapiens GN=HIST1H2BJ PE=1 SV=3	125
226	Q00325	Phosphate carrier protein, mitochondrial OS=Homo sapiens GN=SLC25A3 PE=1 SV=2	123
227	Q96PY5	Formin-like protein 2 OS=Homo sapiens GN=FMNL2 PE=1 SV=3	123
228	B0YJ33	Laminin alpha-3 chain variant 2 OS=Homo sapiens GN=LAMA3 PE=2 SV=1	122
229	Q7L7V1	Putative pre-mRNA-splicing factor ATP-dependent RNA helicase DHX32 OS=Homo sapiens GN=DHX32 PE=1 SV=1	122
230	H0Y8C2	60S ribosomal protein L22-like 1 (Fragment) OS=Homo sapiens GN=RPL22L1 PE=2 SV=1	120
231	P60866	40S ribosomal protein S20 OS=Homo sapiens GN=RPS20 PE=1 SV=1	120
232	G5E9Q2	Cold shock domain containing E1, RNA-binding, isoform CRA_d OS=Homo sapiens GN=CSDE1 PE=2 SV=1	120
233	D3YTB1	60S ribosomal protein L32 (Fragment) OS=Homo sapiens GN=RPL32 PE=2 SV=1	119
234	Q9UN86	Ras GTPase-activating protein-binding protein 2 OS=Homo sapiens GN=G3BP2 PE=1 SV=2	119
235	H3BLZ8	Probable ATP-dependent RNA helicase DDX17 OS=Homo sapiens GN=DDX17 PE=2 SV=1	118
236	F8W930	Insulin-like growth factor 2 mRNA-binding protein 2 OS=Homo sapiens GN=IGF2BP2 PE=2 SV=1	118
237	E7EWI9	Heterogeneous nuclear ribonucleoprotein A3 OS=Homo sapiens GN=HNRNPA3 PE=2 SV=1	118
238	P18077	60S ribosomal protein L35a OS=Homo sapiens GN=RPL35A PE=1 SV=2	118
239	P09543	2~,3~-cyclic-nucleotide 3~-phosphodiesterase OS=Homo sapiens GN=CNP PE=1 SV=2	118
240	P36542	ATP synthase subunit gamma, mitochondrial OS=Homo sapiens GN=ATP5C1 PE=1 SV=1	116
241	P50402	Emerin OS=Homo sapiens GN=EMD PE=1 SV=1	116
242	Q96TA2	ATP-dependent zinc metalloprotease YME1L1 OS=Homo sapiens GN=YME1L1 PE=1 SV=2	116
243	Q9HCN4	GPN-loop GTPase 1 OS=Homo sapiens GN=GPN1 PE=1 SV=1	115
244	Q92900	Regulator of nonsense transcripts 1 OS=Homo sapiens GN=UPF1 PE=1 SV=2	113
245	Q9Y678	Coatomer subunit gamma-1 OS=Homo sapiens GN=COPG1 PE=1 SV=1	113
246	Q9UPN7	Serine/threonine-protein phosphatase 6 regulatory subunit 1 OS=Homo sapiens GN=PPP6R1 PE=1 SV=5	113
247	C9J2C4	DnaJ homolog subfamily B member 6 (Fragment) OS=Homo sapiens GN=DNAJB6 PE=2 SV=1	112
248	Q9Y399	28S ribosomal protein S2, mitochondrial OS=Homo sapiens GN=MRPS2 PE=1 SV=1	112
249	P53618	Coatomer subunit beta OS=Homo sapiens GN=COPB1 PE=1 SV=3	112
250	P62195	26S protease regulatory subunit 8 OS=Homo sapiens GN=PSMC5 PE=1 SV=1	112
251	B4DNJ6	Serine-threonine kinase receptor-associated protein OS=Homo sapiens GN=STRAP PE=2 SV=1	111
252	Q9Y6Y0	Influenza virus NS1A-binding protein OS=Homo sapiens GN=IVNS1ABP PE=1 SV=3	110
253	Q969Q0	60S ribosomal protein L36a-like OS=Homo sapiens GN=RPL36AL PE=1 SV=3	110
254	Q14103	Heterogeneous nuclear ribonucleoprotein D0 OS=Homo sapiens GN=HNRNPD PE=1 SV=1	109
255	O95782	AP-2 complex subunit alpha-1 OS=Homo sapiens GN=AP2A1 PE=1 SV=3	109
256	H0YMV8	40S ribosomal protein S27 OS=Homo sapiens GN=RPS27L PE=2 SV=1	109
257	B4DP62	Solute carrier family 25 (Mitochondrial carrier; citrate transporter), member 1, isoform CRA_b OS=Homo sapiens GN=SLC25A1 PE=2 SV=1	108
258	Q9NR30	Nucleolar RNA helicase 2 OS=Homo sapiens GN=DDX21 PE=1 SV=5	108
259	O43143	Putative pre-mRNA-splicing factor ATP-dependent RNA helicase DHX15 OS=Homo sapiens GN=DHX15 PE=1 SV=2	107
260	P42766	60S ribosomal protein L35 OS=Homo sapiens GN=RPL35 PE=1 SV=2	106
261	Q12797	Aspartyl/asparaginyl beta-hydroxylase OS=Homo sapiens GN=ASPH PE=1 SV=3	106
262	P53985	Monocarboxylate transporter 1 OS=Homo sapiens GN=SLC16A1 PE=1 SV=3	106
263	Q14974	Importin subunit beta-1 OS=Homo sapiens GN=KPNB1 PE=1 SV=2	103
264	H0Y5B4	60S ribosomal protein L36a (Fragment) OS=Homo sapiens GN=RPL36A PE=3 SV=1	101
265	P61981	14-3-3 protein gamma OS=Homo sapiens GN=YWHAG PE=1 SV=2	101
266	H3BVG0	Nuclear pore complex protein Nup93 OS=Homo sapiens GN=NUP93 PE=2 SV=1	101
267	H0YDU8	Serine/threonine-protein phosphatase (Fragment) OS=Homo sapiens GN=PPP5C PE=3 SV=1	100
268	B0YIW6	Archain 1, isoform CRA_a OS=Homo sapiens GN=ARCN1 PE=2 SV=1	100
269	O60783	28S ribosomal protein S14, mitochondrial OS=Homo sapiens GN=MRPS14 PE=1 SV=1	100
270	Q9Y676	28S ribosomal protein S18b, mitochondrial OS=Homo sapiens GN=MRPS18B PE=1 SV=1	100
271	Q15365	Poly(rC)-binding protein 1 OS=Homo sapiens GN=PCBP1 PE=1 SV=2	99
272	F5H874	Activating signal cointegrator 1 complex subunit 1 OS=Homo sapiens GN=ASCC1 PE=2 SV=1	99
273	Q96EK5	KIF1-binding protein OS=Homo sapiens GN=KIAA1279 PE=1 SV=1	99
274	P61353	60S ribosomal protein L27 OS=Homo sapiens GN=RPL27 PE=1 SV=2	98
275	P62805	Histone H4 OS=Homo sapiens GN=HIST1H4A PE=1 SV=2	98
276	P60981	Destrin OS=Homo sapiens GN=DSTN PE=1 SV=3	98
277	P17812	CTP synthase 1 OS=Homo sapiens GN=CTPS1 PE=1 SV=2	97
278	K7ELQ0	39S ribosomal protein L4, mitochondrial OS=Homo sapiens GN=MRPL4 PE=4 SV=1	97
279	Q96EY1	DnaJ homolog subfamily A member 3, mitochondrial OS=Homo sapiens GN=DNAJA3 PE=1 SV=2	96
280	Q3ZCQ8	Mitochondrial import inner membrane translocase subunit TIM50 OS=Homo sapiens GN=TIMM50 PE=1 SV=2	96
281	Q8NB46	Serine/threonine-protein phosphatase 6 regulatory ankyrin repeat subunit C OS=Homo sapiens GN=ANKRD52 PE=1 SV=3	95
282	Q9NUQ6	SPATS2-like protein OS=Homo sapiens GN=SPATS2L PE=1 SV=2	94
283	J3KQ73	Peptidyl-prolyl cis-trans isomerase FKBP8 OS=Homo sapiens GN=FKBP8 PE=4 SV=1	94
284	P51398	28S ribosomal protein S29, mitochondrial OS=Homo sapiens GN=DAP3 PE=1 SV=1	94
285	Q5T653	39S ribosomal protein L2, mitochondrial OS=Homo sapiens GN=MRPL2 PE=1 SV=2	94
286	E7ESU4	N-acetyltransferase 10 OS=Homo sapiens GN=NAT10 PE=2 SV=1	94
287	K7ELC2	40S ribosomal protein S15 OS=Homo sapiens GN=RPS15 PE=3 SV=1	94
288	P25786	Proteasome subunit alpha type-1 OS=Homo sapiens GN=PSMA1 PE=1 SV=1	93
289	C9JPM4	ADP-ribosylation factor 4 (Fragment) OS=Homo sapiens GN=ARF4 PE=2 SV=1	92
290	Q9Y295	Developmentally-regulated GTP-binding protein 1 OS=Homo sapiens GN=DRG1 PE=1 SV=1	92
291	P82914	28S ribosomal protein S15, mitochondrial OS=Homo sapiens GN=MRPS15 PE=1 SV=1	92
292	Q8NF37	Lysophosphatidylcholine acyltransferase 1 OS=Homo sapiens GN=LPCAT1 PE=1 SV=2	91
293	Q58FF6	Putative heat shock protein HSP 90-beta 4 OS=Homo sapiens GN=HSP90AB4P PE=5 SV=1	91
294	P62273	40S ribosomal protein S29 OS=Homo sapiens GN=RPS29 PE=1 SV=2	91
295	Q9UKA4	A-kinase anchor protein 11 OS=Homo sapiens GN=AKAP11 PE=1 SV=1	91
296	Q9UKD2	mRNA turnover protein 4 homolog OS=Homo sapiens GN=MRTO4 PE=1 SV=2	90
297	Q9H6T3	RNA polymerase II-associated protein 3 OS=Homo sapiens GN=RPAP3 PE=1 SV=2	90
298	E5RHW4	Erlin-2 (Fragment) OS=Homo sapiens GN=ERLIN2 PE=2 SV=1	89
299	P82675	28S ribosomal protein S5, mitochondrial OS=Homo sapiens GN=MRPS5 PE=1 SV=2	89
300	P40939	Trifunctional enzyme subunit alpha, mitochondrial OS=Homo sapiens GN=HADHA PE=1 SV=2	88
301	Q9H0S4	Probable ATP-dependent RNA helicase DDX47 OS=Homo sapiens GN=DDX47 PE=1 SV=1	88
302	Q5T160	Probable arginine--tRNA ligase, mitochondrial OS=Homo sapiens GN=RARS2 PE=1 SV=1	88
303	G3V0E8	Poly(RC) binding protein 2, isoform CRA_f OS=Homo sapiens GN=PCBP2 PE=2 SV=1	88
304	Q14444	Caprin-1 OS=Homo sapiens GN=CAPRIN1 PE=1 SV=2	87
305	Q07352	Zinc finger protein 36, C3H1 type-like 1 OS=Homo sapiens GN=ZFP36L1 PE=1 SV=1	87
306	P16144	Integrin beta-4 OS=Homo sapiens GN=ITGB4 PE=1 SV=5	87
307	P24390	ER lumen protein retaining receptor 1 OS=Homo sapiens GN=KDELR1 PE=1 SV=1	87
308	E5RIU6	Cyclin-dependent kinase 1 (Fragment) OS=Homo sapiens GN=CDK1 PE=2 SV=1	86
309	Q8N5D0	WD and tetratricopeptide repeats protein 1 OS=Homo sapiens GN=WDTC1 PE=1 SV=2	85
310	O94822	E3 ubiquitin-protein ligase listerin OS=Homo sapiens GN=LTN1 PE=1 SV=6	85
311	Q99575	Ribonucleases P/MRP protein subunit POP1 OS=Homo sapiens GN=POP1 PE=1 SV=2	85
312	B4DZI8	Coatomer protein complex, subunit beta 2 (Beta prime), isoform CRA_b OS=Homo sapiens GN=COPB2 PE=2 SV=1	84
313	Q9NR12	PDZ and LIM domain protein 7 OS=Homo sapiens GN=PDLIM7 PE=1 SV=1	84
314	E9PDF6	Unconventional myosin-Ib OS=Homo sapiens GN=MYO1B PE=2 SV=1	84
315	Q96HS1	Serine/threonine-protein phosphatase PGAM5, mitochondrial OS=Homo sapiens GN=PGAM5 PE=1 SV=2	84
316	P35613-3	Isoform 3 of Basigin OS=Homo sapiens GN=BSG	83
317	Q8IZW8	Tensin-4 OS=Homo sapiens GN=TNS4 PE=1 SV=3	83
318	Q14134	Tripartite motif-containing protein 29 OS=Homo sapiens GN=TRIM29 PE=1 SV=2	83
319	E7ETK0	40S ribosomal protein S24 OS=Homo sapiens GN=RPS24 PE=2 SV=1	83
320	P57088	Transmembrane protein 33 OS=Homo sapiens GN=TMEM33 PE=1 SV=2	83
321	Q52LJ0	Protein FAM98B OS=Homo sapiens GN=FAM98B PE=1 SV=1	83
322	Q9Y3U8	60S ribosomal protein L36 OS=Homo sapiens GN=RPL36 PE=1 SV=3	82
323	P62333	26S protease regulatory subunit 10B OS=Homo sapiens GN=PSMC6 PE=1 SV=1	82
324	Q9Y5J9	Mitochondrial import inner membrane translocase subunit Tim8 B OS=Homo sapiens GN=TIMM8B PE=1 SV=1	82
325	C9JCU7	DNA-directed RNA polymerases I, II, and III subunit RPABC3 OS=Homo sapiens GN=POLR2H PE=2 SV=1	81
326	O75533	Splicing factor 3B subunit 1 OS=Homo sapiens GN=SF3B1 PE=1 SV=3	81
327	G3V1V0	Myosin light polypeptide 6 OS=Homo sapiens GN=MYL6 PE=2 SV=1	81
328	Q15393	Splicing factor 3B subunit 3 OS=Homo sapiens GN=SF3B3 PE=1 SV=4	81
329	Q9H1I8	Activating signal cointegrator 1 complex subunit 2 OS=Homo sapiens GN=ASCC2 PE=1 SV=3	81
330	O43242	26S proteasome non-ATPase regulatory subunit 3 OS=Homo sapiens GN=PSMD3 PE=1 SV=2	81
331	Q9HCN8	Stromal cell-derived factor 2-like protein 1 OS=Homo sapiens GN=SDF2L1 PE=1 SV=2	80
332	P10412	Histone H1.4 OS=Homo sapiens GN=HIST1H1E PE=1 SV=2	80
333	O00231	26S proteasome non-ATPase regulatory subunit 11 OS=Homo sapiens GN=PSMD11 PE=1 SV=3	80
334	G3V2Q1	Heterogeneous nuclear ribonucleoproteins C1/C2 OS=Homo sapiens GN=HNRNPC PE=2 SV=1	80
335	H3BLV9	SRSF protein kinase 1 (Fragment) OS=Homo sapiens GN=SRPK1 PE=2 SV=1	80
336	P11387	DNA topoisomerase 1 OS=Homo sapiens GN=TOP1 PE=1 SV=2	80
337	Q96PK6	RNA-binding protein 14 OS=Homo sapiens GN=RBM14 PE=1 SV=2	79
338	Q5T3R7	Nucleolar GTP-binding protein 1 (Fragment) OS=Homo sapiens GN=GTPBP4 PE=2 SV=1	79
339	B3KSQ1	Very-long-chain enoyl-CoA reductase OS=Homo sapiens GN=TECR PE=2 SV=1	79
340	P23246	Splicing factor, proline- and glutamine-rich OS=Homo sapiens GN=SFPQ PE=1 SV=2	79
341	Q9P035	Very-long-chain (3R)-3-hydroxyacyl-[acyl-carrier protein] dehydratase 3 OS=Homo sapiens GN=PTPLAD1 PE=1 SV=2	78
342	Q9UMS4	Pre-mRNA-processing factor 19 OS=Homo sapiens GN=PRPF19 PE=1 SV=1	78
343	P82663	28S ribosomal protein S25, mitochondrial OS=Homo sapiens GN=MRPS25 PE=1 SV=1	78
344	H0Y8C6	Importin-5 (Fragment) OS=Homo sapiens GN=IPO5 PE=4 SV=1	78
345	Q9Y5A9	YTH domain family protein 2 OS=Homo sapiens GN=YTHDF2 PE=1 SV=2	78
346	G3XAD8	Stress-induced-phosphoprotein 1 OS=Homo sapiens GN=STIP1 PE=2 SV=1	78
347	P49327	Fatty acid synthase OS=Homo sapiens GN=FASN PE=1 SV=3	77
348	J3KPF3	4F2 cell-surface antigen heavy chain OS=Homo sapiens GN=SLC3A2 PE=4 SV=1	77
349	B4DE85	Phosphatidylserine synthase 1 OS=Homo sapiens GN=PTDSS1 PE=2 SV=1	77
350	Q9NXV2	BTB/POZ domain-containing protein KCTD5 OS=Homo sapiens GN=KCTD5 PE=1 SV=1	77
351	Q8WWC4	Uncharacterized protein C2orf47, mitochondrial OS=Homo sapiens GN=C2orf47 PE=1 SV=1	77
352	C9J4Z3	60S ribosomal protein L37a OS=Homo sapiens GN=RPL37A PE=2 SV=1	76
353	E7EV71	Latent-transforming growth factor beta-binding protein 1 OS=Homo sapiens GN=LTBP1 PE=2 SV=2	76
354	P26599	Polypyrimidine tract-binding protein 1 OS=Homo sapiens GN=PTBP1 PE=1 SV=1	76
355	G3V1K1	Coiled-coil-helix-coiled-coil-helix domain containing 3, isoform CRA_b OS=Homo sapiens GN=CHCHD3 PE=2 SV=1	75
356	Q9Y2Q9	28S ribosomal protein S28, mitochondrial OS=Homo sapiens GN=MRPS28 PE=1 SV=1	75
357	P81605	Dermcidin OS=Homo sapiens GN=DCD PE=1 SV=2	75
358	P10398	Serine/threonine-protein kinase A-Raf OS=Homo sapiens GN=ARAF PE=1 SV=2	75
359	Q9H9J2	39S ribosomal protein L44, mitochondrial OS=Homo sapiens GN=MRPL44 PE=1 SV=1	74
360	F5H6D0	Mannosyl-oligosaccharide glucosidase OS=Homo sapiens GN=MOGS PE=2 SV=1	74
361	Q8WVX9	Fatty acyl-CoA reductase 1 OS=Homo sapiens GN=FAR1 PE=1 SV=1	74
362	I3L0T6	RNA methyltransferase-like protein 1 OS=Homo sapiens GN=RNMTL1 PE=2 SV=1	74
363	Q96DV4	39S ribosomal protein L38, mitochondrial OS=Homo sapiens GN=MRPL38 PE=1 SV=2	74
364	I3L3P7	40S ribosomal protein S15a OS=Homo sapiens GN=RPS15A PE=2 SV=1	74
365	O75306	NADH dehydrogenase [ubiquinone] iron-sulfur protein 2, mitochondrial OS=Homo sapiens GN=NDUFS2 PE=1 SV=2	74
366	Q04917	14-3-3 protein eta OS=Homo sapiens GN=YWHAH PE=1 SV=4	73
367	J3KQY1	39S ribosomal protein L22, mitochondrial OS=Homo sapiens GN=MRPL22 PE=3 SV=1	73
368	B4DWW1	ADP-ribosylation factor-like protein 1 OS=Homo sapiens GN=ARL1 PE=2 SV=1	73
369	Q6P3W7	SCY1-like protein 2 OS=Homo sapiens GN=SCYL2 PE=1 SV=1	73
370	P82912	28S ribosomal protein S11, mitochondrial OS=Homo sapiens GN=MRPS11 PE=1 SV=2	73
371	Q9Y4W2	Ribosomal biogenesis protein LAS1L OS=Homo sapiens GN=LAS1L PE=1 SV=2	72
372	P08574	Cytochrome c1, heme protein, mitochondrial OS=Homo sapiens GN=CYC1 PE=1 SV=3	72
373	O15084	Serine/threonine-protein phosphatase 6 regulatory ankyrin repeat subunit A OS=Homo sapiens GN=ANKRD28 PE=1 SV=5	72
374	F8WAS3	NADH dehydrogenase [ubiquinone] 1 alpha subcomplex subunit 5 OS=Homo sapiens GN=NDUFA5 PE=2 SV=1	72
375	P05109	Protein S100-A8 OS=Homo sapiens GN=S100A8 PE=1 SV=1	72
376	Q5VY93	Rho guanine nucleotide exchange factor 2 OS=Homo sapiens GN=ARHGEF2 PE=2 SV=1	71
377	H0Y9V9	60S ribosomal protein L9 (Fragment) OS=Homo sapiens GN=RPL9 PE=4 SV=1	71
378	B4E0X2	RAF proto-oncogene serine/threonine-protein kinase OS=Homo sapiens GN=RAF1 PE=2 SV=1	71
379	Q6NZI2	Polymerase I and transcript release factor OS=Homo sapiens GN=PTRF PE=1 SV=1	71
380	E9PF10	Nuclear pore complex protein Nup155 OS=Homo sapiens GN=NUP155 PE=2 SV=1	71
381	Q9NXH8	Torsin-4A OS=Homo sapiens GN=TOR4A PE=1 SV=2	71
382	P41743	Protein kinase C iota type OS=Homo sapiens GN=PRKCI PE=1 SV=2	71
383	B4DVB8	ELAV-like protein 1 OS=Homo sapiens GN=ELAVL1 PE=2 SV=1	71
384	P15924	Desmoplakin OS=Homo sapiens GN=DSP PE=1 SV=3	70
385	G5E9Q4	Interferon-inducible double stranded RNA-dependent protein kinase activator A OS=Homo sapiens GN=PRKRA PE=2 SV=1	70
386	Q5W0B1	RING finger protein 219 OS=Homo sapiens GN=RNF219 PE=1 SV=1	70
387	O15427	Monocarboxylate transporter 4 OS=Homo sapiens GN=SLC16A3 PE=1 SV=1	70
388	F8W181	60S ribosomal protein L6 (Fragment) OS=Homo sapiens GN=RPL6 PE=2 SV=1	70
389	Q8N1F8	Serine/threonine-protein kinase 11-interacting protein OS=Homo sapiens GN=STK11IP PE=1 SV=3	69
390	C9JXC1	Ribonucleoside-diphosphate reductase subunit M2 (Fragment) OS=Homo sapiens GN=RRM2 PE=2 SV=1	69
391	B4DN45	S-adenosylmethionine synthase OS=Homo sapiens GN=MAT2A PE=2 SV=1	69
392	O75477	Erlin-1 OS=Homo sapiens GN=ERLIN1 PE=1 SV=1	69
393	P98175	RNA-binding protein 10 OS=Homo sapiens GN=RBM10 PE=1 SV=3	69
394	J3QRV9	GTPase Era, mitochondrial (Fragment) OS=Homo sapiens GN=ERAL1 PE=4 SV=2	68
395	F8VSE7	Transcription factor E2F7 (Fragment) OS=Homo sapiens GN=E2F7 PE=2 SV=1	68
396	Q08380	Galectin-3-binding protein OS=Homo sapiens GN=LGALS3BP PE=1 SV=1	68
397	K7EJT8	AP-2 complex subunit beta OS=Homo sapiens GN=AP2B1 PE=4 SV=1	68
398	H3BTN5	Pyruvate kinase (Fragment) OS=Homo sapiens GN=PKM PE=2 SV=1	67
399	P35251	Replication factor C subunit 1 OS=Homo sapiens GN=RFC1 PE=1 SV=4	67
400	Q6P158	Putative ATP-dependent RNA helicase DHX57 OS=Homo sapiens GN=DHX57 PE=1 SV=2	66
401	E7EUY5	Single-stranded DNA-binding protein, mitochondrial (Fragment) OS=Homo sapiens GN=SSBP1 PE=4 SV=1	66
402	Q13501	Sequestosome-1 OS=Homo sapiens GN=SQSTM1 PE=1 SV=1	66
403	Q9H2M9	Rab3 GTPase-activating protein non-catalytic subunit OS=Homo sapiens GN=RAB3GAP2 PE=1 SV=1	66
404	F8VNX8	TRAF-type zinc finger domain-containing protein 1 (Fragment) OS=Homo sapiens GN=TRAFD1 PE=2 SV=1	65
405	H0Y368	Dolichol-phosphate mannosyltransferase (Fragment) OS=Homo sapiens GN=DPM1 PE=4 SV=1	65
406	O00425	Insulin-like growth factor 2 mRNA-binding protein 3 OS=Homo sapiens GN=IGF2BP3 PE=1 SV=2	65
407	Q13895	Bystin OS=Homo sapiens GN=BYSL PE=1 SV=3	64
408	O00767	Acyl-CoA desaturase OS=Homo sapiens GN=SCD PE=1 SV=2	64
409	H7C1G6	Autophagy-related protein 9A (Fragment) OS=Homo sapiens GN=ATG9A PE=2 SV=1	64
410	F5H5K9	Neuropathy target esterase OS=Homo sapiens GN=PNPLA6 PE=2 SV=1	63
411	A6NLM8	Translocon-associated protein subunit delta OS=Homo sapiens GN=SSR4 PE=2 SV=1	63
412	J3KNQ3	26S proteasome non-ATPase regulatory subunit 13 OS=Homo sapiens GN=PSMD13 PE=4 SV=1	63
413	B4E241	Serine/arginine-rich-splicing factor 3 OS=Homo sapiens GN=SFRS3 PE=2 SV=1	63
414	B4DXI8	26S proteasome non-ATPase regulatory subunit 7 OS=Homo sapiens GN=PSMD7 PE=2 SV=1	63
415	H0YLA2	Signal recognition particle 14 kDa protein OS=Homo sapiens GN=SRP14 PE=2 SV=1	63
416	Q9Y2W1	Thyroid hormone receptor-associated protein 3 OS=Homo sapiens GN=THRAP3 PE=1 SV=2	63
417	H0YAF8	Guanine nucleotide-binding protein subunit beta-2-like 1 (Fragment) OS=Homo sapiens GN=GNB2L1 PE=4 SV=1	62
418	J3KQE0	SUN domain-containing protein 2 OS=Homo sapiens GN=SUN2 PE=4 SV=1	62
419	O95347	Structural maintenance of chromosomes protein 2 OS=Homo sapiens GN=SMC2 PE=1 SV=2	62
420	Q8IW35	Centrosomal protein of 97 kDa OS=Homo sapiens GN=CEP97 PE=1 SV=1	62
421	J3KPX7	Prohibitin-2 OS=Homo sapiens GN=PHB2 PE=4 SV=1	62
422	P61204	ADP-ribosylation factor 3 OS=Homo sapiens GN=ARF3 PE=1 SV=2	61
423	B4DXZ6	Fragile X mental retardation syndrome-related protein 1 OS=Homo sapiens GN=FXR1 PE=2 SV=1	61
424	Q9H936	Mitochondrial glutamate carrier 1 OS=Homo sapiens GN=SLC25A22 PE=1 SV=1	61
425	M0QXS5	Heterogeneous nuclear ribonucleoprotein L (Fragment) OS=Homo sapiens GN=HNRNPL PE=4 SV=1	61
426	Q9NP73	UDP-N-acetylglucosamine transferase subunit ALG13 homolog OS=Homo sapiens GN=ALG13 PE=1 SV=2	61
427	F8VV32	Lysozyme C OS=Homo sapiens GN=LYZ PE=2 SV=1	61
428	H0Y6E7	RNA-binding motif protein, X chromosome, N-terminally processed (Fragment) OS=Homo sapiens GN=RBMX PE=4 SV=2	61
429	H3BP88	28S ribosomal protein S34, mitochondrial OS=Homo sapiens GN=MRPS34 PE=2 SV=1	61
430	J3QRS3	Myosin regulatory light chain 12A OS=Homo sapiens GN=MYL12A PE=4 SV=1	61
431	Q9NUL7	Probable ATP-dependent RNA helicase DDX28 OS=Homo sapiens GN=DDX28 PE=1 SV=2	60
432	Q1KMD3	Heterogeneous nuclear ribonucleoprotein U-like protein 2 OS=Homo sapiens GN=HNRNPUL2 PE=1 SV=1	60
433	B4E2P2	Translocon-associated protein subunit gamma OS=Homo sapiens GN=SSR3 PE=2 SV=1	60
434	H3BST5	Mitochondrial Rho GTPase 2 (Fragment) OS=Homo sapiens GN=RHOT2 PE=2 SV=2	60
435	J3KNL6	Protein transport protein Sec16A OS=Homo sapiens GN=SEC16A PE=4 SV=1	60
436	Q9H223	EH domain-containing protein 4 OS=Homo sapiens GN=EHD4 PE=1 SV=1	60
437	Q13247	Serine/arginine-rich splicing factor 6 OS=Homo sapiens GN=SRSF6 PE=1 SV=2	59
438	E9PKD5	26S protease regulatory subunit 6A (Fragment) OS=Homo sapiens GN=PSMC3 PE=2 SV=1	59
439	A0FGR8-4	Isoform 4 of Extended synaptotagmin-2 OS=Homo sapiens GN=ESYT2	59
440	G3V0E4	Mitochondrial-processing peptidase subunit beta OS=Homo sapiens GN=PMPCB PE=2 SV=1	59
441	P25788	Proteasome subunit alpha type-3 OS=Homo sapiens GN=PSMA3 PE=1 SV=2	58
442	J3QLG3	Protein flightless-1 homolog OS=Homo sapiens GN=FLII PE=4 SV=1	58
443	Q96CS3	FAS-associated factor 2 OS=Homo sapiens GN=FAF2 PE=1 SV=2	58
444	B4DJ93	Phosphoribosylformylglycinamidine cyclo-ligase OS=Homo sapiens GN=GART PE=2 SV=1	58
445	H0Y9G6	39S ribosomal protein L3, mitochondrial (Fragment) OS=Homo sapiens GN=MRPL3 PE=3 SV=1	57
446	P62314	Small nuclear ribonucleoprotein Sm D1 OS=Homo sapiens GN=SNRPD1 PE=1 SV=1	57
447	D6R991	Matrin-3 (Fragment) OS=Homo sapiens GN=MATR3 PE=2 SV=1	57
448	P49406	39S ribosomal protein L19, mitochondrial OS=Homo sapiens GN=MRPL19 PE=1 SV=2	57
449	P19388	DNA-directed RNA polymerases I, II, and III subunit RPABC1 OS=Homo sapiens GN=POLR2E PE=1 SV=4	57
450	H0YKS4	Annexin (Fragment) OS=Homo sapiens GN=ANXA2 PE=2 SV=1	57
451	J3KN67	Tropomyosin alpha-3 chain OS=Homo sapiens GN=TPM3 PE=3 SV=1	57
452	Q5T447	E3 ubiquitin-protein ligase HECTD3 OS=Homo sapiens GN=HECTD3 PE=1 SV=1	57
453	P20618	Proteasome subunit beta type-1 OS=Homo sapiens GN=PSMB1 PE=1 SV=2	57
454	Q8WVM0	Dimethyladenosine transferase 1, mitochondrial OS=Homo sapiens GN=TFB1M PE=1 SV=1	56
455	P25787	Proteasome subunit alpha type-2 OS=Homo sapiens GN=PSMA2 PE=1 SV=2	56
456	C9JZG1	Eukaryotic translation initiation factor 3 subunit B (Fragment) OS=Homo sapiens GN=EIF3B PE=2 SV=1	56
457	Q13371	Phosducin-like protein OS=Homo sapiens GN=PDCL PE=1 SV=3	56
458	E7EPR3	Gamma-interferon-inducible protein 16 OS=Homo sapiens GN=IFI16 PE=2 SV=1	56
459	O43852	Calumenin OS=Homo sapiens GN=CALU PE=1 SV=2	56
460	Q9UBM7	7-dehydrocholesterol reductase OS=Homo sapiens GN=DHCR7 PE=1 SV=1	56
461	K7EJ81	116 kDa U5 small nuclear ribonucleoprotein component OS=Homo sapiens GN=EFTUD2 PE=4 SV=1	56
462	F8W726	Ubiquitin-associated protein 2-like OS=Homo sapiens GN=UBAP2L PE=2 SV=1	56
463	P28074	Proteasome subunit beta type-5 OS=Homo sapiens GN=PSMB5 PE=1 SV=3	56
464	P60842	Eukaryotic initiation factor 4A-I OS=Homo sapiens GN=EIF4A1 PE=1 SV=1	55
465	G3V0G5	Ankyrin repeat and MYND domain containing 2, isoform CRA_c OS=Homo sapiens GN=ANKMY2 PE=2 SV=1	55
466	A0FGR8	Extended synaptotagmin-2 OS=Homo sapiens GN=ESYT2 PE=1 SV=1	55
467	G5E9Q5	ARP1 actin-related protein 1 homolog B, centractin beta (Yeast), isoform CRA_c OS=Homo sapiens GN=ACTR1B PE=2 SV=1	55
468	Q7L0Y3	Mitochondrial ribonuclease P protein 1 OS=Homo sapiens GN=TRMT10C PE=1 SV=2	55
469	Q08AF3	Schlafen family member 5 OS=Homo sapiens GN=SLFN5 PE=1 SV=1	55
470	Q15645	Pachytene checkpoint protein 2 homolog OS=Homo sapiens GN=TRIP13 PE=1 SV=2	55
471	H0YJS4	Eukaryotic translation initiation factor 2 subunit 1 (Fragment) OS=Homo sapiens GN=EIF2S1 PE=4 SV=1	55
472	O75607	Nucleoplasmin-3 OS=Homo sapiens GN=NPM3 PE=1 SV=3	54
473	P43686	26S protease regulatory subunit 6B OS=Homo sapiens GN=PSMC4 PE=1 SV=2	54
474	P62258	14-3-3 protein epsilon OS=Homo sapiens GN=YWHAE PE=1 SV=1	54
475	Q9UKV8	Protein argonaute-2 OS=Homo sapiens GN=EIF2C2 PE=1 SV=3	54
476	O00232	26S proteasome non-ATPase regulatory subunit 12 OS=Homo sapiens GN=PSMD12 PE=1 SV=3	54
477	P11166	Solute carrier family 2, facilitated glucose transporter member 1 OS=Homo sapiens GN=SLC2A1 PE=1 SV=2	54
478	H7BZL0	MKI67 FHA domain-interacting nucleolar phosphoprotein (Fragment) OS=Homo sapiens GN=MKI67IP PE=2 SV=1	54
479	P0C0S5	Histone H2A.Z OS=Homo sapiens GN=H2AFZ PE=1 SV=2	54
480	Q14669	E3 ubiquitin-protein ligase TRIP12 OS=Homo sapiens GN=TRIP12 PE=1 SV=1	54
481	H0YL69	Proteasome subunit alpha type (Fragment) OS=Homo sapiens GN=PSMA4 PE=2 SV=1	53
482	B4DGU4	Catenin beta-1 OS=Homo sapiens GN=CTNNB1 PE=2 SV=1	53
483	E9PB70	Kinesin-like protein KIF2A OS=Homo sapiens GN=KIF2A PE=2 SV=1	53
484	P46777	60S ribosomal protein L5 OS=Homo sapiens GN=RPL5 PE=1 SV=3	53
485	P41250	Glycine--tRNA ligase OS=Homo sapiens GN=GARS PE=1 SV=3	53
486	G3XAA9	Ribosomal protein S6 kinase alpha-4 OS=Homo sapiens GN=RPS6KA4 PE=2 SV=1	53
487	H3BRE8	RNA polymerase II-associated protein 1 OS=Homo sapiens GN=RPAP1 PE=2 SV=1	53
488	E7EUE1	ATP-binding cassette sub-family D member 3 OS=Homo sapiens GN=ABCD3 PE=2 SV=1	53
489	Q9BRS2	Serine/threonine-protein kinase RIO1 OS=Homo sapiens GN=RIOK1 PE=1 SV=2	52
490	Q96EL2	28S ribosomal protein S24, mitochondrial OS=Homo sapiens GN=MRPS24 PE=1 SV=1	52
491	Q13643	Four and a half LIM domains protein 3 OS=Homo sapiens GN=FHL3 PE=1 SV=4	52
492	Q5JR04	Mov10, Moloney leukemia virus 10, homolog (Mouse), isoform CRA_a OS=Homo sapiens GN=MOV10 PE=2 SV=1	52
493	Q9UBX3	Mitochondrial dicarboxylate carrier OS=Homo sapiens GN=SLC25A10 PE=1 SV=2	52
494	Q08J23	tRNA (cytosine(34)-C(5))-methyltransferase OS=Homo sapiens GN=NSUN2 PE=1 SV=2	52
495	Q96T76	MMS19 nucleotide excision repair protein homolog OS=Homo sapiens GN=MMS19 PE=1 SV=2	52
496	Q5RHS7	Protein S100-A2 OS=Homo sapiens GN=S100A2 PE=2 SV=1	52
497	P28072	Proteasome subunit beta type-6 OS=Homo sapiens GN=PSMB6 PE=1 SV=4	52
498	B1AH77	Ras-related C3 botulinum toxin substrate 2 OS=Homo sapiens GN=RAC2 PE=2 SV=1	52
499	Q13243	Serine/arginine-rich splicing factor 5 OS=Homo sapiens GN=SRSF5 PE=1 SV=1	52
500	B7Z4Q3	Putative RNA-binding protein Luc7-like 2 OS=Homo sapiens GN=LUC7L2 PE=2 SV=1	52
501	Q9UET6	Putative tRNA (cytidine(32)/guanosine(34)-2~-O)-methyltransferase OS=Homo sapiens GN=FTSJ1 PE=1 SV=2	52
502	G3XAA8	La ribonucleoprotein domain family, member 4, isoform CRA_j OS=Homo sapiens GN=LARP4 PE=2 SV=1	51
503	H0YDP7	39S ribosomal protein L49, mitochondrial (Fragment) OS=Homo sapiens GN=MRPL49 PE=4 SV=1	51
504	O95573	Long-chain-fatty-acid--CoA ligase 3 OS=Homo sapiens GN=ACSL3 PE=1 SV=3	51
505	Q9Y3B7	39S ribosomal protein L11, mitochondrial OS=Homo sapiens GN=MRPL11 PE=1 SV=1	51
506	Q9BYD6	39S ribosomal protein L1, mitochondrial OS=Homo sapiens GN=MRPL1 PE=1 SV=2	51
507	D6RBD7	Eukaryotic translation elongation factor 1 epsilon-1 OS=Homo sapiens GN=EEF1E1 PE=2 SV=1	51
508	Q08554	Desmocollin-1 OS=Homo sapiens GN=DSC1 PE=1 SV=2	51
509	O95429	BAG family molecular chaperone regulator 4 OS=Homo sapiens GN=BAG4 PE=1 SV=1	51
510	E9PDU5	WD repeat-containing protein 6 OS=Homo sapiens GN=WDR6 PE=2 SV=1	51
511	Q15149	Plectin OS=Homo sapiens GN=PLEC PE=1 SV=3	51
512	G3XAP5	L-lactate dehydrogenase OS=Homo sapiens GN=LDHC PE=2 SV=1	51
513	I1E4Y6	PERQ amino acid-rich with GYF domain-containing protein 2 OS=Homo sapiens GN=GIGYF2 PE=2 SV=1	51
514	P48059	LIM and senescent cell antigen-like-containing domain protein 1 OS=Homo sapiens GN=LIMS1 PE=1 SV=4	50
515	H3BQG3	Pyruvate dehydrogenase phosphatase regulatory subunit, mitochondrial OS=Homo sapiens GN=PDPR PE=2 SV=1	50
516	O15269	Serine palmitoyltransferase 1 OS=Homo sapiens GN=SPTLC1 PE=1 SV=1	50
517	F5GZS0	Probable ATP-dependent RNA helicase DHX36 OS=Homo sapiens GN=DHX36 PE=2 SV=1	50
518	P28066	Proteasome subunit alpha type-5 OS=Homo sapiens GN=PSMA5 PE=1 SV=3	50
519	Q9NVS2-3	Isoform 3 of 28S ribosomal protein S18a, mitochondrial OS=Homo sapiens GN=MRPS18A	50
520	O43379	WD repeat-containing protein 62 OS=Homo sapiens GN=WDR62 PE=1 SV=4	50
521	Q8N1G4	Leucine-rich repeat-containing protein 47 OS=Homo sapiens GN=LRRC47 PE=1 SV=1	50

## Sheet: Enrich 3 fold score
Protein name	Protein description	Protein Score
P10809	60 kDa heat shock protein, mitochondrial OS=Homo sapiens GN=HSPD1 PE=1 SV=2	10148
Target protein	OS=Homo sapiens GN=MOK1 PE=1 SV=2	4705
P11142	Heat shock cognate 71 kDa protein OS=Homo sapiens GN=HSPA8 PE=1 SV=1	2565
P07437	Tubulin beta chain OS=Homo sapiens GN=TUBB PE=1 SV=2	2287
P68371	Tubulin beta-4B chain OS=Homo sapiens GN=TUBB4B PE=1 SV=1	2111
Q13885	Tubulin beta-2A chain OS=Homo sapiens GN=TUBB2A PE=1 SV=1	1978
Q9BVA1	Tubulin beta-2B chain OS=Homo sapiens GN=TUBB2B PE=1 SV=1	1963
P04350	Tubulin beta-4A chain OS=Homo sapiens GN=TUBB4A PE=1 SV=2	1842
E9PN89	Heat shock cognate 71 kDa protein (Fragment) OS=Homo sapiens GN=HSPA8 PE=2 SV=1	1654
Q9UQ07	MAPK/MAK/MRK overlapping kinase OS=Homo sapiens GN=MOK PE=2 SV=1	1642
E7ERR8	MAPK/MAK/MRK overlapping kinase OS=Homo sapiens GN=MOK PE=2 SV=1	1630
P78371	T-complex protein 1 subunit beta OS=Homo sapiens GN=CCT2 PE=1 SV=4	1369
P68363	Tubulin alpha-1B chain OS=Homo sapiens GN=TUBA1B PE=1 SV=1	1333
F5H5D3	Tubulin alpha-1C chain OS=Homo sapiens GN=TUBA1C PE=2 SV=1	1255
A8MUB1	Tubulin alpha-4A chain OS=Homo sapiens GN=TUBA4A PE=2 SV=1	1234
G3V1U9	Tubulin alpha-1A chain OS=Homo sapiens GN=TUBA1A PE=2 SV=1	1156
P54652	Heat shock-related 70 kDa protein 2 OS=Homo sapiens GN=HSPA2 PE=1 SV=1	1090
A8K7Q2	Heat shock cognate 71 kDa protein OS=Homo sapiens GN=HSPA8 PE=2 SV=1	1071
P50990	T-complex protein 1 subunit theta OS=Homo sapiens GN=CCT8 PE=1 SV=4	842
P49368	T-complex protein 1 subunit gamma OS=Homo sapiens GN=CCT3 PE=1 SV=4	839
Q9BUF5	Tubulin beta-6 chain OS=Homo sapiens GN=TUBB6 PE=1 SV=1	831
H0YM36	MAPK/MAK/MRK overlapping kinase (Fragment) OS=Homo sapiens GN=MOK PE=4 SV=1	815
P50991	T-complex protein 1 subunit delta OS=Homo sapiens GN=CCT4 PE=1 SV=4	757
P17987	T-complex protein 1 subunit alpha OS=Homo sapiens GN=TCP1 PE=1 SV=1	706
P23396	40S ribosomal protein S3 OS=Homo sapiens GN=RPS3 PE=1 SV=2	668
Q00839	Heterogeneous nuclear ribonucleoprotein U OS=Homo sapiens GN=HNRNPU PE=1 SV=6	642
P27708	CAD protein OS=Homo sapiens GN=CAD PE=1 SV=3	627
Q08211	ATP-dependent RNA helicase A OS=Homo sapiens GN=DHX9 PE=1 SV=4	614
P62701	40S ribosomal protein S4, X isoform OS=Homo sapiens GN=RPS4X PE=1 SV=2	609
P19338	Nucleolin OS=Homo sapiens GN=NCL PE=1 SV=3	594
P38646	Stress-70 protein, mitochondrial OS=Homo sapiens GN=HSPA9 PE=1 SV=2	581
Q92598	Heat shock protein 105 kDa OS=Homo sapiens GN=HSPH1 PE=1 SV=1	572
Q99832	T-complex protein 1 subunit eta OS=Homo sapiens GN=CCT7 PE=1 SV=2	556
P61247	40S ribosomal protein S3a OS=Homo sapiens GN=RPS3A PE=1 SV=2	547
P48643	T-complex protein 1 subunit epsilon OS=Homo sapiens GN=CCT5 PE=1 SV=1	542
P11021	78 kDa glucose-regulated protein OS=Homo sapiens GN=HSPA5 PE=1 SV=2	536
P31689	DnaJ homolog subfamily A member 1 OS=Homo sapiens GN=DNAJA1 PE=1 SV=2	529
P34931	Heat shock 70 kDa protein 1-like OS=Homo sapiens GN=HSPA1L PE=1 SV=2	514
P08238	Heat shock protein HSP 90-beta OS=Homo sapiens GN=HSP90AB1 PE=1 SV=4	508
Q9Y265	RuvB-like 1 OS=Homo sapiens GN=RUVBL1 PE=1 SV=1	491
Q9UNE7	E3 ubiquitin-protein ligase CHIP OS=Homo sapiens GN=STUB1 PE=1 SV=2	473
P49411	Elongation factor Tu, mitochondrial OS=Homo sapiens GN=TUFM PE=1 SV=2	458
P12236	ADP/ATP translocase 3 OS=Homo sapiens GN=SLC25A6 PE=1 SV=4	456
P15880	40S ribosomal protein S2 OS=Homo sapiens GN=RPS2 PE=1 SV=2	451
P52272	Heterogeneous nuclear ribonucleoprotein M OS=Homo sapiens GN=HNRNPM PE=1 SV=3	445
P52732	Kinesin-like protein KIF11 OS=Homo sapiens GN=KIF11 PE=1 SV=2	443
P05141	ADP/ATP translocase 2 OS=Homo sapiens GN=SLC25A5 PE=1 SV=7	433
P34932	Heat shock 70 kDa protein 4 OS=Homo sapiens GN=HSPA4 PE=1 SV=4	433
O60884	DnaJ homolog subfamily A member 2 OS=Homo sapiens GN=DNAJA2 PE=1 SV=1	431
O60506	Heterogeneous nuclear ribonucleoprotein Q OS=Homo sapiens GN=SYNCRIP PE=1 SV=2	419
F8VRQ1	Heterogeneous nuclear ribonucleoprotein A1 OS=Homo sapiens GN=HNRNPA1 PE=2 SV=1	408
Q13451	Peptidyl-prolyl cis-trans isomerase FKBP5 OS=Homo sapiens GN=FKBP5 PE=1 SV=2	394
Q8N3C0	Activating signal cointegrator 1 complex subunit 3 OS=Homo sapiens GN=ASCC3 PE=1 SV=3	394
Q13200	26S proteasome non-ATPase regulatory subunit 2 OS=Homo sapiens GN=PSMD2 PE=1 SV=3	389
P07900	Heat shock protein HSP 90-alpha OS=Homo sapiens GN=HSP90AA1 PE=1 SV=5	375
P68104	Elongation factor 1-alpha 1 OS=Homo sapiens GN=EEF1A1 PE=1 SV=1	370
Q9Y230	RuvB-like 2 OS=Homo sapiens GN=RUVBL2 PE=1 SV=3	361
P18124	60S ribosomal protein L7 OS=Homo sapiens GN=RPL7 PE=1 SV=1	356
P62424	60S ribosomal protein L7a OS=Homo sapiens GN=RPL7A PE=1 SV=2	356
P68032	Actin, alpha cardiac muscle 1 OS=Homo sapiens GN=ACTC1 PE=1 SV=1	353
Q99615	DnaJ homolog subfamily C member 7 OS=Homo sapiens GN=DNAJC7 PE=1 SV=2	337
J3KTA4	Probable ATP-dependent RNA helicase DDX5 OS=Homo sapiens GN=DDX5 PE=3 SV=1	336
E9PM13	Heat shock cognate 71 kDa protein (Fragment) OS=Homo sapiens GN=HSPA8 PE=2 SV=1	332
O00571	ATP-dependent RNA helicase DDX3X OS=Homo sapiens GN=DDX3X PE=1 SV=3	331
Q5T6W5	Heterogeneous nuclear ribonucleoprotein K OS=Homo sapiens GN=HNRNPK PE=2 SV=1	328
P62277	40S ribosomal protein S13 OS=Homo sapiens GN=RPS13 PE=1 SV=2	325
O95816	BAG family molecular chaperone regulator 2 OS=Homo sapiens GN=BAG2 PE=1 SV=1	324
P27635	60S ribosomal protein L10 OS=Homo sapiens GN=RPL10 PE=1 SV=4	321
B3KQ59	RuvB-like 2 OS=Homo sapiens GN=RUVBL2 PE=2 SV=1	319
Q5H9R7	Serine/threonine-protein phosphatase 6 regulatory subunit 3 OS=Homo sapiens GN=PPP6R3 PE=1 SV=2	317
P11940	Polyadenylate-binding protein 1 OS=Homo sapiens GN=PABPC1 PE=1 SV=2	316
P12235	ADP/ATP translocase 1 OS=Homo sapiens GN=SLC25A4 PE=1 SV=4	315
Q9UJS0	Calcium-binding mitochondrial carrier protein Aralar2 OS=Homo sapiens GN=SLC25A13 PE=1 SV=2	315
Q9NVI7-2	Isoform 2 of ATPase family AAA domain-containing protein 3A OS=Homo sapiens GN=ATAD3A	303
P62750	60S ribosomal protein L23a OS=Homo sapiens GN=RPL23A PE=1 SV=1	297
H0YK46	40S ribosomal protein S17 (Fragment) OS=Homo sapiens GN=RPS17 PE=2 SV=1	290
Q5SWX8	Protein odr-4 homolog OS=Homo sapiens GN=ODR4 PE=2 SV=1	288
P13639	Elongation factor 2 OS=Homo sapiens GN=EEF2 PE=1 SV=4	282
H7BXY3	Putative ATP-dependent RNA helicase DHX30 OS=Homo sapiens GN=DHX30 PE=2 SV=1	277
Q5SRE5	Nucleoporin NUP188 homolog OS=Homo sapiens GN=NUP188 PE=1 SV=1	277
A5A3E0	POTE ankyrin domain family member F OS=Homo sapiens GN=POTEF PE=1 SV=2	275
I3L1P8	Mitochondrial 2-oxoglutarate/malate carrier protein (Fragment) OS=Homo sapiens GN=SLC25A11 PE=2 SV=1	274
O75746	Calcium-binding mitochondrial carrier protein Aralar1 OS=Homo sapiens GN=SLC25A12 PE=1 SV=2	274
P62979	Ubiquitin-40S ribosomal protein S27a OS=Homo sapiens GN=RPS27A PE=1 SV=2	274
P40227	T-complex protein 1 subunit zeta OS=Homo sapiens GN=CCT6A PE=1 SV=3	273
P62829	60S ribosomal protein L23 OS=Homo sapiens GN=RPL23 PE=1 SV=1	255
P39019	40S ribosomal protein S19 OS=Homo sapiens GN=RPS19 PE=1 SV=2	254
P40429	60S ribosomal protein L13a OS=Homo sapiens GN=RPL13A PE=1 SV=2	253
G8JLB6	Heterogeneous nuclear ribonucleoprotein H OS=Homo sapiens GN=HNRNPH1 PE=2 SV=1	250
J3KRX5	60S ribosomal protein L17 (Fragment) OS=Homo sapiens GN=RPL17 PE=3 SV=1	248
Q5JW30	Double-stranded RNA-binding protein Staufen homolog 1 OS=Homo sapiens GN=STAU1 PE=2 SV=1	243
P05388	60S acidic ribosomal protein P0 OS=Homo sapiens GN=RPLP0 PE=1 SV=1	242
P39023	60S ribosomal protein L3 OS=Homo sapiens GN=RPL3 PE=1 SV=2	241
Q16531	DNA damage-binding protein 1 OS=Homo sapiens GN=DDB1 PE=1 SV=1	241
P62249	40S ribosomal protein S16 OS=Homo sapiens GN=RPS16 PE=1 SV=2	237
P16989	DNA-binding protein A OS=Homo sapiens GN=CSDA PE=1 SV=4	225
P46781	40S ribosomal protein S9 OS=Homo sapiens GN=RPS9 PE=1 SV=3	224
P62241	40S ribosomal protein S8 OS=Homo sapiens GN=RPS8 PE=1 SV=2	224
Q9Y6N5	Sulfide:quinone oxidoreductase, mitochondrial OS=Homo sapiens GN=SQRDL PE=1 SV=1	224
P16615	Sarcoplasmic/endoplasmic reticulum calcium ATPase 2 OS=Homo sapiens GN=ATP2A2 PE=1 SV=1	223
P07996	Thrombospondin-1 OS=Homo sapiens GN=THBS1 PE=1 SV=2	220
F5H136	T-complex protein 1 subunit alpha (Fragment) OS=Homo sapiens GN=TCP1 PE=2 SV=1	219
E5RI99	60S ribosomal protein L30 (Fragment) OS=Homo sapiens GN=RPL30 PE=2 SV=1	217
Q3KQU3	MAP7 domain-containing protein 1 OS=Homo sapiens GN=MAP7D1 PE=1 SV=1	216
P62851	40S ribosomal protein S25 OS=Homo sapiens GN=RPS25 PE=1 SV=1	215
P26373	60S ribosomal protein L13 OS=Homo sapiens GN=RPL13 PE=1 SV=4	213
O95831	Apoptosis-inducing factor 1, mitochondrial OS=Homo sapiens GN=AIFM1 PE=1 SV=1	211
F5H3A1	Sodium/potassium-transporting ATPase subunit alpha-1 OS=Homo sapiens GN=ATP1A1 PE=2 SV=1	210
P61254	60S ribosomal protein L26 OS=Homo sapiens GN=RPL26 PE=1 SV=1	210
P62263	40S ribosomal protein S14 OS=Homo sapiens GN=RPS14 PE=1 SV=3	209
Q5T9A4	ATPase family AAA domain-containing protein 3B OS=Homo sapiens GN=ATAD3B PE=1 SV=1	208
O75489	NADH dehydrogenase [ubiquinone] iron-sulfur protein 3, mitochondrial OS=Homo sapiens GN=NDUFS3 PE=1 SV=1	204
Q96P70	Importin-9 OS=Homo sapiens GN=IPO9 PE=1 SV=3	203
K7ENP3	ATP synthase subunit alpha OS=Homo sapiens GN=ATP5A1 PE=3 SV=1	202
P62081	40S ribosomal protein S7 OS=Homo sapiens GN=RPS7 PE=1 SV=1	202
Q9Y224	UPF0568 protein C14orf166 OS=Homo sapiens GN=C14orf166 PE=1 SV=1	202
P62913	60S ribosomal protein L11 OS=Homo sapiens GN=RPL11 PE=1 SV=2	200
O15355	Protein phosphatase 1G OS=Homo sapiens GN=PPM1G PE=1 SV=1	199
Q07065	Cytoskeleton-associated protein 4 OS=Homo sapiens GN=CKAP4 PE=1 SV=2	198
H7C2U0	T-complex protein 1 subunit theta (Fragment) OS=Homo sapiens GN=CCT8 PE=4 SV=1	197
O95373	Importin-7 OS=Homo sapiens GN=IPO7 PE=1 SV=1	196
P30050	60S ribosomal protein L12 OS=Homo sapiens GN=RPL12 PE=1 SV=1	190
P62280	40S ribosomal protein S11 OS=Homo sapiens GN=RPS11 PE=1 SV=3	190
Q6ZRV2	Protein FAM83H OS=Homo sapiens GN=FAM83H PE=1 SV=3	190
Q9UL15	BAG family molecular chaperone regulator 5 OS=Homo sapiens GN=BAG5 PE=1 SV=1	190
Q9UQ07-4	Isoform 4 of MAPK/MAK/MRK overlapping kinase OS=Homo sapiens GN=MOK	190
C9J2Y9	DNA-directed RNA polymerase OS=Homo sapiens GN=POLR2B PE=2 SV=2	189
Q6PKG0	La-related protein 1 OS=Homo sapiens GN=LARP1 PE=1 SV=2	187
P25205	DNA replication licensing factor MCM3 OS=Homo sapiens GN=MCM3 PE=1 SV=3	186
P35998	26S protease regulatory subunit 7 OS=Homo sapiens GN=PSMC2 PE=1 SV=3	185
E7EPB3	60S ribosomal protein L14 OS=Homo sapiens GN=RPL14 PE=2 SV=1	183
F8VZS0	60S acidic ribosomal protein P0 (Fragment) OS=Homo sapiens GN=RPLP0 PE=2 SV=1	183
M0R117	60S ribosomal protein L18a OS=Homo sapiens GN=RPL18A PE=4 SV=1	183
P62906	60S ribosomal protein L10a OS=Homo sapiens GN=RPL10A PE=1 SV=2	183
P67809	Nuclease-sensitive element-binding protein 1 OS=Homo sapiens GN=YBX1 PE=1 SV=3	182
G5E9M5	Interleukin enhancer binding factor 3, 90kDa, isoform CRA_b OS=Homo sapiens GN=ILF3 PE=2 SV=1	181
Q13151	Heterogeneous nuclear ribonucleoprotein A0 OS=Homo sapiens GN=HNRNPA0 PE=1 SV=1	180
Q9NZB2	Constitutive coactivator of PPAR-gamma-like protein 1 OS=Homo sapiens GN=FAM120A PE=1 SV=2	180
P46778	60S ribosomal protein L21 OS=Homo sapiens GN=RPL21 PE=1 SV=2	177
Q9BQA1	Methylosome protein 50 OS=Homo sapiens GN=WDR77 PE=1 SV=1	177
C9JNW5	60S ribosomal protein L24 OS=Homo sapiens GN=RPL24 PE=2 SV=1	175
O43390	Heterogeneous nuclear ribonucleoprotein R OS=Homo sapiens GN=HNRNPR PE=1 SV=1	175
P63173	60S ribosomal protein L38 OS=Homo sapiens GN=RPL38 PE=1 SV=2	174
B4DRT2	28S ribosomal protein S27, mitochondrial OS=Homo sapiens GN=MRPS27 PE=2 SV=1	173
H0Y5F5	Polyadenylate-binding protein 4 (Fragment) OS=Homo sapiens GN=PABPC4 PE=4 SV=1	173
P23458	Tyrosine-protein kinase JAK1 OS=Homo sapiens GN=JAK1 PE=1 SV=2	173
Q9Y3D9	28S ribosomal protein S23, mitochondrial OS=Homo sapiens GN=MRPS23 PE=1 SV=2	173
P63151	Serine/threonine-protein phosphatase 2A 55 kDa regulatory subunit B alpha isoform OS=Homo sapiens GN=PPP2R2A PE=1 SV=1	170
P46783	40S ribosomal protein S10 OS=Homo sapiens GN=RPS10 PE=1 SV=1	168
E7ES43	Heat shock 70 kDa protein 4L OS=Homo sapiens GN=HSPA4L PE=2 SV=2	167
Q96TC7	Regulator of microtubule dynamics protein 3 OS=Homo sapiens GN=RMDN3 PE=1 SV=2	167
E9PKZ0	60S ribosomal protein L8 OS=Homo sapiens GN=RPL8 PE=2 SV=1	165
P62266	40S ribosomal protein S23 OS=Homo sapiens GN=RPS23 PE=1 SV=3	165
Q99729-3	Isoform 3 of Heterogeneous nuclear ribonucleoprotein A/B OS=Homo sapiens GN=HNRNPAB	165
P25398	40S ribosomal protein S12 OS=Homo sapiens GN=RPS12 PE=1 SV=3	161
Q9UNX3	60S ribosomal protein L26-like 1 OS=Homo sapiens GN=RPL26L1 PE=1 SV=1	160
B0YJC4	Vimentin OS=Homo sapiens GN=VIM PE=2 SV=1	159
P46779	60S ribosomal protein L28 OS=Homo sapiens GN=RPL28 PE=1 SV=3	159
Q01650	Large neutral amino acids transporter small subunit 1 OS=Homo sapiens GN=SLC7A5 PE=1 SV=2	159
P30153	Serine/threonine-protein phosphatase 2A 65 kDa regulatory subunit A alpha isoform OS=Homo sapiens GN=PPP2R1A PE=1 SV=4	158
H0YA55	Serum albumin (Fragment) OS=Homo sapiens GN=ALB PE=4 SV=1	154
P05387	60S acidic ribosomal protein P2 OS=Homo sapiens GN=RPLP2 PE=1 SV=1	153
P42677	40S ribosomal protein S27 OS=Homo sapiens GN=RPS27 PE=1 SV=3	152
Q13283	Ras GTPase-activating protein-binding protein 1 OS=Homo sapiens GN=G3BP1 PE=1 SV=1	152
Q92499	ATP-dependent RNA helicase DDX1 OS=Homo sapiens GN=DDX1 PE=1 SV=2	151
Q7Z2W4	Zinc finger CCCH-type antiviral protein 1 OS=Homo sapiens GN=ZC3HAV1 PE=1 SV=3	149
P35268	60S ribosomal protein L22 OS=Homo sapiens GN=RPL22 PE=1 SV=2	148
O00743	Serine/threonine-protein phosphatase 6 catalytic subunit OS=Homo sapiens GN=PPP6C PE=1 SV=1	146
Q99460	26S proteasome non-ATPase regulatory subunit 1 OS=Homo sapiens GN=PSMD1 PE=1 SV=2	146
F8WCY5	Reticulocalbin-2 OS=Homo sapiens GN=RCN2 PE=2 SV=1	145
P17655	Calpain-2 catalytic subunit OS=Homo sapiens GN=CAPN2 PE=1 SV=6	145
P82933	28S ribosomal protein S9, mitochondrial OS=Homo sapiens GN=MRPS9 PE=1 SV=2	145
P53621	Coatomer subunit alpha OS=Homo sapiens GN=COPA PE=1 SV=2	144
P62987	Ubiquitin-60S ribosomal protein L40 OS=Homo sapiens GN=UBA52 PE=1 SV=2	144
Q9BRX2	Protein pelota homolog OS=Homo sapiens GN=PELO PE=1 SV=2	142
B9A067	Mitochondrial inner membrane protein OS=Homo sapiens GN=IMMT PE=2 SV=2	137
P07814	Bifunctional glutamate/proline--tRNA ligase OS=Homo sapiens GN=EPRS PE=1 SV=5	137
Q8WXX5	DnaJ homolog subfamily C member 9 OS=Homo sapiens GN=DNAJC9 PE=1 SV=1	136
P41091	Eukaryotic translation initiation factor 2 subunit 3 OS=Homo sapiens GN=EIF2S3 PE=1 SV=3	135
P82673	28S ribosomal protein S35, mitochondrial OS=Homo sapiens GN=MRPS35 PE=1 SV=1	135
B7Z4B8	Heterogeneous nuclear ribonucleoprotein U-like protein 1 OS=Homo sapiens GN=HNRNPUL1 PE=2 SV=1	134
Q8NCA5	Protein FAM98A OS=Homo sapiens GN=FAM98A PE=1 SV=1	134
Q9NZN4	EH domain-containing protein 2 OS=Homo sapiens GN=EHD2 PE=1 SV=2	134
J3QLS3	28S ribosomal protein S7, mitochondrial OS=Homo sapiens GN=MRPS7 PE=4 SV=1	133
P13489	Ribonuclease inhibitor OS=Homo sapiens GN=RNH1 PE=1 SV=2	133
P63104	14-3-3 protein zeta/delta OS=Homo sapiens GN=YWHAZ PE=1 SV=1	133
Q96EY7	Pentatricopeptide repeat domain-containing protein 3, mitochondrial OS=Homo sapiens GN=PTCD3 PE=1 SV=3	132
P04843	Dolichyl-diphosphooligosaccharide--protein glycosyltransferase subunit 1 OS=Homo sapiens GN=RPN1 PE=1 SV=1	131
P23528	Cofilin-1 OS=Homo sapiens GN=CFL1 PE=1 SV=3	131
P46940	Ras GTPase-activating-like protein IQGAP1 OS=Homo sapiens GN=IQGAP1 PE=1 SV=1	131
E9PLL6	60S ribosomal protein L27a OS=Homo sapiens GN=RPL27A PE=2 SV=1	130
P42704	Leucine-rich PPR motif-containing protein, mitochondrial OS=Homo sapiens GN=LRPPRC PE=1 SV=3	130
P62854	40S ribosomal protein S26 OS=Homo sapiens GN=RPS26 PE=1 SV=3	130
G5E9V5	28S ribosomal protein S22, mitochondrial OS=Homo sapiens GN=MRPS22 PE=2 SV=1	128
Q9BVP2	Guanine nucleotide-binding protein-like 3 OS=Homo sapiens GN=GNL3 PE=1 SV=2	128
G3V5Z7	Proteasome subunit alpha type OS=Homo sapiens GN=PSMA6 PE=2 SV=1	126
P31946	14-3-3 protein beta/alpha OS=Homo sapiens GN=YWHAB PE=1 SV=3	126
Q12905	Interleukin enhancer-binding factor 2 OS=Homo sapiens GN=ILF2 PE=1 SV=2	126
Q86VP6	Cullin-associated NEDD8-dissociated protein 1 OS=Homo sapiens GN=CAND1 PE=1 SV=2	126
B4DP11	Prostaglandin E synthase 3 OS=Homo sapiens GN=PTGES3 PE=2 SV=1	125
K7EMH1	60S ribosomal protein L22 (Fragment) OS=Homo sapiens GN=RPL22 PE=4 SV=1	125
P06899	Histone H2B type 1-J OS=Homo sapiens GN=HIST1H2BJ PE=1 SV=3	125
Q00325	Phosphate carrier protein, mitochondrial OS=Homo sapiens GN=SLC25A3 PE=1 SV=2	123
Q96PY5	Formin-like protein 2 OS=Homo sapiens GN=FMNL2 PE=1 SV=3	123
B0YJ33	Laminin alpha-3 chain variant 2 OS=Homo sapiens GN=LAMA3 PE=2 SV=1	122
Q7L7V1	Putative pre-mRNA-splicing factor ATP-dependent RNA helicase DHX32 OS=Homo sapiens GN=DHX32 PE=1 SV=1	122
G5E9Q2	Cold shock domain containing E1, RNA-binding, isoform CRA_d OS=Homo sapiens GN=CSDE1 PE=2 SV=1	120
H0Y8C2	60S ribosomal protein L22-like 1 (Fragment) OS=Homo sapiens GN=RPL22L1 PE=2 SV=1	120
D3YTB1	60S ribosomal protein L32 (Fragment) OS=Homo sapiens GN=RPL32 PE=2 SV=1	119
Q9UN86	Ras GTPase-activating protein-binding protein 2 OS=Homo sapiens GN=G3BP2 PE=1 SV=2	119
E7EWI9	Heterogeneous nuclear ribonucleoprotein A3 OS=Homo sapiens GN=HNRNPA3 PE=2 SV=1	118
F8W930	Insulin-like growth factor 2 mRNA-binding protein 2 OS=Homo sapiens GN=IGF2BP2 PE=2 SV=1	118
H3BLZ8	Probable ATP-dependent RNA helicase DDX17 OS=Homo sapiens GN=DDX17 PE=2 SV=1	118
P09543	2~,3~-cyclic-nucleotide 3~-phosphodiesterase OS=Homo sapiens GN=CNP PE=1 SV=2	118
P18077	60S ribosomal protein L35a OS=Homo sapiens GN=RPL35A PE=1 SV=2	118
P36542	ATP synthase subunit gamma, mitochondrial OS=Homo sapiens GN=ATP5C1 PE=1 SV=1	116
P50402	Emerin OS=Homo sapiens GN=EMD PE=1 SV=1	116
Q96TA2	ATP-dependent zinc metalloprotease YME1L1 OS=Homo sapiens GN=YME1L1 PE=1 SV=2	116
Q9HCN4	GPN-loop GTPase 1 OS=Homo sapiens GN=GPN1 PE=1 SV=1	115
Q92900	Regulator of nonsense transcripts 1 OS=Homo sapiens GN=UPF1 PE=1 SV=2	113
Q9UPN7	Serine/threonine-protein phosphatase 6 regulatory subunit 1 OS=Homo sapiens GN=PPP6R1 PE=1 SV=5	113
Q9Y678	Coatomer subunit gamma-1 OS=Homo sapiens GN=COPG1 PE=1 SV=1	113
C9J2C4	DnaJ homolog subfamily B member 6 (Fragment) OS=Homo sapiens GN=DNAJB6 PE=2 SV=1	112
P53618	Coatomer subunit beta OS=Homo sapiens GN=COPB1 PE=1 SV=3	112
P62195	26S protease regulatory subunit 8 OS=Homo sapiens GN=PSMC5 PE=1 SV=1	112
Q9Y399	28S ribosomal protein S2, mitochondrial OS=Homo sapiens GN=MRPS2 PE=1 SV=1	112
B4DNJ6	Serine-threonine kinase receptor-associated protein OS=Homo sapiens GN=STRAP PE=2 SV=1	111
Q969Q0	60S ribosomal protein L36a-like OS=Homo sapiens GN=RPL36AL PE=1 SV=3	110
Q9Y6Y0	Influenza virus NS1A-binding protein OS=Homo sapiens GN=IVNS1ABP PE=1 SV=3	110
H0YMV8	40S ribosomal protein S27 OS=Homo sapiens GN=RPS27L PE=2 SV=1	109
O95782	AP-2 complex subunit alpha-1 OS=Homo sapiens GN=AP2A1 PE=1 SV=3	109
Q14103	Heterogeneous nuclear ribonucleoprotein D0 OS=Homo sapiens GN=HNRNPD PE=1 SV=1	109
B4DP62	Solute carrier family 25 (Mitochondrial carrier; citrate transporter), member 1, isoform CRA_b OS=Homo sapiens GN=SLC25A1 PE=2 SV=1	108
Q9NR30	Nucleolar RNA helicase 2 OS=Homo sapiens GN=DDX21 PE=1 SV=5	108
O43143	Putative pre-mRNA-splicing factor ATP-dependent RNA helicase DHX15 OS=Homo sapiens GN=DHX15 PE=1 SV=2	107
P42766	60S ribosomal protein L35 OS=Homo sapiens GN=RPL35 PE=1 SV=2	106
P53985	Monocarboxylate transporter 1 OS=Homo sapiens GN=SLC16A1 PE=1 SV=3	106
Q12797	Aspartyl/asparaginyl beta-hydroxylase OS=Homo sapiens GN=ASPH PE=1 SV=3	106
Q14974	Importin subunit beta-1 OS=Homo sapiens GN=KPNB1 PE=1 SV=2	103
H0Y5B4	60S ribosomal protein L36a (Fragment) OS=Homo sapiens GN=RPL36A PE=3 SV=1	101
H3BVG0	Nuclear pore complex protein Nup93 OS=Homo sapiens GN=NUP93 PE=2 SV=1	101
B0YIW6	Archain 1, isoform CRA_a OS=Homo sapiens GN=ARCN1 PE=2 SV=1	100
H0YDU8	Serine/threonine-protein phosphatase (Fragment) OS=Homo sapiens GN=PPP5C PE=3 SV=1	100
O60783	28S ribosomal protein S14, mitochondrial OS=Homo sapiens GN=MRPS14 PE=1 SV=1	100
Q9Y676	28S ribosomal protein S18b, mitochondrial OS=Homo sapiens GN=MRPS18B PE=1 SV=1	100
F5H874	Activating signal cointegrator 1 complex subunit 1 OS=Homo sapiens GN=ASCC1 PE=2 SV=1	99
Q15365	Poly(rC)-binding protein 1 OS=Homo sapiens GN=PCBP1 PE=1 SV=2	99
Q96EK5	KIF1-binding protein OS=Homo sapiens GN=KIAA1279 PE=1 SV=1	99
P60981	Destrin OS=Homo sapiens GN=DSTN PE=1 SV=3	98
P61353	60S ribosomal protein L27 OS=Homo sapiens GN=RPL27 PE=1 SV=2	98
K7ELQ0	39S ribosomal protein L4, mitochondrial OS=Homo sapiens GN=MRPL4 PE=4 SV=1	97
P17812	CTP synthase 1 OS=Homo sapiens GN=CTPS1 PE=1 SV=2	97
Q3ZCQ8	Mitochondrial import inner membrane translocase subunit TIM50 OS=Homo sapiens GN=TIMM50 PE=1 SV=2	96
Q96EY1	DnaJ homolog subfamily A member 3, mitochondrial OS=Homo sapiens GN=DNAJA3 PE=1 SV=2	96
Q8NB46	Serine/threonine-protein phosphatase 6 regulatory ankyrin repeat subunit C OS=Homo sapiens GN=ANKRD52 PE=1 SV=3	95
E7ESU4	N-acetyltransferase 10 OS=Homo sapiens GN=NAT10 PE=2 SV=1	94
J3KQ73	Peptidyl-prolyl cis-trans isomerase FKBP8 OS=Homo sapiens GN=FKBP8 PE=4 SV=1	94
K7ELC2	40S ribosomal protein S15 OS=Homo sapiens GN=RPS15 PE=3 SV=1	94
P51398	28S ribosomal protein S29, mitochondrial OS=Homo sapiens GN=DAP3 PE=1 SV=1	94
Q5T653	39S ribosomal protein L2, mitochondrial OS=Homo sapiens GN=MRPL2 PE=1 SV=2	94
Q9NUQ6	SPATS2-like protein OS=Homo sapiens GN=SPATS2L PE=1 SV=2	94
P25786	Proteasome subunit alpha type-1 OS=Homo sapiens GN=PSMA1 PE=1 SV=1	93
C9JPM4	ADP-ribosylation factor 4 (Fragment) OS=Homo sapiens GN=ARF4 PE=2 SV=1	92
P82914	28S ribosomal protein S15, mitochondrial OS=Homo sapiens GN=MRPS15 PE=1 SV=1	92
Q9Y295	Developmentally-regulated GTP-binding protein 1 OS=Homo sapiens GN=DRG1 PE=1 SV=1	92
P62273	40S ribosomal protein S29 OS=Homo sapiens GN=RPS29 PE=1 SV=2	91
Q58FF6	Putative heat shock protein HSP 90-beta 4 OS=Homo sapiens GN=HSP90AB4P PE=5 SV=1	91
Q8NF37	Lysophosphatidylcholine acyltransferase 1 OS=Homo sapiens GN=LPCAT1 PE=1 SV=2	91
Q9UKA4	A-kinase anchor protein 11 OS=Homo sapiens GN=AKAP11 PE=1 SV=1	91
Q9H6T3	RNA polymerase II-associated protein 3 OS=Homo sapiens GN=RPAP3 PE=1 SV=2	90
Q9UKD2	mRNA turnover protein 4 homolog OS=Homo sapiens GN=MRTO4 PE=1 SV=2	90
E5RHW4	Erlin-2 (Fragment) OS=Homo sapiens GN=ERLIN2 PE=2 SV=1	89
P82675	28S ribosomal protein S5, mitochondrial OS=Homo sapiens GN=MRPS5 PE=1 SV=2	89
P40939	Trifunctional enzyme subunit alpha, mitochondrial OS=Homo sapiens GN=HADHA PE=1 SV=2	88
Q5T160	Probable arginine--tRNA ligase, mitochondrial OS=Homo sapiens GN=RARS2 PE=1 SV=1	88
Q9H0S4	Probable ATP-dependent RNA helicase DDX47 OS=Homo sapiens GN=DDX47 PE=1 SV=1	88
P16144	Integrin beta-4 OS=Homo sapiens GN=ITGB4 PE=1 SV=5	87
P24390	ER lumen protein retaining receptor 1 OS=Homo sapiens GN=KDELR1 PE=1 SV=1	87
Q07352	Zinc finger protein 36, C3H1 type-like 1 OS=Homo sapiens GN=ZFP36L1 PE=1 SV=1	87
Q14444	Caprin-1 OS=Homo sapiens GN=CAPRIN1 PE=1 SV=2	87
E5RIU6	Cyclin-dependent kinase 1 (Fragment) OS=Homo sapiens GN=CDK1 PE=2 SV=1	86
O94822	E3 ubiquitin-protein ligase listerin OS=Homo sapiens GN=LTN1 PE=1 SV=6	85
Q8N5D0	WD and tetratricopeptide repeats protein 1 OS=Homo sapiens GN=WDTC1 PE=1 SV=2	85
Q99575	Ribonucleases P/MRP protein subunit POP1 OS=Homo sapiens GN=POP1 PE=1 SV=2	85
B4DZI8	Coatomer protein complex, subunit beta 2 (Beta prime), isoform CRA_b OS=Homo sapiens GN=COPB2 PE=2 SV=1	84
Q96HS1	Serine/threonine-protein phosphatase PGAM5, mitochondrial OS=Homo sapiens GN=PGAM5 PE=1 SV=2	84
Q9NR12	PDZ and LIM domain protein 7 OS=Homo sapiens GN=PDLIM7 PE=1 SV=1	84
E7ETK0	40S ribosomal protein S24 OS=Homo sapiens GN=RPS24 PE=2 SV=1	83
P35613-3	Isoform 3 of Basigin OS=Homo sapiens GN=BSG	83
P57088	Transmembrane protein 33 OS=Homo sapiens GN=TMEM33 PE=1 SV=2	83
Q52LJ0	Protein FAM98B OS=Homo sapiens GN=FAM98B PE=1 SV=1	83
Q8IZW8	Tensin-4 OS=Homo sapiens GN=TNS4 PE=1 SV=3	83
P62333	26S protease regulatory subunit 10B OS=Homo sapiens GN=PSMC6 PE=1 SV=1	82
Q9Y3U8	60S ribosomal protein L36 OS=Homo sapiens GN=RPL36 PE=1 SV=3	82
Q9Y5J9	Mitochondrial import inner membrane translocase subunit Tim8 B OS=Homo sapiens GN=TIMM8B PE=1 SV=1	82
C9JCU7	DNA-directed RNA polymerases I, II, and III subunit RPABC3 OS=Homo sapiens GN=POLR2H PE=2 SV=1	81
G3V1V0	Myosin light polypeptide 6 OS=Homo sapiens GN=MYL6 PE=2 SV=1	81
O43242	26S proteasome non-ATPase regulatory subunit 3 OS=Homo sapiens GN=PSMD3 PE=1 SV=2	81
O75533	Splicing factor 3B subunit 1 OS=Homo sapiens GN=SF3B1 PE=1 SV=3	81
Q15393	Splicing factor 3B subunit 3 OS=Homo sapiens GN=SF3B3 PE=1 SV=4	81
Q9H1I8	Activating signal cointegrator 1 complex subunit 2 OS=Homo sapiens GN=ASCC2 PE=1 SV=3	81
G3V2Q1	Heterogeneous nuclear ribonucleoproteins C1/C2 OS=Homo sapiens GN=HNRNPC PE=2 SV=1	80
H3BLV9	SRSF protein kinase 1 (Fragment) OS=Homo sapiens GN=SRPK1 PE=2 SV=1	80
O00231	26S proteasome non-ATPase regulatory subunit 11 OS=Homo sapiens GN=PSMD11 PE=1 SV=3	80
P11387	DNA topoisomerase 1 OS=Homo sapiens GN=TOP1 PE=1 SV=2	80
Q9HCN8	Stromal cell-derived factor 2-like protein 1 OS=Homo sapiens GN=SDF2L1 PE=1 SV=2	80
B3KSQ1	Very-long-chain enoyl-CoA reductase OS=Homo sapiens GN=TECR PE=2 SV=1	79
Q5T3R7	Nucleolar GTP-binding protein 1 (Fragment) OS=Homo sapiens GN=GTPBP4 PE=2 SV=1	79
G3XAD8	Stress-induced-phosphoprotein 1 OS=Homo sapiens GN=STIP1 PE=2 SV=1	78
H0Y8C6	Importin-5 (Fragment) OS=Homo sapiens GN=IPO5 PE=4 SV=1	78
P82663	28S ribosomal protein S25, mitochondrial OS=Homo sapiens GN=MRPS25 PE=1 SV=1	78
Q9P035	Very-long-chain (3R)-3-hydroxyacyl-[acyl-carrier protein] dehydratase 3 OS=Homo sapiens GN=PTPLAD1 PE=1 SV=2	78
Q9UMS4	Pre-mRNA-processing factor 19 OS=Homo sapiens GN=PRPF19 PE=1 SV=1	78
Q9Y5A9	YTH domain family protein 2 OS=Homo sapiens GN=YTHDF2 PE=1 SV=2	78
B4DE85	Phosphatidylserine synthase 1 OS=Homo sapiens GN=PTDSS1 PE=2 SV=1	77
J3KPF3	4F2 cell-surface antigen heavy chain OS=Homo sapiens GN=SLC3A2 PE=4 SV=1	77
P49327	Fatty acid synthase OS=Homo sapiens GN=FASN PE=1 SV=3	77
Q8WWC4	Uncharacterized protein C2orf47, mitochondrial OS=Homo sapiens GN=C2orf47 PE=1 SV=1	77
Q9NXV2	BTB/POZ domain-containing protein KCTD5 OS=Homo sapiens GN=KCTD5 PE=1 SV=1	77
C9J4Z3	60S ribosomal protein L37a OS=Homo sapiens GN=RPL37A PE=2 SV=1	76
E7EV71	Latent-transforming growth factor beta-binding protein 1 OS=Homo sapiens GN=LTBP1 PE=2 SV=2	76
P26599	Polypyrimidine tract-binding protein 1 OS=Homo sapiens GN=PTBP1 PE=1 SV=1	76
G3V1K1	Coiled-coil-helix-coiled-coil-helix domain containing 3, isoform CRA_b OS=Homo sapiens GN=CHCHD3 PE=2 SV=1	75
P10398	Serine/threonine-protein kinase A-Raf OS=Homo sapiens GN=ARAF PE=1 SV=2	75
Q9Y2Q9	28S ribosomal protein S28, mitochondrial OS=Homo sapiens GN=MRPS28 PE=1 SV=1	75
F5H6D0	Mannosyl-oligosaccharide glucosidase OS=Homo sapiens GN=MOGS PE=2 SV=1	74
I3L0T6	RNA methyltransferase-like protein 1 OS=Homo sapiens GN=RNMTL1 PE=2 SV=1	74
O75306	NADH dehydrogenase [ubiquinone] iron-sulfur protein 2, mitochondrial OS=Homo sapiens GN=NDUFS2 PE=1 SV=2	74
Q8WVX9	Fatty acyl-CoA reductase 1 OS=Homo sapiens GN=FAR1 PE=1 SV=1	74
Q96DV4	39S ribosomal protein L38, mitochondrial OS=Homo sapiens GN=MRPL38 PE=1 SV=2	74
Q9H9J2	39S ribosomal protein L44, mitochondrial OS=Homo sapiens GN=MRPL44 PE=1 SV=1	74
B4DWW1	ADP-ribosylation factor-like protein 1 OS=Homo sapiens GN=ARL1 PE=2 SV=1	73
J3KQY1	39S ribosomal protein L22, mitochondrial OS=Homo sapiens GN=MRPL22 PE=3 SV=1	73
P82912	28S ribosomal protein S11, mitochondrial OS=Homo sapiens GN=MRPS11 PE=1 SV=2	73
Q04917	14-3-3 protein eta OS=Homo sapiens GN=YWHAH PE=1 SV=4	73
F8WAS3	NADH dehydrogenase [ubiquinone] 1 alpha subcomplex subunit 5 OS=Homo sapiens GN=NDUFA5 PE=2 SV=1	72
O15084	Serine/threonine-protein phosphatase 6 regulatory ankyrin repeat subunit A OS=Homo sapiens GN=ANKRD28 PE=1 SV=5	72
P05109	Protein S100-A8 OS=Homo sapiens GN=S100A8 PE=1 SV=1	72
P08574	Cytochrome c1, heme protein, mitochondrial OS=Homo sapiens GN=CYC1 PE=1 SV=3	72
Q9Y4W2	Ribosomal biogenesis protein LAS1L OS=Homo sapiens GN=LAS1L PE=1 SV=2	72
B4DVB8	ELAV-like protein 1 OS=Homo sapiens GN=ELAVL1 PE=2 SV=1	71
B4E0X2	RAF proto-oncogene serine/threonine-protein kinase OS=Homo sapiens GN=RAF1 PE=2 SV=1	71
E9PF10	Nuclear pore complex protein Nup155 OS=Homo sapiens GN=NUP155 PE=2 SV=1	71
H0Y9V9	60S ribosomal protein L9 (Fragment) OS=Homo sapiens GN=RPL9 PE=4 SV=1	71
P41743	Protein kinase C iota type OS=Homo sapiens GN=PRKCI PE=1 SV=2	71
Q5VY93	Rho guanine nucleotide exchange factor 2 OS=Homo sapiens GN=ARHGEF2 PE=2 SV=1	71
Q6NZI2	Polymerase I and transcript release factor OS=Homo sapiens GN=PTRF PE=1 SV=1	71
Q9NXH8	Torsin-4A OS=Homo sapiens GN=TOR4A PE=1 SV=2	71
F8W181	60S ribosomal protein L6 (Fragment) OS=Homo sapiens GN=RPL6 PE=2 SV=1	70
G5E9Q4	Interferon-inducible double stranded RNA-dependent protein kinase activator A OS=Homo sapiens GN=PRKRA PE=2 SV=1	70
O15427	Monocarboxylate transporter 4 OS=Homo sapiens GN=SLC16A3 PE=1 SV=1	70
Q5W0B1	RING finger protein 219 OS=Homo sapiens GN=RNF219 PE=1 SV=1	70
B4DN45	S-adenosylmethionine synthase OS=Homo sapiens GN=MAT2A PE=2 SV=1	69
C9JXC1	Ribonucleoside-diphosphate reductase subunit M2 (Fragment) OS=Homo sapiens GN=RRM2 PE=2 SV=1	69
O75477	Erlin-1 OS=Homo sapiens GN=ERLIN1 PE=1 SV=1	69
P98175	RNA-binding protein 10 OS=Homo sapiens GN=RBM10 PE=1 SV=3	69
Q8N1F8	Serine/threonine-protein kinase 11-interacting protein OS=Homo sapiens GN=STK11IP PE=1 SV=3	69
F8VSE7	Transcription factor E2F7 (Fragment) OS=Homo sapiens GN=E2F7 PE=2 SV=1	68
J3QRV9	GTPase Era, mitochondrial (Fragment) OS=Homo sapiens GN=ERAL1 PE=4 SV=2	68
K7EJT8	AP-2 complex subunit beta OS=Homo sapiens GN=AP2B1 PE=4 SV=1	68
Q08380	Galectin-3-binding protein OS=Homo sapiens GN=LGALS3BP PE=1 SV=1	68
H3BTN5	Pyruvate kinase (Fragment) OS=Homo sapiens GN=PKM PE=2 SV=1	67
P35251	Replication factor C subunit 1 OS=Homo sapiens GN=RFC1 PE=1 SV=4	67
E7EUY5	Single-stranded DNA-binding protein, mitochondrial (Fragment) OS=Homo sapiens GN=SSBP1 PE=4 SV=1	66
Q13501	Sequestosome-1 OS=Homo sapiens GN=SQSTM1 PE=1 SV=1	66
Q6P158	Putative ATP-dependent RNA helicase DHX57 OS=Homo sapiens GN=DHX57 PE=1 SV=2	66
Q9H2M9	Rab3 GTPase-activating protein non-catalytic subunit OS=Homo sapiens GN=RAB3GAP2 PE=1 SV=1	66
F8VNX8	TRAF-type zinc finger domain-containing protein 1 (Fragment) OS=Homo sapiens GN=TRAFD1 PE=2 SV=1	65
H0Y368	Dolichol-phosphate mannosyltransferase (Fragment) OS=Homo sapiens GN=DPM1 PE=4 SV=1	65
O00425	Insulin-like growth factor 2 mRNA-binding protein 3 OS=Homo sapiens GN=IGF2BP3 PE=1 SV=2	65
H7C1G6	Autophagy-related protein 9A (Fragment) OS=Homo sapiens GN=ATG9A PE=2 SV=1	64
O00767	Acyl-CoA desaturase OS=Homo sapiens GN=SCD PE=1 SV=2	64
Q13895	Bystin OS=Homo sapiens GN=BYSL PE=1 SV=3	64
A6NLM8	Translocon-associated protein subunit delta OS=Homo sapiens GN=SSR4 PE=2 SV=1	63
B4DXI8	26S proteasome non-ATPase regulatory subunit 7 OS=Homo sapiens GN=PSMD7 PE=2 SV=1	63
B4E241	Serine/arginine-rich-splicing factor 3 OS=Homo sapiens GN=SFRS3 PE=2 SV=1	63
F5H5K9	Neuropathy target esterase OS=Homo sapiens GN=PNPLA6 PE=2 SV=1	63
H0YLA2	Signal recognition particle 14 kDa protein OS=Homo sapiens GN=SRP14 PE=2 SV=1	63
J3KNQ3	26S proteasome non-ATPase regulatory subunit 13 OS=Homo sapiens GN=PSMD13 PE=4 SV=1	63
Q9Y2W1	Thyroid hormone receptor-associated protein 3 OS=Homo sapiens GN=THRAP3 PE=1 SV=2	63
H0YAF8	Guanine nucleotide-binding protein subunit beta-2-like 1 (Fragment) OS=Homo sapiens GN=GNB2L1 PE=4 SV=1	62
J3KPX7	Prohibitin-2 OS=Homo sapiens GN=PHB2 PE=4 SV=1	62
J3KQE0	SUN domain-containing protein 2 OS=Homo sapiens GN=SUN2 PE=4 SV=1	62
O95347	Structural maintenance of chromosomes protein 2 OS=Homo sapiens GN=SMC2 PE=1 SV=2	62
Q8IW35	Centrosomal protein of 97 kDa OS=Homo sapiens GN=CEP97 PE=1 SV=1	62
B4DXZ6	Fragile X mental retardation syndrome-related protein 1 OS=Homo sapiens GN=FXR1 PE=2 SV=1	61
F8VV32	Lysozyme C OS=Homo sapiens GN=LYZ PE=2 SV=1	61
H0Y6E7	RNA-binding motif protein, X chromosome, N-terminally processed (Fragment) OS=Homo sapiens GN=RBMX PE=4 SV=2	61
H3BP88	28S ribosomal protein S34, mitochondrial OS=Homo sapiens GN=MRPS34 PE=2 SV=1	61
M0QXS5	Heterogeneous nuclear ribonucleoprotein L (Fragment) OS=Homo sapiens GN=HNRNPL PE=4 SV=1	61
P61204	ADP-ribosylation factor 3 OS=Homo sapiens GN=ARF3 PE=1 SV=2	61
Q9H936	Mitochondrial glutamate carrier 1 OS=Homo sapiens GN=SLC25A22 PE=1 SV=1	61
Q9NP73	UDP-N-acetylglucosamine transferase subunit ALG13 homolog OS=Homo sapiens GN=ALG13 PE=1 SV=2	61
B4E2P2	Translocon-associated protein subunit gamma OS=Homo sapiens GN=SSR3 PE=2 SV=1	60
H3BST5	Mitochondrial Rho GTPase 2 (Fragment) OS=Homo sapiens GN=RHOT2 PE=2 SV=2	60
J3KNL6	Protein transport protein Sec16A OS=Homo sapiens GN=SEC16A PE=4 SV=1	60
Q1KMD3	Heterogeneous nuclear ribonucleoprotein U-like protein 2 OS=Homo sapiens GN=HNRNPUL2 PE=1 SV=1	60
Q9H223	EH domain-containing protein 4 OS=Homo sapiens GN=EHD4 PE=1 SV=1	60
Q9NUL7	Probable ATP-dependent RNA helicase DDX28 OS=Homo sapiens GN=DDX28 PE=1 SV=2	60
A0FGR8-4	Isoform 4 of Extended synaptotagmin-2 OS=Homo sapiens GN=ESYT2	59
E9PKD5	26S protease regulatory subunit 6A (Fragment) OS=Homo sapiens GN=PSMC3 PE=2 SV=1	59
G3V0E4	Mitochondrial-processing peptidase subunit beta OS=Homo sapiens GN=PMPCB PE=2 SV=1	59
Q13247	Serine/arginine-rich splicing factor 6 OS=Homo sapiens GN=SRSF6 PE=1 SV=2	59
B4DJ93	Phosphoribosylformylglycinamidine cyclo-ligase OS=Homo sapiens GN=GART PE=2 SV=1	58
J3QLG3	Protein flightless-1 homolog OS=Homo sapiens GN=FLII PE=4 SV=1	58
P25788	Proteasome subunit alpha type-3 OS=Homo sapiens GN=PSMA3 PE=1 SV=2	58
Q96CS3	FAS-associated factor 2 OS=Homo sapiens GN=FAF2 PE=1 SV=2	58
D6R991	Matrin-3 (Fragment) OS=Homo sapiens GN=MATR3 PE=2 SV=1	57
H0Y9G6	39S ribosomal protein L3, mitochondrial (Fragment) OS=Homo sapiens GN=MRPL3 PE=3 SV=1	57
H0YKS4	Annexin (Fragment) OS=Homo sapiens GN=ANXA2 PE=2 SV=1	57
P19388	DNA-directed RNA polymerases I, II, and III subunit RPABC1 OS=Homo sapiens GN=POLR2E PE=1 SV=4	57
P20618	Proteasome subunit beta type-1 OS=Homo sapiens GN=PSMB1 PE=1 SV=2	57
P49406	39S ribosomal protein L19, mitochondrial OS=Homo sapiens GN=MRPL19 PE=1 SV=2	57
P62314	Small nuclear ribonucleoprotein Sm D1 OS=Homo sapiens GN=SNRPD1 PE=1 SV=1	57
Q5T447	E3 ubiquitin-protein ligase HECTD3 OS=Homo sapiens GN=HECTD3 PE=1 SV=1	57
C9JZG1	Eukaryotic translation initiation factor 3 subunit B (Fragment) OS=Homo sapiens GN=EIF3B PE=2 SV=1	56
E7EPR3	Gamma-interferon-inducible protein 16 OS=Homo sapiens GN=IFI16 PE=2 SV=1	56
K7EJ81	116 kDa U5 small nuclear ribonucleoprotein component OS=Homo sapiens GN=EFTUD2 PE=4 SV=1	56
O43852	Calumenin OS=Homo sapiens GN=CALU PE=1 SV=2	56
P25787	Proteasome subunit alpha type-2 OS=Homo sapiens GN=PSMA2 PE=1 SV=2	56
P28074	Proteasome subunit beta type-5 OS=Homo sapiens GN=PSMB5 PE=1 SV=3	56
Q13371	Phosducin-like protein OS=Homo sapiens GN=PDCL PE=1 SV=3	56
Q8WVM0	Dimethyladenosine transferase 1, mitochondrial OS=Homo sapiens GN=TFB1M PE=1 SV=1	56
Q9UBM7	7-dehydrocholesterol reductase OS=Homo sapiens GN=DHCR7 PE=1 SV=1	56
A0FGR8	Extended synaptotagmin-2 OS=Homo sapiens GN=ESYT2 PE=1 SV=1	55
G3V0G5	Ankyrin repeat and MYND domain containing 2, isoform CRA_c OS=Homo sapiens GN=ANKMY2 PE=2 SV=1	55
G5E9Q5	ARP1 actin-related protein 1 homolog B, centractin beta (Yeast), isoform CRA_c OS=Homo sapiens GN=ACTR1B PE=2 SV=1	55
H0YJS4	Eukaryotic translation initiation factor 2 subunit 1 (Fragment) OS=Homo sapiens GN=EIF2S1 PE=4 SV=1	55
P60842	Eukaryotic initiation factor 4A-I OS=Homo sapiens GN=EIF4A1 PE=1 SV=1	55
Q08AF3	Schlafen family member 5 OS=Homo sapiens GN=SLFN5 PE=1 SV=1	55
Q15645	Pachytene checkpoint protein 2 homolog OS=Homo sapiens GN=TRIP13 PE=1 SV=2	55
Q7L0Y3	Mitochondrial ribonuclease P protein 1 OS=Homo sapiens GN=TRMT10C PE=1 SV=2	55
H7BZL0	MKI67 FHA domain-interacting nucleolar phosphoprotein (Fragment) OS=Homo sapiens GN=MKI67IP PE=2 SV=1	54
O00232	26S proteasome non-ATPase regulatory subunit 12 OS=Homo sapiens GN=PSMD12 PE=1 SV=3	54
O75607	Nucleoplasmin-3 OS=Homo sapiens GN=NPM3 PE=1 SV=3	54
P11166	Solute carrier family 2, facilitated glucose transporter member 1 OS=Homo sapiens GN=SLC2A1 PE=1 SV=2	54
P43686	26S protease regulatory subunit 6B OS=Homo sapiens GN=PSMC4 PE=1 SV=2	54
P62258	14-3-3 protein epsilon OS=Homo sapiens GN=YWHAE PE=1 SV=1	54
Q14669	E3 ubiquitin-protein ligase TRIP12 OS=Homo sapiens GN=TRIP12 PE=1 SV=1	54
Q9UKV8	Protein argonaute-2 OS=Homo sapiens GN=EIF2C2 PE=1 SV=3	54
B4DGU4	Catenin beta-1 OS=Homo sapiens GN=CTNNB1 PE=2 SV=1	53
E7EUE1	ATP-binding cassette sub-family D member 3 OS=Homo sapiens GN=ABCD3 PE=2 SV=1	53
E9PB70	Kinesin-like protein KIF2A OS=Homo sapiens GN=KIF2A PE=2 SV=1	53
G3XAA9	Ribosomal protein S6 kinase alpha-4 OS=Homo sapiens GN=RPS6KA4 PE=2 SV=1	53
H0YL69	Proteasome subunit alpha type (Fragment) OS=Homo sapiens GN=PSMA4 PE=2 SV=1	53
H3BRE8	RNA polymerase II-associated protein 1 OS=Homo sapiens GN=RPAP1 PE=2 SV=1	53
P41250	Glycine--tRNA ligase OS=Homo sapiens GN=GARS PE=1 SV=3	53
P46777	60S ribosomal protein L5 OS=Homo sapiens GN=RPL5 PE=1 SV=3	53
B1AH77	Ras-related C3 botulinum toxin substrate 2 OS=Homo sapiens GN=RAC2 PE=2 SV=1	52
B7Z4Q3	Putative RNA-binding protein Luc7-like 2 OS=Homo sapiens GN=LUC7L2 PE=2 SV=1	52
P28072	Proteasome subunit beta type-6 OS=Homo sapiens GN=PSMB6 PE=1 SV=4	52
Q08J23	tRNA (cytosine(34)-C(5))-methyltransferase OS=Homo sapiens GN=NSUN2 PE=1 SV=2	52
Q13243	Serine/arginine-rich splicing factor 5 OS=Homo sapiens GN=SRSF5 PE=1 SV=1	52
Q13643	Four and a half LIM domains protein 3 OS=Homo sapiens GN=FHL3 PE=1 SV=4	52
Q5JR04	Mov10, Moloney leukemia virus 10, homolog (Mouse), isoform CRA_a OS=Homo sapiens GN=MOV10 PE=2 SV=1	52
Q5RHS7	Protein S100-A2 OS=Homo sapiens GN=S100A2 PE=2 SV=1	52
Q96EL2	28S ribosomal protein S24, mitochondrial OS=Homo sapiens GN=MRPS24 PE=1 SV=1	52
Q96T76	MMS19 nucleotide excision repair protein homolog OS=Homo sapiens GN=MMS19 PE=1 SV=2	52
Q9BRS2	Serine/threonine-protein kinase RIO1 OS=Homo sapiens GN=RIOK1 PE=1 SV=2	52
Q9UBX3	Mitochondrial dicarboxylate carrier OS=Homo sapiens GN=SLC25A10 PE=1 SV=2	52
Q9UET6	Putative tRNA (cytidine(32)/guanosine(34)-2~-O)-methyltransferase OS=Homo sapiens GN=FTSJ1 PE=1 SV=2	52
D6RBD7	Eukaryotic translation elongation factor 1 epsilon-1 OS=Homo sapiens GN=EEF1E1 PE=2 SV=1	51
E9PDU5	WD repeat-containing protein 6 OS=Homo sapiens GN=WDR6 PE=2 SV=1	51
G3XAA8	La ribonucleoprotein domain family, member 4, isoform CRA_j OS=Homo sapiens GN=LARP4 PE=2 SV=1	51
G3XAP5	L-lactate dehydrogenase OS=Homo sapiens GN=LDHC PE=2 SV=1	51
H0YDP7	39S ribosomal protein L49, mitochondrial (Fragment) OS=Homo sapiens GN=MRPL49 PE=4 SV=1	51
O95429	BAG family molecular chaperone regulator 4 OS=Homo sapiens GN=BAG4 PE=1 SV=1	51
O95573	Long-chain-fatty-acid--CoA ligase 3 OS=Homo sapiens GN=ACSL3 PE=1 SV=3	51
Q15149	Plectin OS=Homo sapiens GN=PLEC PE=1 SV=3	51
Q9BYD6	39S ribosomal protein L1, mitochondrial OS=Homo sapiens GN=MRPL1 PE=1 SV=2	51
Q9Y3B7	39S ribosomal protein L11, mitochondrial OS=Homo sapiens GN=MRPL11 PE=1 SV=1	51
F5GZS0	Probable ATP-dependent RNA helicase DHX36 OS=Homo sapiens GN=DHX36 PE=2 SV=1	50
H3BQG3	Pyruvate dehydrogenase phosphatase regulatory subunit, mitochondrial OS=Homo sapiens GN=PDPR PE=2 SV=1	50
O15269	Serine palmitoyltransferase 1 OS=Homo sapiens GN=SPTLC1 PE=1 SV=1	50
O43379	WD repeat-containing protein 62 OS=Homo sapiens GN=WDR62 PE=1 SV=4	50
P28066	Proteasome subunit alpha type-5 OS=Homo sapiens GN=PSMA5 PE=1 SV=3	50
P48059	LIM and senescent cell antigen-like-containing domain protein 1 OS=Homo sapiens GN=LIMS1 PE=1 SV=4	50
Q8N1G4	Leucine-rich repeat-containing protein 47 OS=Homo sapiens GN=LRRC47 PE=1 SV=1	50
Q9NVS2-3	Isoform 3 of 28S ribosomal protein S18a, mitochondrial OS=Homo sapiens GN=MRPS18A	50

## Sheet: merge with MitoCarta2.0
Protein name	HumanGeneID	Symbol	ProteinScore
P10809	3329	HSPD1	10148
Q9UQ07	5891	MOK	4705
P38646	3313	HSPA9	581
Q99832	10574	CCT7	556
P49411	7284	TUFM	458
P12236	293	SLC25A6	456
P05141	292	SLC25A5	433
P12235	291	SLC25A4	315
Q9UJS0	10165	SLC25A13	315
Q9NVI7-2	55210	ATAD3A	303
H7BXY3	22907	DHX30	277
I3L1P8	8402	SLC25A11	274
O75746	8604	SLC25A12	274
Q9Y6N5	58472	SQRDL	224
O95831	9131	AIFM1	211
P62263	6208	RPS14	209
Q5T9A4	83858	ATAD3B	208
O75489	4722	NDUFS3	204
K7ENP3	498	ATP5A1	202
P62906	4736	RPL10A	183
B4DRT2	23107	MRPS27	173
Q9Y3D9	51649	MRPS23	173
Q96TC7	55177	RMDN3	167
F8WCY5	5955	RCN2	145
P82933	64965	MRPS9	145
B9A067	10989	IMMT	137
P82673	60488	MRPS35	135
J3QLS3	51081	MRPS7	133
Q96EY7	55037	PTCD3	132
P42704	10128	LRPPRC	130
G5E9V5	56945	MRPS22	128
G3V5Z7	5687	PSMA6	126
Q00325	5250	SLC25A3	123
P18077	6165	RPL35A	118
P36542	509	ATP5C1	116
Q96TA2	10730	YME1L1	116
Q9Y399	51116	MRPS2	112
B4DP62	6576	SLC25A1	108
P53985	6566	SLC16A1	106
O60783	63931	MRPS14	100
Q9Y676	28973	MRPS18B	100
K7ELQ0	51073	MRPL4	97
Q3ZCQ8	92609	TIMM50	96
Q96EY1	9093	DNAJA3	96
J3KQ73	23770	FKBP8	94
P51398	7818	DAP3	94
Q5T653	51069	MRPL2	94
P82914	64960	MRPS15	92
P82675	64969	MRPS5	89
P40939	3030	HADHA	88
Q5T160	57038	RARS2	88
Q96HS1	192111	PGAM5	84
Q9Y5J9	26521	TIMM8B	82
P82663	64432	MRPS25	78
P49327	2194	FASN	77
Q8WWC4	79568	C2orf47	77
Q9Y2Q9	28957	MRPS28	75
I3L0T6	55178	RNMTL1	74
O75306	4720	NDUFS2	74
Q96DV4	64978	MRPL38	74
Q9H9J2	65080	MRPL44	74
J3KQY1	29093	MRPL22	73
P82912	64963	MRPS11	73
F8WAS3	4698	NDUFA5	72
P08574	1537	CYC1	72
J3QRV9	26284	ERAL1	68
E7EUY5	6742	SSBP1	66
J3KPX7	11331	PHB2	62
H3BP88	65993	MRPS34	61
Q9H936	79751	SLC25A22	61
H3BST5	89941	RHOT2	60
Q9NUL7	55794	DDX28	60
G3V0E4	9512	PMPCB	59
H0Y9G6	11222	MRPL3	57
P49406	9801	MRPL19	57
Q8WVM0	51106	TFB1M	56
Q7L0Y3	54931	TRMT10C	55
E7EUE1	5825	ABCD3	53
P41250	2617	GARS	53
B7Z4Q3	154791	C7orf55	52
Q96EL2	64951	MRPS24	52
Q9UBX3	1468	SLC25A10	52
H0YDP7	740	MRPL49	51
Q9BYD6	65008	MRPL1	51
Q9Y3B7	65003	MRPL11	51
H3BQG3	55066	PDPR	50
Q9NVS2-3	55168	MRPS18A	50
