# Supplementary material for: A subcellular map of the human kinome
Source: eLife. 2021 May 14;10:e64943. doi: 10.7554/eLife.64943 (PMC8175086; doi:10.7554/eLife.64943)
Supplement: Figure 7—source data 2. [file elife-64943-fig7-data2.xlsx]

## Sheet: Raw data Figure 7
B
	Mito length (μm)
	WT-Vec	2.17273	2.37818	2.49818	3.42	1.76909	2.47273	1.78182	3.48182	1.68182	0.76	2.10182	1.16545	2.08364	1.97636	2.82909	1.04182	1.52909	1.91636	1.79636	3.89091	2.93818	1.20364	1.00727	2.17091	2.63636	3.02727	2.15455	0.916364	1.79818	1.62182
	MOK KO-Vec	3.25454	0.941818	0.632727	1.00364	1.92727	1.13818	1.41818	2.78364	2.39454	2.23091	2.21818	2.06182	1.16182	1.25273	3.52727	2.69455	2.61818	0.601818	2.73636	1.86909	1.28	0.856364	2.48909	2.90545	3.40909	1.86909	1.27636	0.756364	1.26364	2.68909
	MOK KO-MOK1	3.00364	1.87454	0.952727	0.643636	1.34364	3.18182	1.90182	2.41818	1.53091	2.92182	1.22545	1.41091	2.69273	1.64545	0.829091	1.22	0.672727	0.941818	2.39636	0.983636	0.985455	0.714545	2.05273	2.79636	1.45091	1.41091	1.05636	3.22364	1.84546	1.04727
	MOK KO-MOK2	1.95454	1.60546	2.67273	0.661818	3.14546	2.04364	3.64727	1.58909	2.39454	0.965455	2.78364	2.76182	2.53455	2.94909	0.589091	1.81818	0.394545	0.78	1.33273	0.850909	2.99455	0.52	1.90364	0.525455	0.507273	1.51455	0.941818	1.93818	0.603636	1.07455
	Cirstae number/μm
	WT-Vec	7.36402	6.30734	8.00582	8.77193	6.21788	6.875	7.29592	6.03133	2.37838	7.89474	6.6609	6.86428	5.75916	5.56578	3.5347	3.83944	6.53983	6.78368	9.46356	9.25234	6.12624	8.30816	3.97112	7.37018	7.58621	7.92793	6.03376	5.45635	11.1224	8.01569
	MOK KO-Vec	5.53073	5.30888	4.74138	6.97464	4.15094	6.15016	2.82051	3.59242	3.34093	3.58598	4.95902	2.42504	5.16432	3.99129	2.26804	4.45344	2.67361	6.64653	4.38538	3.21012	6.25	3.50319	5.62454	5.1627	4.69333	6.95525	4.70085	2.64423	3.95683	3.34686
	MOK KO-MOK1	8.9891	10.1358	6.29771	7.76836	8.18674	8.17143	8.413	5.37594	5.87886	5.13379	6.52819	6.37887	5.19919	5.46961	9.64912	7.37705	5.94595	6.37066	7.92868	9.14972	6.08856	6.99746	7.30735	4.29129	5.51378	7.08763	5.67986	5.89396	5.41872	6.68403
	MOK KO-MOK2	6.13954	4.36014	4.86395	6.04396	6.35838	5.87189	9.87039	8.81007	10.4404	6.21469	6.46636	5.43121	5.91822	7.79901	6.79012	12.1	10.1382	10.2564	6.00273	7.05128	7.01275	9.61538	7.87966	7.61246	7.8853	6.60264	11.6795	11.8668	8.28313	7.44501
C
	Time (minutes)	WT-Vec				MOK KO-Vec				MOK KO-MOK1				MOK KO-MOK2
	1.30847	129.521	113.902	122.553	107.818	90.595	97.8342	85.5426	72.6342	121.847	89.1876	87.3046	76.3699	124.923	112.359	121.708	96.5208
	7.76864	123.441	109.96	117.056	103.758	78.2636	93.0549	80.7678	67.8284	115.035	82.3643	83.5861	72.6411	117.154	104.751	115.589	89.42
	14.2185	122.894	108.396	114.547	101.437	78.5353	91.6033	78.9056	67.5692	111.395	81.8969	81.8065	70.7753	115.525	102.781	115.014	88.6663
	20.7827	60.8608	58.139	56.3362	51.9562	44.2233	44.0059	35.9528	35.3025	50.8182	35.5316	28.4473	30.3899	55.324	54.7124	56.0321	42.1245
	27.2381	59.9783	56.5285	58.3947	54.2085	44.4217	42.6516	36.573	34.6225	51.9696	36.5101	28.8918	30.837	56.519	56.0843	57.9074	43.0957
	33.7032	62.2946	59.987	61.297	56.1153	50.9935	47.962	41.9153	37.8712	55.2891	37.7093	31.657	32.4383	59.9068	60.4734	61.9467	47.1684
	40.2699	177.924	151.639	165.057	133.25	107.601	137.932	121.276	93.8512	181.98	132.411	139.975	119.307	177.59	139.865	176.503	140.529
	46.7424	161.438	123.387	138.216	116.611	87.789	111.069	94.2149	76.409	150.003	111.15	111.569	109.604	154.463	120.552	144.742	111.341
	53.1934	149.605	108.611	121.636	104.519	72.1742	96.8209	79.9618	65.3604	134.263	100.239	101.224	99.812	132.927	106.633	131.119	98.0968
	59.7485	32.6023	39.7161	33.8428	27.9837	27.8429	21.0707	21.0249	17.6685	29.4223	17.5459	11.6817	16.1114	33.7594	37.7295	32.2091	21.2932
	66.1646	34.3281	37.9401	37.3363	32.477	28.6139	26.9566	22.5283	21.0013	32.0795	21.355	14.9368	16.6248	36.3338	39.2445	35.3233	24.8508
	72.5982	34.0828	38.0162	36.6148	29.008	26.5301	25.6679	21.9997	19.6177	33.2082	20.6658	15.6703	15.8621	36.9592	38.5294	36.6007	23.7086
D
		WT-Vec				MOK KO-Vec				MOK KO-MOK1				MOK KO-MOK2
	Basal	88.8111	70.3798	77.9325	72.4295	52.0052	65.9354	56.906	47.9515	78.1864	61.2311	66.1362	54.9132	78.5663	64.2512	78.4133	64.9576
	ATP production	60.5993	48.409	53.2503	45.3221	27.5418	43.6412	36.9903	29.6981	56.1055	44.1876	50.1495	38.3369	55.6187	42.3072	53.0673	41.4979
E
	WT-Vec	1.03068
		1.0473
		0.921687
	MOK KO-Vec	0.789723
		0.800612
		0.818602
	MOK KO-MOK1	0.814712
		0.902518
		0.85812
	MOK KO-MOK2	0.961337
		1.07104
		1.17366
K
	Cirstae number/μm
	shNT	5.18623	7.45482	6.21263	7.21875	5.4111	7.64647	7.45258	11.7333	5.60652	6.84647	6.9585	7.01998	7.43746	7.38255	10.1601	8.14574	7.8125	7.57196	7.37636	6.85053	9.96377	7.90104	6.24113	4.5929	7.84695	4.84155	6.35104	4.85294	4.79651	5.74413
	shATAD3A#1	7.14286	8.0518	2.90238	7.14286	3.11615	4.7619	8.34387	6.21971	4.56431	6.68919	3.53824	3.1015	6.16987	5.33333	4.97416	4.50149	3.26087	4.78261	7.94224	2.84974	4.24383	9.05172	4.26908	5.32258	6.52819	4.19048	4.63483	5.39216	5.56962	5.45229
	shATAD3A#2	6.26078	4.32292	3.27632	6.47314	5.24579	7.60073	5.87462	5.8042	3.24219	4.63687	3.62445	3.73874	6.61355	5.70229	3.59975	3.87127	4.67167	4.02913	7.206	5.68493	5.57047	2.94326	3.95992	3.98273	5.44619	4.64552	2.72429	3.34978	3.55918	6.76998

## Sheet: Raw data figure supplement 1
B				D
	shNT	1.03732			Mito length (μm)
	shNT	1.00058			shNT	1.74699	0.833735	0.790361	0.650602	1.58554	1.0747	1.77831	0.910843	1.0747	1.28434	2.08193	1.32289	0.795181	1.0506	1.14217	0.722892	1.0506	2.05301	0.710843	1.80241	2.31325	1.04819	1.6506	0.554217	1.15663	0.987952	1.52048	0.607229	0.515663	0.554217	1.01205	2.1253	2.32771	1.01446	0.891566	1.56627	0.481928	1.16145	1.28434	2.3494	1.20964	0.990361	2.76867	3.86265
	shMOK#1	0.28412			shMOK#1	2.27229	5.44578	2.83373	1.88675	2.65542	0.920482	0.746988	1.03374	0.824096	1.32289	0.633735	2.66988	1.3012	0.990361	4.18795	0.908434	1.12289	0.990361	1.01205	0.99759	1.30602	1.66747	1.82651	1.29157	0.508434	1.11807	1.40482	0.681928	0.546988	0.556627	1.36627	0.771084	0.987952	1.1759	1.06747	1.6747	2.88193	0.720482	1.66988	1.55422	1.56627	1.15181	2.79277	0.819277
	shMOK#1	0.264568			shMOK#2	0.563855	2.24819	1.97831	0.913253	1.71807	2.72289	1.06747	2.97349	2.15904	0.551807	1.4506	0.549398	3.44578	1.53735	1.15181	1.76867	1.25542	1.01687	1.80482	2.12048	0.860241	1.6506	0.522892	0.795181	1.05783	0.824096	0.775904	2.3759	0.489157	2.16867	1.83614	2.73253	0.636145	1.15181	0.689157	1.26024	2.2241	0.60241	1.1012	3.63855	1.35181	1.33494	1.28434	1.28675
	shMOK#2	0.305637
	shMOK#2	0.299442			Cirstae number/μm
					shNT	5.15172	8.39595	5.06098	4.61111	4.41489	8.37444	8.99729	3.29365	6.51345	3.89306	5.76389	3.7796	5.0303	6.66284	2.62658	4.15	3.80734	4.3838	4.22034	6.65775	5.1875	6.67816	6.05839	7.21739	5.1875	5.06098	3.94612	3.29365	1.93925	3.6087	5.92857	6.11678	4.72567	10.8432	2.24324	2.55385	6.225	4.30498	6.22889	5.10769	4.13347	7.06813	5.41775	6.21335
					shMOK#1	3.52068	4.22345	2.11735	4.77011	3.38929	3.25916	4.01613	2.9021	2.4269	2.26776	1.57795	2.99639	3.07407	3.0292	2.86536	2.20159	3.56223	2.01946	3.95238	2.00483	3.82841	3.59827	3.83245	5.41978	5.90047	4.47198	2.84734	7.33216	1.82819	7.18615	3.65961	2.59375	4.04878	1.70082	4.68397	5.3741	1.38796	1.38796	0	0	1.27692	2.6046	2.1484	2.44118
					shMOK#2	1.7735	2.66881	2.02192	2.18997	2.91024	2.20354	5.62077	2.35413	4.6317	3.62445	6.20432	9.10088	2.9021	4.55329	4.341	3.39237	3.98273	1.96683	4.43258	4.24432	2.32493	1.81752	1.91244	2.51515	1.89066	1.21345	1.28882	2.94625	2.04433	1.84444	2.7231	2.19577	1.57197	3.4728	0	2.3805	3.59697	4.98	3.63239	3.02318	4.4385	2.99639	4.67167	3.10861
E						L
	shNT	1.01956	0.981004	0.999434			shNT	1.05956	0.945061
	shMOK#1	0.839299	0.842256	0.841123			shATAD3A#1	0.158553	0.227326
	shMOK#2	0.869529	0.955081	0.924109			shATAD3A#2	0.135585	0.150944
[truncated: 6 more columns]
