# Supplementary material for: A subcellular map of the human kinome
Source: eLife. 2021 May 14;10:e64943. doi: 10.7554/eLife.64943 (PMC8175086; doi:10.7554/eLife.64943)
Supplement: Supplementary file 1. [file elife-64943-supp1.xlsx]

## Sheet: human kinome gene list
#	Official Symbol	Classification	Gene ID
1	AKT1	AGC:Akt:	207
2	AKT2	AGC:Akt:	208
3	AKT3	AGC:Akt:	10000
4	CIT	AGC:DMPK:CRIK	11113
5	CDC42BPA	AGC:DMPK:GEK	8476
6	CDC42BPB	AGC:DMPK:GEK	9578
7	CDC42BPG	AGC:DMPK:GEK	55561
8	DMPK	AGC:DMPK:GEK	1760
9	ROCK1	AGC:DMPK:ROCK	6093
10	ROCK2	AGC:DMPK:ROCK	9475
11	GRK2	AGC:GRK:BARK	156
12	GRK3	AGC:GRK:BARK	157
13	GRK1	AGC:GRK:GRK	6011
14	GRK4	AGC:GRK:GRK	2868
15	GRK5	AGC:GRK:GRK	2869
16	GRK6	AGC:GRK:GRK	2870
17	GRK7	AGC:GRK:GRK	131890
18	MAST1	AGC:MAST:MAST	56527
19	MAST2	AGC:MAST:MAST	23139
20	MAST3	AGC:MAST:MAST	23031
21	MAST4	AGC:MAST:MAST	375449
22	MASTL	AGC:MAST:MASTL	84930
23	LATS1	AGC:NDR:LATS	9113
24	LATS2	AGC:NDR:LATS	26524
25	STK38	AGC:NDR:NDR	11329
26	STK38L	AGC:NDR:NDR	23012
27	PDPK1	AGC:PDK1:	5170
28	PRKACA	AGC:PKA:	5566
29	PRKACB	AGC:PKA:	5567
30	PRKACG	AGC:PKA:	5568
31	PRKX	AGC:PKA:	5613
32	PRKY	AGC:PKA:	5616
33	PRKCA	AGC:PKC:PKCa	5578
34	PRKCB	AGC:PKC:PKCa	5579
35	PRKCG	AGC:PKC:PKCa	5582
36	PRKCD	AGC:PKC:PKCd	5580
37	PRKCQ	AGC:PKC:PKCd	5588
38	PRKCE	AGC:PKC:PKCh	5581
39	PRKCH	AGC:PKC:PKCh	5583
40	PRKCI	AGC:PKC:PKCi	5584
41	PRKCZ	AGC:PKC:PKCi	5590
42	PRKG1	AGC:PKG:	5592
43	PRKG2	AGC:PKG:	5593
44	PKN1	AGC:PKN:	5585
45	PKN2	AGC:PKN:	5586
46	PKN3	AGC:PKN:	29941
47	RPS6KA4	AGC:RSK:MSK CAMK:RSKb:MSKb	8986
48	RPS6KA5	AGC:RSK:MSK CAMK:RSKb:MSKb	9252
49	RPS6KB1	AGC:RSK:RSKp70	6198
50	RPS6KB2	AGC:RSK:RSKp70	6199
51	RPS6KA1	AGC:RSK:RSKp90 CAMK:RSKb:RSKb	6195
52	RPS6KA2	AGC:RSK:RSKp90 CAMK:RSKb:RSKb	6196
53	RPS6KA3	AGC:RSK:RSKp90 CAMK:RSKb:RSKb	6197
54	RPS6KA6	AGC:RSK:RSKp90 CAMK:RSKb:RSKb	27330
55	RPS6KC1	AGC:RSKL:	26750
56	RPS6KL1	AGC:RSKL:	83694
57	RSKR	AGC:RSKR:	124923
58	SGK1	AGC:SGK:	6446
59	SGK2	AGC:SGK:	10110
60	SGK3	AGC:SGK:	23678
61	STK32A	AGC:YANK:	202374
62	STK32B	AGC:YANK:	55351
63	STK32C	AGC:YANK:	57740
64	ADCK3	Atypical:ABC1:ABC1-A	56997
65	ADCK4	Atypical:ABC1:ABC1-A	79934
66	ADCK1	Atypical:ABC1:ABC1-B	57143
67	ADCK2	Atypical:ABC1:ABC1-C	90956
68	ADCK5	Atypical:ABC1:ABC1-D	203054
69	ALPK1	Atypical:Alpha:Alpha-Unclassified	80216
70	ALPK2	Atypical:Alpha:Alpha-Unclassified	115701
71	ALPK3	Atypical:Alpha:Alpha-Unclassified	57538
72	TRPM6	Atypical:Alpha:ChaK	140803
73	TRPM7	Atypical:Alpha:ChaK	54822
74	EEF2K	Atypical:Alpha:eEF2K	29904
75	BAZ1A	Atypical:BAZ:	11177
76	BAZ1B	Atypical:BAZ:	9031
77	ABR	Atypical:BCR:	29
78	BCR	Atypical:BCR:	613
79	BLVRA	Atypical:BLVRA:	644
80	BRD2	Atypical:BRD:	6046
81	BRD3	Atypical:BRD:	8019
82	BRD4	Atypical:BRD:	23476
83	BRDT	Atypical:BRD:	676
84	CERT1	Atypical:Col4A3BP:	10087
85	FASTK	Atypical:FAST:	10922
86	STK19	Atypical:G11:	8859
87	GTF2F1	Atypical:GTF2F1:	2962
88	BCKDK	Atypical:PDHK:BCKDK	10295
89	PDK1	Atypical:PDHK:PDHK	5163
90	PDK2	Atypical:PDHK:PDHK	5164
91	PDK3	Atypical:PDHK:PDHK	5165
92	PDK4	Atypical:PDHK:PDHK	5166
93	ATM	Atypical:PIKK:ATM	472
94	ATR	Atypical:PIKK:ATR	545
95	PRKDC	Atypical:PIKK:DNAPK	5591
96	MTOR	Atypical:PIKK:FRAP	2475
97	SMG1	Atypical:PIKK:SMG1	23049
98	TRRAP	Atypical:PIKK:TRRAP	8295
99	RIOK1	Atypical:RIO:RIO1	83732
100	RIOK2	Atypical:RIO:RIO2	55781
101	RIOK3	Atypical:RIO:RIO3	8780
102	TAF1	Atypical:TAF1:	6872
103	TAF1L	Atypical:TAF1:	138474
104	TRIM24	Atypical:TIF1:	8805
105	TRIM28	Atypical:TIF1:	10155
106	TRIM33	Atypical:TIF1:	51592
107	TRIM66	Atypical:TIF1:	9866
108	CAMK1	CAMK:CAMK1:	8536
109	CAMK1D	CAMK:CAMK1:	57118
110	CAMK1G	CAMK:CAMK1:	57172
111	CAMK4	CAMK:CAMK1:	814
112	PNCK	CAMK:CAMK1:	93843
113	CAMK2A	CAMK:CAMK2:	815
114	CAMK2B	CAMK:CAMK2:	816
115	CAMK2D	CAMK:CAMK2:	817
116	CAMK2G	CAMK:CAMK2:	818
117	PRKAA1	CAMK:CAMKL:AMPK	5562
118	PRKAA2	CAMK:CAMKL:AMPK	5563
119	BRSK1	CAMK:CAMKL:BRSK	84446
120	BRSK2	CAMK:CAMKL:BRSK	9024
121	CHEK1	CAMK:CAMKL:CHK1	1111
122	HUNK	CAMK:CAMKL:HUNK	30811
123	STK11	CAMK:CAMKL:LKB	6794
124	MARK1	CAMK:CAMKL:MARK	4139
125	MARK2	CAMK:CAMKL:MARK	2011
126	MARK3	CAMK:CAMKL:MARK	4140
127	MARK4	CAMK:CAMKL:MARK	57787
128	MELK	CAMK:CAMKL:MELK	9833
129	NIM1	CAMK:CAMKL:NIM1	167359
130	NUAK1	CAMK:CAMKL:NuaK	9891
131	NUAK2	CAMK:CAMKL:NuaK	81788
132	PASK	CAMK:CAMKL:PASK	23178
133	SIK1	CAMK:CAMKL:QIK	150094
134	SIK2	CAMK:CAMKL:QIK	23235
135	SIK3	CAMK:CAMKL:QIK	23387
136	SNRK	CAMK:CAMKL:SNRK	54861
137	CAMKV	CAMK:CAMK-Unique:	79012
138	CASK	CAMK:CASK:	8573
139	DAPK1	CAMK:DAPK:DAPK	1612
140	DAPK2	CAMK:DAPK:DAPK	23604
141	DAPK3	CAMK:DAPK:DAPK	1613
142	STK17A	CAMK:DAPK:DRAK	9263
143	STK17B	CAMK:DAPK:DRAK	9262
144	DCLK1	CAMK:DCAMKL:	9201
145	DCLK2	CAMK:DCAMKL:	166614
146	DCLK3	CAMK:DCAMKL:	85443
147	MAPKAPK2	CAMK:MAPKAPK:MK2	9261
148	MAPKAPK3	CAMK:MAPKAPK:MK2	7867
149	MAPKAPK5	CAMK:MAPKAPK:MK5	8550
150	MKNK1	CAMK:MAPKAPK:MNK	8569
151	MKNK2	CAMK:MAPKAPK:MNK	2872
152	MYLK	CAMK:MLCK:	4638
153	MYLK2	CAMK:MLCK:	85366
154	MYLK3	CAMK:MLCK:	91807
155	MYLK4	CAMK:MLCK:	340156
156	TTN	CAMK:MLCK:	7273
157	PHKG1	CAMK:PHK:	5260
158	PHKG2	CAMK:PHK:	5261
159	PIM1	CAMK:PIM:	5292
160	PIM2	CAMK:PIM:	11040
161	PIM3	CAMK:PIM:	415116
162	PRKD1	CAMK:PKD:	5587
163	PRKD2	CAMK:PKD:	25865
164	PRKD3	CAMK:PKD:	23683
165	PSKH1	CAMK:PSK:	5681
166	PSKH2	CAMK:PSK:	85481
167	CHEK2	CAMK:RAD53:	11200
168	STK40	CAMK:SgK495:	83931
169	STK33	CAMK:STK33:	65975
170	TRIB1	CAMK:Trbl:	10221
171	TRIB2	CAMK:Trbl:	28951
172	TRIB3	CAMK:Trbl:	57761
173	KALRN	CAMK:Trio:	8997
174	TRIO	CAMK:Trio:	7204
175	OBSCN	CAMK:Trio: CAMK:Trio:	84033
176	SPEG	CAMK:Trio: CAMK:Trio:	10290
177	TSSK1B	CAMK:TSSK:	83942
178	TSSK2	CAMK:TSSK:	23617
179	TSSK3	CAMK:TSSK:	81629
180	TSSK4	CAMK:TSSK:	283629
181	TSSK6	CAMK:TSSK:	83983
182	CSNK1A1	CK1:CK1:CK1-A	1452
183	CSNK1A1L	CK1:CK1:CK1-A	122011
184	CSNK1D	CK1:CK1:CK1-D	1453
185	CSNK1E	CK1:CK1:CK1-D	1454
186	CSNK1G1	CK1:CK1:CK1-G	53944
187	CSNK1G2	CK1:CK1:CK1-G	1455
188	CSNK1G3	CK1:CK1:CK1-G	1456
189	TTBK1	CK1:TTBK:	84630
190	TTBK2	CK1:TTBK:	146057
191	VRK1	CK1:VRK:	7443
192	VRK2	CK1:VRK:	7444
193	VRK3	CK1:VRK:	51231
194	CDK20	CMGC:CDK:CCRK	23552
195	CDK1	CMGC:CDK:CDC2	983
196	CDK10	CMGC:CDK:CDK10	8558
197	CDK11A	CMGC:CDK:CDK11	728642
198	CDK11B	CMGC:CDK:CDK11	984
199	CDK2	CMGC:CDK:CDK2	1017
200	CDK3	CMGC:CDK:CDK2	1018
201	CDK4	CMGC:CDK:CDK4	1019
202	CDK6	CMGC:CDK:CDK4	1021
203	CDK5	CMGC:CDK:CDK5	1020
204	CDK7	CMGC:CDK:CDK7	1022
205	CDK19	CMGC:CDK:CDK8	23097
206	CDK8	CMGC:CDK:CDK8	1024
207	CDK9	CMGC:CDK:CDK9	1025
208	CDK12	CMGC:CDK:CRK7	51755
209	CDK13	CMGC:CDK:CRK7	8621
210	CDK16	CMGC:CDK:PCTAIRE	5127
211	CDK17	CMGC:CDK:PCTAIRE	5128
212	CDK18	CMGC:CDK:PCTAIRE	5129
213	CDK14	CMGC:CDK:PFTAIRE	5218
214	CDK15	CMGC:CDK:PFTAIRE	65061
215	CDKL1	CMGC:CDKL:	8814
216	CDKL2	CMGC:CDKL:	8999
217	CDKL3	CMGC:CDKL:	51265
218	CDKL4	CMGC:CDKL:	344387
219	CDKL5	CMGC:CDKL:	6792
220	CSNK2A1	CMGC:CK2:	1457
221	CSNK2A2	CMGC:CK2:	1459
222	CLK1	CMGC:CLK:	1195
223	CLK2	CMGC:CLK:	1196
224	CLK3	CMGC:CLK:	1198
225	CLK4	CMGC:CLK:	57396
226	DYRK1A	CMGC:DYRK:DYRK1	1859
227	DYRK1B	CMGC:DYRK:DYRK1	9149
228	DYRK2	CMGC:DYRK:DYRK2	8445
229	DYRK3	CMGC:DYRK:DYRK2	8444
230	DYRK4	CMGC:DYRK:DYRK2	8798
231	HIPK1	CMGC:DYRK:HIPK	204851
232	HIPK2	CMGC:DYRK:HIPK	15258
233	HIPK3	CMGC:DYRK:HIPK	10114
234	HIPK4	CMGC:DYRK:HIPK	147746
235	PRPF4B	CMGC:DYRK:PRP4	8899
236	GSK3A	CMGC:GSK:	2931
237	GSK3B	CMGC:GSK:	2932
238	MAPK1	CMGC:MAPK:ERK1	5594
239	MAPK3	CMGC:MAPK:ERK1	5595
240	MAPK4	CMGC:MAPK:ERK3	5596
241	MAPK6	CMGC:MAPK:ERK3	5597
242	MAPK7	CMGC:MAPK:ERK5	5598
243	MAPK15	CMGC:MAPK:ERK7	332110
244	MAPK10	CMGC:MAPK:JNK	5602
245	MAPK8	CMGC:MAPK:JNK	5599
246	MAPK9	CMGC:MAPK:JNK	5601
247	NLK	CMGC:MAPK:nmo	51701
248	MAPK11	CMGC:MAPK:p38	5600
249	MAPK12	CMGC:MAPK:p38	6300
250	MAPK13	CMGC:MAPK:p38	5603
251	MAPK14	CMGC:MAPK:p38	1432
252	CILK1	CMGC:RCK:MAK	22858
253	MAK	CMGC:RCK:MAK	4117
254	MOK	CMGC:RCK:MOK	5891
255	SRPK1	CMGC:SRPK:	6732
256	SRPK2	CMGC:SRPK:	6733
257	SRPK3	CMGC:SRPK:	26576
258	NME1	NDK:NDK:	4830
259	NME2	NDK:NDK:	4831
260	NME3	NDK:NDK:	4832
261	NME4	NDK:NDK:	4833
262	NME5	NDK:NDK:	8382
263	NME6	NDK:NDK:	10201
264	NME7	NDK:NDK:	29922
265	NME9	NDK:NDK:	347736
266	NME8	NDK:NDK:	51314
267	AURKA	Other:Aur:	6790
268	AURKB	Other:Aur:	9212
269	AURKC	Other:Aur:	6795
270	BUB1	Other:BUB:	699
271	BUB1B	Other:BUB:	701
272	TP53RK	Other:Bud32:	112858
273	CAMKK1	Other:CAMKK:CAMKK-Meta	84254
274	CAMKK2	Other:CAMKK:CAMKK-Meta	10645
275	CDC7	Other:CDC7:	8317
276	DSTYK	Other:Dusty:	25778
277	HASPIN	Other:Haspin:	83903
278	CHUK	Other:IKK:	1147
279	IKBKB	Other:IKK:	3551
280	IKBKE	Other:IKK:	9641
281	TBK1	Other:IKK:	29110
282	ERN1	Other:IRE:	2081
283	ERN2	Other:IRE:	10595
284	UHMK1	Other:KIS:	127933
285	MOS	Other:MOS:	4342
286	AAK1	Other:NAK:BIKE	22848
287	BMP2K	Other:NAK:BIKE	55589
288	GAK	Other:NAK:GAK	2580
289	STK16	Other:NAK:MPSK	8576
290	NEK1	Other:NEK:NEK1	4750
291	NEK3	Other:NEK:NEK1	4752
292	NEK5	Other:NEK:NEK1	341676
293	NEK10	Other:NEK:NEK10	152110
294	NEK11	Other:NEK:NEK11	79858
295	NEK2	Other:NEK:NEK2	4751
296	NEK4	Other:NEK:NEK4	23955
297	NEK6	Other:NEK:NEK6	10783
298	NEK7	Other:NEK:NEK6	140609
299	NEK8	Other:NEK:NEK8	284086
300	NEK9	Other:NEK:NEK9	91754
301	SBK1	Other:NKF1:	388228
302	SBK2	Other:NKF1:	646643
303	SBK3	Other:NKF1:	100130827
304	PINK1	Other:NKF2:	65018
305	PEAK1	Other:NKF3:	79834
306	PRAG1	Other:NKF3:	157285
307	PDIK1L	Other:NKF4:	149420
308	STK35	Other:NKF4:	140901
309	TEX14	Other:NKF5:	56155
310	NRBP1	Other:NRBP:	29959
311	NRBP2	Other:NRBP:	223649
312	RNASEL	Other:Other-Unique:	6041
313	SGK196	Other:Other-Unique:	84197
314	STK31	Other:Other-Unique:	56164
315	PAN3	Other:PAN3:	255967
316	EIF2AK4	Other:PEK:GCN2 STE:STE-Unique:	27103
317	EIF2AK1	Other:PEK:HRI	27102
318	EIF2AK3	Other:PEK:PEK	9451
319	EIF2AK2	Other:PEK:PKR	5610
320	PLK1	Other:PLK:PLK1	5347
321	PLK2	Other:PLK:PLK2	10769
322	PLK3	Other:PLK:PLK2	1263
323	PLK4	Other:PLK:SAK	10733
324	SCYL1	Other:SCY1:	57410
325	SCYL2	Other:SCY1:	55681
326	SCYL3	Other:SCY1:	57147
327	C9orf96	Other:SgK071:	169436
328	PKDCC	Other:SgK493:	91461
329	PXK	Other:Slob:	54899
330	TBCK	Other:TBCK:	93627
331	TLK1	Other:TLK:	9874
332	TLK2	Other:TLK:	11011
333	PBK	Other:TOPK:	55872
334	TTK	Other:TTK:	7272
335	STK36	Other:ULK:Fused	27148
336	ULK1	Other:ULK:ULK	8408
337	ULK2	Other:ULK:ULK	9706
338	ULK3	Other:ULK:ULK	25989
339	ULK4	Other:ULK:ULK	54986
340	PIK3R4	Other:VPS15:	30849
341	PKMYT1	Other:WEE:Myt1	9088
342	WEE2-AS1	Other:WEE:WEE1	285962
343	WEE1	Other:WEE:WEE1	7465
344	WNK1	Other:WNK:	65125
345	WNK2	Other:WNK:	65268
346	WNK3	Other:WNK:	65267
347	WNK4	Other:WNK:	65266
348	FAM198A	PKL:FJ:	729085
349	FAM198B	PKL:FJ:	51313
350	FAM20A	PKL:FJ:	54757
351	FAM20B	PKL:FJ:	9917
352	FAM20C	PKL:FJ:	56975
353	FJX1	PKL:FJ:	24147
354	GUCY2C	RGC:RGC:	2984
355	GUCY2D	RGC:RGC:	3000
356	GUCY2F	RGC:RGC:	2986
357	NPR1	RGC:RGC:	4881
358	NPR2	RGC:RGC:	4882
359	MAP3K15	STE:STE11:ASK	389840
360	MAP3K5	STE:STE11:ASK	4217
361	MAP3K6	STE:STE11:ASK	9064
362	MAP3K1	STE:STE11:MEKK1	4214
363	YSK4	STE:STE11:MEKK15	80122
364	MAP3K2	STE:STE11:MEKK2	10746
365	MAP3K3	STE:STE11:MEKK2	4215
366	MAP3K4	STE:STE11:MEKK4	4216
367	OXSR1	STE:STE20:FRAY	9943
368	STK39	STE:STE20:FRAY	27347
369	MAP4K1	STE:STE20:KHS	11184
370	MAP4K2	STE:STE20:KHS	5871
371	MAP4K3	STE:STE20:KHS	8491
372	MAP4K5	STE:STE20:KHS	11183
373	MAP4K4	STE:STE20:MSN	26921
374	MINK1	STE:STE20:MSN	50488
375	NRK	STE:STE20:MSN	203447
376	TNIK	STE:STE20:MSN	23043
377	STK3	STE:STE20:MST	6788
378	STK4	STE:STE20:MST	58231
379	MYO3A	STE:STE20:NinaC	53904
380	MYO3B	STE:STE20:NinaC	329421
381	PAK1	STE:STE20:PAKA	5058
382	PAK2	STE:STE20:PAKA	5062
383	PAK3	STE:STE20:PAKA	5063
384	PAK4	STE:STE20:PAKB	10298
385	PAK6	STE:STE20:PAKB	56924
386	PAK5	STE:STE20:PAKB	57144
387	SLK	STE:STE20:SLK	9748
388	STK10	STE:STE20:SLK	6793
389	STRADA	STE:STE20:STLK	92335
390	STRADB	STE:STE20:STLK	55437
391	TAOK1	STE:STE20:TAO	57551
392	TAOK2	STE:STE20:TAO	9344
393	TAOK3	STE:STE20:TAO	51347
394	MST4	STE:STE20:YSK	51765
395	STK24	STE:STE20:YSK	8428
396	STK25	STE:STE20:YSK	10494
397	MAP2K1	STE:STE7:MEK1	5604
398	MAP2K2	STE:STE7:MEK1	5605
399	MAP2K3	STE:STE7:MEK3	5606
400	MAP2K6	STE:STE7:MEK3	5608
401	MAP2K4	STE:STE7:MEK4	6416
402	MAP2K5	STE:STE7:MEK5	5607
403	MAP2K7	STE:STE7:MEK7	5609
404	MAP3K14	STE:STE-Unique:	9020
405	MAP3K8	STE:STE-Unique:	1326
406	ABL1	TK:Abl:	25
407	ABL2	TK:Abl:	27
408	TNK1	TK:Ack:	8711
409	TNK2	TK:Ack:	10188
410	ALK	TK:ALK:	238
411	LTK	TK:ALK:	4058
412	AXL	TK:Axl:	558
413	MERTK	TK:Axl:	10461
414	TYRO3	TK:Axl:	7301
415	PTK7	TK:CCK4:	5754
416	CSK	TK:Csk:	1445
417	MATK	TK:Csk:	4145
418	DDR1	TK:DDR:	780
419	DDR2	TK:DDR:	4921
420	EGFR	TK:EGFR:	1956
421	ERBB2	TK:EGFR:	2064
422	ERBB3	TK:EGFR:	2065
423	ERBB4	TK:EGFR:	2066
424	EPHA1	TK:Eph:	2041
425	EPHA10	TK:Eph:	284656
426	EPHA2	TK:Eph:	1969
427	EPHA3	TK:Eph:	2042
428	EPHA4	TK:Eph:	2043
429	EPHA5	TK:Eph:	13839
430	EPHA6	TK:Eph:	13840
431	EPHA7	TK:Eph:	2045
432	EPHA8	TK:Eph:	2046
433	EPHB1	TK:Eph:	2047
434	EPHB2	TK:Eph:	2048
435	EPHB3	TK:Eph:	2049
436	EPHB4	TK:Eph:	2050
437	EPHB6	TK:Eph:	2051
438	PTK2	TK:FAK:	5747
439	PTK2B	TK:FAK:	2185
440	FER	TK:Fer:	2241
441	FES	TK:Fer:	2242
442	FGFR1	TK:FGFR:	2260
443	FGFR2	TK:FGFR:	2263
444	FGFR3	TK:FGFR:	2261
445	FGFR4	TK:FGFR:	2264
446	IGF1R	TK:InsR:	3480
447	INSR	TK:InsR:	3643
448	INSRR	TK:InsR:	3645
449	JAK1	TK:Jak: TK:JakB:	3716
450	JAK2	TK:Jak: TK:JakB:	3717
451	JAK3	TK:Jak: TK:JakB:	3718
452	TYK2	TK:Jak: TK:JakB:	7297
453	AATK	TK:Lmr:	9625
454	LMTK2	TK:Lmr:	22853
455	LMTK3	TK:Lmr:	114783
456	MET	TK:Met:	4233
457	MST1R	TK:Met:	4486
458	MUSK	TK:Musk:	4593
459	CSF1R	TK:PDGFR:	1436
460	FLT3	TK:PDGFR:	2322
461	KIT	TK:PDGFR:	3815
462	PDGFRA	TK:PDGFR:	5156
463	PDGFRB	TK:PDGFR:	5159
464	RET	TK:Ret:	5979
465	ROR1	TK:Ror:	4919
466	ROR2	TK:Ror:	4920
467	RYK	TK:Ryk:	6259
468	ROS1	TK:Sev:	6098
469	FRK	TK:Src:Frk	2444
470	FGR	TK:Src:SrcA	2268
471	FYN	TK:Src:SrcA	2534
472	SRC	TK:Src:SrcA	6714
473	YES1	TK:Src:SrcA	7525
474	BLK	TK:Src:SrcB	640
475	HCK	TK:Src:SrcB	3055
476	LCK	TK:Src:SrcB	3932
477	LYN	TK:Src:SrcB	4067
478	PTK6	TK:Src:SRM	5753
479	SRMS	TK:Src:SRM	6725
480	SYK	TK:Syk:	6850
481	ZAP70	TK:Syk:	7535
482	BMX	TK:Tec:	660
483	BTK	TK:Tec:	695
484	ITK	TK:Tec:	3702
485	TEC	TK:Tec:	7006
486	TXK	TK:Tec:	7294
487	TEK	TK:Tie:	7010
488	TIE1	TK:Tie:	7075
489	STYK1	TK:TK-Unique:	55359
490	NTRK1	TK:Trk:	4914
491	NTRK2	TK:Trk:	4915
492	NTRK3	TK:Trk:	4916
493	FLT1	TK:VEGFR:	2321
494	FLT4	TK:VEGFR:	2324
495	KDR	TK:VEGFR:	3791
496	IRAK1	TKL:IRAK:	3654
497	IRAK2	TKL:IRAK:	3656
498	IRAK3	TKL:IRAK:	11213
499	IRAK4	TKL:IRAK:	51135
500	LIMK1	TKL:LISK:LIMK	3984
501	LIMK2	TKL:LISK:LIMK	3985
502	TESK1	TKL:LISK:TESK	7016
503	TESK2	TKL:LISK:TESK	10420
504	LRRK1	TKL:LRRK:	79705
505	LRRK2	TKL:LRRK:	120892
506	TNNI3K	TKL:MLK:HH498	51086
507	ILK	TKL:MLK:ILK	3611
508	MAP3K12	TKL:MLK:LZK	7786
509	MAP3K13	TKL:MLK:LZK	9175
510	MAP3K21	TKL:MLK:MLK	84451
511	MAP3K10	TKL:MLK:MLK	4294
512	MAP3K11	TKL:MLK:MLK	4296
513	MAP3K9	TKL:MLK:MLK	4293
514	MAP3K7	TKL:MLK:TAK1	6885
515	MAP3K20	TKL:MLK:ZAK	51776
516	KSR1	TKL:RAF:KSR	8844
517	KSR2	TKL:RAF:KSR	283455
518	ARAF	TKL:RAF:RAF	369
519	BRAF	TKL:RAF:RAF	673
520	RAF1	TKL:RAF:RAF	5894
521	ANKK1	TKL:RIPK:	255239
522	RIPK1	TKL:RIPK:	8737
523	RIPK2	TKL:RIPK:	8767
524	RIPK3	TKL:RIPK:	11035
525	RIPK4	TKL:RIPK:	54101
526	ACVR1	TKL:STKR:STKR1	90
527	ACVR1B	TKL:STKR:STKR1	91
528	ACVR1C	TKL:STKR:STKR1	130399
529	ACVRL1	TKL:STKR:STKR1	94
530	BMPR1A	TKL:STKR:STKR1	657
531	BMPR1B	TKL:STKR:STKR1	658
532	TGFBR1	TKL:STKR:STKR1	7046
533	ACVR2A	TKL:STKR:STKR2	92
534	ACVR2B	TKL:STKR:STKR2	93
535	AMHR2	TKL:STKR:STKR2	269
536	BMPR2	TKL:STKR:STKR2	659
537	TGFBR2	TKL:STKR:STKR2	7048
538	MLKL	TKL:TKL-Unique:	197259

## Sheet: plasmid library of the kinome
#	Position	Official Symbol	Classification	Gene ID	Vector	Tag position	Bacterial resistence	Species	HeLa expression by WB	5' seq	3' seq	seq note	Source
1	1A1	AKT1	AGC:Akt:	207	pLX304/CMV/Flag	C	Ampicillin	Homo sapiens	High	Match	Match		hORFeome v3.1
2	1A2	AKT2	AGC:Akt:	208	pXN-HA-Flag	N	Ampicillin	Homo sapiens	High	Match	Match		Ultimate™ ORF Clone LITE Collection
3	1A3	AKT3	AGC:Akt:	10000	pXN-HA-Flag	N	Ampicillin	Homo sapiens	Median	Match	Match	transcript variant 3	Ultimate™ ORF Clone LITE Collection
4	1A4	CIT	AGC:DMPK:CRIK	11113	pXN-HA-Flag	N	Ampicillin	Homo sapiens		Match	Match		Ultimate™ ORF Clone LITE Collection
5	1A5	CDC42BPA	AGC:DMPK:GEK	8476	pcDNA-C-Myc	C	Ampicillin	Homo sapiens	Low	Match	Match		Others
6	1A6	CDC42BPB	AGC:DMPK:GEK	9578	pXN-HA-Flag	N	Ampicillin	Homo sapiens		Match	Match		Ultimate™ ORF Clone LITE Collection
7	1A7	CDC42BPG	AGC:DMPK:GEK	55561	pXN-HA-Flag	N	Ampicillin	Homo sapiens	Low	Match	Match		Ultimate™ ORF Clone LITE Collection
8	1A8	DMPK	AGC:DMPK:GEK	1760	pXN-HA-Flag	N	Ampicillin	Homo sapiens	Low	Match	Match		Ultimate™ ORF Clone LITE Collection
9	1A9	ROCK1	AGC:DMPK:ROCK	6093	pCAG-Myc	N	Ampicillin	Homo sapiens		Match	Match		Others
11	1A11	GRK2	AGC:GRK:BARK	156	pLX304/CMV/Flag	C	Ampicillin	Homo sapiens	High	Match	Match		hORFeome v3.1
12	1A12	GRK3	AGC:GRK:BARK	157	pXN-HA-Flag	N	Ampicillin	Homo sapiens		Match	Match		Ultimate™ ORF Clone LITE Collection
13	1B1	GRK1	AGC:GRK:GRK	6011	pXN-HA-Flag	N	Ampicillin	Homo sapiens		Match	Match		Ultimate™ ORF Clone LITE Collection
14	1B2	GRK4	AGC:GRK:GRK	2868	pXN-HA-Flag	N	Ampicillin	Homo sapiens		Match	Match		Ultimate™ ORF Clone LITE Collection
16	1B4	GRK6	AGC:GRK:GRK	2870	pcDNA-C-Myc	C	Ampicillin	Homo sapiens		Match	Match		Others
17	1B5	GRK7	AGC:GRK:GRK	131890	pLX304/CMV/Flag	C	Ampicillin	Homo sapiens	High	Match	Match		hORFeome v3.1
18	1B6	MAST1	AGC:MAST:MAST	56527	pXN-HA-Flag	N	Ampicillin	Mus musculus		Match	Match		Ultimate™ ORF Clone LITE Collection
19	1B7	MAST2	AGC:MAST:MAST	23139	pcDNA-C-Flag	C	Ampicillin	Homo sapiens		70aa insertion between A35 and H36	Match		Others
21	1B9	MAST4	AGC:MAST:MAST	375449	pXN-HA-Flag	N	Ampicillin	Homo sapiens	High	Match	Match	transcript variant 2	Ultimate™ ORF Clone LITE Collection
22	1B10	MASTL	AGC:MAST:MASTL	84930	pXN-HA-Flag	N	Ampicillin	Homo sapiens	Median	Match	Q708 missing		Ultimate™ ORF Clone LITE Collection
23	1B11	LATS1	AGC:NDR:LATS	9113	pcDNA3-HA-Lats1	N	Ampicillin	Homo sapiens		Match	Match		Others
24	1B12	LATS2	AGC:NDR:LATS	26524	pcDNA3-HA-Lats2	N	Ampicillin	Mus musculus		Match	Match		Others
25	1C1	STK38	AGC:NDR:NDR	11329	pLX304/CMV/Flag	C	Ampicillin	Homo sapiens	Median	Match	Match		hORFeome v3.1
26	1C2	STK38L	AGC:NDR:NDR	23012	pXN-HA-Flag	N	Ampicillin	Homo sapiens	Median	Match	Match		Ultimate™ ORF Clone LITE Collection
27	1C3	PDPK1	AGC:PDK1:	5170	pLX304/CMV/Flag	C	Ampicillin	Homo sapiens	Median	Match	Match	transcript variant 2	hORFeome v3.1
28	1C4	PRKACA	AGC:PKA:	5566	pLX304/CMV/Flag	C	Ampicillin	Homo sapiens	Low	Match	Match		hORFeome v3.1
29	1C5	PRKACB	AGC:PKA:	5567	pLX304/CMV/Flag	C	Ampicillin	Homo sapiens	Low	H159N, L163I	15bp deletion between 765 and 781	transcript variant3;insert sequence GTCCGATTCCCATCC	hORFeome v3.1
30	1C6	PRKACG	AGC:PKA:	5568	pXN-HA-Flag	N	Ampicillin	Homo sapiens	None	Match	Match		Ultimate™ ORF Clone LITE Collection
31	1C7	PRKX	AGC:PKA:	5613	pXN-HA-Flag	N	Ampicillin	Homo sapiens	High	Match	Match		Ultimate™ ORF Clone LITE Collection
33	1C9	PRKCA	AGC:PKC:PKCa	5578	pLX304/CMV/Flag	C	Ampicillin	Homo sapiens	High	Match	Match		hORFeome v3.1
34	1C10	PRKCB	AGC:PKC:PKCa	5579	pLX304/CMV/Flag	C	Ampicillin	Homo sapiens	High	Match	Match		hORFeome v3.1
35	1C11	PRKCG	AGC:PKC:PKCa	5582	pHACE-PKCγ-HA	C	Ampicillin	Mus musculus		Match			Others
36	1C12	PRKCD	AGC:PKC:PKCd	5580	pXN-HA-Flag	N	Ampicillin	Homo sapiens	Low	Match	Match		Ultimate™ ORF Clone LITE Collection
37	1D1	PRKCQ	AGC:PKC:PKCd	5588	pXN-HA-Flag	N	Ampicillin	Homo sapiens	Median	Match	Match	transcript variant 1	Ultimate™ ORF Clone LITE Collection
38	1D2	PRKCE	AGC:PKC:PKCh	5581	pLX304/CMV/Flag	C	Ampicillin	Homo sapiens	High	Match	Match		hORFeome v3.1
39	1D3	PRKCH	AGC:PKC:PKCh	5583	pLX304/CMV/Flag	C	Ampicillin	Homo sapiens	High	Match	T559M		hORFeome v3.1
40	1D4	PRKCI	AGC:PKC:PKCi	5584	pXN-HA-Flag	N	Ampicillin	Homo sapiens	Median	Match	Match		Ultimate™ ORF Clone LITE Collection
41	1D5	PRKCZ	AGC:PKC:PKCi	5590	pLX304/CMV/Flag	C	Ampicillin	Homo sapiens	High	Match	Match		hORFeome v3.1
42	1D6	PRKG1	AGC:PKG:	5592	pXN-HA-Flag	N	Ampicillin	Homo sapiens		Match	Match		Ultimate™ ORF Clone LITE Collection
43	1D7	PRKG2	AGC:PKG:	5593	pLX304/CMV/Flag	C	Ampicillin	Homo sapiens	Median	Match	Match		hORFeome v3.1
44	1D8	PKN1	AGC:PKN:	5585	pXN-HA-Flag	N	Ampicillin	Homo sapiens	High	Match	Match	transcript variant 2	Ultimate™ ORF Clone LITE Collection
45	1D9	PKN2	AGC:PKN:	5586	pXN-HA-Flag	N	Ampicillin	Homo sapiens	Low	Match	Match		Ultimate™ ORF Clone LITE Collection
46	1D10	PKN3	AGC:PKN:	29941	pXN-HA-Flag	N	Ampicillin	Homo sapiens	High	A180G	Match		Ultimate™ ORF Clone LITE Collection
47	1D11	RPS6KA4	AGC:RSK:MSK CAMK:RSKb:MSKb	8986	pRK7-HA-MSK2	N	Ampicillin	Homo sapiens		Match	Match		Others
48	1D12	RPS6KA5	AGC:RSK:MSK CAMK:RSKb:MSKb	9252	pLX304/CMV/Flag	C	Ampicillin	Homo sapiens	Low	Match	Match	transcript variant 2	hORFeome v3.1
49	1E1	RPS6KB1	AGC:RSK:RSKp70	6198	pXN-HA-Flag	N	Ampicillin	Homo sapiens	High	Match	S330I		Ultimate™ ORF Clone LITE Collection
50	1E2	RPS6KB2	AGC:RSK:RSKp70	6199	pXC-Flag	C	Ampicillin	Homo sapiens		Match	A430V		hORFeome v3.1
51	1E3	RPS6KA1	AGC:RSK:RSKp90 CAMK:RSKb:RSKb	6195	pXN-HA-Flag	N	Ampicillin	Homo sapiens	High	Match	Match		Ultimate™ ORF Clone LITE Collection
52	1E4	RPS6KA2	AGC:RSK:RSKp90 CAMK:RSKb:RSKb	6196	pcDNA-C-Flag	C	Ampicillin	Homo sapiens		Match	Match		Others
53	1E5	RPS6KA3	AGC:RSK:RSKp90 CAMK:RSKb:RSKb	6197	pLX304/CMV/Flag	C	Ampicillin	Homo sapiens	Median	Match	Match		hORFeome v3.1
54	1E6	RPS6KA6	AGC:RSK:RSKp90 CAMK:RSKb:RSKb	27330	pLX304/CMV/Flag	C	Ampicillin	Homo sapiens	Median	Match	Match		hORFeome v3.1
56	1E8	RPS6KL1	AGC:RSKL:	83694	pcDNA-C-Flag	C	Ampicillin	Homo sapiens		deletion from 131aa to 161aa	Match		Others
58	1E10	SGK1	AGC:SGK:	6446	N-HA-S422D	N	Ampicillin	Homo sapiens		Match			Others
59	1E11	SGK2	AGC:SGK:	10110	pLX304/CMV/Flag	C	Ampicillin	Homo sapiens	High	Match	Match	multiple peaks between 410bp and 420bp	hORFeome v3.1
60	1E12	SGK3	AGC:SGK:	23678	pXN-HA-Flag	N	Ampicillin	Homo sapiens	Median	Match	Match		Ultimate™ ORF Clone LITE Collection
61	1F1	STK32A	AGC:YANK:	202374	pLX304/CMV/Flag	C	Ampicillin	Homo sapiens	Low	Match	Match	transcript variant 2	hORFeome v3.1
62	1F2	STK32B	AGC:YANK:	55351	pXN-HA-Flag	N	Ampicillin	Homo sapiens	High	R198G	Match		Ultimate™ ORF Clone LITE Collection
63	1F3	STK32C	AGC:YANK:	57740	pXN-HA-Flag	N	Ampicillin	Mus musculus		Match	Match		Ultimate™ ORF Clone LITE Collection
64	1F4	ADCK3	Atypical:ABC1:ABC1-A	56997	pXN-HA-Flag	N	Ampicillin	Homo sapiens		Match	Match		Ultimate™ ORF Clone LITE Collection
65	1F5	ADCK4	Atypical:ABC1:ABC1-A	79934	pcDNA-C-Flag	C	Ampicillin	Homo sapiens		Match	Match		Others
66	1F6	ADCK1	Atypical:ABC1:ABC1-B	57143	pXN-HA-Flag	N	Ampicillin	Homo sapiens		Match	Match		Ultimate™ ORF Clone LITE Collection
67	1F7	ADCK2	Atypical:ABC1:ABC1-C	90956	pXC-Flag	C	Ampicillin	Homo sapiens		Match	Match		hORFeome v3.1
70	1F10	ALPK2	Atypical:Alpha:Alpha-Unclassified	115701	pXN-HA-Flag	N	Ampicillin	Homo sapiens		Match	Match		Ultimate™ ORF Clone LITE Collection
74	1G2	EEF2K	Atypical:Alpha:eEF2K	29904	pLX304/CMV/Flag	C	Ampicillin	Homo sapiens	High	Match	Match		hORFeome v3.1
77	1G5	ABR	Atypical:BCR:	29	pXN-HA-Flag	N	Ampicillin	Homo sapiens	High	Match	Match		Ultimate™ ORF Clone LITE Collection
78	1G6	BCR	Atypical:BCR:	613	pXN-HA-Flag	N	Ampicillin	Homo sapiens	Median	Match	Match		Ultimate™ ORF Clone LITE Collection
79	1G7	BLVRA	Atypical:BLVRA:	644	pXN-HA-Flag	N	Ampicillin	Homo sapiens	High	Match	Match		Ultimate™ ORF Clone LITE Collection
80	1G8	BRD2	Atypical:BRD:	6046	pXN-HA-Flag	N	Ampicillin	Homo sapiens	Median	Match	Match		Ultimate™ ORF Clone LITE Collection
81	1G9	BRD3	Atypical:BRD:	8019	pXN-HA-Flag	N	Ampicillin	Homo sapiens		Match	Match		Ultimate™ ORF Clone LITE Collection
82	1G10	BRD4	Atypical:BRD:	23476	pCMV-Flag-BRD4	N	Ampicillin	Homo sapiens		Match	Match		Others
83	1G11	BRDT	Atypical:BRD:	676	pXN-HA-Flag	N	Ampicillin	Homo sapiens	Low	Match	Match		Ultimate™ ORF Clone LITE Collection
84	1G12	CERT1	Atypical:Col4A3BP:	10087	pLX304/CMV/Flag	C	Ampicillin	Homo sapiens	Median	Match	Match	transcript variant 2	hORFeome v3.1
85	1H1	FASTK	Atypical:FAST:	10922	pLX304/CMV/Flag	C	Ampicillin	Homo sapiens	Median	Match	V435L		hORFeome v3.1
86	1H2	STK19	Atypical:G11:	8859	pXN-HA-Flag	N	Ampicillin	Homo sapiens	Median	Match	Match		Ultimate™ ORF Clone LITE Collection
87	1H3	GTF2F1	Atypical:GTF2F1:	2962	pXN-HA-Flag	N	Ampicillin	Homo sapiens	High	Match	Match		Ultimate™ ORF Clone LITE Collection
88	1H4	BCKDK	Atypical:PDHK:BCKDK	10295	pLX304/CMV/Flag	C	Ampicillin	Homo sapiens	High	Match	Match		hORFeome v3.1
89	1H5	PDK1	Atypical:PDHK:PDHK	5163	pLX304/CMV/Flag	C	Ampicillin	Homo sapiens	Median	Match	Match		hORFeome v3.1
90	1H6	PDK2	Atypical:PDHK:PDHK	5164	pXN-HA-Flag	N	Ampicillin	Homo sapiens	Median	Match	Match		Ultimate™ ORF Clone LITE Collection
91	1H7	PDK3	Atypical:PDHK:PDHK	5165	pLX304/CMV/Flag	C	Ampicillin	Homo sapiens	Median	Match	Match	transcript variant 2	hORFeome v3.1
92	1H8	PDK4	Atypical:PDHK:PDHK	5166	pXC-Flag	C	Ampicillin	Homo sapiens	Low	Match	Q342P		hORFeome v3.1
94	1H10	ATR	Atypical:PIKK:ATR	545	pXN-HA-Flag	N	Ampicillin	Homo sapiens		Match	Match		Ultimate™ ORF Clone LITE Collection
96	1H12	MTOR	Atypical:PIKK:FRAP	2475	pRK5-Myc	N	Ampicillin	Rattus norvegicus		Match			Others
99	2A3	RIOK1	Atypical:RIO:RIO1	83732	pLX304/CMV/Flag	C	Ampicillin	Homo sapiens	Median	Match	Match		hORFeome v3.1
100	2A4	RIOK2	Atypical:RIO:RIO2	55781	pXN-HA-Flag	N	Ampicillin	Homo sapiens	Median	H144Y	Match		Ultimate™ ORF Clone LITE Collection
101	2A5	RIOK3	Atypical:RIO:RIO3	8780	pLX304/CMV/Flag	C	Ampicillin	Homo sapiens	Median	Match	Match		hORFeome v3.1
102	2A6	TAF1	Atypical:TAF1:	6872	pXN-HA-Flag	N	Ampicillin	Homo sapiens		Match	Match		Ultimate™ ORF Clone LITE Collection
103	2A7	TAF1L	Atypical:TAF1:	138474	pCMV-Tag2A-HA-TAF1L	N	Kanamycin	Homo sapiens		Match			Others
104	2A8	TRIM24	Atypical:TIF1:	8805	pXN-HA-Flag	N	Ampicillin	Homo sapiens	Median	Match	Match		Ultimate™ ORF Clone LITE Collection
108	2A12	CAMK1	CAMK:CAMK1:	8536	pLX304/CMV/Flag	C	Ampicillin	Homo sapiens	High	Match	Match		hORFeome v3.1
109	2B1	CAMK1D	CAMK:CAMK1:	57118	pLX304/CMV/Flag	C	Ampicillin	Homo sapiens	High	Match	Match	transcript variant 2	hORFeome v3.1
110	2B2	CAMK1G	CAMK:CAMK1:	57172	pcDNA-C-Flag	C	Ampicillin	Homo sapiens		Match	Match		Others
111	2B3	CAMK4	CAMK:CAMK1:	814	pXN-HA-Flag	N	Ampicillin	Homo sapiens	Median	Match	Match		Ultimate™ ORF Clone LITE Collection
112	2B4	PNCK	CAMK:CAMK1:	93843	pXN-HA-Flag	N	Ampicillin	Mus musculus		Match	Match		Ultimate™ ORF Clone LITE Collection
113	2B5	CAMK2A	CAMK:CAMK2:	815	pLX304/CMV/Flag	C	Ampicillin	Homo sapiens	Median	Match	Match	transcript variant 2	hORFeome v3.1
114	2B6	CAMK2B	CAMK:CAMK2:	816	pLX304/CMV/Flag	C	Ampicillin	Homo sapiens	High	Match	Match	transcript variant 5	hORFeome v3.1
115	2B7	CAMK2D	CAMK:CAMK2:	817	pLX304/CMV/Flag	C	Ampicillin	Homo sapiens	Median	Match	Match		hORFeome v3.1
116	2B8	CAMK2G	CAMK:CAMK2:	818	pXN-HA-Flag	N	Ampicillin	Homo sapiens	Median	S36P	Match	transcript variant 2	Ultimate™ ORF Clone LITE Collection
117	2B9	PRKAA1	CAMK:CAMKL:AMPK	5562	pcDNA3-HA	N	Ampicillin	Homo sapiens		Match	Match		Others
118	2B10	PRKAA2	CAMK:CAMKL:AMPK	5563	pLX304/CMV/Flag	C	Ampicillin	Homo sapiens	Low	Match	Match		hORFeome v3.1
119	2B11	BRSK1	CAMK:CAMKL:BRSK	84446	pEBG2T-GST-HA	N	Ampicillin	Homo sapiens		Match, ATG removed		N-terminal HA tag immediately before gene	Others
120	2B12	BRSK2	CAMK:CAMKL:BRSK	9024	pLX304/CMV/Flag	C	Ampicillin	Homo sapiens	High	Match	Match	transcript variant 2	hORFeome v3.1
121	2C1	CHEK1	CAMK:CAMKL:CHK1	1111	pXN-HA-Flag	N	Ampicillin	Homo sapiens	Median	Match	Match		Ultimate™ ORF Clone LITE Collection
123	2C3	STK11	CAMK:CAMKL:LKB	6794	pLX304/CMV/Flag	C	Ampicillin	Homo sapiens	High	Match	Match		hORFeome v3.1
124	2C4	MARK1	CAMK:CAMKL:MARK	4139	pXN-HA-Flag	N	Ampicillin	Homo sapiens	Low	Match	Match		Ultimate™ ORF Clone LITE Collection
125	2C5	MARK2	CAMK:CAMKL:MARK	2011	pXN-HA-Flag	N	Ampicillin	Homo sapiens		Match	Match		Ultimate™ ORF Clone LITE Collection
126	2C6	MARK3	CAMK:CAMKL:MARK	4140	MARK3-HA	C	Ampicillin	Homo sapiens		Match			Others
127	2C7	MARK4	CAMK:CAMKL:MARK	57787	pRK7-N-Flag-WT	N	Ampicillin	Homo sapiens		Match	Match	missing exon 16 close to the C-term	Others
128	2C8	MELK	CAMK:CAMKL:MELK	9833	pEBG2T-GST-HA	N	Ampicillin	Homo sapiens		Match, ATG removed		N-term HA tag before gene	Others
129	2C9	NIM1K	CAMK:CAMKL:NIM1	167359	pXN-HA-Flag	N	Ampicillin	Homo sapiens	Low	Match	Match		Ultimate™ ORF Clone LITE Collection
131	2C11	NUAK2	CAMK:CAMKL:NuaK	81788	pXN-HA-Flag	N	Ampicillin	Homo sapiens	Median	Match	R442C		Ultimate™ ORF Clone LITE Collection
132	2C12	PASK	CAMK:CAMKL:PASK	23178	Myc-PASK	N	Ampicillin	Homo sapiens		Match			Others
133	2D1	SIK1	CAMK:CAMKL:QIK	150094	pLX304/CMV/Flag	C	Ampicillin	Homo sapiens	Median	Match	P616S, P617L		hORFeome v3.1
135	2D3	SIK3	CAMK:CAMKL:QIK	23387	pXN-HA-Flag	N	Ampicillin	Homo sapiens	Median	Match	Match	transcript variant 2	Ultimate™ ORF Clone LITE Collection
136	2D4	SNRK	CAMK:CAMKL:SNRK	54861	pXN-HA-Flag	N	Ampicillin	Homo sapiens	Low	Match	K722R		Ultimate™ ORF Clone LITE Collection
137	2D5	CAMKV	CAMK:CAMK-Unique:	79012	pLX304/CMV/Flag	C	Ampicillin	Homo sapiens	High	Match	Y491C		hORFeome v3.1
138	2D6	CASK	CAMK:CASK:	8573	pLX304/CMV/Flag	C	Ampicillin	Homo sapiens	Low	Match	Match		hORFeome v3.1
139	2D7	DAPK1	CAMK:DAPK:DAPK	1612	pLX304/CMV/Flag	C	Ampicillin	Homo sapiens	Median	Match	Match		hORFeome v3.1
140	2D8	DAPK2	CAMK:DAPK:DAPK	23604	pLX304/CMV/Flag	C	Ampicillin	Homo sapiens	High	Match	Match		hORFeome v3.1
141	2D9	DAPK3	CAMK:DAPK:DAPK	1613	pXN-HA-Flag	N	Ampicillin	Homo sapiens	High	Match	Match		Ultimate™ ORF Clone LITE Collection
142	2D10	STK17A	CAMK:DAPK:DRAK	9263	pXN-HA-Flag	N	Ampicillin	Homo sapiens	Median	Match	Match		Ultimate™ ORF Clone LITE Collection
143	2D11	STK17B	CAMK:DAPK:DRAK	9262	pXN-HA-Flag	N	Ampicillin	Homo sapiens		Match	Match		Ultimate™ ORF Clone LITE Collection
145	2E1	DCLK2	CAMK:DCAMKL:	166614	pXC-Flag	C	Ampicillin	Homo sapiens		Match	Match	size seems to be close to correct. May be start from a alternate ATG	hORFeome v3.1
146	2E2	DCLK3	CAMK:DCAMKL:	85443	pXN-HA-Flag	N	Ampicillin	Homo sapiens	High	Match	Match		Ultimate™ ORF Clone LITE Collection
147	2E3	MAPKAPK2	CAMK:MAPKAPK:MK2	9261	pXN-HA-Flag	N	Ampicillin	Homo sapiens	High	Match	Match	transcript variant 2	Ultimate™ ORF Clone LITE Collection
148	2E4	MAPKAPK3	CAMK:MAPKAPK:MK2	7867	pLX304/CMV/Flag	C	Ampicillin	Homo sapiens	High	Match	Match		hORFeome v3.1
149	2E5	MAPKAPK5	CAMK:MAPKAPK:MK5	8550	pXN-HA-Flag	N	Ampicillin	Homo sapiens	High	Match	Match		Ultimate™ ORF Clone LITE Collection
150	2E6	MKNK1	CAMK:MAPKAPK:MNK	8569	pLX304/CMV/Flag	C	Ampicillin	Homo sapiens	Median	Match	Match	transcript variant 1	hORFeome v3.1
151	2E7	MKNK2	CAMK:MAPKAPK:MNK	2872	pXN-HA-Flag	N	Ampicillin	Homo sapiens	High	Match	Match		Ultimate™ ORF Clone LITE Collection
154	2E10	MYLK3	CAMK:MLCK:	91807	pLX304/CMV/Flag	C	Ampicillin	Homo sapiens	Median	Match	Match		hORFeome v3.1
157	2F1	PHKG1	CAMK:PHK:	5260	pXN-HA-Flag	N	Ampicillin	Homo sapiens	Median	Match	Match	transcript variant 2	Ultimate™ ORF Clone LITE Collection
158	2F2	PHKG2	CAMK:PHK:	5261	pcDNA-C-Flag	C	Ampicillin	Homo sapiens		Match	Match		Others
159	2F3	PIM1	CAMK:PIM:	5292	pXN-HA-Flag	N	Ampicillin	Homo sapiens	Median	Match	Match	transcript variant 1	Ultimate™ ORF Clone LITE Collection
160	2F4	PIM2	CAMK:PIM:	11040	pLX304/CMV/Flag	C	Ampicillin	Homo sapiens	Median	Match	Match		hORFeome v3.1
161	2F5	PIM3	CAMK:PIM:	415116	pcDNA-C-Flag	C	Ampicillin	Homo sapiens		Match	Match		Others
162	2F6	PRKD1	CAMK:PKD:	5587	pXN-HA-Flag	N	Ampicillin	Homo sapiens	Median	Match	Match		Ultimate™ ORF Clone LITE Collection
163	2F7	PRKD2	CAMK:PKD:	25865	pLX304/CMV/Flag	C	Ampicillin	Homo sapiens	High	Match	Match		hORFeome v3.1
164	2F8	PRKD3	CAMK:PKD:	23683	pXN-HA-Flag	N	Ampicillin	Homo sapiens		Match	Match		Ultimate™ ORF Clone LITE Collection
165	2F9	PSKH1	CAMK:PSK:	5681	pcDNA-C-Flag	C	Ampicillin	Homo sapiens		Match	Match		Others
166	2F10	PSKH2	CAMK:PSK:	85481	pXN-HA-Flag	N	Ampicillin	Homo sapiens		Match	Match		Ultimate™ ORF Clone LITE Collection
167	2F11	CHEK2	CAMK:RAD53:	11200	pXN-HA-Flag	N	Ampicillin	Homo sapiens	High	Match	Match		Ultimate™ ORF Clone LITE Collection
168	2F12	STK40	CAMK:SgK495:	83931	pLX304/CMV/Flag	C	Ampicillin	Homo sapiens	Median	Match	Match		hORFeome v3.1
169	2G1	STK33	CAMK:STK33:	65975	pLX304/CMV/Flag	C	Ampicillin	Homo sapiens	Low	Match	C437D, C451Y, K513E		hORFeome v3.1
170	2G2	TRIB1	CAMK:Trbl:	10221	pXN-HA-Flag	N	Ampicillin	Homo sapiens	Median	Match	Match		Ultimate™ ORF Clone LITE Collection
171	2G3	TRIB2	CAMK:Trbl:	28951	pLX304/CMV/Flag	C	Ampicillin	Homo sapiens	Low	Match	Match		hORFeome v3.1
172	2G4	TRIB3	CAMK:Trbl:	57761	pXN-HA-Flag	N	Ampicillin	Homo sapiens	High	Match	Match		Ultimate™ ORF Clone LITE Collection
173	2G5	KALRN	CAMK:Trio:	8997	pXN-HA-Flag	N	Ampicillin	Homo sapiens		Match	Match	transcript variant 2	Ultimate™ ORF Clone LITE Collection
176	2G8	SPEG	CAMK:Trio: CAMK:Trio:	10290	pXN-HA-Flag	N	Ampicillin	Homo sapiens	High	Match	Match	transcript variant 4	Ultimate™ ORF Clone LITE Collection
177	2G9	TSSK1B	CAMK:TSSK:	83942	pXN-HA-Flag	N	Ampicillin	Homo sapiens	Low	Match	Match		Ultimate™ ORF Clone LITE Collection
178	2G10	TSSK2	CAMK:TSSK:	23617	pXN-HA-Flag	N	Ampicillin	Homo sapiens	Median	Match	G304D		Ultimate™ ORF Clone LITE Collection
179	2G11	TSSK3	CAMK:TSSK:	81629	pXC-Flag	C	Ampicillin	Homo sapiens		Match	Match		hORFeome v3.1
181	2H1	TSSK6	CAMK:TSSK:	83983	pXN-HA-Flag	N	Ampicillin	Homo sapiens	Median	Match	Match		Ultimate™ ORF Clone LITE Collection
182	2H2	CSNK1A1	CK1:CK1:CK1-A	1452	pXN-HA-Flag	N	Ampicillin	Homo sapiens	Low	Match	Match		Ultimate™ ORF Clone LITE Collection
183	2H3	CSNK1A1L	CK1:CK1:CK1-A	122011	pXN-HA-Flag	N	Ampicillin	Homo sapiens	Low	D42E	R225K		Ultimate™ ORF Clone LITE Collection
184	2H4	CSNK1D	CK1:CK1:CK1-D	1453	pcDNA-C-Flag	C	Ampicillin	Homo sapiens		Match	Match		Others
185	2H5	CSNK1E	CK1:CK1:CK1-D	1454	pLX304/CMV/Flag	C	Ampicillin	Homo sapiens	Median	Match	Match		hORFeome v3.1
186	2H6	CSNK1G1	CK1:CK1:CK1-G	53944	CSNK1G1-Myc	C	Ampicillin	Mus musculus		Match			Others
188	2H8	CSNK1G3	CK1:CK1:CK1-G	1456	pcDNA-C-Myc	C	Ampicillin	Homo sapiens	Low	Match	Match	transcript variant 2	Others
189	2H9	TTBK1	CK1:TTBK:	84630	pXN-HA-Flag	N	Ampicillin	Homo sapiens		Match	Match		Ultimate™ ORF Clone LITE Collection
191	2H11	VRK1	CK1:VRK:	7443	pLX304/CMV/Flag	C	Ampicillin	Homo sapiens	High	Match	Match		hORFeome v3.1
192	2H12	VRK2	CK1:VRK:	7444	pXN-HA-Flag	N	Ampicillin	Homo sapiens	Low	I167V	Match		Ultimate™ ORF Clone LITE Collection
193	3A1	VRK3	CK1:VRK:	51231	pXN-HA-Flag	N	Ampicillin	Homo sapiens		Match	Match		Ultimate™ ORF Clone LITE Collection
194	3A2	CDK20	CMGC:CDK:CCRK	23552	pLX304/CMV/Flag	C	Ampicillin	Homo sapiens	Median	Match	Match	transcript variant 4	hORFeome v3.1
195	3A3	CDK1	CMGC:CDK:CDC2	983	pLX304/CMV/Flag	C	Ampicillin	Homo sapiens	Median	Match	Match	transcript variant 1	hORFeome v3.1
196	3A4	CDK10	CMGC:CDK:CDK10	8558	pLX304/CMV/Flag	C	Ampicillin	Homo sapiens	High	Match	Match		hORFeome v3.1
199	3A7	CDK2	CMGC:CDK:CDK2	1017	pLX304/CMV/Flag	C	Ampicillin	Homo sapiens	Median	Match	Match		hORFeome v3.1
200	3A8	CDK3	CMGC:CDK:CDK2	1018	pLX304/CMV/Flag	C	Ampicillin	Homo sapiens	Median	Match	Match		hORFeome v3.1
201	3A9	CDK4	CMGC:CDK:CDK4	1019	pLX304/CMV/Flag	C	Ampicillin	Homo sapiens	High	Match	Match		hORFeome v3.1
202	3A10	CDK6	CMGC:CDK:CDK4	1021	pLX304/CMV/Flag	C	Ampicillin	Homo sapiens	High	Match	Match		hORFeome v3.1
203	3A11	CDK5	CMGC:CDK:CDK5	1020	pLX304/CMV/Flag	C	Ampicillin	Homo sapiens	Median	Match	Match		hORFeome v3.1
204	3A12	CDK7	CMGC:CDK:CDK7	1022	pXN-HA-Flag	N	Ampicillin	Homo sapiens	Median	the 130aa CAA to CGA	Match		Ultimate™ ORF Clone LITE Collection
205	3B1	CDK19	CMGC:CDK:CDK8	23097	pcDNA3.1 N-Flag/Hygro	N	Ampicillin	Homo sapiens		Match	Match		Others
206	3B2	CDK8	CMGC:CDK:CDK8	1024	pXN-HA-Flag	N	Ampicillin	Homo sapiens	Median	Match	Match		Ultimate™ ORF Clone LITE Collection
207	3B3	CDK9	CMGC:CDK:CDK9	1025	pLX304/CMV/Flag	C	Ampicillin	Homo sapiens	Median	Match	Match		hORFeome v3.1
208	3B4	CDK12	CMGC:CDK:CRK7	51755	pXN-HA-Flag	N	Ampicillin	Homo sapiens	Low	Match	Match		Ultimate™ ORF Clone LITE Collection
209	3B5	CDK13	CMGC:CDK:CRK7	8621	pXN-HA-Flag	N	Ampicillin	Homo sapiens		Match	Match		Ultimate™ ORF Clone LITE Collection
210	3B6	CDK16	CMGC:CDK:PCTAIRE	5127	pLX304/CMV/Flag	C	Ampicillin	Homo sapiens	Median	Unmatchable with the first 6aa	Match		hORFeome v3.1
211	3B7	CDK17	CMGC:CDK:PCTAIRE	5128	pLX304/CMV/FLAG	C	Ampicillin	Homo sapiens	Low	Match	Match	transcript variant 1	hORFeome v3.1
212	3B8	CDK18	CMGC:CDK:PCTAIRE	5129	pXN-HA-Flag	N	Ampicillin	Homo sapiens		Match	Match		Ultimate™ ORF Clone LITE Collection
213	3B9	CDK14	CMGC:CDK:PFTAIRE	5218	pXN-HA-Flag	N	Ampicillin	Homo sapiens	Median	Match	Match		Ultimate™ ORF Clone LITE Collection
214	3B10	CDK15	CMGC:CDK:PFTAIRE	65061	pXN-HA-Flag	N	Ampicillin	Homo sapiens		Match	Match	transcript variant 3	Ultimate™ ORF Clone LITE Collection
215	3B11	CDKL1	CMGC:CDKL:	8814	pcDNA-C-Flag	C	Ampicillin	Homo sapiens		Match	Match		Others
216	3B12	CDKL2	CMGC:CDKL:	8999	pXN-HA-Flag	N	Ampicillin	Homo sapiens	Median	Match	Match		Ultimate™ ORF Clone LITE Collection
217	3C1	CDKL3	CMGC:CDKL:	51265	pXN-HA-Flag	N	Ampicillin	Homo sapiens	Low	Match	Match		Ultimate™ ORF Clone LITE Collection
218	3C2	CDKL4	CMGC:CDKL:	344387	pLX304/CMV/FLAG	C	Ampicillin	Homo sapiens	None	Match	Match		hORFeome v3.1
220	3C4	CSNK2A1	CMGC:CK2:	1457	pLX304/CMV/Flag	C	Ampicillin	Homo sapiens	Low	Match	Match	transcript variant 1	hORFeome v3.1
221	3C5	CSNK2A2	CMGC:CK2:	1459	pXN-HA-Flag	N	Ampicillin	Homo sapiens	High	Match	Match		Ultimate™ ORF Clone LITE Collection
222	3C6	CLK1	CMGC:CLK:	1195	pXN-HA-Flag	N	Ampicillin	Homo sapiens	Low	Match	Match	transcript variant 1	Ultimate™ ORF Clone LITE Collection
223	3C7	CLK2	CMGC:CLK:	1196	pLX304/CMV/Flag	C	Ampicillin	Homo sapiens	Low	Match	Match		hORFeome v3.1
224	3C8	CLK3	CMGC:CLK:	1198	pLX304/CMV/Flag	C	Ampicillin	Homo sapiens	Median	Match	Match	transcript variant 2	hORFeome v3.1
225	3C9	CLK4	CMGC:CLK:	57396	pXN-HA-Flag	N	Ampicillin	Homo sapiens	Median	Match	Match		Ultimate™ ORF Clone LITE Collection
226	3C10	DYRK1A	CMGC:DYRK:DYRK1	1859	HA-DYRK1A	N	Ampicillin	Rattus norvegicus		Match		Rat transcript variant X5	Others
227	3C11	DYRK1B	CMGC:DYRK:DYRK1	9149	pLX304/CMV/Flag	C	Ampicillin	Homo sapiens	High	Match	Match		hORFeome v3.1
228	3C12	DYRK2	CMGC:DYRK:DYRK2	8445	HA-DYRK2	N	Ampicillin	Homo sapiens	None	Match			Others
229	3D1	DYRK3	CMGC:DYRK:DYRK2	8444	pXN-HA-Flag	N	Ampicillin	Homo sapiens	Low	Match	Match	transcript variant 2	Ultimate™ ORF Clone LITE Collection
230	3D2	DYRK4	CMGC:DYRK:DYRK2	8798	pXN-HA-Flag	N	Ampicillin	Homo sapiens	Low	Match	Match		Ultimate™ ORF Clone LITE Collection
231	3D3	HIPK1	CMGC:DYRK:HIPK	204851	pXN-HA-Flag	N	Ampicillin	Homo sapiens	Low	Match	A660V	transcript variant 4	Ultimate™ ORF Clone LITE Collection
232	3D4	HIPK2	CMGC:DYRK:HIPK	15258	pXN-HA-Flag	N	Ampicillin	Mus musculus		Match	Match		Ultimate™ ORF Clone LITE Collection
233	3D5	HIPK3	CMGC:DYRK:HIPK	10114	pXN-HA-Flag	N	Ampicillin	Homo sapiens	None	Match	Match		Ultimate™ ORF Clone LITE Collection
234	3D6	HIPK4	CMGC:DYRK:HIPK	147746	pXN-HA-Flag	N	Ampicillin	Homo sapiens	Median	Match	Match		Ultimate™ ORF Clone LITE Collection
235	3D7	PRPF4B	CMGC:DYRK:PRP4	8899	pXN-HA-Flag	N	Ampicillin	Homo sapiens	Low	I83E	Match		Ultimate™ ORF Clone LITE Collection
236	3D8	GSK3A	CMGC:GSK:	2931	pLX304/CMV/Flag	C	Ampicillin	Homo sapiens	High	Match	Match		hORFeome v3.1
237	3D9	GSK3B	CMGC:GSK:	2932	pXN-HA-Flag	N	Ampicillin	Homo sapiens	Median	Match	Match		Ultimate™ ORF Clone LITE Collection
238	3D10	MAPK1	CMGC:MAPK:ERK1	5594	pXN-HA-Flag	N	Ampicillin	Homo sapiens	High	Match	Match		Ultimate™ ORF Clone LITE Collection
239	3D11	MAPK3	CMGC:MAPK:ERK1	5595	pcDNA-C-Flag	C	Ampicillin	Homo sapiens		Match	Match		Others
240	3D12	MAPK4	CMGC:MAPK:ERK3	5596	pXN-HA-Flag	N	Ampicillin	Homo sapiens		V38M	Match		Ultimate™ ORF Clone LITE Collection
241	3E1	MAPK6	CMGC:MAPK:ERK3	5597	pXN-Myc-His	N	Ampicillin	Homo sapiens		Match	Match		Others
242	3E2	MAPK7	CMGC:MAPK:ERK5	5598	pXN-HA-Flag	N	Ampicillin	Homo sapiens		Match	Match		Ultimate™ ORF Clone LITE Collection
243	3E3	MAPK15	CMGC:MAPK:ERK7	332110	pXN-HA-Flag	N	Ampicillin	Mus musculus		Match	truncated after 330aa	Protein is truncated on the C-terminal, smaller than wt. full length 1650 bp. Match untill 992bp. So truncation after 330aa, Kinase domain 13-304aa.	Ultimate™ ORF Clone LITE Collection
244	3E4	MAPK10	CMGC:MAPK:JNK	5602	pXN-HA-Flag	N	Ampicillin	Homo sapiens	Median	Match	Match	transcript variant 1	Ultimate™ ORF Clone LITE Collection
245	3E5	MAPK8	CMGC:MAPK:JNK	5599	pLX304/CMV/Flag	C	Ampicillin	Homo sapiens	High	Match	Match	transcript variant JNK1-b2	hORFeome v3.1
246	3E6	MAPK9	CMGC:MAPK:JNK	5601	pXN-HA-Flag	N	Ampicillin	Homo sapiens	High	Match	Match	transcript variant JNK-a2	Ultimate™ ORF Clone LITE Collection
247	3E7	NLK	CMGC:MAPK:nmo	51701	pCMV-NLK-Flag	C	Ampicillin	Homo sapiens		Unmatchable with the first 13aa	Match		Others
248	3E8	MAPK11	CMGC:MAPK:p38	5600	pXN-HA-Flag	N	Ampicillin	Homo sapiens	High	Match	Match		Ultimate™ ORF Clone LITE Collection
249	3E9	MAPK12	CMGC:MAPK:p38	6300	pLX304/CMV/Flag	C	Ampicillin	Homo sapiens	High	Match	Match (potential mutiple peaks）		hORFeome v3.1
250	3E10	MAPK13	CMGC:MAPK:p38	5603	pLX304/CMV/Flag	C	Ampicillin	Homo sapiens	High	Match	Match		hORFeome v3.1
251	3E11	MAPK14	CMGC:MAPK:p38	1432	pLX304/CMV/Flag	C	Ampicillin	Homo sapiens	High	Match	Match	transcript variant 2	hORFeome v3.1
252	3E12	CILK1	CMGC:RCK:MAK	22858	pXN-HA-Flag	N	Ampicillin	Homo sapiens	Low	Match	Match		Ultimate™ ORF Clone LITE Collection
253	3F1	MAK	CMGC:RCK:MAK	4117	pXN-HA-Flag	N	Ampicillin	Homo sapiens		Match	Match	transcript variant 1	Ultimate™ ORF Clone LITE Collection
254	3F2	MOK	CMGC:RCK:MOK	5891	pXN-HA-Flag	N	Ampicillin	Homo sapiens		Match	Match	transcript variant 2	Ultimate™ ORF Clone LITE Collection
255	3F3	SRPK1	CMGC:SRPK:	6732	pLX304/CMV/Flag	C	Ampicillin	Homo sapiens	Low	I210N	Match		hORFeome v3.1
256	3F4	SRPK2	CMGC:SRPK:	6733	pXN-HA-Flag	N	Ampicillin	Homo sapiens	High	Match	Match		Ultimate™ ORF Clone LITE Collection
257	3F5	SRPK3	CMGC:SRPK:	26576	pLX304/CMV/Flag	C	Ampicillin	Homo sapiens	Low	Match	Match	transcript variant 2	hORFeome v3.1
258	3F6	NME1	NDK:NDK:	4830	pLX304/CMV/Flag	C	Ampicillin	Homo sapiens	High	Match	Match	transcript variant 2	hORFeome v3.1
259	3F7	NME2	NDK:NDK:	4831	pLX304/CMV/Flag	C	Ampicillin	Homo sapiens	High	Match	Match	transcript variant 1	hORFeome v3.1
260	3F8	NME3	NDK:NDK:	4832	pXN-HA-Flag	N	Ampicillin	Homo sapiens		Match	Match		Ultimate™ ORF Clone LITE Collection
261	3F9	NME4	NDK:NDK:	4833	pXN-HA-Flag	N	Ampicillin	Homo sapiens	Median	Match	Match		Ultimate™ ORF Clone LITE Collection
262	3F10	NME5	NDK:NDK:	8382	pLX304/CMV/Flag	C	Ampicillin	Homo sapiens	Low	Match	no signal		hORFeome v3.1
263	3F11	NME6	NDK:NDK:	10201	pLX304/CMV/Flag	C	Ampicillin	Homo sapiens	High	Match	Match		hORFeome v3.1
264	3F12	NME7	NDK:NDK:	29922	pLX304/CMV/Flag	C	Ampicillin	Homo sapiens	Low	E5K	Match		hORFeome v3.1
266	3G2	NME8	NDK:NDK:	51314	pLX304/CMV/Flag	C	Ampicillin	Homo sapiens	High	C208R	Match (potential mutiple peaks）		hORFeome v3.1
267	3G3	AURKA	Other:Aur:	6790	pXN-HA-Flag	N	Ampicillin	Homo sapiens		I57V	Match		Ultimate™ ORF Clone LITE Collection
268	3G4	AURKB	Other:Aur:	9212	pLX304/CMV/Flag	C	Ampicillin	Homo sapiens	Median	Match	Match		hORFeome v3.1
269	3G5	AURKC	Other:Aur:	6795	pLX304/CMV/Flag	C	Ampicillin	Homo sapiens	Low	Match	Match		hORFeome v3.1
270	3G6	BUB1	Other:BUB:	699	pXN-HA-Flag	N	Ampicillin	Homo sapiens	Median	Match	Match		Ultimate™ ORF Clone LITE Collection
271	3G7	BUB1B	Other:BUB:	701	pXN-HA-Flag	N	Ampicillin	Homo sapiens	Median	Match	Match		Ultimate™ ORF Clone LITE Collection
272	3G8	TP53RK	Other:Bud32:	112858	pLX304/CMV/Flag	C	Ampicillin	Homo sapiens	Low	Match	Match		hORFeome v3.1
273	3G9	CAMKK1	Other:CAMKK:CAMKK-Meta	84254	pLX304/CMV/Flag	C	Ampicillin	Homo sapiens	High	Match	E413G	transcript variant 3	hORFeome v3.1
274	3G10	CAMKK2	Other:CAMKK:CAMKK-Meta	10645	pcDNA3-N-Flag	N	Ampicillin	Homo sapiens		Match	Match		Others
275	3G11	CDC7	Other:CDC7:	8317	pXC-Flag	C	Ampicillin	Homo sapiens		Match	Match		hORFeome v3.1
276	3G12	DSTYK	Other:Dusty:	25778	pLX304/CMV/Flag	C	Ampicillin	Homo sapiens	High	Match	Match	transcript variant 2	hORFeome v3.1
277	3H1	HASPIN	Other:Haspin:	83903	pXN-HA-Flag	N	Ampicillin	Homo sapiens	Median	R82G, G204D	Match		Ultimate™ ORF Clone LITE Collection
279	3H3	IKBKB	Other:IKK:	3551	pcDNA3-N-HA	N	Ampicillin	Homo sapiens		Match	Match		Others
280	3H4	IKBKE	Other:IKK:	9641	pLX304/CMV/Flag	C	Ampicillin	Homo sapiens	High	Match	Match		hORFeome v3.1
282	3H6	ERN1	Other:IRE:	2081	pXC-Flag	C	Ampicillin	Homo sapiens		Match	Match		hORFeome v3.1
283	3H7	ERN2	Other:IRE:	10595	pXC-Flag	C	Ampicillin	Homo sapiens		Match	Match		hORFeome v3.1
284	3H8	UHMK1	Other:KIS:	127933	pXN-HA-Flag	N	Ampicillin	Homo sapiens	Median	Match	I257T	transcript variant 3	Ultimate™ ORF Clone LITE Collection
285	3H9	MOS	Other:MOS:	4342	pXN-HA-Flag	N	Ampicillin	Homo sapiens		Match	Match		Ultimate™ ORF Clone LITE Collection
286	3H10	AAK1	Other:NAK:BIKE	22848	HA-AAK1	N	Ampicillin	Mus musculus		Match			Others
287	3H11	BMP2K	Other:NAK:BIKE	55589	pXN-HA-Flag	N	Ampicillin	Homo sapiens		Match	Match	transcript variant 2	Ultimate™ ORF Clone LITE Collection
288	3H12	GAK	Other:NAK:GAK	2580	pEGFP-EGFP	N	Kanamycin	Homo sapiens		Match			Others
289	4A1	STK16	Other:NAK:MPSK	8576	pLX304/CMV/Flag	C	Ampicillin	Homo sapiens	High	Match	Match		hORFeome v3.1
290	4A2	NEK1	Other:NEK:NEK1	4750	pXN-HA-Flag	N	Ampicillin	Homo sapiens		Match	Match		Ultimate™ ORF Clone LITE Collection
291	4A3	NEK3	Other:NEK:NEK1	4752	pXN-HA-Flag	N	Ampicillin	Homo sapiens	Median	Match	Match		Ultimate™ ORF Clone LITE Collection
292	4A4	NEK5	Other:NEK:NEK1	341676	pXN-HA-Flag	N	Ampicillin	Homo sapiens	None	Match	Match		Ultimate™ ORF Clone LITE Collection
293	4A5	NEK10	Other:NEK:NEK10	152110	pXC-Flag	C	Ampicillin	Homo sapiens		Match	Match		hORFeome v3.1
294	4A6	NEK11	Other:NEK:NEK11	79858	pXN-HA-Flag	N	Ampicillin	Homo sapiens		Match	Match		Ultimate™ ORF Clone LITE Collection
296	4A8	NEK4	Other:NEK:NEK4	23955	pXN-HA-Flag	N	Ampicillin	Mus musculus		Match	Match		Ultimate™ ORF Clone LITE Collection
297	4A9	NEK6	Other:NEK:NEK6	10783	pLX304/CMV/Flag	C	Ampicillin	Homo sapiens	High	Match	Match	transcript variant 2 and 5	hORFeome v3.1
298	4A10	NEK7	Other:NEK:NEK6	140609	pLX304/CMV/Flag	C	Ampicillin	Homo sapiens	Median	Match	Match		hORFeome v3.1
299	4A11	NEK8	Other:NEK:NEK8	284086	pcDNA-C-Flag	C	Ampicillin	Homo sapiens		Match	Match		Others
300	4A12	NEK9	Other:NEK:NEK9	91754	pXN-HA-Flag	N	Ampicillin	Homo sapiens	Median	Match	Match		Ultimate™ ORF Clone LITE Collection
301	4B1	SBK1	Other:NKF1:	388228	pXN-HA-Flag	N	Ampicillin	Homo sapiens	High	Match	Match		Ultimate™ ORF Clone LITE Collection
302	4B2	SBK2	Other:NKF1:	646643	pXN-HA-Flag	N	Ampicillin	Homo sapiens		C72R	Match		Ultimate™ ORF Clone LITE Collection
304	4B4	PINK1	Other:NKF2:	65018	pXN-HA-Flag	N	Ampicillin	Homo sapiens	None	P209A	Match		Ultimate™ ORF Clone LITE Collection
305	4B5	PEAK1	Other:NKF3:	79834	pXN-HA-Flag	N	Ampicillin	Homo sapiens		Match	Match		Ultimate™ ORF Clone LITE Collection
310	4B10	NRBP1	Other:NRBP:	29959	pcDNA-C-Flag	C	Ampicillin	Homo sapiens		Match	Match		Others
311	4B11	NRBP2	Other:NRBP:	223649	pcDNA-C-Flag	C	Ampicillin	Homo sapiens		Match	Match		Others
312	4B12	RNASEL	Other:Other-Unique:	6041	pXN-HA-Flag	N	Ampicillin	Homo sapiens	Median	Match	Match		Ultimate™ ORF Clone LITE Collection
313	4C1	POMK	Other:Other-Unique:	84197	pLX304/CMV/Flag	C	Ampicillin	Homo sapiens	High	Match	Match		hORFeome v3.1
314	4C2	STK31	Other:Other-Unique:	56164	pXN-HA-Flag	N	Ampicillin	Homo sapiens	Median	Q71H, mutiple peaks after 183aa	Match		Ultimate™ ORF Clone LITE Collection
315	4C3	PAN3	Other:PAN3:	255967	pT7-EGFP-C1-HsPAN3	N	Kanamycin	Homo sapiens		the first 146aa missing	Match	miss the first 146aa (include a Zinc finger domain 43-71), OK after that,kinase domain intact (492-754)	Others
317	4C5	EIF2AK1	Other:PEK:HRI	27102	pXN-HA-Flag	N	Ampicillin	Homo sapiens		Match	Match		Ultimate™ ORF Clone LITE Collection
318	4C6	EIF2AK3	Other:PEK:PEK	9451	pXC-Flag	C	Ampicillin	Homo sapiens		Match	Match		hORFeome v3.1
319	4C7	EIF2AK2	Other:PEK:PKR	5610	pXN-HA-Flag	N	Ampicillin	Homo sapiens	Low	Match	Match		Ultimate™ ORF Clone LITE Collection
320	4C8	PLK1	Other:PLK:PLK1	5347	pXN-HA-Flag	N	Ampicillin	Homo sapiens	Low	Match	Match		Ultimate™ ORF Clone LITE Collection
321	4C9	PLK2	Other:PLK:PLK2	10769	HA-PLK2	N	Ampicillin	Homo sapiens		Match			Others
322	4C10	PLK3	Other:PLK:PLK2	1263	pEGFP-GFP-tag	N	Ampicillin	Homo sapiens		2-6aa missing	Match		Others
323	4C11	PLK4	Other:PLK:SAK	10733	pXN-HA-Flag	N	Ampicillin	Homo sapiens		Match	Match		Ultimate™ ORF Clone LITE Collection
324	4C12	SCYL1	Other:SCY1:	57410	pCMV-SPORT6-N-Flag	N	Ampicillin	Homo sapiens		Match			Others
325	4D1	SCYL2	Other:SCY1:	55681	pXN-HA-Flag	N	Ampicillin	Homo sapiens	Median	Match	Match		Ultimate™ ORF Clone LITE Collection
326	4D2	SCYL3	Other:SCY1:	57147	pLX304/CMV/Flag	C	Ampicillin	Homo sapiens	High	Match	G543A	transcript variant 1	hORFeome v3.1
327	4D3	STKLD1	Other:SgK071:	169436	pXN-HA-Flag	N	Ampicillin	Homo sapiens	Median	Match	Match		Ultimate™ ORF Clone LITE Collection
328	4D4	PKDCC	Other:SgK493:	91461	pcDNA-C-Flag	C	Ampicillin	Mus musculus		Match	Match		Others
329	4D5	PXK	Other:Slob:	54899	pXN-HA-FLAG	N	Ampicillin	Homo sapiens		Match	Match	transcript variantX3	Ultimate™ ORF Clone LITE Collection
330	4D6	TBCK	Other:TBCK:	93627	pXN-HA-Flag	N	Ampicillin	Homo sapiens	Median	Match	Match	transcript variant 4	Ultimate™ ORF Clone LITE Collection
331	4D7	TLK1	Other:TLK:	9874	pXC-Flag	C	Ampicillin	Homo sapiens		Match	Match		hORFeome v3.1
332	4D8	TLK2	Other:TLK:	11011	pXN-HA-Flag	N	Ampicillin	Homo sapiens	Low	Match	Match		Ultimate™ ORF Clone LITE Collection
333	4D9	PBK	Other:TOPK:	55872	pLX304/CMV/Flag	C	Ampicillin	Homo sapiens	High	Match	Match		hORFeome v3.1
334	4D10	TTK	Other:TTK:	7272	pXN-HA-Flag	N	Ampicillin	Homo sapiens	Median	Match	Match		Ultimate™ ORF Clone LITE Collection
335	4D11	STK36	Other:ULK:Fused	27148	pXN-HA-Flag	N	Ampicillin	Homo sapiens	Low	Match	Match		Ultimate™ ORF Clone LITE Collection
336	4D12	ULK1	Other:ULK:ULK	8408	Flag-ULK1	N	Ampicillin	Mus musculus		Match			Others
337	4E1	ULK2	Other:ULK:ULK	9706	pLX304/CMV/Flag	C	Ampicillin	Homo sapiens	Low	Match	Match		hORFeome v3.1
338	4E2	ULK3	Other:ULK:ULK	25989	pRK7-N-Flag	N	Ampicillin	Homo sapiens		Match	Match		Others
339	4E3	ULK4	Other:ULK:ULK	54986	pXN-HA-Flag	N	Ampicillin	Homo sapiens		Match	Match		Ultimate™ ORF Clone LITE Collection
340	4E4	PIK3R4	Other:VPS15:	30849	pXN-HA-Flag	N	Ampicillin	Homo sapiens		Match	Match		Ultimate™ ORF Clone LITE Collection
341	4E5	PKMYT1	Other:WEE:Myt1	9088	pXN-HA-Flag	N	Ampicillin	Homo sapiens	High	Match	Match		Ultimate™ ORF Clone LITE Collection
343	4E7	WEE1	Other:WEE:WEE1	7465	pXN-HA-Flag	N	Ampicillin	Homo sapiens	Median	Match	Match		Ultimate™ ORF Clone LITE Collection
345	4E9	WNK2	Other:WNK:	65268	pCMV-3XFlag-WNK2	N	Ampicillin	Homo sapiens		Match	Match		Others
347	4E11	WNK4	Other:WNK:	65266	pCMV-Myc-WNK4	N	Ampicillin	Homo sapiens		Match	Match		Others
348	4E12	FAM198A	PKL:FJ:	729085	pXN-HA-Flag	N	Ampicillin	Homo sapiens	Low	Match	Q460R		Ultimate™ ORF Clone LITE Collection
349	4F1	FAM198B	PKL:FJ:	51313	pXN-HA-Flag	N	Ampicillin	Homo sapiens		Match	G440S		Ultimate™ ORF Clone LITE Collection
350	4F2	FAM20A	PKL:FJ:	54757	pXN-HA-Flag	N	Ampicillin	Homo sapiens		Match	N332K, L530S		Ultimate™ ORF Clone LITE Collection
351	4F3	FAM20B	PKL:FJ:	9917	pXN-HA-Flag	N	Ampicillin	Homo sapiens	Median	Match	Match		Ultimate™ ORF Clone LITE Collection
352	4F4	FAM20C	PKL:FJ:	56975	pcDNA-C-Flag	C	Ampicillin	Homo sapiens		Match	Match		Others
353	4F5	FJX1	PKL:FJ:	24147	pXN-HA-Flag	N	Ampicillin	Homo sapiens	Low	Match	Match		Ultimate™ ORF Clone LITE Collection
354	4F6	GUCY2C	RGC:RGC:	2984	pXN-HA-Flag	N	Ampicillin	Homo sapiens		Match	Match		Ultimate™ ORF Clone LITE Collection
356	4F8	GUCY2F	RGC:RGC:	2986	pXN-HA-Flag	N	Ampicillin	Homo sapiens		Match	Match		Ultimate™ ORF Clone LITE Collection
358	4F10	NPR2	RGC:RGC:	4882	pcDNA-C-Flag	C	Ampicillin	Homo sapiens		Match	Match		Others
359	4F11	MAP3K15	STE:STE11:ASK	389840	pcDNA-C-Flag	C	Ampicillin	Homo sapiens		Match	Match		Others
360	4F12	MAP3K5	STE:STE11:ASK	4217	pLX304/CMV/Flag	C	Ampicillin	Homo sapiens	High	Match	Match		hORFeome v3.1
361	4G1	MAP3K6	STE:STE11:ASK	9064	pXN-HA-Flag	N	Ampicillin	Homo sapiens		Match	Match		Ultimate™ ORF Clone LITE Collection
364	4G4	MAP3K2	STE:STE11:MEKK2	10746	pXN-HA-Flag	N	Ampicillin	Homo sapiens		Match	Match		Ultimate™ ORF Clone LITE Collection
365	4G5	MAP3K3	STE:STE11:MEKK2	4215	pCMV-3XFlag-MEKK3	N	Ampicillin	Homo sapiens		Match	Match		Others
367	4G7	OXSR1	STE:STE20:FRAY	9943	pLX304/CMV/Flag	C	Ampicillin	Homo sapiens	High	Match	Match		hORFeome v3.1
368	4G8	STK39	STE:STE20:FRAY	27347	pXN-HA-Flag	N	Ampicillin	Homo sapiens	High	Match	Match		Ultimate™ ORF Clone LITE Collection
369	4G9	MAP4K1	STE:STE20:KHS	11184	pXN-HA-Flag	N	Ampicillin	Homo sapiens	Low	Match	Match		Ultimate™ ORF Clone LITE Collection
370	4G10	MAP4K2	STE:STE20:KHS	5871	pXN-HA-Flag	N	Ampicillin	Homo sapiens		Match	Match		Ultimate™ ORF Clone LITE Collection
371	4G11	MAP4K3	STE:STE20:KHS	8491	pcDNA-Flag	N	Ampicillin	Homo sapiens		missing most N-term 12 AA	Match		Others
372	4G12	MAP4K5	STE:STE20:KHS	11183	pXN-HA-Flag	N	Ampicillin	Homo sapiens	Low	Match	Match		Ultimate™ ORF Clone LITE Collection
373	4H1	MAP4K4	STE:STE20:MSN	26921	pXN-HA-Flag	N	Ampicillin	Mus musculus	None	Match	Match		Ultimate™ ORF Clone LITE Collection
374	4H2	MINK1	STE:STE20:MSN	50488	pXN-HA-Flag	N	Ampicillin	Homo sapiens		Match	Match		Ultimate™ ORF Clone LITE Collection
376	4H4	TNIK	STE:STE20:MSN	23043	HA-TNIK-PGW1	N	Ampicillin	Homo sapiens		Match	Match		Others
377	4H5	STK3	STE:STE20:MST	6788	pLX304/CMV/Flag	C	Ampicillin	Homo sapiens	High	Match	Match	transcript variant 1	hORFeome v3.1
378	4H6	STK4	STE:STE20:MST	58231	Flag-STK4	N	Ampicillin	Mus musculus		Match			Others
380	4H8	MYO3B	STE:STE20:NinaC	329421	pXN-HA-Flag	N	Ampicillin	Mus musculus		Match	Match		Ultimate™ ORF Clone LITE Collection
381	4H9	PAK1	STE:STE20:PAKA	5058	pcDNA-C-Flag	C	Ampicillin	Homo sapiens		Match	Match		Others
382	4H10	PAK2	STE:STE20:PAKA	5062	pXN-HA-Flag	N	Ampicillin	Homo sapiens	High	Match	stop mutation at 464aa	stop mutation	Ultimate™ ORF Clone LITE Collection
384	4H12	PAK4	STE:STE20:PAKB	10298	pLX304/CMV/Flag	C	Ampicillin	Homo sapiens	Median	Match	Match		hORFeome v3.1
385	5A1	PAK6	STE:STE20:PAKB	56924	pXN-HA-Flag	N	Ampicillin	Homo sapiens	High	Match	Match		Others
386	5A2	PAK5	STE:STE20:PAKB	57144	pLX304/CMV/Flag	C	Ampicillin	Homo sapiens	Median	P21A	Match	transcript variant 1	hORFeome v3.1
387	5A3	SLK	STE:STE20:SLK	9748	Flag-SLK	N	Ampicillin	Homo sapiens		Match			Others
388	5A4	STK10	STE:STE20:SLK	6793	pXC-Flag	C	Ampicillin	Homo sapiens		G62A, V136E	Match		hORFeome v3.1
389	5A5	STRADA	STE:STE20:STLK	92335	HA-STRADA	N	Ampicillin	Homo sapiens		Match	Match		Others
391	5A7	TAOK1	STE:STE20:TAO	57551	pRK5-N-Myc	N	Ampicillin	Homo sapiens		Match	Match		Others
392	5A8	TAOK2	STE:STE20:TAO	9344	pXC-Flag	C	Ampicillin	Homo sapiens		M189T	Match		hORFeome v3.1
393	5A9	TAOK3	STE:STE20:TAO	51347	pLX304/CMV/Flag	C	Ampicillin	Homo sapiens		Match	Match		Others
394	5A10	STK26	STE:STE20:YSK	51765	pXN-HA-Flag	N	Ampicillin	Homo sapiens	High	Match	Match		Ultimate™ ORF Clone LITE Collection
395	5A11	STK24	STE:STE20:YSK	8428	pLX304/CMV/Flag	C	Ampicillin	Homo sapiens	High	Match	Match	transcript variant 2	hORFeome v3.1
396	5A12	STK25	STE:STE20:YSK	10494	pLX304/CMV/Flag	C	Ampicillin	Homo sapiens	High	Match	Match		hORFeome v3.1
397	5B1	MAP2K1	STE:STE7:MEK1	5604	pLX304/CMV/Flag	C	Ampicillin	Homo sapiens	High	Match	Match		hORFeome v3.1
398	5B2	MAP2K2	STE:STE7:MEK1	5605	pLX304/CMV/Flag	C	Ampicillin	Homo sapiens	High	Match	Match		hORFeome v3.1
399	5B3	MAP2K3	STE:STE7:MEK3	5606	pXN-HA-Flag	N	Ampicillin	Homo sapiens	High	Match	Match		Ultimate™ ORF Clone LITE Collection
400	5B4	MAP2K6	STE:STE7:MEK3	5608	pLX304/CMV/Flag	C	Ampicillin	Homo sapiens	High	Match	Match		hORFeome v3.1
401	5B5	MAP2K4	STE:STE7:MEK4	6416	pXN-HA-Flag	N	Ampicillin	Homo sapiens	High	R16R	P356L	transcript variant 1	Ultimate™ ORF Clone LITE Collection
402	5B6	MAP2K5	STE:STE7:MEK5	5607	pLX304/CMV/Flag	C	Ampicillin	Homo sapiens	Median	Match	Match	transcript variant 1	hORFeome v3.1
403	5B7	MAP2K7	STE:STE7:MEK7	5609	pcDNA-Flag	N	Ampicillin	Mus musculus		Match	Match		Others
404	5B8	MAP3K14	STE:STE-Unique:	9020	pXN-HA-Flag	N	Ampicillin	Homo sapiens	Median	Match	Match		Ultimate™ ORF Clone LITE Collection
405	5B9	MAP3K8	STE:STE-Unique:	1326	pXN-HA-Flag	N	Ampicillin	Homo sapiens	Median	Match	Match		Ultimate™ ORF Clone LITE Collection
406	5B10	ABL1	TK:Abl:	25	pLX304/CMV/Flag	C	Ampicillin	Homo sapiens	Low	Match	Match		hORFeome v3.1
407	5B11	ABL2	TK:Abl:	27	pXN-HA-Flag	N	Ampicillin	Homo sapiens	High	Match	Match		Ultimate™ ORF Clone LITE Collection
408	5B12	TNK1	TK:Ack:	8711	pcDNA-C-Flag	C	Ampicillin	Homo sapiens		Match	Match		Others
409	5C1	TNK2	TK:Ack:	10188	pXC-Flag	C	Ampicillin	Homo sapiens	Median	Match	Match		hORFeome v3.1
410	5C2	ALK	TK:ALK:	238	pXN-HA-FLAG	N	Ampicillin	Homo sapiens		Match	Match		Ultimate™ ORF Clone LITE Collection
412	5C4	AXL	TK:Axl:	558	pcDNA-C-Flag	C	Ampicillin	Homo sapiens		Match	Match		Others
413	5C5	MERTK	TK:Axl:	10461	pXC-Flag	C	Ampicillin	Homo sapiens	Median	Match	Match		hORFeome v3.1
414	5C6	TYRO3	TK:Axl:	7301	pLX304/CMV/Flag	C	Ampicillin	Homo sapiens	High	P21L	L819M,M824G		hORFeome v3.1
415	5C7	PTK7	TK:CCK4:	5754	pXN-HA-Flag	N	Ampicillin	Homo sapiens		Match	Match		Ultimate™ ORF Clone LITE Collection
416	5C8	CSK	TK:Csk:	1445	pLX304/CMV/Flag	C	Ampicillin	Homo sapiens	High	Match	Match		hORFeome v3.1
417	5C9	MATK	TK:Csk:	4145	pLX304/CMV/Flag	C	Ampicillin	Homo sapiens	Median	Match	Match	transcript variant 1	hORFeome v3.1
418	5C10	DDR1	TK:DDR:	780	pLX304/CMV/Flag	C	Ampicillin	Homo sapiens	High	Match	Match		hORFeome v3.1
419	5C11	DDR2	TK:DDR:	4921	pLX304/CMV/Flag	C	Ampicillin	Homo sapiens	Low	Match	Match		hORFeome v3.1
420	5C12	EGFR	TK:EGFR:	1956	pLX304/CMV/Flag	C	Ampicillin	Homo sapiens	Median	Match	Match	transcript variant 1	hORFeome v3.1
421	5D1	ERBB2	TK:EGFR:	2064	pLX304/CMV/Flag	C	Ampicillin	Homo sapiens	Median	Match	Match	transcript variant 1	hORFeome v3.1
422	5D2	ERBB3	TK:EGFR:	2065	pLX304/CMV/Flag	C	Ampicillin	Homo sapiens	None	Match	Match		hORFeome v3.1
423	5D3	ERBB4	TK:EGFR:	2066	pLX304/CMV/Flag	C	Ampicillin	Homo sapiens	None	Match	Match	transcript variant 1	hORFeome v3.1
424	5D4	EPHA1	TK:Eph:	2041	pLX304/CMV/Flag	C	Ampicillin	Homo sapiens	Median	V160A	M 900V		hORFeome v3.1
425	5D5	EPHA10	TK:Eph:	284656	pXN-HA-Flag	N	Ampicillin	Homo sapiens	Low	Match	Match	transcript variant 2	Ultimate™ ORF Clone LITE Collection
426	5D6	EPHA2	TK:Eph:	1969	pLX304/CMV/Flag	C	Ampicillin	Homo sapiens	Median	Match	Match		hORFeome v3.1
427	5D7	EPHA3	TK:Eph:	2042	pXN-HA-Flag	N	Ampicillin	Homo sapiens		Match	Match		Ultimate™ ORF Clone LITE Collection
428	5D8	EPHA4	TK:Eph:	2043	pcDNA-C-Flag	C	Ampicillin	Homo sapiens		Match	Match		Others
429	5D9	EPHA5	TK:Eph:	13839	pcDNA-C-Myc	C	Ampicillin	Mus musculus		Match	Match		Others
430	5D10	EPHA6	TK:Eph:	13840	pXN-HA-Flag	N	Ampicillin	Mus musculus		Match	Match		Ultimate™ ORF Clone LITE Collection
432	5D12	EPHA8	TK:Eph:	2046	pLX304/CMV/Flag	C	Ampicillin	Homo sapiens	High	Match	Match	transcript variant 2	hORFeome v3.1
433	5E1	EPHB1	TK:Eph:	2047	pLX304/CMV/Flag	C	Ampicillin	Homo sapiens	None	Match	Match		hORFeome v3.1
435	5E3	EPHB3	TK:Eph:	2049	pXN-HA-Flag	N	Ampicillin	Homo sapiens		Match	Match		Ultimate™ ORF Clone LITE Collection
437	5E5	EPHB6	TK:Eph:	2051	pXN-HA-Flag	N	Ampicillin	Homo sapiens		Match	Match		Ultimate™ ORF Clone LITE Collection
438	5E6	PTK2	TK:FAK:	5747	pLX304/CMV/Flag	C	Ampicillin	Homo sapiens	High	Match	Match		hORFeome v3.1
439	5E7	PTK2B	TK:FAK:	2185	pXN-HA-Flag	N	Ampicillin	Homo sapiens	High	Match	M985V		Ultimate™ ORF Clone LITE Collection
441	5E9	FES	TK:Fer:	2242	pLX304/CMV/Flag	C	Ampicillin	Homo sapiens	High	Match	Match		hORFeome v3.1
442	5E10	FGFR1	TK:FGFR:	2260	pXC-Flag	C	Ampicillin	Homo sapiens		W211G	Match		hORFeome v3.1
444	5E12	FGFR3	TK:FGFR:	2261	pLX304/CMV/Flag	C	Ampicillin	Homo sapiens	High	Match	Match		hORFeome v3.1
445	5F1	FGFR4	TK:FGFR:	2264	pXN-HA-Flag	N	Ampicillin	Homo sapiens		Match	Match		Ultimate™ ORF Clone LITE Collection
446	5F2	IGF1R	TK:InsR:	3480	pXN-HA-Flag	N	Ampicillin	Homo sapiens		Match	Match		Ultimate™ ORF Clone LITE Collection
447	5F3	INSR	TK:InsR:	3643	pXC-Flag	C	Ampicillin	Homo sapiens		A2G	Match		hORFeome v3.1
448	5F4	INSRR	TK:InsR:	3645	pXC-Flag	C	Ampicillin	Homo sapiens	None	Match	Match		hORFeome v3.1
449	5F5	JAK1	TK:Jak: TK:JakB:	3716	pXN-HA-Flag	N	Ampicillin	Homo sapiens	Low	Match	Match		Ultimate™ ORF Clone LITE Collection
451	5F7	JAK3	TK:Jak: TK:JakB:	3718	pcDNA-C-Flag	C	Ampicillin	Homo sapiens		Match	Match		Others
452	5F8	TYK2	TK:Jak: TK:JakB:	7297	pLX304/CMV/Flag	C	Ampicillin	Homo sapiens	Low	Match	S1017A		hORFeome v3.1
454	5F10	LMTK2	TK:Lmr:	22853	pcDNA-C-Flag	C	Ampicillin	Homo sapiens		Match	Unmatchable after 1443aa		Others
456	5F12	MET	TK:Met:	4233	pXN-HA-Flag	N	Ampicillin	Homo sapiens		Match	Match	transcript variant 1	Ultimate™ ORF Clone LITE Collection
457	5G1	MST1R	TK:Met:	4486	pLX304/CMV/Flag	C	Ampicillin	Homo sapiens	Low	Match	Match	transcript variant 2	hORFeome v3.1
458	5G2	MUSK	TK:Musk:	4593	pXC-Flag	C	Ampicillin	Homo sapiens		Match	Match		hORFeome v3.1
461	5G5	KIT	TK:PDGFR:	3815	pXN-HA-Flag	N	Ampicillin	Homo sapiens	None	Match	P838H		Ultimate™ ORF Clone LITE Collection
462	5G6	PDGFRA	TK:PDGFR:	5156	pLX304/CMV/Flag	C	Ampicillin	Homo sapiens	Low	Match	Match		hORFeome v3.1
463	5G7	PDGFRB	TK:PDGFR:	5159	pXN-HA-Flag	N	Ampicillin	Homo sapiens		Match	Match		Ultimate™ ORF Clone LITE Collection
464	5G8	RET	TK:Ret:	5979	pcDNA-C-3XFlag	C	Ampicillin	Homo sapiens		Match	Match		Others
465	5G9	ROR1	TK:Ror:	4919	pLX304/CMV/Flag	C	Ampicillin	Homo sapiens	High	Match	Match	transcript variant 2	hORFeome v3.1
466	5G10	ROR2	TK:Ror:	4920	pLX304/CMV/Flag	C	Ampicillin	Homo sapiens	High	Match	Match		hORFeome v3.1
467	5G11	RYK	TK:Ryk:	6259	pXN-HA-Flag	N	Ampicillin	Homo sapiens		Match	Match		Ultimate™ ORF Clone LITE Collection
468	5G12	ROS1	TK:Sev:	6098	pXN-HA-Flag	N	Ampicillin	Homo sapiens		Match	Match		Ultimate™ ORF Clone LITE Collection
469	5H1	FRK	TK:Src:Frk	2444	pLX304/CMV/Flag	C	Ampicillin	Homo sapiens	Median	Match	Match		hORFeome v3.1
470	5H2	FGR	TK:Src:SrcA	2268	pLX304/CMV/Flag	C	Ampicillin	Homo sapiens	High	Match	Match		hORFeome v3.1
471	5H3	FYN	TK:Src:SrcA	2534	pXN-HA-Flag	N	Ampicillin	Homo sapiens	Median	Match	Match		Ultimate™ ORF Clone LITE Collection
472	5H4	SRC	TK:Src:SrcA	6714	pLX304/CMV/Flag	C	Ampicillin	Homo sapiens	High	Match	Match		hORFeome v3.1
473	5H5	YES1	TK:Src:SrcA	7525	pXN-HA-Flag	N	Ampicillin	Homo sapiens	High	Match	Match		Ultimate™ ORF Clone LITE Collection
474	5H6	BLK	TK:Src:SrcB	640	pLX304/CMV/Flag	C	Ampicillin	Homo sapiens	High	Match	Match		hORFeome v3.1
475	5H7	HCK	TK:Src:SrcB	3055	pXN-HA-Flag	N	Ampicillin	Homo sapiens	High	Match	Match		Ultimate™ ORF Clone LITE Collection
476	5H8	LCK	TK:Src:SrcB	3932	pXN-HA-Flag	N	Ampicillin	Homo sapiens		V49I	Match		Ultimate™ ORF Clone LITE Collection
477	5H9	LYN	TK:Src:SrcB	4067	pLX304/CMV/Flag	C	Ampicillin	Homo sapiens	High	Match	Match	transcript variant 1	hORFeome v3.1
478	5H10	PTK6	TK:Src:SRM	5753	pLX304/CMV/Flag	C	Ampicillin	Homo sapiens	High	Match	Match	transcript variant 1	hORFeome v3.1
479	5H11	SRMS	TK:Src:SRM	6725	pXN-HA-Flag	N	Ampicillin	Homo sapiens	High	Match	Match		Ultimate™ ORF Clone LITE Collection
480	5H12	SYK	TK:Syk:	6850	pLX304/CMV/Flag	C	Ampicillin	Homo sapiens	High	Match	Match		hORFeome v3.1
481	6A1	ZAP70	TK:Syk:	7535	pLX304/CMV/Flag	C	Ampicillin	Homo sapiens	High	Match	Match	transcript variant 1	hORFeome v3.1
482	6A2	BMX	TK:Tec:	660	pLX304/CMV/Flag	C	Ampicillin	Homo sapiens	High	Match	Match	transcript variant 2	hORFeome v3.1
483	6A3	BTK	TK:Tec:	695	pLX304/CMV/Flag	C	Ampicillin	Homo sapiens	High	Match	Match		hORFeome v3.1
484	6A4	ITK	TK:Tec:	3702	pXN-HA-Flag	N	Ampicillin	Homo sapiens	Low	Match	Match		Ultimate™ ORF Clone LITE Collection
485	6A5	TEC	TK:Tec:	7006	pXN-HA-Flag	N	Ampicillin	Homo sapiens	Median	Match	Match		Ultimate™ ORF Clone LITE Collection
486	6A6	TXK	TK:Tec:	7294	pXN-HA-Flag	N	Ampicillin	Homo sapiens	None	Match	Match		Ultimate™ ORF Clone LITE Collection
487	6A7	TEK	TK:Tie:	7010	pXN-HA-Flag	N	Ampicillin	Homo sapiens	None	Match	Match		Ultimate™ ORF Clone LITE Collection
489	6A9	STYK1	TK:TK-Unique:	55359	pLX304/CMV/Flag	C	Ampicillin	Homo sapiens	Median	Match	T264A, M421P, L422T		hORFeome v3.1
490	6A10	NTRK1	TK:Trk:	4914	pLX304/CMV/Flag	C	Ampicillin	Homo sapiens	High	Match	Match		hORFeome v3.1
491	6A11	NTRK2	TK:Trk:	4915	pEGFP-N1-TrkB	C	Kanamycin	Rattus norvegicus		Match	Match		Others
492	6A12	NTRK3	TK:Trk:	4916	pLX304/CMV/Flag	C	Ampicillin	Homo sapiens	Median	Match	L653P		hORFeome v3.1
494	6B2	FLT4	TK:VEGFR:	2324	pLX304/CMV/Flag	C	Ampicillin	Homo sapiens	High	Match	Match	transcript variant 2	hORFeome v3.1
495	6B3	KDR	TK:VEGFR:	3791	pcDNA-C-3Xflag	C	Ampicillin	Homo sapiens		Match	Match		Others
496	6B4	IRAK1	TKL:IRAK:	3654	pXN-HA-Flag	N	Ampicillin	Homo sapiens	Median	S196F	S453L	transcript variant 3	Ultimate™ ORF Clone LITE Collection
497	6B5	IRAK2	TKL:IRAK:	3656	pLX304/CMV/Flag	C	Ampicillin	Homo sapiens	High	Match	Match		hORFeome v3.1
498	6B6	IRAK3	TKL:IRAK:	11213	pLX304/CMV/Flag	C	Ampicillin	Homo sapiens	Median	I147V	Match		hORFeome v3.1
499	6B7	IRAK4	TKL:IRAK:	51135	pLX304/CMV/FLAG	C	Ampicillin	Homo sapiens	Low	Match	Match		hORFeome v3.1
500	6B8	LIMK1	TKL:LISK:LIMK	3984	pLX304/CMV/Flag	C	Ampicillin	Homo sapiens	High	Match	Match		hORFeome v3.1
501	6B9	LIMK2	TKL:LISK:LIMK	3985	pLX304/CMV/Flag	C	Ampicillin	Homo sapiens	Median	Match	Match		hORFeome v3.1
502	6B10	TESK1	TKL:LISK:TESK	7016	pcDNA-C-Flag	C	Ampicillin	Homo sapiens		Match	Match		Others
503	6B11	TESK2	TKL:LISK:TESK	10420	pXN-HA-Flag	N	Ampicillin	Homo sapiens		H147Y	Match		Ultimate™ ORF Clone LITE Collection
504	6B12	LRRK1	TKL:LRRK:	79705	pXN-HA-Flag	N	Ampicillin	Homo sapiens		Match	Match		Ultimate™ ORF Clone LITE Collection
506	6C2	TNNI3K	TKL:MLK:HH498	51086	pXC-Flag	C	Ampicillin	Homo sapiens		T18 missing, may start from a later ATG, not sure	Match	theretical protein size 92KD, see 75-80KD on gel, might be smaller than WT, likely expression start from an alternative ATG a little downstrea, so the protein is a N-term truncation form.	hORFeome v3.1
507	6C3	ILK	TKL:MLK:ILK	3611	pLX304/CMV/Flag	C	Ampicillin	Homo sapiens	Median	Match	Match		hORFeome v3.1
508	6C4	MAP3K12	TKL:MLK:LZK	7786	pXN-HA-Flag	N	Ampicillin	Homo sapiens	Median	Match	Match		Ultimate™ ORF Clone LITE Collection
509	6C5	MAP3K13	TKL:MLK:LZK	9175	pXN-HA-Flag	N	Ampicillin	Homo sapiens	Median	Match	Match		Ultimate™ ORF Clone LITE Collection
511	6C7	MAP3K10	TKL:MLK:MLK	4294	pXN-HA-Flag	N	Ampicillin	Homo sapiens	High	Match	Match		Ultimate™ ORF Clone LITE Collection
512	6C8	MAP3K11	TKL:MLK:MLK	4296	pXN-HA-Flag	N	Ampicillin	Homo sapiens	High	Match	Match		Ultimate™ ORF Clone LITE Collection
513	6C9	MAP3K9	TKL:MLK:MLK	4293	pXN-Myc-His	N	Ampicillin	Homo sapiens		In frame delection between A42 and V43	Match		Others
514	6C10	MAP3K7	TKL:MLK:TAK1	6885	pXC-Flag	C	Ampicillin	Homo sapiens		Match	Match		hORFeome v3.1
515	6C11	MAP3K20	TKL:MLK:ZAK	51776	pLX304/CMV/Flag	C	Ampicillin	Homo sapiens	Median	Match	Match	transcript variant 2	hORFeome v3.1
516	6C12	KSR1	TKL:RAF:KSR	8844	pXN-HA-Flag	N	Ampicillin	Homo sapiens	Median	Match	Match		Ultimate™ ORF Clone LITE Collection
517	6D1	KSR2	TKL:RAF:KSR	283455	pcDNA3-C-Flag	C	Ampicillin	Mus musculus		Match	Match		Others
518	6D2	ARAF	TKL:RAF:RAF	369	pXN-HA-Flag	N	Ampicillin	Homo sapiens		Match	Match		Ultimate™ ORF Clone LITE Collection
519	6D3	BRAF	TKL:RAF:RAF	673	pXN-HA-Flag	N	Ampicillin	Homo sapiens	High	Match	Match		Ultimate™ ORF Clone LITE Collection
520	6D4	RAF1	TKL:RAF:RAF	5894	pXN-HA-Flag	N	Ampicillin	Homo sapiens	Low	Match	Match		Ultimate™ ORF Clone LITE Collection
521	6D5	ANKK1	TKL:RIPK:	255239	pXN-HA-Flag	N	Ampicillin	Homo sapiens	Median	Match	Match		Ultimate™ ORF Clone LITE Collection
522	6D6	RIPK1	TKL:RIPK:	8737	pLX304/CMV/Flag	C	Ampicillin	Homo sapiens	None	Match	Match		hORFeome v3.1
523	6D7	RIPK2	TKL:RIPK:	8767	pLX304/CMV/Flag	C	Ampicillin	Homo sapiens	Low	Match	Match		hORFeome v3.1
524	6D8	RIPK3	TKL:RIPK:	11035	pXN-HA-Flag	N	Ampicillin	Homo sapiens		Match	Match		Ultimate™ ORF Clone LITE Collection
525	6D9	RIPK4	TKL:RIPK:	54101	pXN-HA-Flag	N	Ampicillin	Homo sapiens	Low	Match	Match		Ultimate™ ORF Clone LITE Collection
527	6D11	ACVR1B	TKL:STKR:STKR1	91	pXN-HA-Flag	N	Ampicillin	Homo sapiens	Low	Match	Match		Ultimate™ ORF Clone LITE Collection
528	6D12	ACVR1C	TKL:STKR:STKR1	130399	pXN-HA-Flag	N	Ampicillin	Homo sapiens		Match	L289Q, E332K		Ultimate™ ORF Clone LITE Collection
529	6E1	ACVRL1	TKL:STKR:STKR1	94	pXN-HA-Flag	N	Ampicillin	Homo sapiens		Match	Match		Ultimate™ ORF Clone LITE Collection
530	6E2	BMPR1A	TKL:STKR:STKR1	657	pXC-Flag	C	Ampicillin	Homo sapiens		Match	Match		hORFeome v3.1
531	6E3	BMPR1B	TKL:STKR:STKR1	658	pXN-HA-Flag	N	Ampicillin	Homo sapiens	Low	Match	Match		Ultimate™ ORF Clone LITE Collection
532	6E4	TGFBR1	TKL:STKR:STKR1	7046	pCMV-C-HA	C	Ampicillin	Homo sapiens		T204D	Match		Others
533	6E5	ACVR2A	TKL:STKR:STKR2	92	pXN-HA-Flag	N	Ampicillin	Homo sapiens		Match	Match		Ultimate™ ORF Clone LITE Collection
534	6E6	ACVR2B	TKL:STKR:STKR2	93	pXN-HA-Flag	N	Ampicillin	Homo sapiens		Match	Match		Ultimate™ ORF Clone LITE Collection
535	6E7	AMHR2	TKL:STKR:STKR2	269	pXC-Flag	C	Ampicillin	Homo sapiens		Match	Match		hORFeome v3.1
536	6E8	BMPR2	TKL:STKR:STKR2	659	LNCX BMP-RII-C-Flag	C	Ampicillin	Homo sapiens		Match	truncated from530aa	a truncated form, lose the C-term after 530aa, the kinase domain is at 203-504. full length is 1039aa.	Others
537	6E9	TGFBR2	TKL:STKR:STKR2	7048	pXN-HA-Flag	N	Ampicillin	Homo sapiens		Match	Match		Ultimate™ ORF Clone LITE Collection
538	6E10	MLKL	TKL:TKL-Unique:	197259	pXN-HA-Flag	N	Ampicillin	Homo sapiens	Median	Match	Match		Ultimate™ ORF Clone LITE Collection

## Sheet: Additional expression plasmids
Related position	Official Symbol	Classification	Gene ID	Vector	Tag position	Bacterial resistence	Species	5' seq	3' seq	Source
1A4	CIT	AGC:DMPK:CRIK	11113	pcDNA-C-Myc	C	Ampicillin	Homo sapiens	Match	Match	Ultimate™ ORF Clone LITE Collection
1A6	CDC42BPB	AGC:DMPK:GEK	9578	pcDNA-C-Myc	C	Ampicillin	Homo sapiens	Match	Match	Ultimate™ ORF Clone LITE Collection
1C2	STK38L	AGC:NDR:NDR	23012	pcDNA-C-Myc	C	Ampicillin	Homo sapiens	Match	Match	Ultimate™ ORF Clone LITE Collection
1D10	PKN3	AGC:PKN:	29941	pcDNA-C-Myc	C	Ampicillin	Homo sapiens	A180G	Match	Ultimate™ ORF Clone LITE Collection
1E12	SGK3	AGC:SGK:	23678	pLVX-C-Flag	C	Ampicillin	Homo sapiens	Match	Match	Ultimate™ ORF Clone LITE Collection
1F4	ADCK3	Atypical:ABC1:ABC1-A	56997	pcDNA-C-Myc	C	Ampicillin	Homo sapiens	Match	Match	Ultimate™ ORF Clone LITE Collection
1H1	FASTK	Atypical:FAST:	10922	pcDNA-N-HA	N	Ampicillin	Homo sapiens	Match	V435L	hORFeome v3.1
1H6	PDK2	Atypical:PDHK:PDHK	5164	pcDNA-C-Myc	C	Ampicillin	Homo sapiens	Match	Match	Ultimate™ ORF Clone LITE Collection
2F6	PRKD1	CAMK:PKD:	5587	pcDNA-C-Myc	C	Ampicillin	Homo sapiens	Match	Match	Ultimate™ ORF Clone LITE Collection
2G4	TRIB3	CAMK:Trbl:	57761	pEGFP-C1	N	Kanamycin	Homo sapiens	Match	Match	Ultimate™ ORF Clone LITE Collection
3D4	HIPK2	CMGC:DYRK:HIPK	15258	pEGFP-C1	N	Kanamycin	Mus musculus	Match	Match	Ultimate™ ORF Clone LITE Collection
3E8	MAPK11	CMGC:MAPK:p38	5600	pcDNA-C-Myc	C	Ampicillin	Homo sapiens	Match	Match	Ultimate™ ORF Clone LITE Collection
3F2	MOK	CMGC:RCK:MOK	5891	pcDNA-C-Myc	C	Ampicillin	Homo sapiens	Match	Match	Ultimate™ ORF Clone LITE Collection
3F8	NME3	NDK:NDK:	4832	pcDNA-C-Myc	C	Ampicillin	Homo sapiens	Match	Match	Ultimate™ ORF Clone LITE Collection
3F9	NME4	NDK:NDK:	4833	pcDNA-C-Myc	C	Ampicillin	Homo sapiens	Match	Match	Ultimate™ ORF Clone LITE Collection
3F12	NME7	NDK:NDK:	29922	pXC-Flag	C	Ampicillin	Homo sapiens	E5K	Match	hORFeome v3.1
3H11	BMP2K	Other:NAK:BIKE	55589	pLVX-sfGFP	N	Ampicillin	Homo sapiens	Match	Match	Ultimate™ ORF Clone LITE Collection
4A12	NEK9	Other:NEK:NEK9	91754	pcDNA-C-Myc	C	Ampicillin	Homo sapiens	Match	Match	Ultimate™ ORF Clone LITE Collection
4C9	PLK2	Other:PLK:PLK2	10769	pXC-Flag	C	Ampicillin	Homo sapiens	Match	Match	Others
4C10	PLK3	Other:PLK:PLK2	1263	pcDNA-C-Myc	C	Ampicillin	Homo sapiens	2-6aa missing	Match	Others
4E3	ULK4	Other:ULK:ULK	54986	pcDNA-C-Myc	C	Ampicillin	Homo sapiens	Match	Match	Ultimate™ ORF Clone LITE Collection
4E11	WNK4	Other:WNK:	65266	pcDNA-C-Myc	C	Ampicillin	Homo sapiens	Match	Match	Others
4F1	FAM198B	PKL:FJ:	51313	pcDNA-C-Myc	C	Ampicillin	Homo sapiens	Match	G440S	Ultimate™ ORF Clone LITE Collection
4F2	FAM20A	PKL:FJ:	54757	pcDNA-C-Myc	C	Ampicillin	Homo sapiens	Match	N332K, L530S	Ultimate™ ORF Clone LITE Collection
4F8	GUCY2F	RGC:RGC:	2986	pcDNA-C-Myc	C	Ampicillin	Homo sapiens	Match	Match	Ultimate™ ORF Clone LITE Collection
4G9	MAP4K1	STE:STE20:KHS	11184	pcDNA-C-Myc	C	Ampicillin	Homo sapiens	Match	Match	Ultimate™ ORF Clone LITE Collection
4G10	MAP4K2	STE:STE20:KHS	5871	pcDNA-C-Myc	C	Ampicillin	Homo sapiens	Match	Match	Ultimate™ ORF Clone LITE Collection
4G11	MAP4K3	STE:STE20:KHS	8491	pcDNA-C-Myc (full length)	C	Ampicillin	Homo sapiens	missing most N-term 12 AA	Match	Others
4H2	MINK1	STE:STE20:MSN	50488	pcDNA-C-Myc	C	Ampicillin	Homo sapiens	Match	Match	Ultimate™ ORF Clone LITE Collection
5A2	PAK5	STE:STE20:PAKB	57144	pcDNA-N-HA	N	Ampicillin	Homo sapiens	P21A	Match	hORFeome v3.1
5A9	TAOK3	STE:STE20:TAO	51347	pcDNA-C-Myc	C	Ampicillin	Homo sapiens	Match	Match	Others
5B12	TNK1	TK:Ack:	8711	pcDNA-C-Myc	C	Ampicillin	Homo sapiens	Match	Match	Others
5C7	PTK7	TK:CCK4:	5754	pcDNA-C-Myc	C	Ampicillin	Homo sapiens	Match	Match	Ultimate™ ORF Clone LITE Collection
5D5	EPHA10	TK:Eph:	284656	pcDNA-C-Myc	C	Ampicillin	Homo sapiens	Match	Match	Ultimate™ ORF Clone LITE Collection
5D10	EPHA6	TK:Eph:	13840	pcDNA-C-Myc	C	Ampicillin	Mus musculus	Match	Match	Ultimate™ ORF Clone LITE Collection
5F2	IGF1R	TK:InsR:	3480	pcDNA-C-Myc	C	Ampicillin	Homo sapiens	Match	Match	Ultimate™ ORF Clone LITE Collection
6A7	TEK	TK:Tie:	7010	pcDNA-C-Myc	C	Ampicillin	Homo sapiens	Match	Match	Ultimate™ ORF Clone LITE Collection
6B4	IRAK1	TKL:IRAK:	3654	pcDNA-C-Myc	C	Ampicillin	Homo sapiens	S196F	S453L	Ultimate™ ORF Clone LITE Collection
6B12	LRRK1	TKL:LRRK:	79705	pcDNA-C-Myc	C	Ampicillin	Homo sapiens	Match	Match	Ultimate™ ORF Clone LITE Collection
6C4	MAP3K12	TKL:MLK:LZK	7786	pcDNA-C-Myc	C	Ampicillin	Homo sapiens	Match	Match	Ultimate™ ORF Clone LITE Collection
6C5	MAP3K13	TKL:MLK:LZK	9175	pcDNA-C-Myc	C	Ampicillin	Homo sapiens	Match	Match	Ultimate™ ORF Clone LITE Collection
6C8	MAP3K11	TKL:MLK:MLK	4296	pcDNA-C-Myc	C	Ampicillin	Homo sapiens	Match	Match	Ultimate™ ORF Clone LITE Collection
6D11	ACVR1B	TKL:STKR:STKR1	91	pcDNA-C-Myc	C	Ampicillin	Homo sapiens	Match	Match	Ultimate™ ORF Clone LITE Collection
6D12	ACVR1C	TKL:STKR:STKR1	130399	pcDNA-C-Myc	C	Ampicillin	Homo sapiens	Match	L289Q, E332K	Ultimate™ ORF Clone LITE Collection
6E1	ACVRL1	TKL:STKR:STKR1	94	pcDNA-C-Myc	C	Ampicillin	Homo sapiens	Match	Match	Ultimate™ ORF Clone LITE Collection
