# Supplementary material for: A subcellular map of the human kinome
Source: eLife. 2021 May 14;10:e64943. doi: 10.7554/eLife.64943 (PMC8175086; doi:10.7554/eLife.64943)
Supplement: Supplementary file 2. [file elife-64943-supp2.xlsx]

## Sheet: Kinome Atlas
#	Position	Official Symbol	Classification	Gene ID	Vector	Tag position	Localization Score
							N	C	CS	PM	MI	GL	ER	V	CT	AG
1	1A1	AKT1	AGC:Akt:	207	pLX304/CMV/Flag	C	1	4		5
2	1A2	AKT2	AGC:Akt:	208	pXN-HA-Flag	N	1	4		5
3	1A3	AKT3	AGC:Akt:	10000	pXN-HA-Flag	N	1	4		5
4	1A4	CIT	AGC:DMPK:CRIK	11113	pXN-HA-Flag	N		3						7
5	1A5	CDC42BPA	AGC:DMPK:GEK	8476	pcDNA-C-Myc	C				10
6	1A6	CDC42BPB	AGC:DMPK:GEK	9578	pXN-HA-Flag	N		5						5
7	1A7	CDC42BPG	AGC:DMPK:GEK	55561	pXN-HA-Flag	N		5						5
8	1A8	DMPK	AGC:DMPK:GEK	1760	pXN-HA-Flag	N	1	5			1			3
9	1A9	ROCK1	AGC:DMPK:ROCK	6093	pCAG-Myc	N		2		8
11	1A11	GRK2	AGC:GRK:BARK	156	pLX304/CMV/Flag	C		8		2
12	1A12	GRK3	AGC:GRK:BARK	157	pXN-HA-Flag	N		8		2
13	1B1	GRK1	AGC:GRK:GRK	6011	pXN-HA-Flag	N		4		6
14	1B2	GRK4	AGC:GRK:GRK	2868	pXN-HA-Flag	N		5		4				1
16	1B4	GRK6	AGC:GRK:GRK	2870	pcDNA-C-Myc	C	4			5	1
17	1B5	GRK7	AGC:GRK:GRK	131890	pLX304/CMV/Flag	C		10
18	1B6	MAST1	AGC:MAST:MAST	56527	pXN-HA-Flag	N		9		1
19	1B7	MAST2	AGC:MAST:MAST	23139	pcDNA-C-Flag	C		7		3
21	1B9	MAST4	AGC:MAST:MAST	375449	pXN-HA-Flag	N		6		4
22	1B10	MASTL	AGC:MAST:MASTL	84930	pXN-HA-Flag	N	10
23	1B11	LATS1	AGC:NDR:LATS	9113	pcDNA3-HA-Lats1	N	2	5		2				1
24	1B12	LATS2	AGC:NDR:LATS	26524	pcDNA3-HA-Lats2	N	1	4						5
25	1C1	STK38	AGC:NDR:NDR	11329	pLX304/CMV/Flag	C	4	6
26	1C2	STK38L	AGC:NDR:NDR	23012	pXN-HA-Flag	N		5						5
27	1C3	PDPK1	AGC:PDK1:	5170	pLX304/CMV/Flag	C		6		4
28	1C4	PRKACA	AGC:PKA:	5566	pLX304/CMV/Flag	C		5				5
29	1C5	PRKACB	AGC:PKA:	5567	pLX304/CMV/Flag	C		10
30	1C6	PRKACG	AGC:PKA:	5568	pXN-HA-Flag	N		10
31	1C7	PRKX	AGC:PKA:	5613	pXN-HA-Flag	N	2	8
33	1C9	PRKCA	AGC:PKC:PKCa	5578	pLX304/CMV/Flag	C		7		3
34	1C10	PRKCB	AGC:PKC:PKCa	5579	pLX304/CMV/Flag	C		6		3				1
35	1C11	PRKCG	AGC:PKC:PKCa	5582	pHACE-PKCγ-HA	C	1	2		7
36	1C12	PRKCD	AGC:PKC:PKCd	5580	pXN-HA-Flag	N		7		3
37	1D1	PRKCQ	AGC:PKC:PKCd	5588	pXN-HA-Flag	N		5		5
38	1D2	PRKCE	AGC:PKC:PKCh	5581	pLX304/CMV/Flag	C		4					3	3
39	1D3	PRKCH	AGC:PKC:PKCh	5583	pLX304/CMV/Flag	C		3					5	2
40	1D4	PRKCI	AGC:PKC:PKCi	5584	pXN-HA-Flag	N	2	3		5
41	1D5	PRKCZ	AGC:PKC:PKCi	5590	pLX304/CMV/Flag	C		5		5
42	1D6	PRKG1	AGC:PKG:	5592	pXN-HA-Flag	N		6		4
43	1D7	PRKG2	AGC:PKG:	5593	pLX304/CMV/Flag	C		3	1	3				3
44	1D8	PKN1	AGC:PKN:	5585	pXN-HA-Flag	N		10
45	1D9	PKN2	AGC:PKN:	5586	pXN-HA-Flag	N	2	6		2
46	1D10	PKN3	AGC:PKN:	29941	pXN-HA-Flag	N		10
47	1D11	RPS6KA4	AGC:RSK:MSK CAMK:RSKb:MSKb	8986	pRK7-HA-MSK2	N	6	2		2
48	1D12	RPS6KA5	AGC:RSK:MSK CAMK:RSKb:MSKb	9252	pLX304/CMV/Flag	C	1	7		2
49	1E1	RPS6KB1	AGC:RSK:RSKp70	6198	pXN-HA-Flag	N	4	4		2
50	1E2	RPS6KB2	AGC:RSK:RSKp70	6199	pXC-Flag	C	4	4		2
51	1E3	RPS6KA1	AGC:RSK:RSKp90 CAMK:RSKb:RSKb	6195	pXN-HA-Flag	N	3	4		3
52	1E4	RPS6KA2	AGC:RSK:RSKp90 CAMK:RSKb:RSKb	6196	pcDNA-C-Flag	C		3		7
53	1E5	RPS6KA3	AGC:RSK:RSKp90 CAMK:RSKb:RSKb	6197	pLX304/CMV/Flag	C	4	5		1
54	1E6	RPS6KA6	AGC:RSK:RSKp90 CAMK:RSKb:RSKb	27330	pLX304/CMV/Flag	C	2	2		1	5
56	1E8	RPS6KL1	AGC:RSKL:	83694	pcDNA-C-Flag	C	1	9
58	1E10	SGK1	AGC:SGK:	6446	N-HA-S422D	N	1	7		2
59	1E11	SGK2	AGC:SGK:	10110	pLX304/CMV/Flag	C	2	7		1
60	1E12	SGK3	AGC:SGK:	23678	pXN-HA-Flag	N		2				5		3
61	1F1	STK32A	AGC:YANK:	202374	pLX304/CMV/Flag	C		4						3		3
62	1F2	STK32B	AGC:YANK:	55351	pXN-HA-Flag	N	1	6		3
63	1F3	STK32C	AGC:YANK:	57740	pXN-HA-Flag	N	2	5		3
64	1F4	ADCK3	Atypical:ABC1:ABC1-A	56997	pXN-HA-Flag	N		9						1
65	1F5	ADCK4	Atypical:ABC1:ABC1-A	79934	pcDNA-C-Flag	C					10
66	1F6	ADCK1	Atypical:ABC1:ABC1-B	57143	pXN-HA-Flag	N		2			5			3
67	1F7	ADCK2	Atypical:ABC1:ABC1-C	90956	pXC-Flag	C		5			5
70	1F10	ALPK2	Atypical:Alpha:Alpha-Unclassified	115701	pXN-HA-Flag	N	1	7		2
74	1G2	EEF2K	Atypical:Alpha:eEF2K	29904	pLX304/CMV/Flag	C		9		1
77	1G5	ABR	Atypical:BCR:	29	pXN-HA-Flag	N		2		6						2
78	1G6	BCR	Atypical:BCR:	613	pXN-HA-Flag	N		10
79	1G7	BLVRA	Atypical:BLVRA:	644	pXN-HA-Flag	N	3	3		4
80	1G8	BRD2	Atypical:BRD:	6046	pXN-HA-Flag	N	10
81	1G9	BRD3	Atypical:BRD:	8019	pXN-HA-Flag	N	10
82	1G10	BRD4	Atypical:BRD:	23476	pCMV-Flag-BRD4	N	10
83	1G11	BRDT	Atypical:BRD:	676	pXN-HA-Flag	N	10
84	1G12	CERT1	Atypical:Col4A3BP:	10087	pLX304/CMV/Flag	C		7		3
85	1H1	FASTK	Atypical:FAST:	10922	pLX304/CMV/Flag	C	6	3								1
86	1H2	STK19	Atypical:G11:	8859	pXN-HA-Flag	N	10
87	1H3	GTF2F1	Atypical:GTF2F1:	2962	pXN-HA-Flag	N	10
88	1H4	BCKDK	Atypical:PDHK:BCKDK	10295	pLX304/CMV/Flag	C					10
89	1H5	PDK1	Atypical:PDHK:PDHK	5163	pLX304/CMV/Flag	C					10
90	1H6	PDK2	Atypical:PDHK:PDHK	5164	pXN-HA-Flag	N	1	6		3
91	1H7	PDK3	Atypical:PDHK:PDHK	5165	pLX304/CMV/Flag	C					10
92	1H8	PDK4	Atypical:PDHK:PDHK	5166	pXC-Flag	C					10
94	1H10	ATR	Atypical:PIKK:ATR	545	pXN-HA-Flag	N	6	4
96	1H12	MTOR	Atypical:PIKK:FRAP	2475	pRK5-Myc	N		10
99	2A3	RIOK1	Atypical:RIO:RIO1	83732	pLX304/CMV/Flag	C	8	2
100	2A4	RIOK2	Atypical:RIO:RIO2	55781	pXN-HA-Flag	N	1	6		3
101	2A5	RIOK3	Atypical:RIO:RIO3	8780	pLX304/CMV/Flag	C	1	7		2
102	2A6	TAF1	Atypical:TAF1:	6872	pXN-HA-Flag	N		8		2
103	2A7	TAF1L	Atypical:TAF1:	138474	pCMV-Tag2A-HA-TAF1L	N
104	2A8	TRIM24	Atypical:TIF1:	8805	pXN-HA-Flag	N	9	1
108	2A12	CAMK1	CAMK:CAMK1:	8536	pLX304/CMV/Flag	C		6		4
109	2B1	CAMK1D	CAMK:CAMK1:	57118	pLX304/CMV/Flag	C		6		4
110	2B2	CAMK1G	CAMK:CAMK1:	57172	pcDNA-C-Flag	C		4		6
111	2B3	CAMK4	CAMK:CAMK1:	814	pXN-HA-Flag	N	2	4		4
112	2B4	PNCK	CAMK:CAMK1:	93843	pXN-HA-Flag	N	3	4		3
113	2B5	CAMK2A	CAMK:CAMK2:	815	pLX304/CMV/Flag	C		8		2
114	2B6	CAMK2B	CAMK:CAMK2:	816	pLX304/CMV/Flag	C		8		2
115	2B7	CAMK2D	CAMK:CAMK2:	817	pLX304/CMV/Flag	C		8		2
116	2B8	CAMK2G	CAMK:CAMK2:	818	pXN-HA-Flag	N	7	3
117	2B9	PRKAA1	CAMK:CAMKL:AMPK	5562	pcDNA3-HA	N	5	5
118	2B10	PRKAA2	CAMK:CAMKL:AMPK	5563	pLX304/CMV/Flag	C	5	5
119	2B11	BRSK1	CAMK:CAMKL:BRSK	84446	pEBG2T-GST-HA	N		1		9
120	2B12	BRSK2	CAMK:CAMKL:BRSK	9024	pLX304/CMV/Flag	C		3		7
121	2C1	CHEK1	CAMK:CAMKL:CHK1	1111	pXN-HA-Flag	N	6	4
123	2C3	STK11	CAMK:CAMKL:LKB	6794	pLX304/CMV/Flag	C	8	2
124	2C4	MARK1	CAMK:CAMKL:MARK	4139	pXN-HA-Flag	N		4	3	3
125	2C5	MARK2	CAMK:CAMKL:MARK	2011	pXN-HA-Flag	N		2	2	6
126	2C6	MARK3	CAMK:CAMKL:MARK	4140	MARK3-HA	C		2		8
127	2C7	MARK4	CAMK:CAMKL:MARK	57787	pRK7-N-Flag-WT	N		10
128	2C8	MELK	CAMK:CAMKL:MELK	9833	pEBG2T-GST-HA	N		7		3
129	2C9	NIM1K	CAMK:CAMKL:NIM1	167359	pXN-HA-Flag	N		3		7
131	2C11	NUAK2	CAMK:CAMKL:NuaK	81788	pXN-HA-Flag	N	10
132	2C12	PASK	CAMK:CAMKL:PASK	23178	Myc-PASK	N		6		4
133	2D1	SIK1	CAMK:CAMKL:QIK	150094	pLX304/CMV/Flag	C	10
135	2D3	SIK3	CAMK:CAMKL:QIK	23387	pXN-HA-Flag	N		9		1
136	2D4	SNRK	CAMK:CAMKL:SNRK	54861	pXN-HA-Flag	N	1	6		3
137	2D5	CAMKV	CAMK:CAMK-Unique:	79012	pLX304/CMV/Flag	C		2	3	5
138	2D6	CASK	CAMK:CASK:	8573	pLX304/CMV/Flag	C	1	5		4
139	2D7	DAPK1	CAMK:DAPK:DAPK	1612	pLX304/CMV/Flag	C		7	2	1
140	2D8	DAPK2	CAMK:DAPK:DAPK	23604	pLX304/CMV/Flag	C		6		4
141	2D9	DAPK3	CAMK:DAPK:DAPK	1613	pXN-HA-Flag	N	1	4		3				2
142	2D10	STK17A	CAMK:DAPK:DRAK	9263	pXN-HA-Flag	N	7	3
143	2D11	STK17B	CAMK:DAPK:DRAK	9262	pXN-HA-Flag	N	6	4
145	2E1	DCLK2	CAMK:DCAMKL:	166614	pXC-Flag	C		2	8
146	2E2	DCLK3	CAMK:DCAMKL:	85443	pXN-HA-Flag	N		7		3
147	2E3	MAPKAPK2	CAMK:MAPKAPK:MK2	9261	pXN-HA-Flag	N	4	5		1
148	2E4	MAPKAPK3	CAMK:MAPKAPK:MK2	7867	pLX304/CMV/Flag	C	5	4		1
149	2E5	MAPKAPK5	CAMK:MAPKAPK:MK5	8550	pXN-HA-Flag	N	5	4		1
150	2E6	MKNK1	CAMK:MAPKAPK:MNK	8569	pLX304/CMV/Flag	C		8		2
151	2E7	MKNK2	CAMK:MAPKAPK:MNK	2872	pXN-HA-Flag	N	2	5		3
154	2E10	MYLK3	CAMK:MLCK:	91807	pLX304/CMV/Flag	C		8		2
157	2F1	PHKG1	CAMK:PHK:	5260	pXN-HA-Flag	N		6		4
158	2F2	PHKG2	CAMK:PHK:	5261	pcDNA-C-Flag	C	1	6		3
159	2F3	PIM1	CAMK:PIM:	5292	pXN-HA-Flag	N	7	3
160	2F4	PIM2	CAMK:PIM:	11040	pLX304/CMV/Flag	C	7	3
161	2F5	PIM3	CAMK:PIM:	415116	pcDNA-C-Flag	C	3	5		2
162	2F6	PRKD1	CAMK:PKD:	5587	pXN-HA-Flag	N		5		2		3
163	2F7	PRKD2	CAMK:PKD:	25865	pLX304/CMV/Flag	C		5		1		2		2
164	2F8	PRKD3	CAMK:PKD:	23683	pXN-HA-Flag	N		3		2		3		2
165	2F9	PSKH1	CAMK:PSK:	5681	pcDNA-C-Flag	C	5	3				2
166	2F10	PSKH2	CAMK:PSK:	85481	pXN-HA-Flag	N		9		1
167	2F11	CHEK2	CAMK:RAD53:	11200	pXN-HA-Flag	N	10
168	2F12	STK40	CAMK:SgK495:	83931	pLX304/CMV/Flag	C	6	4
169	2G1	STK33	CAMK:STK33:	65975	pLX304/CMV/Flag	C	3	4		3
170	2G2	TRIB1	CAMK:Trbl:	10221	pXN-HA-Flag	N	10
171	2G3	TRIB2	CAMK:Trbl:	28951	pLX304/CMV/Flag	C	5	5
172	2G4	TRIB3	CAMK:Trbl:	57761	pXN-HA-Flag	N	10
173	2G5	KALRN	CAMK:Trio:	8997	pXN-HA-Flag	N		5		3				2
176	2G8	SPEG	CAMK:Trio: CAMK:Trio:	10290	pXN-HA-Flag	N		8		2
177	2G9	TSSK1B	CAMK:TSSK:	83942	pXN-HA-Flag	N		8		2
178	2G10	TSSK2	CAMK:TSSK:	23617	pXN-HA-Flag	N	2	8
179	2G11	TSSK3	CAMK:TSSK:	81629	pXC-Flag	C	1	1								8
181	2H1	TSSK6	CAMK:TSSK:	83983	pXN-HA-Flag	N	3	7
182	2H2	CSNK1A1	CK1:CK1:CK1-A	1452	pXN-HA-Flag	N	1	9
183	2H3	CSNK1A1L	CK1:CK1:CK1-A	122011	pXN-HA-Flag	N	1	9
184	2H4	CSNK1D	CK1:CK1:CK1-D	1453	pcDNA-C-Flag	C		9		1
185	2H5	CSNK1E	CK1:CK1:CK1-D	1454	pLX304/CMV/Flag	C	1	9
186	2H6	CSNK1G1	CK1:CK1:CK1-G	53944	CSNK1G1-Myc	C		2		6		2
188	2H8	CSNK1G3	CK1:CK1:CK1-G	1456	pcDNA-C-Myc	C		1		7				2
189	2H9	TTBK1	CK1:TTBK:	84630	pXN-HA-Flag	N		10
191	2H11	VRK1	CK1:VRK:	7443	pLX304/CMV/Flag	C	10
192	2H12	VRK2	CK1:VRK:	7444	pXN-HA-Flag	N							10
193	3A1	VRK3	CK1:VRK:	51231	pXN-HA-Flag	N	10
194	3A2	CDK20	CMGC:CDK:CCRK	23552	pLX304/CMV/Flag	C	1	6								3
195	3A3	CDK1	CMGC:CDK:CDC2	983	pLX304/CMV/Flag	C	1	9
196	3A4	CDK10	CMGC:CDK:CDK10	8558	pLX304/CMV/Flag	C	10
199	3A7	CDK2	CMGC:CDK:CDK2	1017	pLX304/CMV/Flag	C	1	9
200	3A8	CDK3	CMGC:CDK:CDK2	1018	pLX304/CMV/Flag	C	4	6
201	3A9	CDK4	CMGC:CDK:CDK4	1019	pLX304/CMV/Flag	C	3	7
202	3A10	CDK6	CMGC:CDK:CDK4	1021	pLX304/CMV/Flag	C	1	9
203	3A11	CDK5	CMGC:CDK:CDK5	1020	pLX304/CMV/Flag	C	3	7
204	3A12	CDK7	CMGC:CDK:CDK7	1022	pXN-HA-Flag	N	10
205	3B1	CDK19	CMGC:CDK:CDK8	23097	pcDNA3.1 N-Flag/Hygro	N	10
206	3B2	CDK8	CMGC:CDK:CDK8	1024	pXN-HA-Flag	N	10
207	3B3	CDK9	CMGC:CDK:CDK9	1025	pLX304/CMV/Flag	C	7	3
208	3B4	CDK12	CMGC:CDK:CRK7	51755	pXN-HA-Flag	N	10
209	3B5	CDK13	CMGC:CDK:CRK7	8621	pXN-HA-Flag	N	10
210	3B6	CDK16	CMGC:CDK:PCTAIRE	5127	pLX304/CMV/Flag	C		10
211	3B7	CDK17	CMGC:CDK:PCTAIRE	5128	pLX304/CMV/FLAG	C
212	3B8	CDK18	CMGC:CDK:PCTAIRE	5129	pXN-HA-Flag	N		10
213	3B9	CDK14	CMGC:CDK:PFTAIRE	5218	pXN-HA-Flag	N	1	6		3
214	3B10	CDK15	CMGC:CDK:PFTAIRE	65061	pXN-HA-Flag	N	5	5
215	3B11	CDKL1	CMGC:CDKL:	8814	pcDNA-C-Flag	C	1	9
216	3B12	CDKL2	CMGC:CDKL:	8999	pXN-HA-Flag	N		9		1
217	3C1	CDKL3	CMGC:CDKL:	51265	pXN-HA-Flag	N	10
218	3C2	CDKL4	CMGC:CDKL:	344387	pLX304/CMV/FLAG	C
220	3C4	CSNK2A1	CMGC:CK2:	1457	pLX304/CMV/Flag	C	10
221	3C5	CSNK2A2	CMGC:CK2:	1459	pXN-HA-Flag	N	2	8
222	3C6	CLK1	CMGC:CLK:	1195	pXN-HA-Flag	N	10
223	3C7	CLK2	CMGC:CLK:	1196	pLX304/CMV/Flag	C	10
224	3C8	CLK3	CMGC:CLK:	1198	pLX304/CMV/Flag	C	10
225	3C9	CLK4	CMGC:CLK:	57396	pXN-HA-Flag	N	10
226	3C10	DYRK1A	CMGC:DYRK:DYRK1	1859	HA-DYRK1A	N	10
227	3C11	DYRK1B	CMGC:DYRK:DYRK1	9149	pLX304/CMV/Flag	C	6	4
228	3C12	DYRK2	CMGC:DYRK:DYRK2	8445	HA-DYRK2	N	8	2
229	3D1	DYRK3	CMGC:DYRK:DYRK2	8444	pXN-HA-Flag	N		10
230	3D2	DYRK4	CMGC:DYRK:DYRK2	8798	pXN-HA-Flag	N		10
231	3D3	HIPK1	CMGC:DYRK:HIPK	204851	pXN-HA-Flag	N		10
232	3D4	HIPK2	CMGC:DYRK:HIPK	15258	pXN-HA-Flag	N	8	2
233	3D5	HIPK3	CMGC:DYRK:HIPK	10114	pXN-HA-Flag	N	7	3
234	3D6	HIPK4	CMGC:DYRK:HIPK	147746	pXN-HA-Flag	N		9		1
235	3D7	PRPF4B	CMGC:DYRK:PRP4	8899	pXN-HA-Flag	N	10
236	3D8	GSK3A	CMGC:GSK:	2931	pLX304/CMV/Flag	C		10
237	3D9	GSK3B	CMGC:GSK:	2932	pXN-HA-Flag	N		9		1
238	3D10	MAPK1	CMGC:MAPK:ERK1	5594	pXN-HA-Flag	N	1	6		3
239	3D11	MAPK3	CMGC:MAPK:ERK1	5595	pcDNA-C-Flag	C	2	5		3
240	3D12	MAPK4	CMGC:MAPK:ERK3	5596	pXN-HA-Flag	N		10
241	3E1	MAPK6	CMGC:MAPK:ERK3	5597	pXN-Myc-His	N	5	2	1	2
242	3E2	MAPK7	CMGC:MAPK:ERK5	5598	pXN-HA-Flag	N		7		3
243	3E3	MAPK15	CMGC:MAPK:ERK7	332110	pXN-HA-Flag	N	3	7
244	3E4	MAPK10	CMGC:MAPK:JNK	5602	pXN-HA-Flag	N	3	5		2
245	3E5	MAPK8	CMGC:MAPK:JNK	5599	pLX304/CMV/Flag	C	2	7		1
246	3E6	MAPK9	CMGC:MAPK:JNK	5601	pXN-HA-Flag	N	1	6		3
247	3E7	NLK	CMGC:MAPK:nmo	51701	pCMV-NLK-Flag	C	1	1		5		3
248	3E8	MAPK11	CMGC:MAPK:p38	5600	pXN-HA-Flag	N		1		9
249	3E9	MAPK12	CMGC:MAPK:p38	6300	pLX304/CMV/Flag	C	1	5		4
250	3E10	MAPK13	CMGC:MAPK:p38	5603	pLX304/CMV/Flag	C	1	6		3
251	3E11	MAPK14	CMGC:MAPK:p38	1432	pLX304/CMV/Flag	C	2	8
252	3E12	CILK1	CMGC:RCK:MAK	22858	pXN-HA-Flag	N	5	5
253	3F1	MAK	CMGC:RCK:MAK	4117	pXN-HA-Flag	N	6	4
254	3F2	MOK	CMGC:RCK:MOK	5891	pXN-HA-Flag	N		8			2
255	3F3	SRPK1	CMGC:SRPK:	6732	pLX304/CMV/Flag	C		10
256	3F4	SRPK2	CMGC:SRPK:	6733	pXN-HA-Flag	N		10
257	3F5	SRPK3	CMGC:SRPK:	26576	pLX304/CMV/Flag	C		10
258	3F6	NME1	NDK:NDK:	4830	pLX304/CMV/Flag	C	1	6		3
259	3F7	NME2	NDK:NDK:	4831	pLX304/CMV/Flag	C	1	5		4
260	3F8	NME3	NDK:NDK:	4832	pXN-HA-Flag	N		4			6
261	3F9	NME4	NDK:NDK:	4833	pXN-HA-Flag	N	1	6						3
262	3F10	NME5	NDK:NDK:	8382	pLX304/CMV/Flag	C	5	5
263	3F11	NME6	NDK:NDK:	10201	pLX304/CMV/Flag	C					10
264	3F12	NME7	NDK:NDK:	29922	pLX304/CMV/Flag	C		7		3
266	3G2	NME8	NDK:NDK:	51314	pLX304/CMV/Flag	C	1	9
267	3G3	AURKA	Other:Aur:	6790	pXN-HA-Flag	N	1	7		2
268	3G4	AURKB	Other:Aur:	9212	pLX304/CMV/Flag	C	5	5
269	3G5	AURKC	Other:Aur:	6795	pLX304/CMV/Flag	C	4	6
270	3G6	BUB1	Other:BUB:	699	pXN-HA-Flag	N	1	7		2
271	3G7	BUB1B	Other:BUB:	701	pXN-HA-Flag	N		7		3
272	3G8	TP53RK	Other:Bud32:	112858	pLX304/CMV/Flag	C	10
273	3G9	CAMKK1	Other:CAMKK:CAMKK-Meta	84254	pLX304/CMV/Flag	C	3	7
274	3G10	CAMKK2	Other:CAMKK:CAMKK-Meta	10645	pcDNA3-N-Flag	N	1	5		4
275	3G11	CDC7	Other:CDC7:	8317	pXC-Flag	C	10
276	3G12	DSTYK	Other:Dusty:	25778	pLX304/CMV/Flag	C		9		1
277	3H1	HASPIN	Other:Haspin:	83903	pXN-HA-Flag	N	10
279	3H3	IKBKB	Other:IKK:	3551	pcDNA3-N-HA	N	2	5		3
280	3H4	IKBKE	Other:IKK:	9641	pLX304/CMV/Flag	C		6								4
282	3H6	ERN1	Other:IRE:	2081	pXC-Flag	C		2					8
283	3H7	ERN2	Other:IRE:	10595	pXC-Flag	C		1						6		3
284	3H8	UHMK1	Other:KIS:	127933	pXN-HA-Flag	N	5	4		1
285	3H9	MOS	Other:MOS:	4342	pXN-HA-Flag	N	10
286	3H10	AAK1	Other:NAK:BIKE	22848	HA-AAK1	N
287	3H11	BMP2K	Other:NAK:BIKE	55589	pXN-HA-Flag	N		3						7
288	3H12	GAK	Other:NAK:GAK	2580	pEGFP-EGFP	N		2				8
289	4A1	STK16	Other:NAK:MPSK	8576	pLX304/CMV/Flag	C				3		7
290	4A2	NEK1	Other:NEK:NEK1	4750	pXN-HA-Flag	N		10
291	4A3	NEK3	Other:NEK:NEK1	4752	pXN-HA-Flag	N	1	6		3
292	4A4	NEK5	Other:NEK:NEK1	341676	pXN-HA-Flag	N	7	3
293	4A5	NEK10	Other:NEK:NEK10	152110	pXC-Flag	C	2	8
294	4A6	NEK11	Other:NEK:NEK11	79858	pXN-HA-Flag	N		7		3
296	4A8	NEK4	Other:NEK:NEK4	23955	pXN-HA-Flag	N		9		1
297	4A9	NEK6	Other:NEK:NEK6	10783	pLX304/CMV/Flag	C	5	5
298	4A10	NEK7	Other:NEK:NEK6	140609	pLX304/CMV/Flag	C	5	5
299	4A11	NEK8	Other:NEK:NEK8	284086	pcDNA-C-Flag	C	1	9
300	4A12	NEK9	Other:NEK:NEK9	91754	pXN-HA-Flag	N		6		4
301	4B1	SBK1	Other:NKF1:	388228	pXN-HA-Flag	N		8		2
302	4B2	SBK2	Other:NKF1:	646643	pXN-HA-Flag	N	4	6
304	4B4	PINK1	Other:NKF2:	65018	pXN-HA-Flag	N		2			8
305	4B5	PEAK1	Other:NKF3:	79834	pXN-HA-Flag	N		1	3	2		4
310	4B10	NRBP1	Other:NRBP:	29959	pcDNA-C-Flag	C		7		3
311	4B11	NRBP2	Other:NRBP:	223649	pcDNA-C-Flag	C		9		1
312	4B12	RNASEL	Other:Other-Unique:	6041	pXN-HA-Flag	N		9		1
313	4C1	POMK	Other:Other-Unique:	84197	pLX304/CMV/Flag	C						2	8
314	4C2	STK31	Other:Other-Unique:	56164	pXN-HA-Flag	N		10
315	4C3	PAN3	Other:PAN3:	255967	pT7-EGFP-C1-HsPAN3	N								10
317	4C5	EIF2AK1	Other:PEK:HRI	27102	pXN-HA-Flag	N		10
318	4C6	EIF2AK3	Other:PEK:PEK	9451	pXC-Flag	C		3					7
319	4C7	EIF2AK2	Other:PEK:PKR	5610	pXN-HA-Flag	N		10
320	4C8	PLK1	Other:PLK:PLK1	5347	pXN-HA-Flag	N	2	6							2
321	4C9	PLK2	Other:PLK:PLK2	10769	HA-PLK2	N		9		1
322	4C10	PLK3	Other:PLK:PLK2	1263	pEGFP-GFP-tag	N		1		8				1
323	4C11	PLK4	Other:PLK:SAK	10733	pXN-HA-Flag	N		1							9
324	4C12	SCYL1	Other:SCY1:	57410	pCMV-SPORT6-N-Flag	N		7		3
325	4D1	SCYL2	Other:SCY1:	55681	pXN-HA-Flag	N		6						4
326	4D2	SCYL3	Other:SCY1:	57147	pLX304/CMV/Flag	C		3				7
327	4D3	STKLD1	Other:SgK071:	169436	pXN-HA-Flag	N	1	9
328	4D4	PKDCC	Other:SgK493:	91461	pcDNA-C-Flag	C		1				8	1
329	4D5	PXK	Other:Slob:	54899	pXN-HA-FLAG	N
330	4D6	TBCK	Other:TBCK:	93627	pXN-HA-Flag	N		9		1
331	4D7	TLK1	Other:TLK:	9874	pXC-Flag	C	10
332	4D8	TLK2	Other:TLK:	11011	pXN-HA-Flag	N	10
333	4D9	PBK	Other:TOPK:	55872	pLX304/CMV/Flag	C	6	4
334	4D10	TTK	Other:TTK:	7272	pXN-HA-Flag	N	1	7		2
335	4D11	STK36	Other:ULK:Fused	27148	pXN-HA-Flag	N	4	6
336	4D12	ULK1	Other:ULK:ULK	8408	Flag-ULK1	N	3	6								1
337	4E1	ULK2	Other:ULK:ULK	9706	pLX304/CMV/Flag	C	3	5						2
338	4E2	ULK3	Other:ULK:ULK	25989	pRK7-N-Flag	N	2	6		2
339	4E3	ULK4	Other:ULK:ULK	54986	pXN-HA-Flag	N		9		1
340	4E4	PIK3R4	Other:VPS15:	30849	pXN-HA-Flag	N		10
341	4E5	PKMYT1	Other:WEE:Myt1	9088	pXN-HA-Flag	N	1					2	7
343	4E7	WEE1	Other:WEE:WEE1	7465	pXN-HA-Flag	N	10
345	4E9	WNK2	Other:WNK:	65268	pCMV-3XFlag-WNK2	N	1	9
347	4E11	WNK4	Other:WNK:	65266	pCMV-Myc-WNK4	N										10
348	4E12	FAM198A	PKL:FJ:	729085	pXN-HA-Flag	N						7	3
349	4F1	FAM198B	PKL:FJ:	51313	pXN-HA-Flag	N		2		1			7
350	4F2	FAM20A	PKL:FJ:	54757	pXN-HA-Flag	N						6	4
351	4F3	FAM20B	PKL:FJ:	9917	pXN-HA-Flag	N						8		2
352	4F4	FAM20C	PKL:FJ:	56975	pcDNA-C-Flag	C		2				7	1
353	4F5	FJX1	PKL:FJ:	24147	pXN-HA-Flag	N						7	3
354	4F6	GUCY2C	RGC:RGC:	2984	pXN-HA-Flag	N	2	6					2
356	4F8	GUCY2F	RGC:RGC:	2986	pXN-HA-Flag	N		4					6
358	4F10	NPR2	RGC:RGC:	4882	pcDNA-C-Flag	C		2					8
359	4F11	MAP3K15	STE:STE11:ASK	389840	pcDNA-C-Flag	C		10
360	4F12	MAP3K5	STE:STE11:ASK	4217	pLX304/CMV/Flag	C		10
361	4G1	MAP3K6	STE:STE11:ASK	9064	pXN-HA-Flag	N	3	3								4
364	4G4	MAP3K2	STE:STE11:MEKK2	10746	pXN-HA-Flag	N	2	8
365	4G5	MAP3K3	STE:STE11:MEKK2	4215	pCMV-3XFlag-MEKK3	N		10
367	4G7	OXSR1	STE:STE20:FRAY	9943	pLX304/CMV/Flag	C	3	7
368	4G8	STK39	STE:STE20:FRAY	27347	pXN-HA-Flag	N	2	6		2
369	4G9	MAP4K1	STE:STE20:KHS	11184	pXN-HA-Flag	N	2	8
370	4G10	MAP4K2	STE:STE20:KHS	5871	pXN-HA-Flag	N		6				4
371	4G11	MAP4K3	STE:STE20:KHS	8491	pcDNA-Flag	N			8					2
372	4G12	MAP4K5	STE:STE20:KHS	11183	pXN-HA-Flag	N		8		2
373	4H1	MAP4K4	STE:STE20:MSN	26921	pXN-HA-Flag	N		10
374	4H2	MINK1	STE:STE20:MSN	50488	pXN-HA-Flag	N		3						7
376	4H4	TNIK	STE:STE20:MSN	23043	HA-TNIK-PGW1	N		5		2				3
377	4H5	STK3	STE:STE20:MST	6788	pLX304/CMV/Flag	C		10
378	4H6	STK4	STE:STE20:MST	58231	Flag-STK4	N	3	7
380	4H8	MYO3B	STE:STE20:NinaC	329421	pXN-HA-Flag	N		10
381	4H9	PAK1	STE:STE20:PAKA	5058	pcDNA-C-Flag	C	3	7
382	4H10	PAK2	STE:STE20:PAKA	5062	pXN-HA-Flag	N	2	6		2
384	4H12	PAK4	STE:STE20:PAKB	10298	pLX304/CMV/Flag	C		5					5
385	5A1	PAK6	STE:STE20:PAKB	56924	pXN-HA-Flag	N				10
386	5A2	PAK5	STE:STE20:PAKB	57144	pLX304/CMV/Flag	C		2						8
387	5A3	SLK	STE:STE20:SLK	9748	Flag-SLK	N		10
388	5A4	STK10	STE:STE20:SLK	6793	pXC-Flag	C		8		2
389	5A5	STRADA	STE:STE20:STLK	92335	HA-STRADA	N	5	5
391	5A7	TAOK1	STE:STE20:TAO	57551	pRK5-N-Myc	N		8		2
392	5A8	TAOK2	STE:STE20:TAO	9344	pXC-Flag	C		4						3		3
393	5A9	TAOK3	STE:STE20:TAO	51347	pLX304/CMV/Flag	C	4	6
394	5A10	STK26	STE:STE20:YSK	51765	pXN-HA-Flag	N		4		2		4
395	5A11	STK24	STE:STE20:YSK	8428	pLX304/CMV/Flag	C		9		1
396	5A12	STK25	STE:STE20:YSK	10494	pLX304/CMV/Flag	C		6				4
397	5B1	MAP2K1	STE:STE7:MEK1	5604	pLX304/CMV/Flag	C		7		3
398	5B2	MAP2K2	STE:STE7:MEK1	5605	pLX304/CMV/Flag	C		7		3
399	5B3	MAP2K3	STE:STE7:MEK3	5606	pXN-HA-Flag	N	2	5		3
400	5B4	MAP2K6	STE:STE7:MEK3	5608	pLX304/CMV/Flag	C	3	5		2
401	5B5	MAP2K4	STE:STE7:MEK4	6416	pXN-HA-Flag	N	2	6		2
402	5B6	MAP2K5	STE:STE7:MEK5	5607	pLX304/CMV/Flag	C	3	6		1
403	5B7	MAP2K7	STE:STE7:MEK7	5609	pcDNA-Flag	N	2	6		2
404	5B8	MAP3K14	STE:STE-Unique:	9020	pXN-HA-Flag	N		10
405	5B9	MAP3K8	STE:STE-Unique:	1326	pXN-HA-Flag	N		8		2
406	5B10	ABL1	TK:Abl:	25	pLX304/CMV/Flag	C		6		4
407	5B11	ABL2	TK:Abl:	27	pXN-HA-Flag	N		4	6
408	5B12	TNK1	TK:Ack:	8711	pcDNA-C-Flag	C		6			4
409	5C1	TNK2	TK:Ack:	10188	pXC-Flag	C								8		2
410	5C2	ALK	TK:ALK:	238	pXN-HA-FLAG	N
412	5C4	AXL	TK:Axl:	558	pcDNA-C-Flag	C		1		7		2
413	5C5	MERTK	TK:Axl:	10461	pXC-Flag	C	1	8		1
414	5C6	TYRO3	TK:Axl:	7301	pLX304/CMV/Flag	C						7		3
415	5C7	PTK7	TK:CCK4:	5754	pXN-HA-Flag	N		10
416	5C8	CSK	TK:Csk:	1445	pLX304/CMV/Flag	C		8		2
417	5C9	MATK	TK:Csk:	4145	pLX304/CMV/Flag	C	2	5		3
418	5C10	DDR1	TK:DDR:	780	pLX304/CMV/Flag	C		1		8		1
419	5C11	DDR2	TK:DDR:	4921	pLX304/CMV/Flag	C		1		2		4		3
420	5C12	EGFR	TK:EGFR:	1956	pLX304/CMV/Flag	C		1		4		3		2
421	5D1	ERBB2	TK:EGFR:	2064	pLX304/CMV/Flag	C		2		7		1
422	5D2	ERBB3	TK:EGFR:	2065	pLX304/CMV/Flag	C		1		5		4
423	5D3	ERBB4	TK:EGFR:	2066	pLX304/CMV/Flag	C		1		4		5
424	5D4	EPHA1	TK:Eph:	2041	pLX304/CMV/Flag	C		1		6		3
425	5D5	EPHA10	TK:Eph:	284656	pXN-HA-Flag	N	5	5
426	5D6	EPHA2	TK:Eph:	1969	pLX304/CMV/Flag	C		1		1		3		5
427	5D7	EPHA3	TK:Eph:	2042	pXN-HA-Flag	N		1		6		3
428	5D8	EPHA4	TK:Eph:	2043	pcDNA-C-Flag	C		9					1
429	5D9	EPHA5	TK:Eph:	13839	pcDNA-C-Myc	C				8		2
430	5D10	EPHA6	TK:Eph:	13840	pXN-HA-Flag	N		3				3		4
432	5D12	EPHA8	TK:Eph:	2046	pLX304/CMV/Flag	C		3					7
433	5E1	EPHB1	TK:Eph:	2047	pLX304/CMV/Flag	C				5		4	1
435	5E3	EPHB3	TK:Eph:	2049	pXN-HA-Flag	N		10
437	5E5	EPHB6	TK:Eph:	2051	pXN-HA-Flag	N		8					2
438	5E6	PTK2	TK:FAK:	5747	pLX304/CMV/Flag	C		6		4
439	5E7	PTK2B	TK:FAK:	2185	pXN-HA-Flag	N		7		3
441	5E9	FES	TK:Fer:	2242	pLX304/CMV/Flag	C		6		4
442	5E10	FGFR1	TK:FGFR:	2260	pXC-Flag	C		1		2		3		4
444	5E12	FGFR3	TK:FGFR:	2261	pLX304/CMV/Flag	C		1		3		3		3
445	5F1	FGFR4	TK:FGFR:	2264	pXN-HA-Flag	N		5		5
446	5F2	IGF1R	TK:InsR:	3480	pXN-HA-Flag	N		10
447	5F3	INSR	TK:InsR:	3643	pXC-Flag	C		1		3		3	3
448	5F4	INSRR	TK:InsR:	3645	pXC-Flag	C		2		4			4
449	5F5	JAK1	TK:Jak: TK:JakB:	3716	pXN-HA-Flag	N		1		9
451	5F7	JAK3	TK:Jak: TK:JakB:	3718	pcDNA-C-Flag	C	2	5		3
452	5F8	TYK2	TK:Jak: TK:JakB:	7297	pLX304/CMV/Flag	C	5	5
454	5F10	LMTK2	TK:Lmr:	22853	pcDNA-C-Flag	C	9	1
456	5F12	MET	TK:Met:	4233	pXN-HA-Flag	N		7		3
457	5G1	MST1R	TK:Met:	4486	pLX304/CMV/Flag	C		7		3
458	5G2	MUSK	TK:Musk:	4593	pXC-Flag	C						4		6
461	5G5	KIT	TK:PDGFR:	3815	pXN-HA-Flag	N	1	7		2
462	5G6	PDGFRA	TK:PDGFR:	5156	pLX304/CMV/Flag	C		2		2		2		4
463	5G7	PDGFRB	TK:PDGFR:	5159	pXN-HA-Flag	N		10
464	5G8	RET	TK:Ret:	5979	pcDNA-C-3XFlag	C		1					9
465	5G9	ROR1	TK:Ror:	4919	pLX304/CMV/Flag	C		3				7
466	5G10	ROR2	TK:Ror:	4920	pLX304/CMV/Flag	C		1		9
467	5G11	RYK	TK:Ryk:	6259	pXN-HA-Flag	N		8					2
468	5G12	ROS1	TK:Sev:	6098	pXN-HA-Flag	N		8		2
469	5H1	FRK	TK:Src:Frk	2444	pLX304/CMV/Flag	C			1	7		2
470	5H2	FGR	TK:Src:SrcA	2268	pLX304/CMV/Flag	C		2	2	5		1
471	5H3	FYN	TK:Src:SrcA	2534	pXN-HA-Flag	N	2	6		2
472	5H4	SRC	TK:Src:SrcA	6714	pLX304/CMV/Flag	C		2		6		2
473	5H5	YES1	TK:Src:SrcA	7525	pXN-HA-Flag	N	1	3		6
474	5H6	BLK	TK:Src:SrcB	640	pLX304/CMV/Flag	C		1		7		2
475	5H7	HCK	TK:Src:SrcB	3055	pXN-HA-Flag	N	4	4		2
476	5H8	LCK	TK:Src:SrcB	3932	pXN-HA-Flag	N	3	5		2
477	5H9	LYN	TK:Src:SrcB	4067	pLX304/CMV/Flag	C		1	1	8
478	5H10	PTK6	TK:Src:SRM	5753	pLX304/CMV/Flag	C	3	4		3
479	5H11	SRMS	TK:Src:SRM	6725	pXN-HA-Flag	N		2		4				4
480	5H12	SYK	TK:Syk:	6850	pLX304/CMV/Flag	C	3	3		4
481	6A1	ZAP70	TK:Syk:	7535	pLX304/CMV/Flag	C	3	5		2
482	6A2	BMX	TK:Tec:	660	pLX304/CMV/Flag	C	3	4		3
483	6A3	BTK	TK:Tec:	695	pLX304/CMV/Flag	C	1	5		4
484	6A4	ITK	TK:Tec:	3702	pXN-HA-Flag	N	2	3		5
485	6A5	TEC	TK:Tec:	7006	pXN-HA-Flag	N		2		2				6
486	6A6	TXK	TK:Tec:	7294	pXN-HA-Flag	N		2				4		4
487	6A7	TEK	TK:Tie:	7010	pXN-HA-Flag	N		10
489	6A9	STYK1	TK:TK-Unique:	55359	pLX304/CMV/Flag	C							4			6
490	6A10	NTRK1	TK:Trk:	4914	pLX304/CMV/Flag	C		2		3		3	2
491	6A11	NTRK2	TK:Trk:	4915	pEGFP-N1-TrkB	C						6		4
492	6A12	NTRK3	TK:Trk:	4916	pLX304/CMV/Flag	C		4		4		2
494	6B2	FLT4	TK:VEGFR:	2324	pLX304/CMV/Flag	C		3		3		4
495	6B3	KDR	TK:VEGFR:	3791	pcDNA-C-3Xflag	C
496	6B4	IRAK1	TKL:IRAK:	3654	pXN-HA-Flag	N		10
497	6B5	IRAK2	TKL:IRAK:	3656	pLX304/CMV/Flag	C	2	6		2
498	6B6	IRAK3	TKL:IRAK:	11213	pLX304/CMV/Flag	C	4	3	3
499	6B7	IRAK4	TKL:IRAK:	51135	pLX304/CMV/FLAG	C
500	6B8	LIMK1	TKL:LISK:LIMK	3984	pLX304/CMV/Flag	C		7		1						2
501	6B9	LIMK2	TKL:LISK:LIMK	3985	pLX304/CMV/Flag	C		6			4
502	6B10	TESK1	TKL:LISK:TESK	7016	pcDNA-C-Flag	C	1	6		3
503	6B11	TESK2	TKL:LISK:TESK	10420	pXN-HA-Flag	N	3	3						2		2
504	6B12	LRRK1	TKL:LRRK:	79705	pXN-HA-Flag	N		10
506	6C2	TNNI3K	TKL:MLK:HH498	51086	pXC-Flag	C	3	4		3
507	6C3	ILK	TKL:MLK:ILK	3611	pLX304/CMV/Flag	C	3	6		1
508	6C4	MAP3K12	TKL:MLK:LZK	7786	pXN-HA-Flag	N		3		2		5
509	6C5	MAP3K13	TKL:MLK:LZK	9175	pXN-HA-Flag	N		2		2		6
511	6C7	MAP3K10	TKL:MLK:MLK	4294	pXN-HA-Flag	N		9		1
512	6C8	MAP3K11	TKL:MLK:MLK	4296	pXN-HA-Flag	N		9		1
513	6C9	MAP3K9	TKL:MLK:MLK	4293	pXN-Myc-His	N	1	9
514	6C10	MAP3K7	TKL:MLK:TAK1	6885	pXC-Flag	C		9								1
515	6C11	MAP3K20	TKL:MLK:ZAK	51776	pLX304/CMV/Flag	C	5	5
516	6C12	KSR1	TKL:RAF:KSR	8844	pXN-HA-Flag	N		8		2
517	6D1	KSR2	TKL:RAF:KSR	283455	pcDNA3-C-Flag	C		5		5
518	6D2	ARAF	TKL:RAF:RAF	369	pXN-HA-Flag	N		3	1	6
519	6D3	BRAF	TKL:RAF:RAF	673	pXN-HA-Flag	N		7		3
520	6D4	RAF1	TKL:RAF:RAF	5894	pXN-HA-Flag	N	3	5		2
521	6D5	ANKK1	TKL:RIPK:	255239	pXN-HA-Flag	N	2	7		1
522	6D6	RIPK1	TKL:RIPK:	8737	pLX304/CMV/Flag	C		10
523	6D7	RIPK2	TKL:RIPK:	8767	pLX304/CMV/Flag	C	2	8
524	6D8	RIPK3	TKL:RIPK:	11035	pXN-HA-Flag	N		10
525	6D9	RIPK4	TKL:RIPK:	54101	pXN-HA-Flag	N		5						5
527	6D11	ACVR1B	TKL:STKR:STKR1	91	pXN-HA-Flag	N		4				1	5
528	6D12	ACVR1C	TKL:STKR:STKR1	130399	pXN-HA-Flag	N		6					4
529	6E1	ACVRL1	TKL:STKR:STKR1	94	pXN-HA-Flag	N		10
530	6E2	BMPR1A	TKL:STKR:STKR1	657	pXC-Flag	C		1		6		3
531	6E3	BMPR1B	TKL:STKR:STKR1	658	pXN-HA-Flag	N		4					6
532	6E4	TGFBR1	TKL:STKR:STKR1	7046	pCMV-C-HA	C				3		3	4
533	6E5	ACVR2A	TKL:STKR:STKR2	92	pXN-HA-Flag	N		5					5
534	6E6	ACVR2B	TKL:STKR:STKR2	93	pXN-HA-Flag	N		6				4
535	6E7	AMHR2	TKL:STKR:STKR2	269	pXC-Flag	C		3					6			1
536	6E8	BMPR2	TKL:STKR:STKR2	659	LNCX BMP-RII-C-Flag	C		1		4		3	2
537	6E9	TGFBR2	TKL:STKR:STKR2	7048	pXN-HA-Flag	N		8		2
538	6E10	MLKL	TKL:TKL-Unique:	197259	pXN-HA-Flag	N		6		4

## Sheet: Revised kinases
#	Official Symbol	Classification	Gene ID	Plasmid in initial screen	Original Localization Score										Plasmid in confirmation experiments	New Localization Score
					N	C	CS	PM	MI	GL	ER	V	CT	AG		N	C	CS	PM	MI	GL	ER	V	CT	AG
6	1A6	CDC42BPB	9578	pXN-HA-Flag		5						5			pcDNA-C-Myc	1			9
26	1C2	STK38L	23012	pXN-HA-Flag		5						5			pcDNA-C-Myc	6			4
46	1D10	PKN3	29941	pXN-HA-Flag		10									pcDNA-C-Myc				7	3
64	1F4	ADCK3	56997	pXN-HA-Flag		9						1			pcDNA-C-Myc					10
90	1H6	PDK2	5164	pXN-HA-Flag	1	6		3							pcDNA-C-Myc					10
162	2F6	PRKD1	5587	pXN-HA-Flag		5		2		3					pcDNA-C-Myc	1			7		2
261	3F9	NME4	4833	pXN-HA-Flag	1	6						3			pcDNA-C-Myc					10
350	4F2	FAM20A	54757	pXN-HA-Flag						6	4				pcDNA-C-Myc				6		2		2
369	4G9	MAP4K1	11184	pXN-HA-Flag	2	8									pcDNA-C-Myc	3	4		3
370	4G10	MAP4K2	5871	pXN-HA-Flag		6				4					pcDNA-C-Myc	2	2		6
374	4H2	MINK1	50488	pXN-HA-Flag		3						7			pcDNA-C-Myc		5		3				2
415	5C7	PTK7	5754	pXN-HA-Flag		10									pcDNA-C-Myc	1						9
425	5D5	EPHA10	284656	pXN-HA-Flag	5	5									pcDNA-C-Myc		2				7	1
430	5D10	EPHA6	13840	pXN-HA-Flag		3				3		4			pcDNA-C-Myc				4		6
446	5F2	IGF1R	3480	pXN-HA-Flag		10									pcDNA-C-Myc				8			2
487	6A7	TEK	7010	pXN-HA-Flag		10									pcDNA-C-Myc				10
496	6B4	IRAK1	3654	pXN-HA-Flag		10									pcDNA-C-Myc				7			3
512	6C8	MAP3K11	4296	pXN-HA-Flag		9		1							pcDNA-C-Myc	2				8
527	6D11	ACVR1B	91	pXN-HA-Flag		4				1	5				pcDNA-C-Myc				6		4
528	6D12	ACVR1C	130399	pXN-HA-Flag		6					4				pcDNA-C-Myc				6		2	2
529	6E1	ACVRL1	94	pXN-HA-Flag		10									pcDNA-C-Myc				7		3
60	1E12	SGK3	23678	pXN-HA-Flag		2				5		3			pXN-HA-Flag		2				2		6
371	4G11	MAP4K3	8491	pcDNA-N-Flag			8					2			pcDNA-N-Flag		2	3				5
39	1D3	PRKCH	5583	pLX304/CMV/Flag		3					5	2			pLX304/CMV/Flag		1			5		4
414	5C6	TYRO3	7301	pLX304/CMV/Flag						7		3			pLX304/CMV/Flag								10
384	4H12	PAK4	10298	pLX304/CMV/Flag		5					5				pLX304/CMV/Flag		6								4
465	5G9	ROR1	4919	pLX304/CMV/Flag		3				7					pLX304/CMV/Flag		3					7
