# Supplementary material for: A subcellular map of the human kinome
Source: eLife. 2021 May 14;10:e64943. doi: 10.7554/eLife.64943 (PMC8175086; doi:10.7554/eLife.64943)
Supplement: Supplementary file 3. [file elife-64943-supp3.xlsx]

## Sheet: COMP knowledge high confi
#	Official Symbol	Classification	Gene ID	5 STAR 1	5 STAR 2	5 STAR 3	5 STAR 4	5 STAR 5	5 STAR 6	5 STAR 7	4 STAR 1	4 STAR 2	4 STAR 3	4 STAR 4
1	AKT1	AGC:Akt:	207	N	C	PM	V
2	AKT2	AGC:Akt:	208	N							C	PM
4	CIT	AGC:DMPK:CRIK	11113								C	PM
5	CDC42BPA	AGC:DMPK:GEK	8476	CS							PM	Ex S
6	CDC42BPB	AGC:DMPK:GEK	9578	CS							PM	Ex S
7	CDC42BPG	AGC:DMPK:GEK	55561								PM
8	DMPK	AGC:DMPK:GEK	1760	MI							C	PM	ER
9	ROCK1	AGC:DMPK:ROCK	6093								PM	C	Ex S
10	ROCK2	AGC:DMPK:ROCK	9475	CT	N						V
11	GRK2	AGC:GRK:BARK	156								C	PM
12	GRK3	AGC:GRK:BARK	157								C	PM
14	GRK4	AGC:GRK:GRK	2868	C	PM
15	GRK5	AGC:GRK:GRK	2869	N	C	PM
16	GRK6	AGC:GRK:GRK	2870	PM
22	MASTL	AGC:MAST:MASTL	84930	N	CT	CS
23	LATS1	AGC:NDR:LATS	9113	C	CS
24	LATS2	AGC:NDR:LATS	26524	N	C	CS
25	STK38	AGC:NDR:NDR	11329	N	C
26	STK38L	AGC:NDR:NDR	23012	C	CS	PM
27	PDPK1	AGC:PDK1:	5170	N	C	PM
28	PRKACA	AGC:PKA:	5566	N	C	PM	CS
29	PRKACB	AGC:PKA:	5567	CT							N	PM	Ex S
30	PRKACG	AGC:PKA:	5568								N	C	PM
31	PRKX	AGC:PKA:	5613	N	C
33	PRKCA	AGC:PKC:PKCa	5578	C	PM						MI	N	ER	Ex S
34	PRKCB	AGC:PKC:PKCa	5579	N	C	PM					Ex S
35	PRKCG	AGC:PKC:PKCa	5582	C	PM
36	PRKCD	AGC:PKC:PKCd	5580	C	PM	N	ER				Ex S
37	PRKCQ	AGC:PKC:PKCd	5588	C	PM
38	PRKCE	AGC:PKC:PKCh	5581	C	PM						ER
39	PRKCH	AGC:PKC:PKCh	5583	C	PM						Ex S
40	PRKCI	AGC:PKC:PKCi	5584	C	N						PM	Ex S
42	PRKG1	AGC:PKG:	5592	C	PM
43	PRKG2	AGC:PKG:	5593	C
44	PKN1	AGC:PKN:	5585	CS	C	V	N
45	PKN2	AGC:PKN:	5586	N	C	PM	CS
46	PKN3	AGC:PKN:	29941								N	GL
47	RPS6KA4	AGC:RSK:MSK CAMK:RSKb:MSKb	8986	N
48	RPS6KA5	AGC:RSK:MSK CAMK:RSKb:MSKb	9252	N	C
49	RPS6KB1	AGC:RSK:RSKp70	6198	N	C	MI
50	RPS6KB2	AGC:RSK:RSKp70	6199	N	C
51	RPS6KA1	AGC:RSK:RSKp90 CAMK:RSKb:RSKb	6195	N	C
52	RPS6KA2	AGC:RSK:RSKp90 CAMK:RSKb:RSKb	6196	N	C
53	RPS6KA3	AGC:RSK:RSKp90 CAMK:RSKb:RSKb	6197								N	C
55	RPS6KC1	AGC:RSKL:	26750	V
58	SGK1	AGC:SGK:	6446	ER	N	PM	C	MI
59	SGK2	AGC:SGK:	10110	C
60	SGK3	AGC:SGK:	23678	V							C
64	COQ8A	Atypical:ABC1:ABC1-A	56997	MI
65	COQ8B	Atypical:ABC1:ABC1-A	79934	MI
69	ALPK1	Atypical:Alpha:Alpha-Unclassified	80216	C
72	TRPM6	Atypical:Alpha:ChaK	140803								PM
73	TRPM7	Atypical:Alpha:ChaK	54822								PM
74	EEF2K	Atypical:Alpha:eEF2K	29904								C
75	BAZ1A	Atypical:BAZ:	11177	N
77	ABR	Atypical:BCR:	29								C	PM
78	BCR	Atypical:BCR:	613								PM	C	Ex S
79	BLVRA	Atypical:BLVRA:	644	C							Ex S
82	BRD4	Atypical:BRD:	23476	N
83	BRDT	Atypical:BRD:	676								N
84	CERT1	Atypical:Col4A3BP:	10087	GL							ER
86	STK19	Atypical:G11:	8859	N
87	GTF2F1	Atypical:GTF2F1:	2962	N
88	BCKDK	Atypical:PDHK:BCKDK	10295	MI
89	PDK1	Atypical:PDHK:PDHK	5163	N	C	PM
90	PDK2	Atypical:PDHK:PDHK	5164	MI
91	PDK3	Atypical:PDHK:PDHK	5165	MI
92	PDK4	Atypical:PDHK:PDHK	5166	MI
93	ATM	Atypical:PIKK:ATM	472	C
94	ATR	Atypical:PIKK:ATR	545	N
95	PRKDC	Atypical:PIKK:DNAPK	5591	N							PM	C
96	MTOR	Atypical:PIKK:FRAP	2475	V	C						N
97	SMG1	Atypical:PIKK:SMG1	23049	N	C
98	TRRAP	Atypical:PIKK:TRRAP	8295	N
99	RIOK1	Atypical:RIO:RIO1	83732	C							N
100	RIOK2	Atypical:RIO:RIO2	55781								N	C
101	RIOK3	Atypical:RIO:RIO3	8780	C
102	TAF1	Atypical:TAF1:	6872								N
103	TAF1L	Atypical:TAF1:	138474								N
104	TRIM24	Atypical:TIF1:	8805	N							C
105	TRIM28	Atypical:TIF1:	10155	N
106	TRIM33	Atypical:TIF1:	51592	N
107	TRIM66	Atypical:TIF1:	9866	N
108	CAMK1	CAMK:CAMK1:	8536								C
109	CAMK1D	CAMK:CAMK1:	57118	N	C
111	CAMK4	CAMK:CAMK1:	814	N	C						Ex S
113	CAMK2A	CAMK:CAMK2:	815	PM							N	C	V
114	CAMK2B	CAMK:CAMK2:	816								C	N	V
115	CAMK2D	CAMK:CAMK2:	817								PM	V	N	C
116	CAMK2G	CAMK:CAMK2:	818								N	V	C
117	PRKAA1	CAMK:CAMKL:AMPK	5562								N	C
118	PRKAA2	CAMK:CAMKL:AMPK	5563								N	C
119	BRSK1	CAMK:CAMKL:BRSK	84446	C	N						CT
120	BRSK2	CAMK:CAMKL:BRSK	9024	C	ER	CT
121	CHEK1	CAMK:CAMKL:CHK1	1111	C	CT	N					Ex S
123	STK11	CAMK:CAMKL:LKB	6794	N	C	MI					PM
124	MARK1	CAMK:CAMKL:MARK	4139	C	PM						CS
125	MARK2	CAMK:CAMKL:MARK	2011	C	CS	PM					MI
126	MARK3	CAMK:CAMKL:MARK	4140	C	PM						Ex S
127	MARK4	CAMK:CAMKL:MARK	57787	C	CT	CS
128	MELK	CAMK:CAMKL:MELK	9833	PM
132	PASK	CAMK:CAMKL:PASK	23178	N	C
134	SIK2	CAMK:CAMKL:QIK	23235	C
136	SNRK	CAMK:CAMKL:SNRK	54861	N
138	CASK	CAMK:CASK:	8573								N	C	PM	CS
139	DAPK1	CAMK:DAPK:DAPK	1612	C	CS	PM
140	DAPK2	CAMK:DAPK:DAPK	23604	C
141	DAPK3	CAMK:DAPK:DAPK	1613	N
142	STK17A	CAMK:DAPK:DRAK	9263	N
143	STK17B	CAMK:DAPK:DRAK	9262	N
144	DCLK1	CAMK:DCAMKL:	9201								PM
145	DCLK2	CAMK:DCAMKL:	166614	CS
147	MAPKAPK2	CAMK:MAPKAPK:MK2	9261	N	C						Ex S
148	MAPKAPK3	CAMK:MAPKAPK:MK2	7867								C
149	MAPKAPK5	CAMK:MAPKAPK:MK5	8550	N	C
150	MKNK1	CAMK:MAPKAPK:MNK	8569	N	C
151	MKNK2	CAMK:MAPKAPK:MNK	2872	C	N
152	MYLK	CAMK:MLCK:	4638	C	PM	CS
153	MYLK2	CAMK:MLCK:	85366	N	C
154	MYLK3	CAMK:MLCK:	91807	C
156	TTN	CAMK:MLCK:	7273								N	C	Ex S
157	PHKG1	CAMK:PHK:	5260	C
159	PIM1	CAMK:PIM:	5292	PM	N	C
162	PRKD1	CAMK:PKD:	5587	GL							V
163	PRKD2	CAMK:PKD:	25865								N	C
165	PSKH1	CAMK:PSK:	5681	GL	C	ER	N	CT	PM
167	CHEK2	CAMK:RAD53:	11200	N
170	TRIB1	CAMK:Trbl:	10221								N	C
171	TRIB2	CAMK:Trbl:	28951								C
172	TRIB3	CAMK:Trbl:	57761								N	C	PM
173	KALRN	CAMK:Trio:	8997								CS	Ex S
174	TRIO	CAMK:Trio:	7204								C	PM
176	SPEG	CAMK:Trio: CAMK:Trio:	10290	N
178	TSSK2	CAMK:TSSK:	23617								N	C
181	TSSK6	CAMK:TSSK:	83983								N
182	CSNK1A1	CK1:CK1:CK1-A	1452	CT	N
183	CSNK1A1L	CK1:CK1:CK1-A	122011								C
184	CSNK1D	CK1:CK1:CK1-D	1453	C	CS	PM	CT				N	ER	GL
185	CSNK1E	CK1:CK1:CK1-D	1454								N	C
186	CSNK1G1	CK1:CK1:CK1-G	53944	C
187	CSNK1G2	CK1:CK1:CK1-G	1455								C
188	CSNK1G3	CK1:CK1:CK1-G	1456	C
190	TTBK2	CK1:TTBK:	146057	CT	C	N					Ex S
191	VRK1	CK1:VRK:	7443	N	GL
192	VRK2	CK1:VRK:	7444	MI	N	C	ER
193	VRK3	CK1:VRK:	51231								N
195	CDK1	CMGC:CDK:CDC2	983	MI	CT	CS					ER	N	C	Ex S
197	CDK11A	CMGC:CDK:CDK11	728642	N	C
198	CDK11B	CMGC:CDK:CDK11	984	N	C
199	CDK2	CMGC:CDK:CDK2	1017	N	CT	V
201	CDK4	CMGC:CDK:CDK4	1019	N	C
202	CDK6	CMGC:CDK:CDK4	1021	CT							N	C
203	CDK5	CMGC:CDK:CDK5	1020	N							PM	C
204	CDK7	CMGC:CDK:CDK7	1022	C	N
206	CDK8	CMGC:CDK:CDK8	1024	N
207	CDK9	CMGC:CDK:CDK9	1025	C	N
208	CDK12	CMGC:CDK:CRK7	51755	N
209	CDK13	CMGC:CDK:CRK7	8621	N							Ex S
210	CDK16	CMGC:CDK:PCTAIRE	5127	C	PM
213	CDK14	CMGC:CDK:PFTAIRE	5218	N	C	PM
219	CDKL5	CMGC:CDKL:	6792	CT							N
220	CSNK2A1	CMGC:CK2:	1457	N							PM
221	CSNK2A2	CMGC:CK2:	1459	N							C
222	CLK1	CMGC:CLK:	1195	N
223	CLK2	CMGC:CLK:	1196	N
224	CLK3	CMGC:CLK:	1198	N							PM
226	DYRK1A	CMGC:DYRK:DYRK1	1859	C	N
227	DYRK1B	CMGC:DYRK:DYRK1	9149	N
228	DYRK2	CMGC:DYRK:DYRK2	8445	N	C
229	DYRK3	CMGC:DYRK:DYRK2	8444	N	C
231	HIPK1	CMGC:DYRK:HIPK	204851	N	C
232	HIPK2	CMGC:DYRK:HIPK	15258	N	C
235	PRPF4B	CMGC:DYRK:PRP4	8899	N
236	GSK3A	CMGC:GSK:	2931								PM
237	GSK3B	CMGC:GSK:	2932	N	C	CT	PM
238	MAPK1	CMGC:MAPK:ERK1	5594	PM	C	CS	MI	V
239	MAPK3	CMGC:MAPK:ERK1	5595	PM	MI	V	C	CS
240	MAPK4	CMGC:MAPK:ERK3	5596								N	C
241	MAPK6	CMGC:MAPK:ERK3	5597								N	C
242	MAPK7	CMGC:MAPK:ERK5	5598	N	C
243	MAPK15	CMGC:MAPK:ERK7	332110	N	C	GL	PM	Ex S
244	MAPK10	CMGC:MAPK:JNK	5602								PM	N	C	MI
245	MAPK8	CMGC:MAPK:JNK	5599								N	C
246	MAPK9	CMGC:MAPK:JNK	5601								N	C
247	NLK	CMGC:MAPK:nmo	51701								N	C
248	MAPK11	CMGC:MAPK:p38	5600								N	C
249	MAPK12	CMGC:MAPK:p38	6300	MI	N	C
250	MAPK13	CMGC:MAPK:p38	5603								C
251	MAPK14	CMGC:MAPK:p38	1432								N	C	Ex S
252	CILK1	CMGC:RCK:MAK	22858	N
253	MAK	CMGC:RCK:MAK	4117	N	CS	CT
254	MOK	CMGC:RCK:MOK	5891	N
255	SRPK1	CMGC:SRPK:	6732	N	C
256	SRPK2	CMGC:SRPK:	6733	C	N
258	NME1	NDK:NDK:	4830	C	N	PM					Ex S
259	NME2	NDK:NDK:	4831	C							N	Ex S
260	NME3	NDK:NDK:	4832								C
261	NME4	NDK:NDK:	4833								MI
263	NME6	NDK:NDK:	10201	MI
264	NME7	NDK:NDK:	29922	CT							C
267	AURKA	Other:Aur:	6790	CS	CT						N	C
268	AURKB	Other:Aur:	9212	N	CS						C
269	AURKC	Other:Aur:	6795	N	CS
270	BUB1	Other:BUB:	699	N
271	BUB1B	Other:BUB:	701	CS	CT	N					C
272	TP53RK	Other:Bud32:	112858	N	C
273	CAMKK1	Other:CAMKK:CAMKK-Meta	84254								N	C
274	CAMKK2	Other:CAMKK:CAMKK-Meta	10645								N
275	CDC7	Other:CDC7:	8317	N							C
276	DSTYK	Other:Dusty:	25778	C	PM
277	HASPIN	Other:Haspin:	83903	N	CT	C
278	CHUK	Other:IKK:	1147	C
280	IKBKE	Other:IKK:	9641	N	C						V
281	TBK1	Other:IKK:	29110	C							N	V
282	ERN1	Other:IRE:	2081	ER	C
284	UHMK1	Other:KIS:	127933								N
285	MOS	Other:MOS:	4342								C
286	AAK1	Other:NAK:BIKE	22848								V	PM	C
288	GAK	Other:NAK:GAK	2580								V	C	GL	PM
290	NEK1	Other:NEK:NEK1	4750	C	N						CT
291	NEK3	Other:NEK:NEK1	4752	N
294	NEK11	Other:NEK:NEK11	79858	N
295	NEK2	Other:NEK:NEK2	4751	C	CT	N
296	NEK4	Other:NEK:NEK4	23955								C
297	NEK6	Other:NEK:NEK6	10783	N	C	CT
298	NEK7	Other:NEK:NEK6	140609								C
300	NEK9	Other:NEK:NEK9	91754								C
304	PINK1	Other:NKF2:	65018	MI	ER	C					CS	PM
305	PEAK1	Other:NKF3:	79834	PM	CS
306	PRAG1	Other:NKF3:	157285	PM							N	C
308	STK35	Other:NKF4:	140901	N	C
309	TEX14	Other:NKF5:	56155								PM	CS	Ex S
310	NRBP1	Other:NRBP:	29959								N
311	NRBP2	Other:NRBP:	223649								C
312	RNASEL	Other:Other-Unique:	6041								MI	C
315	PAN3	Other:PAN3:	255967								C
316	EIF2AK4	Other:PEK:GCN2 STE:STE-Unique:	27103	C
318	EIF2AK3	Other:PEK:PEK	9451	ER							C
319	EIF2AK2	Other:PEK:PKR	5610	N	C
320	PLK1	Other:PLK:PLK1	5347	N	CS	CT					C
321	PLK2	Other:PLK:PLK2	10769	CT							C
322	PLK3	Other:PLK:PLK2	1263	CT	C	N	GL
323	PLK4	Other:PLK:SAK	10733	CT	CS	N
324	SCYL1	Other:SCY1:	57410	GL	ER	CT	C
325	SCYL2	Other:SCY1:	55681	GL	C	V
326	SCYL3	Other:SCY1:	57147	C	GL	PM
328	PKDCC	Other:SgK493:	91461	Ex S							GL
329	PXK	Other:Slob:	54899	N	C
330	TBCK	Other:TBCK:	93627	C	CS
331	TLK1	Other:TLK:	9874	N
332	TLK2	Other:TLK:	11011	N	C	CS
333	PBK	Other:TOPK:	55872								N
334	TTK	Other:TTK:	7272	C
335	STK36	Other:ULK:Fused	27148	N	C
336	ULK1	Other:ULK:ULK	8408	C							MI	ER
337	ULK2	Other:ULK:ULK	9706	C
338	ULK3	Other:ULK:ULK	25989	C
340	PIK3R4	Other:VPS15:	30849	C	V						CS
341	PKMYT1	Other:WEE:Myt1	9088								ER	GL	C	N
344	WNK1	Other:WNK:	65125	C
345	WNK2	Other:WNK:	65268	C
346	WNK3	Other:WNK:	65267	C
347	WNK4	Other:WNK:	65266								PM
348	FAM198A	PKL:FJ:	729085								ER	GL	Ex S
349	FAM198B	PKL:FJ:	51313								GL
350	FAM20A	PKL:FJ:	54757	Ex S							ER
351	FAM20B	PKL:FJ:	9917	GL
352	FAM20C	PKL:FJ:	56975	GL	Ex S						ER
356	GUCY2F	RGC:RGC:	2986								N
357	NPR1	RGC:RGC:	4881	PM
358	NPR2	RGC:RGC:	4882	PM
360	MAP3K5	STE:STE11:ASK	4217	ER	C
362	MAP3K1	STE:STE11:MEKK1	4214								C
365	MAP3K3	STE:STE11:MEKK2	4215								C
366	MAP3K4	STE:STE11:MEKK4	4216	C
367	OXSR1	STE:STE20:FRAY	9943	Ex S
369	MAP4K1	STE:STE20:KHS	11184								PM
370	MAP4K2	STE:STE20:KHS	5871								GL
372	MAP4K5	STE:STE20:KHS	11183	C
373	MAP4K4	STE:STE20:MSN	26921	C							PM
374	MINK1	STE:STE20:MSN	50488	GL	C						Ex S
376	TNIK	STE:STE20:MSN	23043	N	C	CS	PM	V
377	STK3	STE:STE20:MST	6788	PM							C
378	STK4	STE:STE20:MST	58231	N	C
379	MYO3A	STE:STE20:NinaC	53904	C	PM	CS
381	PAK1	STE:STE20:PAKA	5058	PM	N	C
382	PAK2	STE:STE20:PAKA	5062	C	N	PM
383	PAK3	STE:STE20:PAKA	5063								C	PM
384	PAK4	STE:STE20:PAKB	10298								GL	PM
385	PAK6	STE:STE20:PAKB	56924	N	C
386	PAK5	STE:STE20:PAKB	57144	N	C	MI
387	SLK	STE:STE20:SLK	9748	C							PM	Ex S
388	STK10	STE:STE20:SLK	6793	PM							Ex S
389	STRADA	STE:STE20:STLK	92335	N	C
390	STRADB	STE:STE20:STLK	55437	N	C
391	TAOK1	STE:STE20:TAO	57551								C	Ex S
392	TAOK2	STE:STE20:TAO	9344	N	V	CS
394	STK26	STE:STE20:YSK	51765	PM	C	V	GL				Ex S
395	STK24	STE:STE20:YSK	8428	N	C	GL					PM	Ex S
396	STK25	STE:STE20:YSK	10494	C							Ex S
397	MAP2K1	STE:STE7:MEK1	5604	PM	N	ER	GL	V	MI
398	MAP2K2	STE:STE7:MEK1	5605	C	N	PM	MI	GL	V	CS
399	MAP2K3	STE:STE7:MEK3	5606								N	C	PM
401	MAP2K4	STE:STE7:MEK4	6416								C
403	MAP2K7	STE:STE7:MEK7	5609								N	C
404	MAP3K14	STE:STE-Unique:	9020	C
406	ABL1	TK:Abl:	25	C	CS	N					MI
407	ABL2	TK:Abl:	27	CS							C
408	TNK1	TK:Ack:	8711	C	PM
409	TNK2	TK:Ack:	10188	N	C	PM	V
410	ALK	TK:ALK:	238	PM							Ex S
411	LTK	TK:ALK:	4058	PM
412	AXL	TK:Axl:	558	PM	Ex S
413	MERTK	TK:Axl:	10461	C	Ex S						PM
414	TYRO3	TK:Axl:	7301	PM							N	ER
415	PTK7	TK:CCK4:	5754	PM
416	CSK	TK:Csk:	1445								C	PM	Ex S
417	MATK	TK:Csk:	4145								C
418	DDR1	TK:DDR:	780	PM							Ex S
419	DDR2	TK:DDR:	4921								PM
420	EGFR	TK:EGFR:	1956	V	PM	N	C
421	ERBB2	TK:EGFR:	2064	N	C	PM
422	ERBB3	TK:EGFR:	2065	PM	Ex S
423	ERBB4	TK:EGFR:	2066	N	MI	PM					C
424	EPHA1	TK:Eph:	2041	PM
425	EPHA10	TK:Eph:	284656	PM
426	EPHA2	TK:Eph:	1969	PM
427	EPHA3	TK:Eph:	2042	PM	V
428	EPHA4	TK:Eph:	2043								C	PM	V
429	EPHA5	TK:Eph:	13839	C	PM
430	EPHA6	TK:Eph:	13840								PM
431	EPHA7	TK:Eph:	2045								PM
432	EPHA8	TK:Eph:	2046								PM
433	EPHB1	TK:Eph:	2047	V	PM
434	EPHB2	TK:Eph:	2048								C	PM	Ex S
435	EPHB3	TK:Eph:	2049	PM							C	Ex S
436	EPHB4	TK:Eph:	2050	PM							C	Ex S
437	EPHB6	TK:Eph:	2051	PM							C
438	PTK2	TK:FAK:	5747	CS	N	C	PM
439	PTK2B	TK:FAK:	2185	PM	N	C
440	FER	TK:Fer:	2241	PM	N	C	CS
441	FES	TK:Fer:	2242	C	GL	CS	PM
442	FGFR1	TK:FGFR:	2260	N	C	PM
443	FGFR2	TK:FGFR:	2263	N	C	CS	PM	GL	Ex S
444	FGFR3	TK:FGFR:	2261	PM	V	GL
445	FGFR4	TK:FGFR:	2264	PM	GL	ER	V	Ex S
446	IGF1R	TK:InsR:	3480	PM
447	INSR	TK:InsR:	3643	PM	V
448	INSRR	TK:InsR:	3645	PM
449	JAK1	TK:Jak: TK:JakB:	3716								C	V	N	PM
450	JAK2	TK:Jak: TK:JakB:	3717	N							C	PM	V
451	JAK3	TK:Jak: TK:JakB:	3718								V	C	PM
452	TYK2	TK:Jak: TK:JakB:	7297								N	C	Ex S
454	LMTK2	TK:Lmr:	22853	PM	GL	V	C
456	MET	TK:Met:	4233	PM	Ex S
457	MST1R	TK:Met:	4486	PM
458	MUSK	TK:Musk:	4593	PM
459	CSF1R	TK:PDGFR:	1436	PM
460	FLT3	TK:PDGFR:	2322	PM	ER
461	KIT	TK:PDGFR:	3815	PM	C						Ex S
462	PDGFRA	TK:PDGFR:	5156	PM	GL	N					C
463	PDGFRB	TK:PDGFR:	5159	PM							N	C
464	RET	TK:Ret:	5979	PM	V
465	ROR1	TK:Ror:	4919	PM							C
466	ROR2	TK:Ror:	4920								PM	V
467	RYK	TK:Ryk:	6259	PM							C	N
468	ROS1	TK:Sev:	6098	PM
469	FRK	TK:Src:Frk	2444	Ex S
470	FGR	TK:Src:SrcA	2268								C	Ex S
471	FYN	TK:Src:SrcA	2534	PM	C	N					V
472	SRC	TK:Src:SrcA	6714	MI	PM	C	V
473	YES1	TK:Src:SrcA	7525	GL	CT	C	PM				Ex S
474	BLK	TK:Src:SrcB	640								C
475	HCK	TK:Src:SrcB	3055	V	PM	C
476	LCK	TK:Src:SrcB	3932	PM							C	Ex S
477	LYN	TK:Src:SrcB	4067	PM	N	GL					C	Ex S
478	PTK6	TK:Src:SRM	5753	N	C
479	SRMS	TK:Src:SRM	6725	C
480	SYK	TK:Syk:	6850	N	C						PM
481	ZAP70	TK:Syk:	7535								C	PM
482	BMX	TK:Tec:	660								C
483	BTK	TK:Tec:	695	N	C	PM
484	ITK	TK:Tec:	3702								N	C
485	TEC	TK:Tec:	7006	C	CS	PM
486	TXK	TK:Tec:	7294	N	C
487	TEK	TK:Tie:	7010	PM
489	STYK1	TK:TK-Unique:	55359								PM
490	NTRK1	TK:Trk:	4914	PM							V	GL
491	NTRK2	TK:Trk:	4915	PM							V	GL
492	NTRK3	TK:Trk:	4916	PM
493	FLT1	TK:VEGFR:	2321	V	PM
494	FLT4	TK:VEGFR:	2324	PM	C
495	KDR	TK:VEGFR:	3791	N	C	V	PM	ER	GL
496	IRAK1	TKL:IRAK:	3654								PM	V
497	IRAK2	TKL:IRAK:	3656								C	V
498	IRAK3	TKL:IRAK:	11213								N	C
499	IRAK4	TKL:IRAK:	51135								C	PM	V
500	LIMK1	TKL:LISK:LIMK	3984								PM	C
501	LIMK2	TKL:LISK:LIMK	3985	CS
502	TESK1	TKL:LISK:TESK	7016								C
503	TESK2	TKL:LISK:TESK	10420								N
505	LRRK2	TKL:LRRK:	120892	C	MI	ER					GL	V	PM
506	TNNI3K	TKL:MLK:HH498	51086	N	C
508	MAP3K12	TKL:MLK:LZK	7786								C	PM
509	MAP3K13	TKL:MLK:LZK	9175	PM
511	MAP3K10	TKL:MLK:MLK	4294	C
512	MAP3K11	TKL:MLK:MLK	4296	CT	CS						PM
514	MAP3K7	TKL:MLK:TAK1	6885								N	V
515	MAP3K20	TKL:MLK:ZAK	51776								C
516	KSR1	TKL:RAF:KSR	8844	ER	PM						C
520	RAF1	TKL:RAF:RAF	5894	PM	N	C	MI				GL
521	ANKK1	TKL:RIPK:	255239	N
522	RIPK1	TKL:RIPK:	8737								V	MI
523	RIPK2	TKL:RIPK:	8767	C	CS	V
524	RIPK3	TKL:RIPK:	11035	C
525	RIPK4	TKL:RIPK:	54101								C
526	ACVR1	TKL:STKR:STKR1	90	PM
527	ACVR1B	TKL:STKR:STKR1	91								PM
528	ACVR1C	TKL:STKR:STKR1	130399	PM
529	ACVRL1	TKL:STKR:STKR1	94	PM
530	BMPR1A	TKL:STKR:STKR1	657								PM
531	BMPR1B	TKL:STKR:STKR1	658	PM
532	TGFBR1	TKL:STKR:STKR1	7046	PM	V	N
533	ACVR2A	TKL:STKR:STKR2	92	PM							C
534	ACVR2B	TKL:STKR:STKR2	93								C
535	AMHR2	TKL:STKR:STKR2	269	PM							C
536	BMPR2	TKL:STKR:STKR2	659	PM							Ex S
537	TGFBR2	TKL:STKR:STKR2	7048	PM							C
538	MLKL	TKL:TKL-Unique:	197259	C	PM

## Sheet: HPA main
#	Official Symbol	Classification	Gene ID	Main 1	Main 2	Main 3	Evidence
1	AKT1	AGC:Akt:	207	N			Supported
2	AKT2	AGC:Akt:	208	N	V	C	Supported
3	AKT3	AGC:Akt:	10000	C			Supported
4	CIT	AGC:DMPK:CRIK	11113	C			Approved
5	CDC42BPA	AGC:DMPK:GEK	8476	CS			Approved
7	CDC42BPG	AGC:DMPK:GEK	55561	C			Supported
8	DMPK	AGC:DMPK:GEK	1760	C			Approved
10	ROCK2	AGC:DMPK:ROCK	9475	C			Supported
11	GRK2	AGC:GRK:BARK	156	V			Approved
12	GRK3	AGC:GRK:BARK	157	N			Approved
14	GRK4	AGC:GRK:GRK	2868	V			Supported
15	GRK5	AGC:GRK:GRK	2869	N			Supported
16	GRK6	AGC:GRK:GRK	2870	MI			Approved
18	MAST1	AGC:MAST:MAST	56527	V			Approved
19	MAST2	AGC:MAST:MAST	23139	C			Approved
20	MAST3	AGC:MAST:MAST	23031	N			Approved
21	MAST4	AGC:MAST:MAST	375449	N	C		Approved
22	MASTL	AGC:MAST:MASTL	84930	N			Enhanced
23	LATS1	AGC:NDR:LATS	9113	V			Approved
24	LATS2	AGC:NDR:LATS	26524	CT	C		Supported
25	STK38	AGC:NDR:NDR	11329	C			Approved
26	STK38L	AGC:NDR:NDR	23012	C			Approved
27	PDPK1	AGC:PDK1:	5170	V			Approved
28	PRKACA	AGC:PKA:	5566	C			Approved
29	PRKACB	AGC:PKA:	5567	C			Approved
30	PRKACG	AGC:PKA:	5568	C			Approved
31	PRKX	AGC:PKA:	5613	N			Supported
33	PRKCA	AGC:PKC:PKCa	5578	C			Enhanced
34	PRKCB	AGC:PKC:PKCa	5579	N			Supported
36	PRKCD	AGC:PKC:PKCd	5580	ER	GL		Supported
37	PRKCQ	AGC:PKC:PKCd	5588	CT			Enhanced
38	PRKCE	AGC:PKC:PKCh	5581	V			Approved
39	PRKCH	AGC:PKC:PKCh	5583	C			Approved
40	PRKCI	AGC:PKC:PKCi	5584	C			Supported
41	PRKCZ	AGC:PKC:PKCi	5590	C			Supported
42	PRKG1	AGC:PKG:	5592	V	C		Approved
44	PKN1	AGC:PKN:	5585	N			Supported
45	PKN2	AGC:PKN:	5586	N	CS		Enhanced
46	PKN3	AGC:PKN:	29941	V			Approved
47	RPS6KA4	AGC:RSK:MSK CAMK:RSKb:MSKb	8986	N			Enhanced
48	RPS6KA5	AGC:RSK:MSK CAMK:RSKb:MSKb	9252	N			Enhanced
49	RPS6KB1	AGC:RSK:RSKp70	6198	N			Supported
50	RPS6KB2	AGC:RSK:RSKp70	6199	C			Supported
51	RPS6KA1	AGC:RSK:RSKp90 CAMK:RSKb:RSKb	6195	N			Supported
52	RPS6KA2	AGC:RSK:RSKp90 CAMK:RSKb:RSKb	6196	N			Supported
53	RPS6KA3	AGC:RSK:RSKp90 CAMK:RSKb:RSKb	6197	N			Approved
54	RPS6KA6	AGC:RSK:RSKp90 CAMK:RSKb:RSKb	27330	N	MI		Supported
55	RPS6KC1	AGC:RSKL:	26750	CT			Enhanced
56	RPS6KL1	AGC:RSKL:	83694	N			Approved
57	RSKR	AGC:RSKR:	124923	V	PM		Approved
58	SGK1	AGC:SGK:	6446	N			Enhanced
59	SGK2	AGC:SGK:	10110	N			Supported
60	SGK3	AGC:SGK:	23678	V			Supported
61	STK32A	AGC:YANK:	202374	CT			Approved
62	STK32B	AGC:YANK:	55351	CS			Approved
64	COQ8A	Atypical:ABC1:ABC1-A	56997	MI			Supported
65	COQ8B	Atypical:ABC1:ABC1-A	79934	MI			Enhanced
66	ADCK1	Atypical:ABC1:ABC1-B	57143	N			Approved
67	ADCK2	Atypical:ABC1:ABC1-C	90956	CT	C		Uncertain
68	ADCK5	Atypical:ABC1:ABC1-D	203054	PM	C		Approved
69	ALPK1	Atypical:Alpha:Alpha-Unclassified	80216	CT			Approved
70	ALPK2	Atypical:Alpha:Alpha-Unclassified	115701	C			Approved
71	ALPK3	Atypical:Alpha:Alpha-Unclassified	57538	N			Approved
73	TRPM7	Atypical:Alpha:ChaK	54822	PM			Approved
74	EEF2K	Atypical:Alpha:eEF2K	29904	N			Approved
75	BAZ1A	Atypical:BAZ:	11177	ER			Uncertain
76	BAZ1B	Atypical:BAZ:	9031	N			Supported
77	ABR	Atypical:BCR:	29	C			Approved
78	BCR	Atypical:BCR:	613	N	C		Approved
79	BLVRA	Atypical:BLVRA:	644	C			Supported
80	BRD2	Atypical:BRD:	6046	N			Enhanced
81	BRD3	Atypical:BRD:	8019	N			Approved
82	BRD4	Atypical:BRD:	23476	N			Enhanced
84	CERT1	Atypical:Col4A3BP:	10087	ER			Enhanced
85	FASTK	Atypical:FAST:	10922	MI			Approved
86	STK19	Atypical:G11:	8859	N			Supported
87	GTF2F1	Atypical:GTF2F1:	2962	N			Enhanced
88	BCKDK	Atypical:PDHK:BCKDK	10295	MI			Supported
89	PDK1	Atypical:PDHK:PDHK	5163	MI	N		Supported
90	PDK2	Atypical:PDHK:PDHK	5164	MI	N		Supported
91	PDK3	Atypical:PDHK:PDHK	5165	MI			Supported
93	ATM	Atypical:PIKK:ATM	472	N	V		Enhanced
94	ATR	Atypical:PIKK:ATR	545	N			Supported
95	PRKDC	Atypical:PIKK:DNAPK	5591	N			Enhanced
96	MTOR	Atypical:PIKK:FRAP	2475	V	C		Approved
97	SMG1	Atypical:PIKK:SMG1	23049	N			Supported
98	TRRAP	Atypical:PIKK:TRRAP	8295	N			Supported
99	RIOK1	Atypical:RIO:RIO1	83732	N			Approved
100	RIOK2	Atypical:RIO:RIO2	55781	C			Approved
101	RIOK3	Atypical:RIO:RIO3	8780	PM	C		Approved
102	TAF1	Atypical:TAF1:	6872	N			Enhanced
104	TRIM24	Atypical:TIF1:	8805	N			Enhanced
105	TRIM28	Atypical:TIF1:	10155	N			Enhanced
106	TRIM33	Atypical:TIF1:	51592	V			Approved
107	TRIM66	Atypical:TIF1:	9866	N			Supported
108	CAMK1	CAMK:CAMK1:	8536	C			Approved
109	CAMK1D	CAMK:CAMK1:	57118	N	C		Approved
111	CAMK4	CAMK:CAMK1:	814	N			Supported
112	PNCK	CAMK:CAMK1:	93843	C			Approved
113	CAMK2A	CAMK:CAMK2:	815	PM			Approved
114	CAMK2B	CAMK:CAMK2:	816	PM			Supported
115	CAMK2D	CAMK:CAMK2:	817	PM			Approved
116	CAMK2G	CAMK:CAMK2:	818	PM			Approved
117	PRKAA1	CAMK:CAMKL:AMPK	5562	N			Supported
118	PRKAA2	CAMK:CAMKL:AMPK	5563	N			Supported
119	BRSK1	CAMK:CAMKL:BRSK	84446	N			Supported
120	BRSK2	CAMK:CAMKL:BRSK	9024	GL			Approved
121	CHEK1	CAMK:CAMKL:CHK1	1111	N			Supported
122	HUNK	CAMK:CAMKL:HUNK	30811	N	PM		Approved
123	STK11	CAMK:CAMKL:LKB	6794	N			Supported
125	MARK2	CAMK:CAMKL:MARK	2011	PM			Supported
127	MARK4	CAMK:CAMKL:MARK	57787	C			Supported
129	NIM1K	CAMK:CAMKL:NIM1	167359	C			Approved
130	NUAK1	CAMK:CAMKL:NuaK	9891	N			Approved
131	NUAK2	CAMK:CAMKL:NuaK	81788	N	C		Approved
132	PASK	CAMK:CAMKL:PASK	23178	C			Supported
133	SIK1	CAMK:CAMKL:QIK	150094	N			Approved
134	SIK2	CAMK:CAMKL:QIK	23235	GL			Approved
135	SIK3	CAMK:CAMKL:QIK	23387	N			Enhanced
136	SNRK	CAMK:CAMKL:SNRK	54861	V	PM		Approved
137	CAMKV	CAMK:CAMK-Unique:	79012	N			Approved
138	CASK	CAMK:CASK:	8573	N			Approved
139	DAPK1	CAMK:DAPK:DAPK	1612	CT			Approved
140	DAPK2	CAMK:DAPK:DAPK	23604	V	GL		Supported
141	DAPK3	CAMK:DAPK:DAPK	1613	N			Approved
142	STK17A	CAMK:DAPK:DRAK	9263	N			Supported
143	STK17B	CAMK:DAPK:DRAK	9262	PM	C		Uncertain
144	DCLK1	CAMK:DCAMKL:	9201	N			Approved
147	MAPKAPK2	CAMK:MAPKAPK:MK2	9261	N			Supported
148	MAPKAPK3	CAMK:MAPKAPK:MK2	7867	N			Supported
149	MAPKAPK5	CAMK:MAPKAPK:MK5	8550	N	C		Supported
150	MKNK1	CAMK:MAPKAPK:MNK	8569	N			Supported
151	MKNK2	CAMK:MAPKAPK:MNK	2872	N			Supported
152	MYLK	CAMK:MLCK:	4638	CS			Enhanced
153	MYLK2	CAMK:MLCK:	85366	ER			Supported
154	MYLK3	CAMK:MLCK:	91807	N			Approved
155	MYLK4	CAMK:MLCK:	340156	GL			Approved
158	PHKG2	CAMK:PHK:	5261	C			Supported
159	PIM1	CAMK:PIM:	5292	C			Supported
160	PIM2	CAMK:PIM:	11040	C			Approved
161	PIM3	CAMK:PIM:	415116	C			Supported
162	PRKD1	CAMK:PKD:	5587	PM			Supported
163	PRKD2	CAMK:PKD:	25865	N			Supported
164	PRKD3	CAMK:PKD:	23683	C	N		Supported
165	PSKH1	CAMK:PSK:	5681	N			Approved
166	PSKH2	CAMK:PSK:	85481	N			Approved
167	CHEK2	CAMK:RAD53:	11200	N			Supported
168	STK40	CAMK:SgK495:	83931	C			Supported
169	STK33	CAMK:STK33:	65975	N			Approved
170	TRIB1	CAMK:Trbl:	10221	PM	C		Approved
171	TRIB2	CAMK:Trbl:	28951	N	C		Approved
172	TRIB3	CAMK:Trbl:	57761	N			Supported
173	KALRN	CAMK:Trio:	8997	N	C		Approved
174	TRIO	CAMK:Trio:	7204	C			Approved
175	OBSCN	CAMK:Trio: CAMK:Trio:	84033	PM	C		Approved
176	SPEG	CAMK:Trio: CAMK:Trio:	10290	V			Approved
179	TSSK3	CAMK:TSSK:	81629	N			Approved
180	TSSK4	CAMK:TSSK:	283629	PM			Approved
182	CSNK1A1	CK1:CK1:CK1-A	1452	C			Supported
183	CSNK1A1L	CK1:CK1:CK1-A	122011	C			Uncertain
184	CSNK1D	CK1:CK1:CK1-D	1453	N			Approved
185	CSNK1E	CK1:CK1:CK1-D	1454	N	C		Approved
186	CSNK1G1	CK1:CK1:CK1-G	53944	C			Supported
187	CSNK1G2	CK1:CK1:CK1-G	1455	V			Approved
189	TTBK1	CK1:TTBK:	84630	C			Supported
190	TTBK2	CK1:TTBK:	146057	CS			Uncertain
191	VRK1	CK1:VRK:	7443	N			Supported
192	VRK2	CK1:VRK:	7444	ER			Supported
193	VRK3	CK1:VRK:	51231	N	V		Supported
194	CDK20	CMGC:CDK:CCRK	23552	N			Supported
195	CDK1	CMGC:CDK:CDC2	983	C			Supported
196	CDK10	CMGC:CDK:CDK10	8558	N			Uncertain
197	CDK11A	CMGC:CDK:CDK11	728642	N			Supported
198	CDK11B	CMGC:CDK:CDK11	984	N			Approved
199	CDK2	CMGC:CDK:CDK2	1017	N			Enhanced
200	CDK3	CMGC:CDK:CDK2	1018	C			Approved
201	CDK4	CMGC:CDK:CDK4	1019	C			Supported
202	CDK6	CMGC:CDK:CDK4	1021	N			Supported
203	CDK5	CMGC:CDK:CDK5	1020	PM			Supported
205	CDK19	CMGC:CDK:CDK8	23097	N	V		Approved
206	CDK8	CMGC:CDK:CDK8	1024	N			Approved
207	CDK9	CMGC:CDK:CDK9	1025	N			Approved
208	CDK12	CMGC:CDK:CRK7	51755	N			Enhanced
209	CDK13	CMGC:CDK:CRK7	8621	N			Supported
210	CDK16	CMGC:CDK:PCTAIRE	5127	PM	CS	C	Uncertain
211	CDK17	CMGC:CDK:PCTAIRE	5128	N	C		Approved
212	CDK18	CMGC:CDK:PCTAIRE	5129	CS			Approved
213	CDK14	CMGC:CDK:PFTAIRE	5218	N	C		Supported
214	CDK15	CMGC:CDK:PFTAIRE	65061	N			Approved
215	CDKL1	CMGC:CDKL:	8814	N	V		Enhanced
216	CDKL2	CMGC:CDKL:	8999	N	CT		Supported
217	CDKL3	CMGC:CDKL:	51265	N	V		Uncertain
219	CDKL5	CMGC:CDKL:	6792	N			Supported
220	CSNK2A1	CMGC:CK2:	1457	N			Supported
222	CLK1	CMGC:CLK:	1195	N			Supported
223	CLK2	CMGC:CLK:	1196	N			Supported
224	CLK3	CMGC:CLK:	1198	N	CS		Supported
225	CLK4	CMGC:CLK:	57396	CS			Approved
226	DYRK1A	CMGC:DYRK:DYRK1	1859	C			Approved
227	DYRK1B	CMGC:DYRK:DYRK1	9149	N			Supported
228	DYRK2	CMGC:DYRK:DYRK2	8445	N			Supported
229	DYRK3	CMGC:DYRK:DYRK2	8444	N			Supported
230	DYRK4	CMGC:DYRK:DYRK2	8798	V			Enhanced
231	HIPK1	CMGC:DYRK:HIPK	204851	N	CT	GL	Approved
232	HIPK2	CMGC:DYRK:HIPK	15258	N			Supported
233	HIPK3	CMGC:DYRK:HIPK	10114	C			Supported
235	PRPF4B	CMGC:DYRK:PRP4	8899	N			Supported
236	GSK3A	CMGC:GSK:	2931	C			Approved
237	GSK3B	CMGC:GSK:	2932	N			Supported
239	MAPK3	CMGC:MAPK:ERK1	5595	N			Approved
240	MAPK4	CMGC:MAPK:ERK3	5596	N	GL		Approved
241	MAPK6	CMGC:MAPK:ERK3	5597	C			Enhanced
242	MAPK7	CMGC:MAPK:ERK5	5598	N			Enhanced
243	MAPK15	CMGC:MAPK:ERK7	332110	N	C		Approved
247	NLK	CMGC:MAPK:nmo	51701	N			Supported
248	MAPK11	CMGC:MAPK:p38	5600	MI			Approved
249	MAPK12	CMGC:MAPK:p38	6300	N			Approved
250	MAPK13	CMGC:MAPK:p38	5603	N			Approved
251	MAPK14	CMGC:MAPK:p38	1432	N			Supported
252	CILK1	CMGC:RCK:MAK	22858	N			Supported
254	MOK	CMGC:RCK:MOK	5891	ER			Supported
255	SRPK1	CMGC:SRPK:	6732	N	C		Supported
256	SRPK2	CMGC:SRPK:	6733	N	C		Supported
258	NME1	NDK:NDK:	4830	C			Enhanced
259	NME2	NDK:NDK:	4831	C			Supported
260	NME3	NDK:NDK:	4832	N			Approved
261	NME4	NDK:NDK:	4833	MI			Supported
262	NME5	NDK:NDK:	8382	N			Approved
263	NME6	NDK:NDK:	10201	V			Approved
264	NME7	NDK:NDK:	29922	MI			Approved
267	AURKA	Other:Aur:	6790	N	CT	C	Approved
268	AURKB	Other:Aur:	9212	N			Supported
270	BUB1	Other:BUB:	699	N			Supported
271	BUB1B	Other:BUB:	701	C			Supported
273	CAMKK1	Other:CAMKK:CAMKK-Meta	84254	C			Supported
274	CAMKK2	Other:CAMKK:CAMKK-Meta	10645	C			Supported
275	CDC7	Other:CDC7:	8317	N			Supported
276	DSTYK	Other:Dusty:	25778	N	CS		Uncertain
277	HASPIN	Other:Haspin:	83903	N			Supported
278	CHUK	Other:IKK:	1147	N			Supported
279	IKBKB	Other:IKK:	3551	C			Approved
280	IKBKE	Other:IKK:	9641	C			Supported
281	TBK1	Other:IKK:	29110	N			Enhanced
284	UHMK1	Other:KIS:	127933	N	GL		Supported
286	AAK1	Other:NAK:BIKE	22848	PM			Supported
287	BMP2K	Other:NAK:BIKE	55589	N			Supported
288	GAK	Other:NAK:GAK	2580	GL			Supported
289	STK16	Other:NAK:MPSK	8576	C			Approved
290	NEK1	Other:NEK:NEK1	4750	C			Supported
291	NEK3	Other:NEK:NEK1	4752	CS			Approved
293	NEK10	Other:NEK:NEK10	152110	V			Approved
294	NEK11	Other:NEK:NEK11	79858	N			Supported
295	NEK2	Other:NEK:NEK2	4751	N	CT		Supported
296	NEK4	Other:NEK:NEK4	23955	C			Supported
297	NEK6	Other:NEK:NEK6	10783	N	CT	C	Supported
298	NEK7	Other:NEK:NEK6	140609	N			Supported
300	NEK9	Other:NEK:NEK9	91754	MI			Approved
303	SBK3	Other:NKF1:	100130827	MI			Approved
307	PDIK1L	Other:NKF4:	149420	N			Supported
308	STK35	Other:NKF4:	140901	N			Supported
309	TEX14	Other:NKF5:	56155	PM	C		Approved
310	NRBP1	Other:NRBP:	29959	C			Supported
311	NRBP2	Other:NRBP:	223649	C			Approved
312	RNASEL	Other:Other-Unique:	6041	C			Supported
313	POMK	Other:Other-Unique:	84197	N			Approved
316	EIF2AK4	Other:PEK:GCN2 STE:STE-Unique:	27103	C			Approved
317	EIF2AK1	Other:PEK:HRI	27102	N			Supported
319	EIF2AK2	Other:PEK:PKR	5610	C			Enhanced
321	PLK2	Other:PLK:PLK2	10769	N	MI	C	Approved
323	PLK4	Other:PLK:SAK	10733	CT	C		Supported
324	SCYL1	Other:SCY1:	57410	C			Supported
326	SCYL3	Other:SCY1:	57147	CS			Uncertain
329	PXK	Other:Slob:	54899	PM	C		Supported
330	TBCK	Other:TBCK:	93627	N			Approved
331	TLK1	Other:TLK:	9874	N			Supported
333	PBK	Other:TOPK:	55872	C			Approved
334	TTK	Other:TTK:	7272	N	C		Approved
335	STK36	Other:ULK:Fused	27148	C			Supported
336	ULK1	Other:ULK:ULK	8408	C			Approved
339	ULK4	Other:ULK:ULK	54986	N	MI	C	Approved
340	PIK3R4	Other:VPS15:	30849	V			Approved
341	PKMYT1	Other:WEE:Myt1	9088	GL			Supported
343	WEE1	Other:WEE:WEE1	7465	N			Approved
344	WNK1	Other:WNK:	65125	C			Supported
345	WNK2	Other:WNK:	65268	C			Approved
346	WNK3	Other:WNK:	65267	V			Approved
348	FAM198A	PKL:FJ:	729085	V			Supported
349	FAM198B	PKL:FJ:	51313	N	GL		Approved
351	FAM20B	PKL:FJ:	9917	GL			Supported
352	FAM20C	PKL:FJ:	56975	GL			Approved
353	FJX1	PKL:FJ:	24147	V			Approved
354	GUCY2C	RGC:RGC:	2984	V			Uncertain
357	NPR1	RGC:RGC:	4881	N			Approved
359	MAP3K15	STE:STE11:ASK	389840	V			Approved
360	MAP3K5	STE:STE11:ASK	4217	C			Supported
361	MAP3K6	STE:STE11:ASK	9064	N			Approved
362	MAP3K1	STE:STE11:MEKK1	4214	C			Approved
363	YSK4	STE:STE11:MEKK15	80122	C			Uncertain
364	MAP3K2	STE:STE11:MEKK2	10746	N	C		Supported
365	MAP3K3	STE:STE11:MEKK2	4215	N			Approved
366	MAP3K4	STE:STE11:MEKK4	4216	C			Approved
367	OXSR1	STE:STE20:FRAY	9943	C			Enhanced
368	STK39	STE:STE20:FRAY	27347	N			Supported
369	MAP4K1	STE:STE20:KHS	11184	N	PM		Uncertain
370	MAP4K2	STE:STE20:KHS	5871	V			Approved
371	MAP4K3	STE:STE20:KHS	8491	CT			Approved
372	MAP4K5	STE:STE20:KHS	11183	PM	C		Approved
375	NRK	STE:STE20:MSN	203447	N	C		Approved
376	TNIK	STE:STE20:MSN	23043	N			Supported
377	STK3	STE:STE20:MST	6788	CS			Approved
378	STK4	STE:STE20:MST	58231	N			Supported
379	MYO3A	STE:STE20:NinaC	53904	CS	C		Supported
381	PAK1	STE:STE20:PAKA	5058	PM	C		Supported
382	PAK2	STE:STE20:PAKA	5062	N	V		Approved
383	PAK3	STE:STE20:PAKA	5063	C			Approved
384	PAK4	STE:STE20:PAKB	10298	PM			Supported
385	PAK6	STE:STE20:PAKB	56924	N			Supported
386	PAK5	STE:STE20:PAKB	57144	N			Approved
387	SLK	STE:STE20:SLK	9748	PM	C		Approved
388	STK10	STE:STE20:SLK	6793	N	PM		Approved
389	STRADA	STE:STE20:STLK	92335	N	C		Supported
390	STRADB	STE:STE20:STLK	55437	C			Supported
391	TAOK1	STE:STE20:TAO	57551	V			Approved
392	TAOK2	STE:STE20:TAO	9344	N	C		Supported
393	TAOK3	STE:STE20:TAO	51347	MI			Uncertain
394	STK26	STE:STE20:YSK	51765	GL	CT	C	Supported
395	STK24	STE:STE20:YSK	8428	N	C		Supported
397	MAP2K1	STE:STE7:MEK1	5604	PM	C		Enhanced
398	MAP2K2	STE:STE7:MEK1	5605	C			Supported
399	MAP2K3	STE:STE7:MEK3	5606	N	C		Supported
400	MAP2K6	STE:STE7:MEK3	5608	N	C		Supported
401	MAP2K4	STE:STE7:MEK4	6416	N			Approved
402	MAP2K5	STE:STE7:MEK5	5607	N	CS		Approved
403	MAP2K7	STE:STE7:MEK7	5609	PM	C		Approved
404	MAP3K14	STE:STE-Unique:	9020	V	C		Approved
405	MAP3K8	STE:STE-Unique:	1326	C			Supported
406	ABL1	TK:Abl:	25	N			Enhanced
407	ABL2	TK:Abl:	27	N			Supported
408	TNK1	TK:Ack:	8711	PM			Approved
409	TNK2	TK:Ack:	10188	C			Approved
410	ALK	TK:ALK:	238	PM			Supported
411	LTK	TK:ALK:	4058	V			Approved
412	AXL	TK:Axl:	558	PM			Supported
413	MERTK	TK:Axl:	10461	ER	N	C	Approved
416	CSK	TK:Csk:	1445	V	C		Approved
417	MATK	TK:Csk:	4145	CS			Approved
418	DDR1	TK:DDR:	780	N	PM		Approved
419	DDR2	TK:DDR:	4921	PM	CS		Approved
420	EGFR	TK:EGFR:	1956	PM			Enhanced
421	ERBB2	TK:EGFR:	2064	PM			Supported
422	ERBB3	TK:EGFR:	2065	CS			Approved
426	EPHA2	TK:Eph:	1969	PM			Supported
427	EPHA3	TK:Eph:	2042	C	N	PM	Supported
430	EPHA6	TK:Eph:	13840	N			Enhanced
433	EPHB1	TK:Eph:	2047	ER	PM	C	Supported
434	EPHB2	TK:Eph:	2048	PM			Supported
437	EPHB6	TK:Eph:	2051	N			Approved
438	PTK2	TK:FAK:	5747	PM			Supported
439	PTK2B	TK:FAK:	2185	PM	C		Supported
440	FER	TK:Fer:	2241	C			Supported
441	FES	TK:Fer:	2242	N	C		Approved
443	FGFR2	TK:FGFR:	2263	PM			Supported
444	FGFR3	TK:FGFR:	2261	ER			Supported
446	IGF1R	TK:InsR:	3480	V			Approved
447	INSR	TK:InsR:	3643	V			Approved
450	JAK2	TK:Jak: TK:JakB:	3717	N			Supported
451	JAK3	TK:Jak: TK:JakB:	3718	PM	C		Approved
452	TYK2	TK:Jak: TK:JakB:	7297	C			Approved
453	AATK	TK:Lmr:	9625	MI			Uncertain
454	LMTK2	TK:Lmr:	22853	N	CT		Approved
455	LMTK3	TK:Lmr:	114783	N			Approved
456	MET	TK:Met:	4233	PM	C		Supported
457	MST1R	TK:Met:	4486	C			Approved
459	CSF1R	TK:PDGFR:	1436	PM	V		Supported
460	FLT3	TK:PDGFR:	2322	ER			Approved
461	KIT	TK:PDGFR:	3815	PM			Supported
462	PDGFRA	TK:PDGFR:	5156	PM	N		Supported
463	PDGFRB	TK:PDGFR:	5159	V			Supported
464	RET	TK:Ret:	5979	GL	C		Approved
465	ROR1	TK:Ror:	4919	CS			Approved
467	RYK	TK:Ryk:	6259	GL			Approved
468	ROS1	TK:Sev:	6098	V			Approved
469	FRK	TK:Src:Frk	2444	N			Supported
470	FGR	TK:Src:SrcA	2268	PM			Approved
471	FYN	TK:Src:SrcA	2534	PM			Enhanced
472	SRC	TK:Src:SrcA	6714	PM			Supported
473	YES1	TK:Src:SrcA	7525	PM	C		Supported
474	BLK	TK:Src:SrcB	640	N			Approved
475	HCK	TK:Src:SrcB	3055	PM			Approved
476	LCK	TK:Src:SrcB	3932	GL			Approved
477	LYN	TK:Src:SrcB	4067	GL	PM		Supported
478	PTK6	TK:Src:SRM	5753	N	PM	C	Supported
479	SRMS	TK:Src:SRM	6725	CS			Approved
480	SYK	TK:Syk:	6850	PM	C		Approved
482	BMX	TK:Tec:	660	PM			Supported
483	BTK	TK:Tec:	695	PM	C		Supported
485	TEC	TK:Tec:	7006	PM			Supported
486	TXK	TK:Tec:	7294	V			Approved
487	TEK	TK:Tie:	7010	PM			Supported
489	STYK1	TK:TK-Unique:	55359	PM			Approved
490	NTRK1	TK:Trk:	4914	V	C		Supported
491	NTRK2	TK:Trk:	4915	C			Approved
492	NTRK3	TK:Trk:	4916	N			Supported
493	FLT1	TK:VEGFR:	2321	PM	CS		Supported
494	FLT4	TK:VEGFR:	2324	PM			Approved
495	KDR	TK:VEGFR:	3791	PM			Supported
496	IRAK1	TKL:IRAK:	3654	N			Supported
497	IRAK2	TKL:IRAK:	3656	V			Approved
498	IRAK3	TKL:IRAK:	11213	V			Approved
499	IRAK4	TKL:IRAK:	51135	CS			Approved
500	LIMK1	TKL:LISK:LIMK	3984	N	C		Supported
501	LIMK2	TKL:LISK:LIMK	3985	N	C		Supported
503	TESK2	TKL:LISK:TESK	10420	N			Enhanced
504	LRRK1	TKL:LRRK:	79705	C	MI		Supported
505	LRRK2	TKL:LRRK:	120892	N	V		Approved
507	ILK	TKL:MLK:ILK	3611	PM			Supported
508	MAP3K12	TKL:MLK:LZK	7786	N	PM		Approved
509	MAP3K13	TKL:MLK:LZK	9175	CT			Approved
510	MAP3K21	TKL:MLK:MLK	84451	PM	C		Approved
511	MAP3K10	TKL:MLK:MLK	4294	N	CS	C	Approved
512	MAP3K11	TKL:MLK:MLK	4296	CT	C		Supported
513	MAP3K9	TKL:MLK:MLK	4293	N			Approved
514	MAP3K7	TKL:MLK:TAK1	6885	C			Supported
515	MAP3K20	TKL:MLK:ZAK	51776	C			Supported
518	ARAF	TKL:RAF:RAF	369	N			Approved
519	BRAF	TKL:RAF:RAF	673	V			Approved
520	RAF1	TKL:RAF:RAF	5894	N			Supported
522	RIPK1	TKL:RIPK:	8737	C	PM		Enhanced
523	RIPK2	TKL:RIPK:	8767	C			Enhanced
526	ACVR1	TKL:STKR:STKR1	90	N			Approved
527	ACVR1B	TKL:STKR:STKR1	91	C			Approved
530	BMPR1A	TKL:STKR:STKR1	657	C			Approved
532	TGFBR1	TKL:STKR:STKR1	7046	PM			Supported
533	ACVR2A	TKL:STKR:STKR2	92	C			Approved
534	ACVR2B	TKL:STKR:STKR2	93	N	C		Approved
535	AMHR2	TKL:STKR:STKR2	269	V			Supported
536	BMPR2	TKL:STKR:STKR2	659	PM			Supported
537	TGFBR2	TKL:STKR:STKR2	7048	PM			Supported

## Sheet: 6 absent from KA COMP HPA
#	Official Symbol	Classification	Gene ID
32	PRKY	AGC:PKA:	5616
218	CDKL4	CMGC:CDKL:	344387
265	NME9	NDK:NDK:	347736
342	WEE2-AS1	Other:WEE:WEE1	285962
355	GUCY2D	RGC:RGC:	3000
488	TIE1	TK:Tie:	7075

## Sheet: 18 unique in KA
#	Position	Official Symbol	Classification	Gene ID	Vector	Tag position	KA specific localization	Note
13	1B1	GRK1	AGC:GRK:GRK	6011	pXN-HA-Flag	N	PM	Reported
17	1B5	GRK7	AGC:GRK:GRK	131890	pLX304/CMV/Flag	C	C	Reported
63	1F3	STK32C	AGC:YANK:	57740	pXN-HA-Flag	N	C	New
110	2B2	CAMK1G	CAMK:CAMK1:	57172	pcDNA-C-Flag	C	PM	Reported
146	2E2	DCLK3	CAMK:DCAMKL:	85443	pXN-HA-Flag	N	C	Reported
177	2G9	TSSK1B	CAMK:TSSK:	83942	pXN-HA-Flag	N	C	New
234	3D6	HIPK4	CMGC:DYRK:HIPK	147746	pXN-HA-Flag	N	C	Reported
257	3F5	SRPK3	CMGC:SRPK:	26576	pLX304/CMV/Flag	C	C	New
266	3G2	NME8	NDK:NDK:	51314	pLX304/CMV/Flag	C	C	New
283	3H7	ERN2	Other:IRE:	10595	pXC-Flag	C	V	Reported
292	4A4	NEK5	Other:NEK:NEK1	341676	pXN-HA-Flag	N	N	Reported
299	4A11	NEK8	Other:NEK:NEK8	284086	pcDNA-C-Flag	C	C	Reported
301	4B1	SBK1	Other:NKF1:	388228	pXN-HA-Flag	N	C	Reported
302	4B2	SBK2	Other:NKF1:	646643	pXN-HA-Flag	N	C	New
314	4C2	STK31	Other:Other-Unique:	56164	pXN-HA-Flag	N	C	Reported
327	4D3	STKLD1	Other:SgK071:	169436	pXN-HA-Flag	N	C	New
380	4H8	MYO3B	STE:STE20:NinaC	329421	pXN-HA-Flag	N	C	Reported
517	6D1	KSR2	TKL:RAF:KSR	283455	pcDNA3-C-Flag	C	PM	Reported
