# Supplementary material for: A subcellular map of the human kinome
Source: eLife. 2021 May 14;10:e64943. doi: 10.7554/eLife.64943 (PMC8175086; doi:10.7554/eLife.64943)
Supplement: Supplementary file 4. [file elife-64943-supp4.xlsx]

## Sheet: KA-COMP matched
#	position	Official Symbol	Classification	Gene ID	Vector	Tag position	KA specific localization	COMPARTMENTS
								5 STAR 1	5 STAR 2	5 STAR 3	5 STAR 4	5 STAR 5	5 STAR 6	5 STAR 7	4 STAR 1	4 STAR 2	4 STAR 3	4 STAR 4
1	1A1	AKT1	AGC:Akt:	207	pLX304/CMV/Flag	C	PM	N	C	PM	V
2	1A2	AKT2	AGC:Akt:	208	pXN-HA-Flag	N	PM	N							C	PM
5	1A5	CDC42BPA	AGC:DMPK:GEK	8476	pcDNA-C-Myc	C	PM	CS							PM	Ex S
6	1A6	CDC42BPB	AGC:DMPK:GEK	9578	pcDNA-C-Myc	C	PM	CS							PM	Ex S
8	1A8	DMPK	AGC:DMPK:GEK	1760	pXN-HA-Flag	N	C	MI							C	PM	ER
9	1A9	ROCK1	AGC:DMPK:ROCK	6093	pCAG-Myc	N	PM								PM	C	Ex S
11	1A11	GRK2	AGC:GRK:BARK	156	pLX304/CMV/Flag	C	C								C	PM
12	1A12	GRK3	AGC:GRK:BARK	157	pXN-HA-Flag	N	C								C	PM
14	1B2	GRK4	AGC:GRK:GRK	2868	pXN-HA-Flag	N	C	C	PM
16	1B4	GRK6	AGC:GRK:GRK	2870	pcDNA-C-Flag	C	PM	PM
22	1B10	MASTL	AGC:MAST:MASTL	84930	pXN-HA-Flag	N	N	N	CT	CS
23	1B11	LATS1	AGC:NDR:LATS	9113	pcDNA3-HA-Lats1	N	C	C	CS
25	1C1	STK38	AGC:NDR:NDR	11329	pLX304/CMV/Flag	C	C	N	C
27	1C3	PDPK1	AGC:PDK1:	5170	pLX304/CMV/Flag	C	C	N	C	PM
30	1C6	PRKACG	AGC:PKA:	5568	pXN-HA-Flag	N	C								N	C	PM
31	1C7	PRKX	AGC:PKA:	5613	pXN-HA-Flag	N	C	N	C
33	1C9	PRKCA	AGC:PKC:PKCa	5578	pLX304/CMV/Flag	C	C	C	PM						MI	N	ER	Ex S
34	1C10	PRKCB	AGC:PKC:PKCa	5579	pLX304/CMV/Flag	C	C	N	C	PM					Ex S
35	1C11	PRKCG	AGC:PKC:PKCa	5582	pHACE-PKCγ-HA	C	PM	C	PM
36	1C12	PRKCD	AGC:PKC:PKCd	5580	pXN-HA-Flag	N	C	C	PM	N	ER				Ex S
37	1D1	PRKCQ	AGC:PKC:PKCd	5588	pXN-HA-Flag	N	PM	C	PM
40	1D4	PRKCI	AGC:PKC:PKCi	5584	pXN-HA-Flag	N	PM	C	N						PM	Ex S
42	1D6	PRKG1	AGC:PKG:	5592	pXN-HA-Flag	N	C	C	PM
44	1D8	PKN1	AGC:PKN:	5585	pXN-HA-Flag	N	C	CS	C	V	N
45	1D9	PKN2	AGC:PKN:	5586	pXN-HA-Flag	N	C	N	C	PM	CS
47	1D11	RPS6KA4	AGC:RSK:MSK CAMK:RSKb:MSKb	8986	pRK7-HA-MSK2	N	N	N
48	1D12	RPS6KA5	AGC:RSK:MSK CAMK:RSKb:MSKb	9252	pLX304/CMV/Flag	C	C	N	C
53	1E5	RPS6KA3	AGC:RSK:RSKp90 CAMK:RSKb:RSKb	6197	pLX304/CMV/Flag	C	C								N	C
58	1E10	SGK1	AGC:SGK:	6446	N-HA-S422D	N	C	ER	N	PM	C	MI
59	1E11	SGK2	AGC:SGK:	10110	pLX304/CMV/Flag	C	C	C
60	1E12	SGK3	AGC:SGK:	23678	pXN-HA-Flag	N	V	V							C
64	1F4	ADCK3	Atypical:ABC1:ABC1-A	56997	pcDNA-C-Flag	C	MI	MI
65	1F5	ADCK4	Atypical:ABC1:ABC1-A	79934	pcDNA-C-Flag	C	MI	MI
74	1G2	EEF2K	Atypical:Alpha:eEF2K	29904	pLX304/CMV/Flag	C	C								C
77	1G5	ABR	Atypical:BCR:	29	pXN-HA-Flag	N	PM								C	PM
78	1G6	BCR	Atypical:BCR:	613	pXN-HA-Flag	N	C								PM	C	Ex S
82	1G10	BRD4	Atypical:BRD:	23476	pCMV-Flag-BRD4	N	N	N
83	1G11	BRDT	Atypical:BRD:	676	pXN-HA-Flag	N	N								N
86	1H2	STK19	Atypical:G11:	8859	pXN-HA-Flag	N	N	N
87	1H3	GTF2F1	Atypical:GTF2F1:	2962	pXN-HA-Flag	N	N	N
88	1H4	BCKDK	Atypical:PDHK:BCKDK	10295	pLX304/CMV/Flag	C	MI	MI
90	1H6	PDK2	Atypical:PDHK:PDHK	5164	pcDNA-C-Myc	C	MI	MI
91	1H7	PDK3	Atypical:PDHK:PDHK	5165	pLX304/CMV/Flag	C	MI	MI
92	1H8	PDK4	Atypical:PDHK:PDHK	5166	pXC-Flag	C	MI	MI
94	1H10	ATR	Atypical:PIKK:ATR	545	pXN-HA-Flag	N	N	N
96	1H12	MTOR	Atypical:PIKK:FRAP	2475	pRK5-Myc	N	C	V	C						N
99	2A3	RIOK1	Atypical:RIO:RIO1	83732	pLX304/CMV/Flag	C	N	C							N
100	2A4	RIOK2	Atypical:RIO:RIO2	55781	pXN-HA-Flag	N	C								N	C
101	2A5	RIOK3	Atypical:RIO:RIO3	8780	pLX304/CMV/Flag	C	C	C
104	2A8	TRIM24	Atypical:TIF1:	8805	pXN-HA-Flag	N	N	N							C
108	2A12	CAMK1	CAMK:CAMK1:	8536	pLX304/CMV/Flag	C	C								C
109	2B1	CAMK1D	CAMK:CAMK1:	57118	pLX304/CMV/Flag	C	C	N	C
113	2B5	CAMK2A	CAMK:CAMK2:	815	pLX304/CMV/Flag	C	C	PM							N	C	V
114	2B6	CAMK2B	CAMK:CAMK2:	816	pLX304/CMV/Flag	C	C								C	N	V
115	2B7	CAMK2D	CAMK:CAMK2:	817	pLX304/CMV/Flag	C	C								PM	V	N	C
116	2B8	CAMK2G	CAMK:CAMK2:	818	pXN-HA-Flag	N	N								N	V	C
117	2B9	PRKAA1	CAMK:CAMKL:AMPK	5562	pcDNA3-HA	N	N								N	C
118	2B10	PRKAA2	CAMK:CAMKL:AMPK	5563	pLX304/CMV/Flag	C	N								N	C
121	2C1	CHEK1	CAMK:CAMKL:CHK1	1111	pXN-HA-Flag	N	N	C	CT	N					Ex S
123	2C3	STK11	CAMK:CAMKL:LKB	6794	pLX304/CMV/Flag	C	N	N	C	MI					PM
125	2C5	MARK2	CAMK:CAMKL:MARK	2011	pXN-HA-Flag	N	PM	C	CS	PM					MI
126	2C6	MARK3	CAMK:CAMKL:MARK	4140	MARK3-HA	C	PM	C	PM						Ex S
127	2C7	MARK4	CAMK:CAMKL:MARK	57787	pRK7-N-Flag-WT	N	C	C	CT	CS
132	2C12	PASK	CAMK:CAMKL:PASK	23178	Myc-PASK	N	C	N	C
138	2D6	CASK	CAMK:CASK:	8573	pLX304/CMV/Flag	C	C								N	C	PM	CS
139	2D7	DAPK1	CAMK:DAPK:DAPK	1612	pLX304/CMV/Flag	C	C	C	CS	PM
140	2D8	DAPK2	CAMK:DAPK:DAPK	23604	pLX304/CMV/Flag	C	C	C
142	2D10	STK17A	CAMK:DAPK:DRAK	9263	pXN-HA-Flag	N	N	N
143	2D11	STK17B	CAMK:DAPK:DRAK	9262	pXN-HA-Flag	N	N	N
145	2E1	DCLK2	CAMK:DCAMKL:	166614	pXC-Flag	C	CS	CS
147	2E3	MAPKAPK2	CAMK:MAPKAPK:MK2	9261	pXN-HA-Flag	N	C	N	C						Ex S
149	2E5	MAPKAPK5	CAMK:MAPKAPK:MK5	8550	pXN-HA-Flag	N	N	N	C
150	2E6	MKNK1	CAMK:MAPKAPK:MNK	8569	pLX304/CMV/Flag	C	C	N	C
151	2E7	MKNK2	CAMK:MAPKAPK:MNK	2872	pXN-HA-Flag	N	C	C	N
154	2E10	MYLK3	CAMK:MLCK:	91807	pLX304/CMV/Flag	C	C	C
157	2F1	PHKG1	CAMK:PHK:	5260	pXN-HA-Flag	N	C	C
159	2F3	PIM1	CAMK:PIM:	5292	pXN-HA-Flag	N	N	PM	N	C
163	2F7	PRKD2	CAMK:PKD:	25865	pLX304/CMV/Flag	C	C								N	C
165	2F9	PSKH1	CAMK:PSK:	5681	pcDNA-C-Flag	C	N	GL	C	ER	N	CT	PM
167	2F11	CHEK2	CAMK:RAD53:	11200	pXN-HA-Flag	N	N	N
170	2G2	TRIB1	CAMK:Trbl:	10221	pXN-HA-Flag	N	N								N	C
172	2G4	TRIB3	CAMK:Trbl:	57761	pXN-HA-Flag	N	N								N	C	PM
178	2G10	TSSK2	CAMK:TSSK:	23617	pXN-HA-Flag	N	C								N	C
183	2H3	CSNK1A1L	CK1:CK1:CK1-A	122011	pXN-HA-Flag	N	C								C
184	2H4	CSNK1D	CK1:CK1:CK1-D	1453	pcDNA-C-Flag	C	C	C	CS	PM	CT				N	ER	GL
185	2H5	CSNK1E	CK1:CK1:CK1-D	1454	pLX304/CMV/Flag	C	C								N	C
191	2H11	VRK1	CK1:VRK:	7443	pLX304/CMV/Flag	C	N	N	GL
192	2H12	VRK2	CK1:VRK:	7444	pXN-HA-Flag	N	ER	MI	N	C	ER
193	3A1	VRK3	CK1:VRK:	51231	pXN-HA-Flag	N	N								N
195	3A3	CDK1	CMGC:CDK:CDC2	983	pLX304/CMV/Flag	C	C	MI	CT	CS					ER	N	C	Ex S
201	3A9	CDK4	CMGC:CDK:CDK4	1019	pLX304/CMV/Flag	C	C	N	C
202	3A10	CDK6	CMGC:CDK:CDK4	1021	pLX304/CMV/Flag	C	C	CT							N	C
203	3A11	CDK5	CMGC:CDK:CDK5	1020	pLX304/CMV/Flag	C	C	N							PM	C
204	3A12	CDK7	CMGC:CDK:CDK7	1022	pXN-HA-Flag	N	N	C	N
206	3B2	CDK8	CMGC:CDK:CDK8	1024	pXN-HA-Flag	N	N	N
207	3B3	CDK9	CMGC:CDK:CDK9	1025	pLX304/CMV/Flag	C	N	C	N
208	3B4	CDK12	CMGC:CDK:CRK7	51755	pXN-HA-Flag	N	N	N
209	3B5	CDK13	CMGC:CDK:CRK7	8621	pXN-HA-Flag	N	N	N							Ex S
210	3B6	CDK16	CMGC:CDK:PCTAIRE	5127	pLX304/CMV/Flag	C	C	C	PM
213	3B9	CDK14	CMGC:CDK:PFTAIRE	5218	pXN-HA-Flag	N	C	N	C	PM
220	3C4	CSNK2A1	CMGC:CK2:	1457	pLX304/CMV/Flag	C	N	N							PM
221	3C5	CSNK2A2	CMGC:CK2:	1459	pXN-HA-Flag	N	C	N							C
222	3C6	CLK1	CMGC:CLK:	1195	pXN-HA-Flag	N	N	N
223	3C7	CLK2	CMGC:CLK:	1196	pLX304/CMV/Flag	C	N	N
224	3C8	CLK3	CMGC:CLK:	1198	pLX304/CMV/Flag	C	N	N							PM
226	3C10	DYRK1A	CMGC:DYRK:DYRK1	1859	HA-DYRK1A	N	N	C	N
227	3C11	DYRK1B	CMGC:DYRK:DYRK1	9149	pLX304/CMV/Flag	C	N	N
228	3C12	DYRK2	CMGC:DYRK:DYRK2	8445	HA-DYRK2	N	N	N	C
229	3D1	DYRK3	CMGC:DYRK:DYRK2	8444	pXN-HA-Flag	N	C	N	C
231	3D3	HIPK1	CMGC:DYRK:HIPK	204851	pXN-HA-Flag	N	C	N	C
232	3D4	HIPK2	CMGC:DYRK:HIPK	15258	pXN-HA-Flag	N	N	N	C
235	3D7	PRPF4B	CMGC:DYRK:PRP4	8899	pXN-HA-Flag	N	N	N
237	3D9	GSK3B	CMGC:GSK:	2932	pXN-HA-Flag	N	C	N	C	CT	PM
238	3D10	MAPK1	CMGC:MAPK:ERK1	5594	pXN-HA-Flag	N	C	PM	C	CS	MI	V
239	3D11	MAPK3	CMGC:MAPK:ERK1	5595	pcDNA-C-Flag	C	C	PM	MI	V	C	CS
240	3D12	MAPK4	CMGC:MAPK:ERK3	5596	pXN-HA-Flag	N	C								N	C
241	3E1	MAPK6	CMGC:MAPK:ERK3	5597	pXN-Myc-His	N	N								N	C
242	3E2	MAPK7	CMGC:MAPK:ERK5	5598	pXN-HA-Flag	N	C	N	C
243	3E3	MAPK15	CMGC:MAPK:ERK7	332110	pXN-HA-Flag	N	C	N	C	GL	PM	Ex S
244	3E4	MAPK10	CMGC:MAPK:JNK	5602	pXN-HA-Flag	N	C								PM	N	C	MI
245	3E5	MAPK8	CMGC:MAPK:JNK	5599	pLX304/CMV/Flag	C	C								N	C
246	3E6	MAPK9	CMGC:MAPK:JNK	5601	pXN-HA-Flag	N	C								N	C
249	3E9	MAPK12	CMGC:MAPK:p38	6300	pLX304/CMV/Flag	C	C	MI	N	C
250	3E10	MAPK13	CMGC:MAPK:p38	5603	pLX304/CMV/Flag	C	C								C
251	3E11	MAPK14	CMGC:MAPK:p38	1432	pLX304/CMV/Flag	C	C								N	C	Ex S
252	3E12	CILK1	CMGC:RCK:MAK	22858	pXN-HA-Flag	N	N	N
253	3F1	MAK	CMGC:RCK:MAK	4117	pXN-HA-Flag	N	N	N	CS	CT
255	3F3	SRPK1	CMGC:SRPK:	6732	pLX304/CMV/Flag	C	C	N	C
256	3F4	SRPK2	CMGC:SRPK:	6733	pXN-HA-Flag	N	C	C	N
258	3F6	NME1	NDK:NDK:	4830	pLX304/CMV/Flag	C	C	C	N	PM					Ex S
259	3F7	NME2	NDK:NDK:	4831	pLX304/CMV/Flag	C	C	C							N	Ex S
261	3F9	NME4	NDK:NDK:	4833	pcDNA-C-Myc	C	MI								MI
263	3F11	NME6	NDK:NDK:	10201	pLX304/CMV/Flag	C	MI	MI
264	3F12	NME7	NDK:NDK:	29922	pLX304/CMV/Flag	C	C	CT							C
267	3G3	AURKA	Other:Aur:	6790	pXN-HA-Flag	N	C	CS	CT						N	C
268	3G4	AURKB	Other:Aur:	9212	pLX304/CMV/Flag	C	N	N	CS						C
271	3G7	BUB1B	Other:BUB:	701	pXN-HA-Flag	N	C	CS	CT	N					C
272	3G8	TP53RK	Other:Bud32:	112858	pLX304/CMV/Flag	C	N	N	C
273	3G9	CAMKK1	Other:CAMKK:CAMKK-Meta	84254	pLX304/CMV/Flag	C	C								N	C
275	3G11	CDC7	Other:CDC7:	8317	pXC-Flag	C	N	N							C
276	3G12	DSTYK	Other:Dusty:	25778	pLX304/CMV/Flag	C	C	C	PM
277	3H1	HASPIN	Other:Haspin:	83903	pXN-HA-Flag	N	N	N	CT	C
280	3H4	IKBKE	Other:IKK:	9641	pLX304/CMV/Flag	C	C	N	C						V
282	3H6	ERN1	Other:IRE:	2081	pXC-Flag	C	ER	ER	C
284	3H8	UHMK1	Other:KIS:	127933	pXN-HA-Flag	N	N								N
288	3H12	GAK	Other:NAK:GAK	2580	pEGFP-EGFP	N	GL								V	C	GL	PM
290	4A2	NEK1	Other:NEK:NEK1	4750	pXN-HA-Flag	N	C	C	N						CT
296	4A8	NEK4	Other:NEK:NEK4	23955	pXN-HA-Flag	N	C								C
297	4A9	NEK6	Other:NEK:NEK6	10783	pLX304/CMV/Flag	C	N	N	C	CT
300	4A12	NEK9	Other:NEK:NEK9	91754	pXN-HA-Flag	N	C								C
304	4B4	PINK1	Other:NKF2:	65018	pXN-HA-Flag	N	MI	MI	ER	C					CS	PM
311	4B11	NRBP2	Other:NRBP:	223649	pcDNA-C-Flag	C	C								C
312	4B12	RNASEL	Other:Other-Unique:	6041	pXN-HA-Flag	N	C								MI	C
318	4C6	EIF2AK3	Other:PEK:PEK	9451	pXC-Flag	C	ER	ER							C
319	4C7	EIF2AK2	Other:PEK:PKR	5610	pXN-HA-Flag	N	C	N	C
320	4C8	PLK1	Other:PLK:PLK1	5347	pXN-HA-Flag	N	C	N	CS	CT					C
321	4C9	PLK2	Other:PLK:PLK2	10769	HA-PLK2	N	C	CT							C
323	4C11	PLK4	Other:PLK:SAK	10733	pXN-HA-Flag	N	CT	CT	CS	N
324	4C12	SCYL1	Other:SCY1:	57410	pCMV-SPORT6-N-Flag	N	C	GL	ER	CT	C
325	4D1	SCYL2	Other:SCY1:	55681	pXN-HA-Flag	N	C	GL	C	V
326	4D2	SCYL3	Other:SCY1:	57147	pLX304/CMV/Flag	C	GL	C	GL	PM
328	4D4	PKDCC	Other:SgK493:	91461	pcDNA-C-Flag	C	GL	Ex S							GL
330	4D6	TBCK	Other:TBCK:	93627	pXN-HA-Flag	N	C	C	CS
331	4D7	TLK1	Other:TLK:	9874	pXC-Flag	C	N	N
332	4D8	TLK2	Other:TLK:	11011	pXN-HA-Flag	N	N	N	C	CS
333	4D9	PBK	Other:TOPK:	55872	pLX304/CMV/Flag	C	N								N
334	4D10	TTK	Other:TTK:	7272	pXN-HA-Flag	N	C	C
335	4D11	STK36	Other:ULK:Fused	27148	pXN-HA-Flag	N	C	N	C
336	4D12	ULK1	Other:ULK:ULK	8408	Flag-ULK1	N	C	C							MI	ER
337	4E1	ULK2	Other:ULK:ULK	9706	pLX304/CMV/Flag	C	C	C
338	4E2	ULK3	Other:ULK:ULK	25989	pRK7-N-Flag	N	C	C
340	4E4	PIK3R4	Other:VPS15:	30849	pXN-HA-Flag	N	C	C	V						CS
341	4E5	PKMYT1	Other:WEE:Myt1	9088	pXN-HA-Flag	N	ER								ER	GL	C	N
345	4E9	WNK2	Other:WNK:	65268	pCMV-3XFlag-WNK2	N	C	C
348	4E12	FAM198A	PKL:FJ:	729085	pXN-HA-Flag	N	GL								ER	GL	Ex S
351	4F3	FAM20B	PKL:FJ:	9917	pXN-HA-Flag	N	GL	GL
352	4F4	FAM20C	PKL:FJ:	56975	pcDNA-C-Flag	C	GL	GL	Ex S						ER
360	4F12	MAP3K5	STE:STE11:ASK	4217	pLX304/CMV/Flag	C	C	ER	C
365	4G5	MAP3K3	STE:STE11:MEKK2	4215	pCMV-3XFlag-MEKK3	N	C								C
372	4G12	MAP4K5	STE:STE20:KHS	11183	pXN-HA-Flag	N	C	C
373	4H1	MAP4K4	STE:STE20:MSN	26921	pXN-HA-Flag	N	C	C							PM
374	4H2	MINK1	STE:STE20:MSN	50488	pcDNA-C-Myc	C	C	GL	C						Ex S
376	4H4	TNIK	STE:STE20:MSN	23043	HA-TNIK-PGW1	N	C	N	C	CS	PM	V
377	4H5	STK3	STE:STE20:MST	6788	pLX304/CMV/Flag	C	C	PM							C
378	4H6	STK4	STE:STE20:MST	58231	Flag-STK4	N	C	N	C
381	4H9	PAK1	STE:STE20:PAKA	5058	pcDNA-C-Flag	C	C	PM	N	C
382	4H10	PAK2	STE:STE20:PAKA	5062	pXN-HA-Flag	N	C	C	N	PM
387	5A3	SLK	STE:STE20:SLK	9748	Flag-SLK	N	C	C							PM	Ex S
389	5A5	STRADA	STE:STE20:STLK	92335	HA-STRADA	N	N	N	C
391	5A7	TAOK1	STE:STE20:TAO	57551	pRK5-N-Myc	N	C								C	Ex S
395	5A11	STK24	STE:STE20:YSK	8428	pLX304/CMV/Flag	C	C	N	C	GL					PM	Ex S
396	5A12	STK25	STE:STE20:YSK	10494	pLX304/CMV/Flag	C	C	C							Ex S
398	5B2	MAP2K2	STE:STE7:MEK1	5605	pLX304/CMV/Flag	C	C	C	N	PM	MI	GL	V	CS
399	5B3	MAP2K3	STE:STE7:MEK3	5606	pXN-HA-Flag	N	C								N	C	PM
401	5B5	MAP2K4	STE:STE7:MEK4	6416	pXN-HA-Flag	N	C								C
403	5B7	MAP2K7	STE:STE7:MEK7	5609	pcDNA-Flag	N	C								N	C
404	5B8	MAP3K14	STE:STE-Unique:	9020	pXN-HA-Flag	N	C	C
406	5B10	ABL1	TK:Abl:	25	pLX304/CMV/Flag	C	C	C	CS	N					MI
407	5B11	ABL2	TK:Abl:	27	pXN-HA-Flag	N	CS	CS							C
408	5B12	TNK1	TK:Ack:	8711	pcDNA-C-Flag	C	C	C	PM
409	5C1	TNK2	TK:Ack:	10188	pXC-Flag	C	V	N	C	PM	V
412	5C4	AXL	TK:Axl:	558	pcDNA-C-Flag	C	PM	PM	Ex S
413	5C5	MERTK	TK:Axl:	10461	pXC-Flag	C	C	C	Ex S						PM
416	5C8	CSK	TK:Csk:	1445	pLX304/CMV/Flag	C	C								C	PM	Ex S
417	5C9	MATK	TK:Csk:	4145	pLX304/CMV/Flag	C	C								C
418	5C10	DDR1	TK:DDR:	780	pLX304/CMV/Flag	C	PM	PM							Ex S
421	5D1	ERBB2	TK:EGFR:	2064	pLX304/CMV/Flag	C	PM	N	C	PM
422	5D2	ERBB3	TK:EGFR:	2065	pLX304/CMV/Flag	C	PM	PM	Ex S
424	5D4	EPHA1	TK:Eph:	2041	pLX304/CMV/Flag	C	PM	PM
427	5D7	EPHA3	TK:Eph:	2042	pXN-HA-Flag	N	PM	PM	V
428	5D8	EPHA4	TK:Eph:	2043	pcDNA-C-Flag	C	C								C	PM	V
429	5D9	EPHA5	TK:Eph:	13839	pcDNA-C-Myc	C	PM	C	PM
433	5E1	EPHB1	TK:Eph:	2047	pLX304/CMV/Flag	C	PM	V	PM
435	5E3	EPHB3	TK:Eph:	2049	pXN-HA-Flag	N	C	PM							C	Ex S
437	5E5	EPHB6	TK:Eph:	2051	pXN-HA-Flag	N	C	PM							C
438	5E6	PTK2	TK:FAK:	5747	pLX304/CMV/Flag	C	C	CS	N	C	PM
439	5E7	PTK2B	TK:FAK:	2185	pXN-HA-Flag	N	C	PM	N	C
441	5E9	FES	TK:Fer:	2242	pLX304/CMV/Flag	C	C	C	GL	CS	PM
445	5F1	FGFR4	TK:FGFR:	2264	pXN-HA-Flag	N	PM	PM	GL	ER	V	Ex S
446	5F2	IGF1R	TK:InsR:	3480	pcDNA-C-Myc	C	PM	PM
449	5F5	JAK1	TK:Jak: TK:JakB:	3716	pXN-HA-Flag	N	PM								C	V	N	PM
451	5F7	JAK3	TK:Jak: TK:JakB:	3718	pcDNA-C-Flag	C	C								V	C	PM
452	5F8	TYK2	TK:Jak: TK:JakB:	7297	pLX304/CMV/Flag	C	N								N	C	Ex S
461	5G5	KIT	TK:PDGFR:	3815	pXN-HA-Flag	N	C	PM	C						Ex S
463	5G7	PDGFRB	TK:PDGFR:	5159	pXN-HA-Flag	N	C	PM							N	C
466	5G10	ROR2	TK:Ror:	4920	pLX304/CMV/Flag	C	PM								PM	V
467	5G11	RYK	TK:Ryk:	6259	pXN-HA-Flag	N	C	PM							C	N
471	5H3	FYN	TK:Src:SrcA	2534	pXN-HA-Flag	N	C	PM	C	N					V
472	5H4	SRC	TK:Src:SrcA	6714	pLX304/CMV/Flag	C	PM	MI	PM	C	V
473	5H5	YES1	TK:Src:SrcA	7525	pXN-HA-Flag	N	PM	GL	CT	C	PM				Ex S
476	5H8	LCK	TK:Src:SrcB	3932	pXN-HA-Flag	N	C	PM							C	Ex S
477	5H9	LYN	TK:Src:SrcB	4067	pLX304/CMV/Flag	C	PM	PM	N	GL					C	Ex S
481	6A1	ZAP70	TK:Syk:	7535	pLX304/CMV/Flag	C	C								C	PM
483	6A3	BTK	TK:Tec:	695	pLX304/CMV/Flag	C	C	N	C	PM
487	6A7	TEK	TK:Tie:	7010	pcDNA-C-Myc	C	PM	PM
491	6A11	NTRK2	TK:Trk:	4915	pEGFP-N1-TrkB	C	GL	PM							V	GL
496	6B4	IRAK1	TKL:IRAK:	3654	pcDNA-C-Myc	C	PM								PM	V
497	6B5	IRAK2	TKL:IRAK:	3656	pLX304/CMV/Flag	C	C								C	V
500	6B8	LIMK1	TKL:LISK:LIMK	3984	pLX304/CMV/Flag	C	C								PM	C
502	6B10	TESK1	TKL:LISK:TESK	7016	pcDNA-C-Flag	C	C								C
511	6C7	MAP3K10	TKL:MLK:MLK	4294	pXN-HA-Flag	N	C	C
516	6C12	KSR1	TKL:RAF:KSR	8844	pXN-HA-Flag	N	C	ER	PM						C
520	6D4	RAF1	TKL:RAF:RAF	5894	pXN-HA-Flag	N	C	PM	N	C	MI				GL
523	6D7	RIPK2	TKL:RIPK:	8767	pLX304/CMV/Flag	C	C	C	CS	V
524	6D8	RIPK3	TKL:RIPK:	11035	pXN-HA-Flag	N	C	C
527	6D11	ACVR1B	TKL:STKR:STKR1	91	pcDNA-C-Myc	C	PM								PM
528	6D12	ACVR1C	TKL:STKR:STKR1	130399	pcDNA-C-Myc	C	PM	PM
529	6E1	ACVRL1	TKL:STKR:STKR1	94	pcDNA-C-Myc	C	PM	PM
530	6E2	BMPR1A	TKL:STKR:STKR1	657	pXC-Flag	C	PM								PM
534	6E6	ACVR2B	TKL:STKR:STKR2	93	pXN-HA-Flag	N	C								C
537	6E9	TGFBR2	TKL:STKR:STKR2	7048	pXN-HA-Flag	N	C	PM							C
538	6E10	MLKL	TKL:TKL-Unique:	197259	pXN-HA-Flag	N	C	C	PM

## Sheet: KA-COMP unmatched
#	position	Official Symbol	Classification	Gene ID	Vector	Tag position	KA specific localization	COMPARTMENTS
								5 STAR 1	5 STAR 2	5 STAR 3	5 STAR 4	5 STAR 5	5 STAR 6	5 STAR 7	4 STAR 1	4 STAR 2	4 STAR 3	4 STAR 4
4	1A4	CIT	AGC:DMPK:CRIK	11113	pcDNA-C-Myc	C	V								C	PM
7	1A7	CDC42BPG	AGC:DMPK:GEK	55561	pXN-HA-Flag	N	V								PM
24	1B12	LATS2	AGC:NDR:LATS	26524	pcDNA3-HA-Lats2	N	V	N	C	CS
26	1C2	STK38L	AGC:NDR:NDR	23012	pcDNA-C-Myc	C	N	C	CS	PM
28	1C4	PRKACA	AGC:PKA:	5566	pLX304/CMV/Flag	C	GL	N	C	PM	CS
29	1C5	PRKACB	AGC:PKA:	5567	pLX304/CMV/Flag	C	C	CT							N	PM	Ex S
39	1D3	PRKCH	AGC:PKC:PKCh	5583	pLX304/CMV/Flag	C	MI	C	PM						Ex S
46	1D10	PKN3	AGC:PKN:	29941	pcDNA-C-Myc	C	PM								N	GL
52	1E4	RPS6KA2	AGC:RSK:RSKp90 CAMK:RSKb:RSKb	6196	pcDNA-C-Flag	C	PM	N	C
84	1G12	CERT1	Atypical:Col4A3BP:	10087	pLX304/CMV/Flag	C	C	GL							ER
89	1H5	PDK1	Atypical:PDHK:PDHK	5163	pLX304/CMV/Flag	C	MI	N	C	PM
102	2A6	TAF1	Atypical:TAF1:	6872	pXN-HA-Flag	N	C								N
119	2B11	BRSK1	CAMK:CAMKL:BRSK	84446	pEBG2T-GST-HA	N	PM	C	N						CT
120	2B12	BRSK2	CAMK:CAMKL:BRSK	9024	pLX304/CMV/Flag	C	PM	C	ER	CT
128	2C8	MELK	CAMK:CAMKL:MELK	9833	pEBG2T-GST-HA	N	C	PM
136	2D4	SNRK	CAMK:CAMKL:SNRK	54861	pXN-HA-Flag	N	C	N
148	2E4	MAPKAPK3	CAMK:MAPKAPK:MK2	7867	pLX304/CMV/Flag	C	N								C
162	2F6	PRKD1	CAMK:PKD:	5587	pc-DNA-C-Myc	C	PM	GL							V
171	2G3	TRIB2	CAMK:Trbl:	28951	pLX304/CMV/Flag	C	N								C
173	2G5	KALRN	CAMK:Trio:	8997	pXN-HA-Flag	N	C								CS	Ex S
176	2G8	SPEG	CAMK:Trio: CAMK:Trio:	10290	pXN-HA-Flag	N	C	N
181	2H1	TSSK6	CAMK:TSSK:	83983	pXN-HA-Flag	N	C								N
182	2H2	CSNK1A1	CK1:CK1:CK1-A	1452	pXN-HA-Flag	N	C	CT	N
186	2H6	CSNK1G1	CK1:CK1:CK1-G	53944	CSNK1G1-Myc	C	PM	C
188	2H8	CSNK1G3	CK1:CK1:CK1-G	1456	pcDNA-C-Myc	C	PM	C
199	3A7	CDK2	CMGC:CDK:CDK2	1017	pLX304/CMV/Flag	C	C	N	CT	V
236	3D8	GSK3A	CMGC:GSK:	2931	pLX304/CMV/Flag	C	C								PM
247	3E7	NLK	CMGC:MAPK:nmo	51701	pCMV-NLK-Flag	C	PM								N	C
248	3E8	MAPK11	CMGC:MAPK:p38	5600	pXN-HA-Flag	N	PM								N	C
254	3F2	MOK	CMGC:RCK:MOK	5891	pXN-HA-Flag	N	C	N
260	3F8	NME3	NDK:NDK:	4832	pcDNA-C-Myc	C	MI								C
269	3G5	AURKC	Other:Aur:	6795	pLX304/CMV/Flag	C	C	N	CS
270	3G6	BUB1	Other:BUB:	699	pXN-HA-Flag	N	C	N
274	3G10	CAMKK2	Other:CAMKK:CAMKK-Meta	10645	pcDNA3-N-Flag	N	C								N
285	3H9	MOS	Other:MOS:	4342	pXN-HA-Flag	N	N								C
291	4A3	NEK3	Other:NEK:NEK1	4752	pXN-HA-Flag	N	C	N
294	4A6	NEK11	Other:NEK:NEK11	79858	pXN-HA-Flag	N	C	N
298	4A10	NEK7	Other:NEK:NEK6	140609	pLX304/CMV/Flag	C	N								C
310	4B10	NRBP1	Other:NRBP:	29959	pcDNA-C-Flag	C	C								N
315	4C3	PAN3	Other:PAN3:	255967	pT7-EGFP-C1-HsPAN3	N	V								C
322	4C10	PLK3	Other:PLK:PLK2	1263	pcDNA-C-Myc	C	PM	CT	C	N	GL
347	4E11	WNK4	Other:WNK:	65266	pcDNA-C-Myc	C	AG								PM
349	4F1	FAM198B	PKL:FJ:	51313	pXN-HA-Flag	N	ER								GL
350	4F2	FAM20A	PKL:FJ:	54757	pcDNA-C-Myc	C	PM	Ex S							ER
356	4F8	GUCY2F	RGC:RGC:	2986	pcDNA-C-Myc	C	ER								N
358	4F10	NPR2	RGC:RGC:	4882	pcDNA-C-Flag	C	ER	PM
367	4G7	OXSR1	STE:STE20:FRAY	9943	pLX304/CMV/Flag	C	C	Ex S
370	4G10	MAP4K2	STE:STE20:KHS	5871	pcDNA-C-Myc	C	PM								GL
384	4H12	PAK4	STE:STE20:PAKB	10298	pLX304/CMV/Flag	C	C								GL	PM
385	5A1	PAK6	STE:STE20:PAKB	56924	pXN-HA-Flag	N	PM	N	C
386	5A2	PAK5	STE:STE20:PAKB	57144	pLX304/CMV/Flag	C	V	N	C	MI
388	5A4	STK10	STE:STE20:SLK	6793	pXC-Flag	C	C	PM							Ex S
397	5B1	MAP2K1	STE:STE7:MEK1	5604	pLX304/CMV/Flag	C	C	PM	N	ER	GL	V	MI
414	5C6	TYRO3	TK:Axl:	7301	pLX304/CMV/Flag	C	V	PM							N	ER
415	5C7	PTK7	TK:CCK4:	5754	pcDNA-C-Myc	C	ER	PM
423	5D3	ERBB4	TK:EGFR:	2066	pLX304/CMV/Flag	C	GL	N	MI	PM					C
425	5D5	EPHA10	TK:Eph:	284656	pcDNA-C-Myc	C	GL	PM
426	5D6	EPHA2	TK:Eph:	1969	pLX304/CMV/Flag	C	V	PM
430	5D10	EPHA6	TK:Eph:	13840	pcDNA-C-Myc	C	GL								PM
432	5D12	EPHA8	TK:Eph:	2046	pLX304/CMV/Flag	C	ER								PM
454	5F10	LMTK2	TK:Lmr:	22853	pcDNA-C-Flag	C	N	PM	GL	V	C
456	5F12	MET	TK:Met:	4233	pXN-HA-Flag	N	C	PM	Ex S
457	5G1	MST1R	TK:Met:	4486	pLX304/CMV/Flag	C	C	PM
458	5G2	MUSK	TK:Musk:	4593	pXC-Flag	C	V	PM
464	5G8	RET	TK:Ret:	5979	pcDNA-C-3XFlag	C	ER	PM	V
465	5G9	ROR1	TK:Ror:	4919	pLX304/CMV/Flag	C	ER	PM							C
468	5G12	ROS1	TK:Sev:	6098	pXN-HA-Flag	N	C	PM
469	5H1	FRK	TK:Src:Frk	2444	pLX304/CMV/Flag	C	PM	Ex S
470	5H2	FGR	TK:Src:SrcA	2268	pLX304/CMV/Flag	C	PM								C	Ex S
474	5H6	BLK	TK:Src:SrcB	640	pLX304/CMV/Flag	C	PM								C
484	6A4	ITK	TK:Tec:	3702	pXN-HA-Flag	N	PM								N	C
485	6A5	TEC	TK:Tec:	7006	pXN-HA-Flag	N	V	C	CS	PM
489	6A9	STYK1	TK:TK-Unique:	55359	pLX304/CMV/Flag	C	AG								PM
501	6B9	LIMK2	TKL:LISK:LIMK	3985	pLX304/CMV/Flag	C	C	CS
508	6C4	MAP3K12	TKL:MLK:LZK	7786	pcDNA-C-Myc	C	GL								C	PM
509	6C5	MAP3K13	TKL:MLK:LZK	9175	pcDNA-C-Myc	C	GL	PM
512	6C8	MAP3K11	TKL:MLK:MLK	4296	pcDNA-C-Myc	C	MI	CT	CS						PM
514	6C10	MAP3K7	TKL:MLK:TAK1	6885	pXC-Flag	C	C								N	V
515	6C11	MAP3K20	TKL:MLK:ZAK	51776	pLX304/CMV/Flag	C	N								C
521	6D5	ANKK1	TKL:RIPK:	255239	pXN-HA-Flag	N	C	N
522	6D6	RIPK1	TKL:RIPK:	8737	pLX304/CMV/Flag	C	C								V	MI
525	6D9	RIPK4	TKL:RIPK:	54101	pXN-HA-Flag	N	V								C
531	6E3	BMPR1B	TKL:STKR:STKR1	658	pXN-HA-Flag	N	ER	PM
533	6E5	ACVR2A	TKL:STKR:STKR2	92	pXN-HA-Flag	N	ER	PM							C
535	6E7	AMHR2	TKL:STKR:STKR2	269	pXC-Flag	C	ER	PM							C
