# Supplementary material for: A subcellular map of the human kinome
Source: eLife. 2021 May 14;10:e64943. doi: 10.7554/eLife.64943 (PMC8175086; doi:10.7554/eLife.64943)
Supplement: Supplementary file 5. [file elife-64943-supp5.xlsx]

## Sheet: KA-HPA matched
#	position	Official Symbol	Classification	Gene ID	Vector	Tag position	KA specific localization	HPA
								Main 1	Main 2	Main 3	Evidence
8	1A8	DMPK	AGC:DMPK:GEK	1760	pXN-HA-Flag	N	C	C			Approved
19	1B7	MAST2	AGC:MAST:MAST	23139	pcDNA-C-Flag	C	C	C			Approved
21	1B9	MAST4	AGC:MAST:MAST	375449	pXN-HA-Flag	N	C	N	C		Approved
22	1B10	MASTL	AGC:MAST:MASTL	84930	pXN-HA-Flag	N	N	N			Enhanced
25	1C1	STK38	AGC:NDR:NDR	11329	pLX304/CMV/Flag	C	C	C			Approved
29	1C5	PRKACB	AGC:PKA:	5567	pLX304/CMV/Flag	C	C	C			Approved
30	1C6	PRKACG	AGC:PKA:	5568	pXN-HA-Flag	N	C	C			Approved
33	1C9	PRKCA	AGC:PKC:PKCa	5578	pLX304/CMV/Flag	C	C	C			Enhanced
42	1D6	PRKG1	AGC:PKG:	5592	pXN-HA-Flag	N	C	V	C		Approved
47	1D11	RPS6KA4	AGC:RSK:MSK CAMK:RSKb:MSKb	8986	pRK7-HA-MSK2	N	N	N			Enhanced
54	1E6	RPS6KA6	AGC:RSK:RSKp90 CAMK:RSKb:RSKb	27330	pLX304/CMV/Flag	C	MI	N	MI		Supported
60	1E12	SGK3	AGC:SGK:	23678	pXN-HA-Flag	N	V	V			Supported
64	1F4	ADCK3	Atypical:ABC1:ABC1-A	56997	pcDNA-C-Myc	C	MI	MI			Supported
65	1F5	ADCK4	Atypical:ABC1:ABC1-A	79934	pcDNA-C-Flag	C	MI	MI			Enhanced
70	1F10	ALPK2	Atypical:Alpha:Alpha-Unclassified	115701	pXN-HA-Flag	N	C	C			Approved
78	1G6	BCR	Atypical:BCR:	613	pXN-HA-Flag	N	C	N	C		Approved
80	1G8	BRD2	Atypical:BRD:	6046	pXN-HA-Flag	N	N	N			Enhanced
81	1G9	BRD3	Atypical:BRD:	8019	pXN-HA-Flag	N	N	N			Approved
82	1G10	BRD4	Atypical:BRD:	23476	pCMV-Flag-BRD4	N	N	N			Enhanced
86	1H2	STK19	Atypical:G11:	8859	pXN-HA-Flag	N	N	N			Supported
87	1H3	GTF2F1	Atypical:GTF2F1:	2962	pXN-HA-Flag	N	N	N			Enhanced
88	1H4	BCKDK	Atypical:PDHK:BCKDK	10295	pLX304/CMV/Flag	C	MI	MI			Supported
89	1H5	PDK1	Atypical:PDHK:PDHK	5163	pLX304/CMV/Flag	C	MI	MI	N		Supported
90	1H6	PDK2	Atypical:PDHK:PDHK	5164	pcDNA-C-Myc	C	MI	MI	N		Supported
91	1H7	PDK3	Atypical:PDHK:PDHK	5165	pLX304/CMV/Flag	C	MI	MI			Supported
94	1H10	ATR	Atypical:PIKK:ATR	545	pXN-HA-Flag	N	N	N			Supported
96	1H12	MTOR	Atypical:PIKK:FRAP	2475	pRK5-Myc	N	C	V	C		Approved
99	2A3	RIOK1	Atypical:RIO:RIO1	83732	pLX304/CMV/Flag	C	N	N			Approved
100	2A4	RIOK2	Atypical:RIO:RIO2	55781	pXN-HA-Flag	N	C	C			Approved
101	2A5	RIOK3	Atypical:RIO:RIO3	8780	pLX304/CMV/Flag	C	C	PM	C		Approved
104	2A8	TRIM24	Atypical:TIF1:	8805	pXN-HA-Flag	N	N	N			Enhanced
108	2A12	CAMK1	CAMK:CAMK1:	8536	pLX304/CMV/Flag	C	C	C			Approved
109	2B1	CAMK1D	CAMK:CAMK1:	57118	pLX304/CMV/Flag	C	C	N	C		Approved
117	2B9	PRKAA1	CAMK:CAMKL:AMPK	5562	pcDNA3-HA	N	N	N			Supported
118	2B10	PRKAA2	CAMK:CAMKL:AMPK	5563	pLX304/CMV/Flag	C	N	N			Supported
121	2C1	CHEK1	CAMK:CAMKL:CHK1	1111	pXN-HA-Flag	N	N	N			Supported
123	2C3	STK11	CAMK:CAMKL:LKB	6794	pLX304/CMV/Flag	C	N	N			Supported
125	2C5	MARK2	CAMK:CAMKL:MARK	2011	pXN-HA-Flag	N	PM	PM			Supported
127	2C7	MARK4	CAMK:CAMKL:MARK	57787	pRK7-N-Flag-WT	N	C	C			Supported
131	2C11	NUAK2	CAMK:CAMKL:NuaK	81788	pXN-HA-Flag	N	N	N	C		Approved
132	2C12	PASK	CAMK:CAMKL:PASK	23178	Myc-PASK	N	C	C			Supported
133	2D1	SIK1	CAMK:CAMKL:QIK	150094	pLX304/CMV/Flag	C	N	N			Approved
142	2D10	STK17A	CAMK:DAPK:DRAK	9263	pXN-HA-Flag	N	N	N			Supported
148	2E4	MAPKAPK3	CAMK:MAPKAPK:MK2	7867	pLX304/CMV/Flag	C	N	N			Supported
149	2E5	MAPKAPK5	CAMK:MAPKAPK:MK5	8550	pXN-HA-Flag	N	N	N	C		Supported
158	2F2	PHKG2	CAMK:PHK:	5261	pcDNA-C-Flag	C	C	C			Supported
161	2F5	PIM3	CAMK:PIM:	415116	pcDNA-C-Flag	C	C	C			Supported
162	2F6	PRKD1	CAMK:PKD:	5587	pcDNA-C-Myc	C	PM	PM			Supported
165	2F9	PSKH1	CAMK:PSK:	5681	pcDNA-C-Flag	C	N	N			Approved
167	2F11	CHEK2	CAMK:RAD53:	11200	pXN-HA-Flag	N	N	N			Supported
171	2G3	TRIB2	CAMK:Trbl:	28951	pLX304/CMV/Flag	C	N	N	C		Approved
172	2G4	TRIB3	CAMK:Trbl:	57761	pXN-HA-Flag	N	N	N			Supported
173	2G5	KALRN	CAMK:Trio:	8997	pXN-HA-Flag	N	C	N	C		Approved
182	2H2	CSNK1A1	CK1:CK1:CK1-A	1452	pXN-HA-Flag	N	C	C			Supported
183	2H3	CSNK1A1L	CK1:CK1:CK1-A	122011	pXN-HA-Flag	N	C	C			Uncertain
185	2H5	CSNK1E	CK1:CK1:CK1-D	1454	pLX304/CMV/Flag	C	C	N	C		Approved
189	2H9	TTBK1	CK1:TTBK:	84630	pXN-HA-Flag	N	C	C			Supported
191	2H11	VRK1	CK1:VRK:	7443	pLX304/CMV/Flag	C	N	N			Supported
192	2H12	VRK2	CK1:VRK:	7444	pXN-HA-Flag	N	ER	ER			Supported
193	3A1	VRK3	CK1:VRK:	51231	pXN-HA-Flag	N	N	N	V		Supported
195	3A3	CDK1	CMGC:CDK:CDC2	983	pLX304/CMV/Flag	C	C	C			Supported
196	3A4	CDK10	CMGC:CDK:CDK10	8558	pLX304/CMV/Flag	C	N	N			Uncertain
200	3A8	CDK3	CMGC:CDK:CDK2	1018	pLX304/CMV/Flag	C	C	C			Approved
201	3A9	CDK4	CMGC:CDK:CDK4	1019	pLX304/CMV/Flag	C	C	C			Supported
205	3B1	CDK19	CMGC:CDK:CDK8	23097	pcDNA3.1 N-Flag/Hygro	N	N	N	V		Approved
206	3B2	CDK8	CMGC:CDK:CDK8	1024	pXN-HA-Flag	N	N	N			Approved
207	3B3	CDK9	CMGC:CDK:CDK9	1025	pLX304/CMV/Flag	C	N	N			Approved
208	3B4	CDK12	CMGC:CDK:CRK7	51755	pXN-HA-Flag	N	N	N			Enhanced
209	3B5	CDK13	CMGC:CDK:CRK7	8621	pXN-HA-Flag	N	N	N			Supported
210	3B6	CDK16	CMGC:CDK:PCTAIRE	5127	pLX304/CMV/Flag	C	C	PM	CS	C	Uncertain
213	3B9	CDK14	CMGC:CDK:PFTAIRE	5218	pXN-HA-Flag	N	C	N	C		Supported
214	3B10	CDK15	CMGC:CDK:PFTAIRE	65061	pXN-HA-Flag	N	N	N			Approved
217	3C1	CDKL3	CMGC:CDKL:	51265	pXN-HA-Flag	N	N	N	V		Uncertain
220	3C4	CSNK2A1	CMGC:CK2:	1457	pLX304/CMV/Flag	C	N	N			Supported
222	3C6	CLK1	CMGC:CLK:	1195	pXN-HA-Flag	N	N	N			Supported
223	3C7	CLK2	CMGC:CLK:	1196	pLX304/CMV/Flag	C	N	N			Supported
224	3C8	CLK3	CMGC:CLK:	1198	pLX304/CMV/Flag	C	N	N	CS		Supported
227	3C11	DYRK1B	CMGC:DYRK:DYRK1	9149	pLX304/CMV/Flag	C	N	N			Supported
228	3C12	DYRK2	CMGC:DYRK:DYRK2	8445	HA-DYRK2	N	N	N			Supported
232	3D4	HIPK2	CMGC:DYRK:HIPK	15258	pXN-HA-Flag	N	N	N			Supported
235	3D7	PRPF4B	CMGC:DYRK:PRP4	8899	pXN-HA-Flag	N	N	N			Supported
236	3D8	GSK3A	CMGC:GSK:	2931	pLX304/CMV/Flag	C	C	C			Approved
243	3E3	MAPK15	CMGC:MAPK:ERK7	332110	pXN-HA-Flag	N	C	N	C		Approved
252	3E12	CILK1	CMGC:RCK:MAK	22858	pXN-HA-Flag	N	N	N			Supported
255	3F3	SRPK1	CMGC:SRPK:	6732	pLX304/CMV/Flag	C	C	N	C		Supported
256	3F4	SRPK2	CMGC:SRPK:	6733	pXN-HA-Flag	N	C	N	C		Supported
258	3F6	NME1	NDK:NDK:	4830	pLX304/CMV/Flag	C	C	C			Enhanced
259	3F7	NME2	NDK:NDK:	4831	pLX304/CMV/Flag	C	C	C			Supported
261	3F9	NME4	NDK:NDK:	4833	pcDNA-C-Myc	C	MI	MI			Supported
262	3F10	NME5	NDK:NDK:	8382	pLX304/CMV/Flag	C	N	N			Approved
267	3G3	AURKA	Other:Aur:	6790	pXN-HA-Flag	N	C	N	CT	C	Approved
268	3G4	AURKB	Other:Aur:	9212	pLX304/CMV/Flag	C	N	N			Supported
271	3G7	BUB1B	Other:BUB:	701	pXN-HA-Flag	N	C	C			Supported
273	3G9	CAMKK1	Other:CAMKK:CAMKK-Meta	84254	pLX304/CMV/Flag	C	C	C			Supported
274	3G10	CAMKK2	Other:CAMKK:CAMKK-Meta	10645	pcDNA3-N-Flag	N	C	C			Supported
275	3G11	CDC7	Other:CDC7:	8317	pXC-Flag	C	N	N			Supported
277	3H1	HASPIN	Other:Haspin:	83903	pXN-HA-Flag	N	N	N			Supported
279	3H3	IKBKB	Other:IKK:	3551	pcDNA3-N-HA	N	C	C			Approved
280	3H4	IKBKE	Other:IKK:	9641	pLX304/CMV/Flag	C	C	C			Supported
284	3H8	UHMK1	Other:KIS:	127933	pXN-HA-Flag	N	N	N	GL		Supported
288	3H12	GAK	Other:NAK:GAK	2580	pEGFP-EGFP	N	GL	GL			Supported
290	4A2	NEK1	Other:NEK:NEK1	4750	pXN-HA-Flag	N	C	C			Supported
296	4A8	NEK4	Other:NEK:NEK4	23955	pXN-HA-Flag	N	C	C			Supported
297	4A9	NEK6	Other:NEK:NEK6	10783	pLX304/CMV/Flag	C	N	N	CT	C	Supported
298	4A10	NEK7	Other:NEK:NEK6	140609	pLX304/CMV/Flag	C	N	N			Supported
310	4B10	NRBP1	Other:NRBP:	29959	pcDNA-C-Flag	C	C	C			Supported
311	4B11	NRBP2	Other:NRBP:	223649	pcDNA-C-Flag	C	C	C			Approved
312	4B12	RNASEL	Other:Other-Unique:	6041	pXN-HA-Flag	N	C	C			Supported
319	4C7	EIF2AK2	Other:PEK:PKR	5610	pXN-HA-Flag	N	C	C			Enhanced
321	4C9	PLK2	Other:PLK:PLK2	10769	HA-PLK2	N	C	N	MI	C	Approved
323	4C11	PLK4	Other:PLK:SAK	10733	pXN-HA-Flag	N	CT	CT	C		Supported
324	4C12	SCYL1	Other:SCY1:	57410	pCMV-SPORT6-N-Flag	N	C	C			Supported
331	4D7	TLK1	Other:TLK:	9874	pXC-Flag	C	N	N			Supported
334	4D10	TTK	Other:TTK:	7272	pXN-HA-Flag	N	C	N	C		Approved
335	4D11	STK36	Other:ULK:Fused	27148	pXN-HA-Flag	N	C	C			Supported
336	4D12	ULK1	Other:ULK:ULK	8408	Flag-ULK1	N	C	C			Approved
339	4E3	ULK4	Other:ULK:ULK	54986	pXN-HA-Flag	N	C	N	MI	C	Approved
343	4E7	WEE1	Other:WEE:WEE1	7465	pXN-HA-Flag	N	N	N			Approved
345	4E9	WNK2	Other:WNK:	65268	pCMV-3XFlag-WNK2	N	C	C			Approved
351	4F3	FAM20B	PKL:FJ:	9917	pXN-HA-Flag	N	GL	GL			Supported
352	4F4	FAM20C	PKL:FJ:	56975	pcDNA-C-Flag	C	GL	GL			Approved
360	4F12	MAP3K5	STE:STE11:ASK	4217	pLX304/CMV/Flag	C	C	C			Supported
364	4G4	MAP3K2	STE:STE11:MEKK2	10746	pXN-HA-Flag	N	C	N	C		Supported
367	4G7	OXSR1	STE:STE20:FRAY	9943	pLX304/CMV/Flag	C	C	C			Enhanced
372	4G12	MAP4K5	STE:STE20:KHS	11183	pXN-HA-Flag	N	C	PM	C		Approved
381	4H9	PAK1	STE:STE20:PAKA	5058	pcDNA-C-Flag	C	C	PM	C		Supported
387	5A3	SLK	STE:STE20:SLK	9748	Flag-SLK	N	C	PM	C		Approved
389	5A5	STRADA	STE:STE20:STLK	92335	HA-STRADA	N	N	N	C		Supported
395	5A11	STK24	STE:STE20:YSK	8428	pLX304/CMV/Flag	C	C	N	C		Supported
397	5B1	MAP2K1	STE:STE7:MEK1	5604	pLX304/CMV/Flag	C	C	PM	C		Enhanced
398	5B2	MAP2K2	STE:STE7:MEK1	5605	pLX304/CMV/Flag	C	C	C			Supported
399	5B3	MAP2K3	STE:STE7:MEK3	5606	pXN-HA-Flag	N	C	N	C		Supported
400	5B4	MAP2K6	STE:STE7:MEK3	5608	pLX304/CMV/Flag	C	C	N	C		Supported
403	5B7	MAP2K7	STE:STE7:MEK7	5609	pcDNA-Flag	N	C	PM	C		Approved
404	5B8	MAP3K14	STE:STE-Unique:	9020	pXN-HA-Flag	N	C	V	C		Approved
405	5B9	MAP3K8	STE:STE-Unique:	1326	pXN-HA-Flag	N	C	C			Supported
412	5C4	AXL	TK:Axl:	558	pcDNA-C-Flag	C	PM	PM			Supported
413	5C5	MERTK	TK:Axl:	10461	pXC-Flag	C	C	ER	N	C	Approved
416	5C8	CSK	TK:Csk:	1445	pLX304/CMV/Flag	C	C	V	C		Approved
418	5C10	DDR1	TK:DDR:	780	pLX304/CMV/Flag	C	PM	N	PM		Approved
421	5D1	ERBB2	TK:EGFR:	2064	pLX304/CMV/Flag	C	PM	PM			Supported
427	5D7	EPHA3	TK:Eph:	2042	pXN-HA-Flag	N	PM	C	N	PM	Supported
433	5E1	EPHB1	TK:Eph:	2047	pLX304/CMV/Flag	C	PM	ER	PM	C	Supported
439	5E7	PTK2B	TK:FAK:	2185	pXN-HA-Flag	N	C	PM	C		Supported
441	5E9	FES	TK:Fer:	2242	pLX304/CMV/Flag	C	C	N	C		Approved
451	5F7	JAK3	TK:Jak: TK:JakB:	3718	pcDNA-C-Flag	C	C	PM	C		Approved
454	5F10	LMTK2	TK:Lmr:	22853	pcDNA-C-Flag	C	N	N	CT		Approved
456	5F12	MET	TK:Met:	4233	pXN-HA-Flag	N	C	PM	C		Supported
457	5G1	MST1R	TK:Met:	4486	pLX304/CMV/Flag	C	C	C			Approved
470	5H2	FGR	TK:Src:SrcA	2268	pLX304/CMV/Flag	C	PM	PM			Approved
472	5H4	SRC	TK:Src:SrcA	6714	pLX304/CMV/Flag	C	PM	PM			Supported
473	5H5	YES1	TK:Src:SrcA	7525	pXN-HA-Flag	N	PM	PM	C		Supported
477	5H9	LYN	TK:Src:SrcB	4067	pLX304/CMV/Flag	C	PM	GL	PM		Supported
483	6A3	BTK	TK:Tec:	695	pLX304/CMV/Flag	C	C	PM	C		Supported
487	6A7	TEK	TK:Tie:	7010	pcDNA-C-Myc	C	PM	PM			Supported
500	6B8	LIMK1	TKL:LISK:LIMK	3984	pLX304/CMV/Flag	C	C	N	C		Supported
501	6B9	LIMK2	TKL:LISK:LIMK	3985	pLX304/CMV/Flag	C	C	N	C		Supported
504	6B12	LRRK1	TKL:LRRK:	79705	pXN-HA-Flag	N	C	C	MI		Supported
511	6C7	MAP3K10	TKL:MLK:MLK	4294	pXN-HA-Flag	N	C	N	CS	C	Approved
514	6C10	MAP3K7	TKL:MLK:TAK1	6885	pXC-Flag	C	C	C			Supported
522	6D6	RIPK1	TKL:RIPK:	8737	pLX304/CMV/Flag	C	C	C	PM		Enhanced
523	6D7	RIPK2	TKL:RIPK:	8767	pLX304/CMV/Flag	C	C	C			Enhanced
534	6E6	ACVR2B	TKL:STKR:STKR2	93	pXN-HA-Flag	N	C	N	C		Approved

## Sheet: KA-HPA unmatched
#	position	Official Symbol	Classification	Gene ID	Vector	Tag position	KA specific localization	HPA
								Main 1	Main 2	Main 3	Evidence
1	1A1	AKT1	AGC:Akt:	207	pLX304/CMV/Flag	C	PM	N			Supported
2	1A2	AKT2	AGC:Akt:	208	pXN-HA-Flag	N	PM	N	V	C	Supported
3	1A3	AKT3	AGC:Akt:	10000	pXN-HA-Flag	N	PM	C			Supported
4	1A4	CIT	AGC:DMPK:CRIK	11113	pcDNA-C-Myc	C	V	C			Approved
5	1A5	CDC42BPA	AGC:DMPK:GEK	8476	pcDNA-C-Myc	C	PM	CS			Approved
7	1A7	CDC42BPG	AGC:DMPK:GEK	55561	pXN-HA-Flag	N	V	C			Supported
11	1A11	GRK2	AGC:GRK:BARK	156	pLX304/CMV/Flag	C	C	V			Approved
12	1A12	GRK3	AGC:GRK:BARK	157	pXN-HA-Flag	N	C	N			Approved
14	1B2	GRK4	AGC:GRK:GRK	2868	pXN-HA-Flag	N	C	V			Supported
16	1B4	GRK6	AGC:GRK:GRK	2870	pcDNA-C-Flag	C	PM	MI			Approved
18	1B6	MAST1	AGC:MAST:MAST	56527	pXN-HA-Flag	N	C	V			Approved
23	1B11	LATS1	AGC:NDR:LATS	9113	pcDNA3-HA-Lats1	N	C	V			Approved
24	1B12	LATS2	AGC:NDR:LATS	26524	pcDNA3-HA-Lats2	N	V	CT	C		Supported
26	1C2	STK38L	AGC:NDR:NDR	23012	pcDNA-C-Myc	C	N	C			Approved
27	1C3	PDPK1	AGC:PDK1:	5170	pLX304/CMV/Flag	C	C	V			Approved
28	1C4	PRKACA	AGC:PKA:	5566	pLX304/CMV/Flag	C	GL	C			Approved
31	1C7	PRKX	AGC:PKA:	5613	pXN-HA-Flag	N	C	N			Supported
34	1C10	PRKCB	AGC:PKC:PKCa	5579	pLX304/CMV/Flag	C	C	N			Supported
36	1C12	PRKCD	AGC:PKC:PKCd	5580	pXN-HA-Flag	N	C	ER	GL		Supported
37	1D1	PRKCQ	AGC:PKC:PKCd	5588	pXN-HA-Flag	N	PM	CT			Enhanced
39	1D3	PRKCH	AGC:PKC:PKCh	5583	pLX304/CMV/Flag	C	MI	C			Approved
40	1D4	PRKCI	AGC:PKC:PKCi	5584	pXN-HA-Flag	N	PM	C			Supported
41	1D5	PRKCZ	AGC:PKC:PKCi	5590	pLX304/CMV/Flag	C	PM	C			Supported
44	1D8	PKN1	AGC:PKN:	5585	pXN-HA-Flag	N	C	N			Supported
45	1D9	PKN2	AGC:PKN:	5586	pXN-HA-Flag	N	C	N	CS		Enhanced
46	1D10	PKN3	AGC:PKN:	29941	pcDNA-C-Myc	C	PM	V			Approved
48	1D12	RPS6KA5	AGC:RSK:MSK CAMK:RSKb:MSKb	9252	pLX304/CMV/Flag	C	C	N			Enhanced
52	1E4	RPS6KA2	AGC:RSK:RSKp90 CAMK:RSKb:RSKb	6196	pcDNA-C-Flag	C	PM	N			Supported
53	1E5	RPS6KA3	AGC:RSK:RSKp90 CAMK:RSKb:RSKb	6197	pLX304/CMV/Flag	C	C	N			Approved
56	1E8	RPS6KL1	AGC:RSKL:	83694	pcDNA-C-Flag	C	C	N			Approved
58	1E10	SGK1	AGC:SGK:	6446	N-HA-S422D	N	C	N			Enhanced
59	1E11	SGK2	AGC:SGK:	10110	pLX304/CMV/Flag	C	C	N			Supported
62	1F2	STK32B	AGC:YANK:	55351	pXN-HA-Flag	N	C	CS			Approved
66	1F6	ADCK1	Atypical:ABC1:ABC1-B	57143	pXN-HA-Flag	N	MI	N			Approved
67	1F7	ADCK2	Atypical:ABC1:ABC1-C	90956	pXC-Flag	C	MI	CT	C		Uncertain
74	1G2	EEF2K	Atypical:Alpha:eEF2K	29904	pLX304/CMV/Flag	C	C	N			Approved
77	1G5	ABR	Atypical:BCR:	29	pXN-HA-Flag	N	PM	C			Approved
84	1G12	CERT1	Atypical:Col4A3BP:	10087	pLX304/CMV/Flag	C	C	ER			Enhanced
85	1H1	FASTK	Atypical:FAST:	10922	pLX304/CMV/Flag	C	N	MI			Approved
102	2A6	TAF1	Atypical:TAF1:	6872	pXN-HA-Flag	N	C	N			Enhanced
113	2B5	CAMK2A	CAMK:CAMK2:	815	pLX304/CMV/Flag	C	C	PM			Approved
114	2B6	CAMK2B	CAMK:CAMK2:	816	pLX304/CMV/Flag	C	C	PM			Supported
115	2B7	CAMK2D	CAMK:CAMK2:	817	pLX304/CMV/Flag	C	C	PM			Approved
116	2B8	CAMK2G	CAMK:CAMK2:	818	pXN-HA-Flag	N	N	PM			Approved
119	2B11	BRSK1	CAMK:CAMKL:BRSK	84446	pEBG2T-GST-HA	N	PM	N			Supported
120	2B12	BRSK2	CAMK:CAMKL:BRSK	9024	pLX304/CMV/Flag	C	PM	GL			Approved
129	2C9	NIM1K	CAMK:CAMKL:NIM1	167359	pXN-HA-Flag	N	PM	C			Approved
135	2D3	SIK3	CAMK:CAMKL:QIK	23387	pXN-HA-Flag	N	C	N			Enhanced
136	2D4	SNRK	CAMK:CAMKL:SNRK	54861	pXN-HA-Flag	N	C	V	PM		Approved
137	2D5	CAMKV	CAMK:CAMK-Unique:	79012	pLX304/CMV/Flag	C	PM	N			Approved
138	2D6	CASK	CAMK:CASK:	8573	pLX304/CMV/Flag	C	C	N			Approved
139	2D7	DAPK1	CAMK:DAPK:DAPK	1612	pLX304/CMV/Flag	C	C	CT			Approved
140	2D8	DAPK2	CAMK:DAPK:DAPK	23604	pLX304/CMV/Flag	C	C	V	GL		Supported
143	2D11	STK17B	CAMK:DAPK:DRAK	9262	pXN-HA-Flag	N	N	PM	C		Uncertain
147	2E3	MAPKAPK2	CAMK:MAPKAPK:MK2	9261	pXN-HA-Flag	N	C	N			Supported
150	2E6	MKNK1	CAMK:MAPKAPK:MNK	8569	pLX304/CMV/Flag	C	C	N			Supported
151	2E7	MKNK2	CAMK:MAPKAPK:MNK	2872	pXN-HA-Flag	N	C	N			Supported
154	2E10	MYLK3	CAMK:MLCK:	91807	pLX304/CMV/Flag	C	C	N			Approved
159	2F3	PIM1	CAMK:PIM:	5292	pXN-HA-Flag	N	N	C			Supported
160	2F4	PIM2	CAMK:PIM:	11040	pLX304/CMV/Flag	C	N	C			Approved
163	2F7	PRKD2	CAMK:PKD:	25865	pLX304/CMV/Flag	C	C	N			Supported
166	2F10	PSKH2	CAMK:PSK:	85481	pXN-HA-Flag	N	C	N			Approved
168	2F12	STK40	CAMK:SgK495:	83931	pLX304/CMV/Flag	C	N	C			Supported
170	2G2	TRIB1	CAMK:Trbl:	10221	pXN-HA-Flag	N	N	PM	C		Approved
176	2G8	SPEG	CAMK:Trio: CAMK:Trio:	10290	pXN-HA-Flag	N	C	V			Approved
179	2G11	TSSK3	CAMK:TSSK:	81629	pXC-Flag	C	AG	N			Approved
184	2H4	CSNK1D	CK1:CK1:CK1-D	1453	pcDNA-C-Flag	C	C	N			Approved
186	2H6	CSNK1G1	CK1:CK1:CK1-G	53944	CSNK1G1-Myc	C	PM	C			Supported
194	3A2	CDK20	CMGC:CDK:CCRK	23552	pLX304/CMV/Flag	C	C	N			Supported
199	3A7	CDK2	CMGC:CDK:CDK2	1017	pLX304/CMV/Flag	C	C	N			Enhanced
202	3A10	CDK6	CMGC:CDK:CDK4	1021	pLX304/CMV/Flag	C	C	N			Supported
203	3A11	CDK5	CMGC:CDK:CDK5	1020	pLX304/CMV/Flag	C	C	PM			Supported
212	3B8	CDK18	CMGC:CDK:PCTAIRE	5129	pXN-HA-Flag	N	C	CS			Approved
215	3B11	CDKL1	CMGC:CDKL:	8814	pcDNA-C-Flag	C	C	N	V		Enhanced
216	3B12	CDKL2	CMGC:CDKL:	8999	pXN-HA-Flag	N	C	N	CT		Supported
225	3C9	CLK4	CMGC:CLK:	57396	pXN-HA-Flag	N	N	CS			Approved
226	3C10	DYRK1A	CMGC:DYRK:DYRK1	1859	HA-DYRK1A	N	N	C			Approved
229	3D1	DYRK3	CMGC:DYRK:DYRK2	8444	pXN-HA-Flag	N	C	N			Supported
230	3D2	DYRK4	CMGC:DYRK:DYRK2	8798	pXN-HA-Flag	N	C	V			Enhanced
231	3D3	HIPK1	CMGC:DYRK:HIPK	204851	pXN-HA-Flag	N	C	N	CT	GL	Approved
233	3D5	HIPK3	CMGC:DYRK:HIPK	10114	pXN-HA-Flag	N	N	C			Supported
237	3D9	GSK3B	CMGC:GSK:	2932	pXN-HA-Flag	N	C	N			Supported
239	3D11	MAPK3	CMGC:MAPK:ERK1	5595	pcDNA-C-Flag	C	C	N			Approved
240	3D12	MAPK4	CMGC:MAPK:ERK3	5596	pXN-HA-Flag	N	C	N	GL		Approved
241	3E1	MAPK6	CMGC:MAPK:ERK3	5597	pXN-Myc-His	N	N	C			Enhanced
242	3E2	MAPK7	CMGC:MAPK:ERK5	5598	pXN-HA-Flag	N	C	N			Enhanced
247	3E7	NLK	CMGC:MAPK:nmo	51701	pCMV-NLK-Flag	C	PM	N			Supported
248	3E8	MAPK11	CMGC:MAPK:p38	5600	pXN-HA-Flag	N	PM	MI			Approved
249	3E9	MAPK12	CMGC:MAPK:p38	6300	pLX304/CMV/Flag	C	C	N			Approved
250	3E10	MAPK13	CMGC:MAPK:p38	5603	pLX304/CMV/Flag	C	C	N			Approved
251	3E11	MAPK14	CMGC:MAPK:p38	1432	pLX304/CMV/Flag	C	C	N			Supported
254	3F2	MOK	CMGC:RCK:MOK	5891	pXN-HA-Flag	N	C	ER			Supported
260	3F8	NME3	NDK:NDK:	4832	pcDNA-C-Myc	C	MI	N			Approved
263	3F11	NME6	NDK:NDK:	10201	pLX304/CMV/Flag	C	MI	V			Approved
264	3F12	NME7	NDK:NDK:	29922	pLX304/CMV/Flag	C	C	MI			Approved
270	3G6	BUB1	Other:BUB:	699	pXN-HA-Flag	N	C	N			Supported
276	3G12	DSTYK	Other:Dusty:	25778	pLX304/CMV/Flag	C	C	N	CS		Uncertain
287	3H11	BMP2K	Other:NAK:BIKE	55589	pXN-HA-Flag	N	V	N			Supported
289	4A1	STK16	Other:NAK:MPSK	8576	pLX304/CMV/Flag	C	GL	C			Approved
291	4A3	NEK3	Other:NEK:NEK1	4752	pXN-HA-Flag	N	C	CS			Approved
293	4A5	NEK10	Other:NEK:NEK10	152110	pXC-Flag	C	C	V			Approved
294	4A6	NEK11	Other:NEK:NEK11	79858	pXN-HA-Flag	N	C	N			Supported
300	4A12	NEK9	Other:NEK:NEK9	91754	pXN-HA-Flag	N	C	MI			Approved
313	4C1	POMK	Other:Other-Unique:	84197	pLX304/CMV/Flag	C	ER	N			Approved
317	4C5	EIF2AK1	Other:PEK:HRI	27102	pXN-HA-Flag	N	C	N			Supported
326	4D2	SCYL3	Other:SCY1:	57147	pLX304/CMV/Flag	C	GL	CS			Uncertain
330	4D6	TBCK	Other:TBCK:	93627	pXN-HA-Flag	N	C	N			Approved
333	4D9	PBK	Other:TOPK:	55872	pLX304/CMV/Flag	C	N	C			Approved
340	4E4	PIK3R4	Other:VPS15:	30849	pXN-HA-Flag	N	C	V			Approved
341	4E5	PKMYT1	Other:WEE:Myt1	9088	pXN-HA-Flag	N	ER	GL			Supported
348	4E12	GASK1A	PKL:FJ:	729085	pXN-HA-Flag	N	GL	V			Supported
349	4F1	GASK1B	PKL:FJ:	51313	pXN-HA-Flag	N	ER	N	GL		Approved
353	4F5	FJX1	PKL:FJ:	24147	pXN-HA-Flag	N	GL	V			Approved
354	4F6	GUCY2C	RGC:RGC:	2984	pXN-HA-Flag	N	C	V			Uncertain
359	4F11	MAP3K15	STE:STE11:ASK	389840	pcDNA-C-Flag	C	C	V			Approved
365	4G5	MAP3K3	STE:STE11:MEKK2	4215	pCMV-3XFlag-MEKK3	N	C	N			Approved
368	4G8	STK39	STE:STE20:FRAY	27347	pXN-HA-Flag	N	C	N			Supported
370	4G10	MAP4K2	STE:STE20:KHS	5871	pcDNA-C-Myc	C	PM	V			Approved
371	4G11	MAP4K3	STE:STE20:KHS	8491	pcDNA-Flag	N	ER	CT			Approved
376	4H4	TNIK	STE:STE20:MSN	23043	HA-TNIK-PGW1	N	C	N			Supported
377	4H5	STK3	STE:STE20:MST	6788	pLX304/CMV/Flag	C	C	CS			Approved
378	4H6	STK4	STE:STE20:MST	58231	Flag-STK4	N	C	N			Supported
382	4H10	PAK2	STE:STE20:PAKA	5062	pXN-HA-Flag	N	C	N	V		Approved
384	4H12	PAK4	STE:STE20:PAKB	10298	pLX304/CMV/Flag	C	C	PM			Supported
385	5A1	PAK6	STE:STE20:PAKB	56924	pXN-HA-Flag	N	PM	N			Supported
386	5A2	PAK5	STE:STE20:PAKB	57144	pLX304/CMV/Flag	C	V	N			Approved
388	5A4	STK10	STE:STE20:SLK	6793	pXC-Flag	C	C	N	PM		Approved
391	5A7	TAOK1	STE:STE20:TAO	57551	pRK5-N-Myc	N	C	V			Approved
393	5A9	TAOK3	STE:STE20:TAO	51347	pLX304/CMV/Flag	C	C	MI			Uncertain
401	5B5	MAP2K4	STE:STE7:MEK4	6416	pXN-HA-Flag	N	C	N			Approved
402	5B6	MAP2K5	STE:STE7:MEK5	5607	pLX304/CMV/Flag	C	C	N	CS		Approved
406	5B10	ABL1	TK:Abl:	25	pLX304/CMV/Flag	C	C	N			Enhanced
407	5B11	ABL2	TK:Abl:	27	pXN-HA-Flag	N	CS	N			Supported
408	5B12	TNK1	TK:Ack:	8711	pcDNA-C-Flag	C	C	PM			Approved
409	5C1	TNK2	TK:Ack:	10188	pXC-Flag	C	V	C			Approved
417	5C9	MATK	TK:Csk:	4145	pLX304/CMV/Flag	C	C	CS			Approved
422	5D2	ERBB3	TK:EGFR:	2065	pLX304/CMV/Flag	C	PM	CS			Approved
426	5D6	EPHA2	TK:Eph:	1969	pLX304/CMV/Flag	C	V	PM			Supported
430	5D10	EPHA6	TK:Eph:	13840	pcDNA-C-Myc	C	GL	N			Enhanced
437	5E5	EPHB6	TK:Eph:	2051	pXN-HA-Flag	N	C	N			Approved
438	5E6	PTK2	TK:FAK:	5747	pLX304/CMV/Flag	C	C	PM			Supported
446	5F2	IGF1R	TK:InsR:	3480	pcDNA-C-Myc	C	PM	V			Approved
452	5F8	TYK2	TK:Jak: TK:JakB:	7297	pLX304/CMV/Flag	C	N	C			Approved
461	5G5	KIT	TK:PDGFR:	3815	pXN-HA-Flag	N	C	PM			Supported
463	5G7	PDGFRB	TK:PDGFR:	5159	pXN-HA-Flag	N	C	V			Supported
464	5G8	RET	TK:Ret:	5979	pcDNA-C-3XFlag	C	ER	GL	C		Approved
465	5G9	ROR1	TK:Ror:	4919	pLX304/CMV/Flag	C	ER	CS			Approved
467	5G11	RYK	TK:Ryk:	6259	pXN-HA-Flag	N	C	GL			Approved
468	5G12	ROS1	TK:Sev:	6098	pXN-HA-Flag	N	C	V			Approved
469	5H1	FRK	TK:Src:Frk	2444	pLX304/CMV/Flag	C	PM	N			Supported
471	5H3	FYN	TK:Src:SrcA	2534	pXN-HA-Flag	N	C	PM			Enhanced
474	5H6	BLK	TK:Src:SrcB	640	pLX304/CMV/Flag	C	PM	N			Approved
476	5H8	LCK	TK:Src:SrcB	3932	pXN-HA-Flag	N	C	GL			Approved
485	6A5	TEC	TK:Tec:	7006	pXN-HA-Flag	N	V	PM			Supported
489	6A9	STYK1	TK:TK-Unique:	55359	pLX304/CMV/Flag	C	AG	PM			Approved
491	6A11	NTRK2	TK:Trk:	4915	pEGFP-N1-TrkB	C	GL	C			Approved
496	6B4	IRAK1	TKL:IRAK:	3654	pcDNA-C-Myc	C	PM	C			Supported
497	6B5	IRAK2	TKL:IRAK:	3656	pLX304/CMV/Flag	C	C	V			Approved
507	6C3	ILK	TKL:MLK:ILK	3611	pLX304/CMV/Flag	C	C	PM			Supported
508	6C4	MAP3K12	TKL:MLK:LZK	7786	pcDNA-C-Myc	C	GL	N	PM		Approved
509	6C5	MAP3K13	TKL:MLK:LZK	9175	pcDNA-C-Myc	C	GL	CT			Approved
512	6C8	MAP3K11	TKL:MLK:MLK	4296	pcDNA-C-Myc	C	MI	CT	C		Supported
513	6C9	MAP3K9	TKL:MLK:MLK	4293	pXN-Myc-His	N	C	N			Approved
515	6C11	MAP3K20	TKL:MLK:ZAK	51776	pLX304/CMV/Flag	C	N	C			Supported
518	6D2	ARAF	TKL:RAF:RAF	369	pXN-HA-Flag	N	PM	N			Approved
519	6D3	BRAF	TKL:RAF:RAF	673	pXN-HA-Flag	N	C	V			Approved
520	6D4	RAF1	TKL:RAF:RAF	5894	pXN-HA-Flag	N	C	N			Supported
527	6D11	ACVR1B	TKL:STKR:STKR1	91	pcDNA-C-Myc	C	PM	C			Approved
530	6E2	BMPR1A	TKL:STKR:STKR1	657	pXC-Flag	C	PM	C			Approved
533	6E5	ACVR2A	TKL:STKR:STKR2	92	pXN-HA-Flag	N	ER	C			Approved
535	6E7	AMHR2	TKL:STKR:STKR2	269	pXC-Flag	C	ER	V			Supported
537	6E9	TGFBR2	TKL:STKR:STKR2	7048	pXN-HA-Flag	N	C	PM			Supported

## Sheet: KA-HPA sup enh matched
#	position	Official Symbol	Classification	Gene ID	Vector	Tag position	KA specific localization	HPA
								Main 1	Main 2	Main 3	Evidence
22	1B10	MASTL	AGC:MAST:MASTL	84930	pXN-HA-Flag	N	N	N			Enhanced
33	1C9	PRKCA	AGC:PKC:PKCa	5578	pLX304/CMV/Flag	C	C	C			Enhanced
47	1D11	RPS6KA4	AGC:RSK:MSK CAMK:RSKb:MSKb	8986	pRK7-HA-MSK2	N	N	N			Enhanced
54	1E6	RPS6KA6	AGC:RSK:RSKp90 CAMK:RSKb:RSKb	27330	pLX304/CMV/Flag	C	MI	N	MI		Supported
60	1E12	SGK3	AGC:SGK:	23678	pXN-HA-Flag	N	V	V			Supported
64	1F4	ADCK3	Atypical:ABC1:ABC1-A	56997	pcDNA-C-Myc	C	MI	MI			Supported
65	1F5	ADCK4	Atypical:ABC1:ABC1-A	79934	pcDNA-C-Flag	C	MI	MI			Enhanced
80	1G8	BRD2	Atypical:BRD:	6046	pXN-HA-Flag	N	N	N			Enhanced
82	1G10	BRD4	Atypical:BRD:	23476	pCMV-Flag-BRD4	N	N	N			Enhanced
86	1H2	STK19	Atypical:G11:	8859	pXN-HA-Flag	N	N	N			Supported
87	1H3	GTF2F1	Atypical:GTF2F1:	2962	pXN-HA-Flag	N	N	N			Enhanced
88	1H4	BCKDK	Atypical:PDHK:BCKDK	10295	pLX304/CMV/Flag	C	MI	MI			Supported
89	1H5	PDK1	Atypical:PDHK:PDHK	5163	pLX304/CMV/Flag	C	MI	MI	N		Supported
90	1H6	PDK2	Atypical:PDHK:PDHK	5164	pcDNA-C-Myc	C	MI	MI	N		Supported
91	1H7	PDK3	Atypical:PDHK:PDHK	5165	pLX304/CMV/Flag	C	MI	MI			Supported
94	1H10	ATR	Atypical:PIKK:ATR	545	pXN-HA-Flag	N	N	N			Supported
104	2A8	TRIM24	Atypical:TIF1:	8805	pXN-HA-Flag	N	N	N			Enhanced
117	2B9	PRKAA1	CAMK:CAMKL:AMPK	5562	pcDNA3-HA	N	N	N			Supported
118	2B10	PRKAA2	CAMK:CAMKL:AMPK	5563	pLX304/CMV/Flag	C	N	N			Supported
121	2C1	CHEK1	CAMK:CAMKL:CHK1	1111	pXN-HA-Flag	N	N	N			Supported
123	2C3	STK11	CAMK:CAMKL:LKB	6794	pLX304/CMV/Flag	C	N	N			Supported
125	2C5	MARK2	CAMK:CAMKL:MARK	2011	pXN-HA-Flag	N	PM	PM			Supported
127	2C7	MARK4	CAMK:CAMKL:MARK	57787	pRK7-N-Flag-WT	N	C	C			Supported
132	2C12	PASK	CAMK:CAMKL:PASK	23178	Myc-PASK	N	C	C			Supported
142	2D10	STK17A	CAMK:DAPK:DRAK	9263	pXN-HA-Flag	N	N	N			Supported
148	2E4	MAPKAPK3	CAMK:MAPKAPK:MK2	7867	pLX304/CMV/Flag	C	N	N			Supported
149	2E5	MAPKAPK5	CAMK:MAPKAPK:MK5	8550	pXN-HA-Flag	N	N	N	C		Supported
158	2F2	PHKG2	CAMK:PHK:	5261	pcDNA-C-Flag	C	C	C			Supported
161	2F5	PIM3	CAMK:PIM:	415116	pcDNA-C-Flag	C	C	C			Supported
162	2F6	PRKD1	CAMK:PKD:	5587	pcDNA-C-Myc	C	PM	PM			Supported
167	2F11	CHEK2	CAMK:RAD53:	11200	pXN-HA-Flag	N	N	N			Supported
172	2G4	TRIB3	CAMK:Trbl:	57761	pXN-HA-Flag	N	N	N			Supported
182	2H2	CSNK1A1	CK1:CK1:CK1-A	1452	pXN-HA-Flag	N	C	C			Supported
189	2H9	TTBK1	CK1:TTBK:	84630	pXN-HA-Flag	N	C	C			Supported
191	2H11	VRK1	CK1:VRK:	7443	pLX304/CMV/Flag	C	N	N			Supported
192	2H12	VRK2	CK1:VRK:	7444	pXN-HA-Flag	N	ER	ER			Supported
193	3A1	VRK3	CK1:VRK:	51231	pXN-HA-Flag	N	N	N	V		Supported
195	3A3	CDK1	CMGC:CDK:CDC2	983	pLX304/CMV/Flag	C	C	C			Supported
201	3A9	CDK4	CMGC:CDK:CDK4	1019	pLX304/CMV/Flag	C	C	C			Supported
208	3B4	CDK12	CMGC:CDK:CRK7	51755	pXN-HA-Flag	N	N	N			Enhanced
209	3B5	CDK13	CMGC:CDK:CRK7	8621	pXN-HA-Flag	N	N	N			Supported
213	3B9	CDK14	CMGC:CDK:PFTAIRE	5218	pXN-HA-Flag	N	C	N	C		Supported
220	3C4	CSNK2A1	CMGC:CK2:	1457	pLX304/CMV/Flag	C	N	N			Supported
222	3C6	CLK1	CMGC:CLK:	1195	pXN-HA-Flag	N	N	N			Supported
223	3C7	CLK2	CMGC:CLK:	1196	pLX304/CMV/Flag	C	N	N			Supported
224	3C8	CLK3	CMGC:CLK:	1198	pLX304/CMV/Flag	C	N	N	CS		Supported
227	3C11	DYRK1B	CMGC:DYRK:DYRK1	9149	pLX304/CMV/Flag	C	N	N			Supported
228	3C12	DYRK2	CMGC:DYRK:DYRK2	8445	HA-DYRK2	N	N	N			Supported
232	3D4	HIPK2	CMGC:DYRK:HIPK	15258	pXN-HA-Flag	N	N	N			Supported
235	3D7	PRPF4B	CMGC:DYRK:PRP4	8899	pXN-HA-Flag	N	N	N			Supported
252	3E12	CILK1	CMGC:RCK:MAK	22858	pXN-HA-Flag	N	N	N			Supported
255	3F3	SRPK1	CMGC:SRPK:	6732	pLX304/CMV/Flag	C	C	N	C		Supported
256	3F4	SRPK2	CMGC:SRPK:	6733	pXN-HA-Flag	N	C	N	C		Supported
258	3F6	NME1	NDK:NDK:	4830	pLX304/CMV/Flag	C	C	C			Enhanced
259	3F7	NME2	NDK:NDK:	4831	pLX304/CMV/Flag	C	C	C			Supported
261	3F9	NME4	NDK:NDK:	4833	pcDNA-C-Myc	C	MI	MI			Supported
268	3G4	AURKB	Other:Aur:	9212	pLX304/CMV/Flag	C	N	N			Supported
271	3G7	BUB1B	Other:BUB:	701	pXN-HA-Flag	N	C	C			Supported
273	3G9	CAMKK1	Other:CAMKK:CAMKK-Meta	84254	pLX304/CMV/Flag	C	C	C			Supported
274	3G10	CAMKK2	Other:CAMKK:CAMKK-Meta	10645	pcDNA3-N-Flag	N	C	C			Supported
275	3G11	CDC7	Other:CDC7:	8317	pXC-Flag	C	N	N			Supported
277	3H1	HASPIN	Other:Haspin:	83903	pXN-HA-Flag	N	N	N			Supported
280	3H4	IKBKE	Other:IKK:	9641	pLX304/CMV/Flag	C	C	C			Supported
284	3H8	UHMK1	Other:KIS:	127933	pXN-HA-Flag	N	N	N	GL		Supported
288	3H12	GAK	Other:NAK:GAK	2580	pEGFP-EGFP	N	GL	GL			Supported
290	4A2	NEK1	Other:NEK:NEK1	4750	pXN-HA-Flag	N	C	C			Supported
296	4A8	NEK4	Other:NEK:NEK4	23955	pXN-HA-Flag	N	C	C			Supported
297	4A9	NEK6	Other:NEK:NEK6	10783	pLX304/CMV/Flag	C	N	N	CT	C	Supported
298	4A10	NEK7	Other:NEK:NEK6	140609	pLX304/CMV/Flag	C	N	N			Supported
310	4B10	NRBP1	Other:NRBP:	29959	pcDNA-C-Flag	C	C	C			Supported
312	4B12	RNASEL	Other:Other-Unique:	6041	pXN-HA-Flag	N	C	C			Supported
319	4C7	EIF2AK2	Other:PEK:PKR	5610	pXN-HA-Flag	N	C	C			Enhanced
323	4C11	PLK4	Other:PLK:SAK	10733	pXN-HA-Flag	N	CT	CT	C		Supported
324	4C12	SCYL1	Other:SCY1:	57410	pCMV-SPORT6-N-Flag	N	C	C			Supported
331	4D7	TLK1	Other:TLK:	9874	pXC-Flag	C	N	N			Supported
335	4D11	STK36	Other:ULK:Fused	27148	pXN-HA-Flag	N	C	C			Supported
351	4F3	FAM20B	PKL:FJ:	9917	pXN-HA-Flag	N	GL	GL			Supported
360	4F12	MAP3K5	STE:STE11:ASK	4217	pLX304/CMV/Flag	C	C	C			Supported
364	4G4	MAP3K2	STE:STE11:MEKK2	10746	pXN-HA-Flag	N	C	N	C		Supported
367	4G7	OXSR1	STE:STE20:FRAY	9943	pLX304/CMV/Flag	C	C	C			Enhanced
381	4H9	PAK1	STE:STE20:PAKA	5058	pcDNA-C-Flag	C	C	PM	C		Supported
389	5A5	STRADA	STE:STE20:STLK	92335	HA-STRADA	N	N	N	C		Supported
395	5A11	STK24	STE:STE20:YSK	8428	pLX304/CMV/Flag	C	C	N	C		Supported
397	5B1	MAP2K1	STE:STE7:MEK1	5604	pLX304/CMV/Flag	C	C	PM	C		Enhanced
398	5B2	MAP2K2	STE:STE7:MEK1	5605	pLX304/CMV/Flag	C	C	C			Supported
399	5B3	MAP2K3	STE:STE7:MEK3	5606	pXN-HA-Flag	N	C	N	C		Supported
400	5B4	MAP2K6	STE:STE7:MEK3	5608	pLX304/CMV/Flag	C	C	N	C		Supported
405	5B9	MAP3K8	STE:STE-Unique:	1326	pXN-HA-Flag	N	C	C			Supported
412	5C4	AXL	TK:Axl:	558	pcDNA-C-Flag	C	PM	PM			Supported
421	5D1	ERBB2	TK:EGFR:	2064	pLX304/CMV/Flag	C	PM	PM			Supported
427	5D7	EPHA3	TK:Eph:	2042	pXN-HA-Flag	N	PM	C	N	PM	Supported
433	5E1	EPHB1	TK:Eph:	2047	pLX304/CMV/Flag	C	PM	ER	PM	C	Supported
439	5E7	PTK2B	TK:FAK:	2185	pXN-HA-Flag	N	C	PM	C		Supported
456	5F12	MET	TK:Met:	4233	pXN-HA-Flag	N	C	PM	C		Supported
472	5H4	SRC	TK:Src:SrcA	6714	pLX304/CMV/Flag	C	PM	PM			Supported
473	5H5	YES1	TK:Src:SrcA	7525	pXN-HA-Flag	N	PM	PM	C		Supported
477	5H9	LYN	TK:Src:SrcB	4067	pLX304/CMV/Flag	C	PM	GL	PM		Supported
483	6A3	BTK	TK:Tec:	695	pLX304/CMV/Flag	C	C	PM	C		Supported
487	6A7	TEK	TK:Tie:	7010	pcDNA-C-Myc	C	PM	PM			Supported
500	6B8	LIMK1	TKL:LISK:LIMK	3984	pLX304/CMV/Flag	C	C	N	C		Supported
501	6B9	LIMK2	TKL:LISK:LIMK	3985	pLX304/CMV/Flag	C	C	N	C		Supported
504	6B12	LRRK1	TKL:LRRK:	79705	pXN-HA-Flag	N	C	C	MI		Supported
514	6C10	MAP3K7	TKL:MLK:TAK1	6885	pXC-Flag	C	C	C			Supported
522	6D6	RIPK1	TKL:RIPK:	8737	pLX304/CMV/Flag	C	C	C	PM		Enhanced
523	6D7	RIPK2	TKL:RIPK:	8767	pLX304/CMV/Flag	C	C	C			Enhanced

## Sheet: KA-HPA sup enh unmatched
#	position	Official Symbol	Classification	Gene ID	Vector	Tag position	KA specific localization	HPA
								Main 1	Main 2	Main 3	Evidence
1	1A1	AKT1	AGC:Akt:	207	pLX304/CMV/Flag	C	PM	N			Supported
2	1A2	AKT2	AGC:Akt:	208	pXN-HA-Flag	N	PM	N	V	C	Supported
3	1A3	AKT3	AGC:Akt:	10000	pXN-HA-Flag	N	PM	C			Supported
7	1A7	CDC42BPG	AGC:DMPK:GEK	55561	pXN-HA-Flag	N	V	C			Supported
14	1B2	GRK4	AGC:GRK:GRK	2868	pXN-HA-Flag	N	C	V			Supported
24	1B12	LATS2	AGC:NDR:LATS	26524	pcDNA3-HA-Lats2	N	V	CT	C		Supported
31	1C7	PRKX	AGC:PKA:	5613	pXN-HA-Flag	N	C	N			Supported
34	1C10	PRKCB	AGC:PKC:PKCa	5579	pLX304/CMV/Flag	C	C	N			Supported
36	1C12	PRKCD	AGC:PKC:PKCd	5580	pXN-HA-Flag	N	C	ER	GL		Supported
37	1D1	PRKCQ	AGC:PKC:PKCd	5588	pXN-HA-Flag	N	PM	CT			Enhanced
40	1D4	PRKCI	AGC:PKC:PKCi	5584	pXN-HA-Flag	N	PM	C			Supported
41	1D5	PRKCZ	AGC:PKC:PKCi	5590	pLX304/CMV/Flag	C	PM	C			Supported
44	1D8	PKN1	AGC:PKN:	5585	pXN-HA-Flag	N	C	N			Supported
45	1D9	PKN2	AGC:PKN:	5586	pXN-HA-Flag	N	C	N	CS		Enhanced
48	1D12	RPS6KA5	AGC:RSK:MSK CAMK:RSKb:MSKb	9252	pLX304/CMV/Flag	C	C	N			Enhanced
52	1E4	RPS6KA2	AGC:RSK:RSKp90 CAMK:RSKb:RSKb	6196	pcDNA-C-Flag	C	PM	N			Supported
58	1E10	SGK1	AGC:SGK:	6446	N-HA-S422D	N	C	N			Enhanced
59	1E11	SGK2	AGC:SGK:	10110	pLX304/CMV/Flag	C	C	N			Supported
84	1G12	CERT1	Atypical:Col4A3BP:	10087	pLX304/CMV/Flag	C	C	ER			Enhanced
102	2A6	TAF1	Atypical:TAF1:	6872	pXN-HA-Flag	N	C	N			Enhanced
114	2B6	CAMK2B	CAMK:CAMK2:	816	pLX304/CMV/Flag	C	C	PM			Supported
119	2B11	BRSK1	CAMK:CAMKL:BRSK	84446	pEBG2T-GST-HA	N	PM	N			Supported
135	2D3	SIK3	CAMK:CAMKL:QIK	23387	pXN-HA-Flag	N	C	N			Enhanced
140	2D8	DAPK2	CAMK:DAPK:DAPK	23604	pLX304/CMV/Flag	C	C	V	GL		Supported
147	2E3	MAPKAPK2	CAMK:MAPKAPK:MK2	9261	pXN-HA-Flag	N	C	N			Supported
150	2E6	MKNK1	CAMK:MAPKAPK:MNK	8569	pLX304/CMV/Flag	C	C	N			Supported
151	2E7	MKNK2	CAMK:MAPKAPK:MNK	2872	pXN-HA-Flag	N	C	N			Supported
159	2F3	PIM1	CAMK:PIM:	5292	pXN-HA-Flag	N	N	C			Supported
163	2F7	PRKD2	CAMK:PKD:	25865	pLX304/CMV/Flag	C	C	N			Supported
168	2F12	STK40	CAMK:SgK495:	83931	pLX304/CMV/Flag	C	N	C			Supported
186	2H6	CSNK1G1	CK1:CK1:CK1-G	53944	CSNK1G1-Myc	C	PM	C			Supported
194	3A2	CDK20	CMGC:CDK:CCRK	23552	pLX304/CMV/Flag	C	C	N			Supported
199	3A7	CDK2	CMGC:CDK:CDK2	1017	pLX304/CMV/Flag	C	C	N			Enhanced
202	3A10	CDK6	CMGC:CDK:CDK4	1021	pLX304/CMV/Flag	C	C	N			Supported
203	3A11	CDK5	CMGC:CDK:CDK5	1020	pLX304/CMV/Flag	C	C	PM			Supported
215	3B11	CDKL1	CMGC:CDKL:	8814	pcDNA-C-Flag	C	C	N	V		Enhanced
216	3B12	CDKL2	CMGC:CDKL:	8999	pXN-HA-Flag	N	C	N	CT		Supported
229	3D1	DYRK3	CMGC:DYRK:DYRK2	8444	pXN-HA-Flag	N	C	N			Supported
230	3D2	DYRK4	CMGC:DYRK:DYRK2	8798	pXN-HA-Flag	N	C	V			Enhanced
233	3D5	HIPK3	CMGC:DYRK:HIPK	10114	pXN-HA-Flag	N	N	C			Supported
237	3D9	GSK3B	CMGC:GSK:	2932	pXN-HA-Flag	N	C	N			Supported
241	3E1	MAPK6	CMGC:MAPK:ERK3	5597	pXN-Myc-His	N	N	C			Enhanced
242	3E2	MAPK7	CMGC:MAPK:ERK5	5598	pXN-HA-Flag	N	C	N			Enhanced
247	3E7	NLK	CMGC:MAPK:nmo	51701	pCMV-NLK-Flag	C	PM	N			Supported
251	3E11	MAPK14	CMGC:MAPK:p38	1432	pLX304/CMV/Flag	C	C	N			Supported
254	3F2	MOK	CMGC:RCK:MOK	5891	pXN-HA-Flag	N	C	ER			Supported
270	3G6	BUB1	Other:BUB:	699	pXN-HA-Flag	N	C	N			Supported
287	3H11	BMP2K	Other:NAK:BIKE	55589	pXN-HA-Flag	N	V	N			Supported
294	4A6	NEK11	Other:NEK:NEK11	79858	pXN-HA-Flag	N	C	N			Supported
317	4C5	EIF2AK1	Other:PEK:HRI	27102	pXN-HA-Flag	N	C	N			Supported
430	5D10	EPHA6	TK:Eph:	13840	pcDNA-C-Myc	C	GL	N			Enhanced
341	4E5	PKMYT1	Other:WEE:Myt1	9088	pXN-HA-Flag	N	ER	GL			Supported
348	4E12	FAM198A	PKL:FJ:	729085	pXN-HA-Flag	N	GL	V			Supported
368	4G8	STK39	STE:STE20:FRAY	27347	pXN-HA-Flag	N	C	N			Supported
376	4H4	TNIK	STE:STE20:MSN	23043	HA-TNIK-PGW1	N	C	N			Supported
378	4H6	STK4	STE:STE20:MST	58231	Flag-STK4	N	C	N			Supported
384	4H12	PAK4	STE:STE20:PAKB	10298	pLX304/CMV/Flag	C	C	PM			Supported
385	5A1	PAK6	STE:STE20:PAKB	56924	pXN-HA-Flag	N	PM	N			Supported
406	5B10	ABL1	TK:Abl:	25	pLX304/CMV/Flag	C	C	N			Enhanced
407	5B11	ABL2	TK:Abl:	27	pXN-HA-Flag	N	CS	N			Supported
426	5D6	EPHA2	TK:Eph:	1969	pLX304/CMV/Flag	C	V	PM			Supported
438	5E6	PTK2	TK:FAK:	5747	pLX304/CMV/Flag	C	C	PM			Supported
461	5G5	KIT	TK:PDGFR:	3815	pXN-HA-Flag	N	C	PM			Supported
463	5G7	PDGFRB	TK:PDGFR:	5159	pXN-HA-Flag	N	C	V			Supported
469	5H1	FRK	TK:Src:Frk	2444	pLX304/CMV/Flag	C	PM	N			Supported
471	5H3	FYN	TK:Src:SrcA	2534	pXN-HA-Flag	N	C	PM			Enhanced
485	6A5	TEC	TK:Tec:	7006	pXN-HA-Flag	N	V	PM			Supported
496	6B4	IRAK1	TKL:IRAK:	3654	pcDNA-C-Myc	C	PM	C			Supported
507	6C3	ILK	TKL:MLK:ILK	3611	pLX304/CMV/Flag	C	C	PM			Supported
512	6C8	MAP3K11	TKL:MLK:MLK	4296	pcDNA-C-Myc	C	MI	CT	C		Supported
515	6C11	MAP3K20	TKL:MLK:ZAK	51776	pLX304/CMV/Flag	C	N	C			Supported
520	6D4	RAF1	TKL:RAF:RAF	5894	pXN-HA-Flag	N	C	N			Supported
535	6E7	AMHR2	TKL:STKR:STKR2	269	pXC-Flag	C	ER	V			Supported
537	6E9	TGFBR2	TKL:STKR:STKR2	7048	pXN-HA-Flag	N	C	PM			Supported
