# Supplementary material for: A subcellular map of the human kinome
Source: eLife. 2021 May 14;10:e64943. doi: 10.7554/eLife.64943 (PMC8175086; doi:10.7554/eLife.64943)
Supplement: Supplementary file 6. [file elife-64943-supp6.xlsx]

## Sheet: KA not match COMP
#	position	Official Symbol	Classification	Gene ID	Vector	Tag position	KA specific localization	COMPARTMENTS											HPA
								5 STAR 1	5 STAR 2	5 STAR 3	5 STAR 4	5 STAR 5	5 STAR 6	5 STAR 7	4 STAR 1	4 STAR 2	4 STAR 3	4 STAR 4	Main 1	Main 2	Main 3	Evidence
29	1C5	PRKACB	AGC:PKA:	5567	pLX304/CMV/Flag	C	C	CT							N	PM	Ex S		C			Approved
89	1H5	PDK1	Atypical:PDHK:PDHK	5163	pLX304/CMV/Flag	C	MI	N	C	PM									MI	N		Supported
148	2E4	MAPKAPK3	CAMK:MAPKAPK:MK2	7867	pLX304/CMV/Flag	C	N								C				N			Supported
162	2F6	PRKD1	CAMK:PKD:	5587	pcDNA-C-Myc	C	PM	GL							V				PM			Supported
171	2G3	TRIB2	CAMK:Trbl:	28951	pLX304/CMV/Flag	C	N								C				N	C		Approved
173	2G5	KALRN	CAMK:Trio:	8997	pXN-HA-Flag	N	C								CS	Ex S			N	C		Approved
182	2H2	CSNK1A1	CK1:CK1:CK1-A	1452	pXN-HA-Flag	N	C	CT	N										C			Supported
236	3D8	GSK3A	CMGC:GSK:	2931	pLX304/CMV/Flag	C	C								PM				C			Approved
274	3G10	CAMKK2	Other:CAMKK:CAMKK-Meta	10645	pcDNA3-N-Flag	N	C								N				C			Supported
298	4A10	NEK7	Other:NEK:NEK6	140609	pLX304/CMV/Flag	C	N								C				N			Supported
310	4B10	NRBP1	Other:NRBP:	29959	pcDNA-C-Flag	C	C								N				C			Supported
367	4G7	OXSR1	STE:STE20:FRAY	9943	pLX304/CMV/Flag	C	C	Ex S											C			Enhanced
397	5B1	MAP2K1	STE:STE7:MEK1	5604	pLX304/CMV/Flag	C	C	PM	N	ER	GL	V	MI						PM	C		Enhanced
454	5F10	LMTK2	TK:Lmr:	22853	pcDNA-C-Flag	C	N	PM	GL	V	C								N	CT		Approved
456	5F12	MET	TK:Met:	4233	pXN-HA-Flag	N	C	PM	Ex S										PM	C		Supported
457	5G1	MST1R	TK:Met:	4486	pLX304/CMV/Flag	C	C	PM											C			Approved
470	5H2	FGR	TK:Src:SrcA	2268	pLX304/CMV/Flag	C	PM								C	Ex S			PM			Approved
501	6B9	LIMK2	TKL:LISK:LIMK	3985	pLX304/CMV/Flag	C	C	CS											N	C		Supported
514	6C10	MAP3K7	TKL:MLK:TAK1	6885	pXC-Flag	C	C								N	V			C			Supported
522	6D6	RIPK1	TKL:RIPK:	8737	pLX304/CMV/Flag	C	C								V	MI			C	PM		Enhanced
128	2C8	MELK	CAMK:CAMKL:MELK	9833	pEBG2T-GST-HA	N	C	PM											No data
181	2H1	TSSK6	CAMK:TSSK:	83983	pXN-HA-Flag	N	C								N				No data
188	2H8	CSNK1G3	CK1:CK1:CK1-G	1456	pcDNA-C-Myc	C	PM	C											No data
269	3G5	AURKC	Other:Aur:	6795	pLX304/CMV/Flag	C	C	N	CS										No data
285	3H9	MOS	Other:MOS:	4342	pXN-HA-Flag	N	N								C				No data
315	4C3	PAN3	Other:PAN3:	255967	pT7-EGFP-C1-HsPAN3	N	V								C				No data
322	4C10	PLK3	Other:PLK:PLK2	1263	pcDNA-C-Myc	C	PM	CT	C	N	GL								No data
347	4E11	WNK4	Other:WNK:	65266	pcDNA-C-Myc	C	AG								PM				No data
350	4F2	FAM20A	PKL:FJ:	54757	pcDNA-C-Flag	C	PM	Ex S							ER				No data
356	4F8	GUCY2F	RGC:RGC:	2986	pcDNA-C-Myc	C	ER								N				No data
358	4F10	NPR2	RGC:RGC:	4882	pcDNA-C-Flag	C	ER	PM											No data
414	5C6	TYRO3	TK:Axl:	7301	pLX304/CMV/Flag	C	V	PM							N	ER			No data
415	5C7	PTK7	TK:CCK4:	5754	pcDNA-C-Myc	C	ER	PM											No data
423	5D3	ERBB4	TK:EGFR:	2066	pLX304/CMV/Flag	C	GL	N	MI	PM					C				No data
425	5D5	EPHA10	TK:Eph:	284656	pcDNA-C-Myc	C	GL	PM											No data
432	5D12	EPHA8	TK:Eph:	2046	pLX304/CMV/Flag	C	ER								PM				No data
458	5G2	MUSK	TK:Musk:	4593	pXC-Flag	C	V	PM											No data
484	6A4	ITK	TK:Tec:	3702	pXN-HA-Flag	N	PM								N	C			No data
521	6D5	ANKK1	TKL:RIPK:	255239	pXN-HA-Flag	N	C	N											No data
525	6D9	RIPK4	TKL:RIPK:	54101	pXN-HA-Flag	N	V								C				No data
531	6E3	BMPR1B	TKL:STKR:STKR1	658	pXN-HA-Flag	N	ER	PM											No data

## Sheet: KA not match HPA
#	position	Official Symbol	Classification	Gene ID	Vector	Tag position	KA specific localization	COMPARTMENTS											HPA
								5 STAR 1	5 STAR 2	5 STAR 3	5 STAR 4	5 STAR 5	5 STAR 6	5 STAR 7	4 STAR 1	4 STAR 2	4 STAR 3	4 STAR 4	Main 1	Main 2	Main 3	Evidence
1	1A1	AKT1	AGC:Akt:	207	pLX304/CMV/Flag	C	PM	N	C	PM	V								N			Supported
2	1A2	AKT2	AGC:Akt:	208	pXN-HA-Flag	N	PM	N							C	PM			N	V	C	Supported
5	1A5	CDC42BPA	AGC:DMPK:GEK	8476	pcDNA-C-Myc	C	PM	CS							PM	Ex S			CS			Approved
11	1A11	GRK2	AGC:GRK:BARK	156	pLX304/CMV/Flag	C	C								C	PM			V			Approved
12	1A12	GRK3	AGC:GRK:BARK	157	pXN-HA-Flag	N	C								C	PM			N			Approved
14	1B2	GRK4	AGC:GRK:GRK	2868	pXN-HA-Flag	N	C	C	PM										V			Supported
16	1B4	GRK6	AGC:GRK:GRK	2870	pcDNA-C-Myc	C	PM	PM											MI			Approved
23	1B11	LATS1	AGC:NDR:LATS	9113	pcDNA3-HA-Lats1	N	C	C	CS										V			Approved
27	1C3	PDPK1	AGC:PDK1:	5170	pLX304/CMV/Flag	C	C	N	C	PM									V			Approved
31	1C7	PRKX	AGC:PKA:	5613	pXN-HA-Flag	N	C	N	C										N			Supported
34	1C10	PRKCB	AGC:PKC:PKCa	5579	pLX304/CMV/Flag	C	C	N	C	PM					Ex S				N			Supported
36	1C12	PRKCD	AGC:PKC:PKCd	5580	pXN-HA-Flag	N	C	C	PM	N	ER				Ex S				ER	GL		Supported
37	1D1	PRKCQ	AGC:PKC:PKCd	5588	pXN-HA-Flag	N	PM	C	PM										CT			Enhanced
40	1D4	PRKCI	AGC:PKC:PKCi	5584	pXN-HA-Flag	N	PM	C	N						PM	Ex S			C			Supported
44	1D8	PKN1	AGC:PKN:	5585	pXN-HA-Flag	N	C	CS	C	V	N								N			Supported
45	1D9	PKN2	AGC:PKN:	5586	pXN-HA-Flag	N	C	N	C	PM	CS								N	CS		Enhanced
48	1D12	RPS6KA5	AGC:RSK:MSK CAMK:RSKb:MSKb	9252	pLX304/CMV/Flag	C	C	N	C										N			Enhanced
53	1E5	RPS6KA3	AGC:RSK:RSKp90 CAMK:RSKb:RSKb	6197	pLX304/CMV/Flag	C	C								N	C			N			Approved
58	1E10	SGK1	AGC:SGK:	6446	N-HA-S422D	N	C	ER	N	PM	C	MI							N			Enhanced
59	1E11	SGK2	AGC:SGK:	10110	pLX304/CMV/Flag	C	C	C											N			Supported
74	1G2	EEF2K	Atypical:Alpha:eEF2K	29904	pLX304/CMV/Flag	C	C								C				N			Approved
77	1G5	ABR	Atypical:BCR:	29	pXN-HA-Flag	N	PM								C	PM			C			Approved
113	2B5	CAMK2A	CAMK:CAMK2:	815	pLX304/CMV/Flag	C	C	PM							N	C	V		PM			Approved
114	2B6	CAMK2B	CAMK:CAMK2:	816	pLX304/CMV/Flag	C	C								C	N	V		PM			Supported
115	2B7	CAMK2D	CAMK:CAMK2:	817	pLX304/CMV/Flag	C	C								PM	V	N		PM			Approved
116	2B8	CAMK2G	CAMK:CAMK2:	818	pXN-HA-Flag	N	N								N	V	C		PM			Approved
138	2D6	CASK	CAMK:CASK:	8573	pLX304/CMV/Flag	C	C								N	C	PM		N			Approved
139	2D7	DAPK1	CAMK:DAPK:DAPK	1612	pLX304/CMV/Flag	C	C	C	CS	PM									CT			Approved
140	2D8	DAPK2	CAMK:DAPK:DAPK	23604	pLX304/CMV/Flag	C	C	C											V	GL		Supported
143	2D11	STK17B	CAMK:DAPK:DRAK	9262	pXN-HA-Flag	N	N	N											PM	C		Uncertain
147	2E3	MAPKAPK2	CAMK:MAPKAPK:MK2	9261	pXN-HA-Flag	N	C	N	C						Ex S				N			Supported
150	2E6	MKNK1	CAMK:MAPKAPK:MNK	8569	pLX304/CMV/Flag	C	C	N	C										N			Supported
151	2E7	MKNK2	CAMK:MAPKAPK:MNK	2872	pXN-HA-Flag	N	C	C	N										N			Supported
154	2E10	MYLK3	CAMK:MLCK:	91807	pLX304/CMV/Flag	C	C	C											N			Approved
159	2F3	PIM1	CAMK:PIM:	5292	pXN-HA-Flag	N	N	PM	N	C									C			Supported
163	2F7	PRKD2	CAMK:PKD:	25865	pLX304/CMV/Flag	C	C								N	C			N			Supported
170	2G2	TRIB1	CAMK:Trbl:	10221	pXN-HA-Flag	N	N								N	C			PM	C		Approved
184	2H4	CSNK1D	CK1:CK1:CK1-D	1453	pcDNA-C-Flag	C	C	C	CS	PM	CT				N	ER	GL		N			Approved
202	3A10	CDK6	CMGC:CDK:CDK4	1021	pLX304/CMV/Flag	C	C	CT							N	C			N			Supported
203	3A11	CDK5	CMGC:CDK:CDK5	1020	pLX304/CMV/Flag	C	C	N							PM	C			PM			Supported
226	3C10	DYRK1A	CMGC:DYRK:DYRK1	1859	HA-DYRK1A	N	N	C	N										C			Approved
229	3D1	DYRK3	CMGC:DYRK:DYRK2	8444	pXN-HA-Flag	N	C	N	C										N			Supported
231	3D3	HIPK1	CMGC:DYRK:HIPK	204851	pXN-HA-Flag	N	C	N	C										N	CT	GL	Approved
237	3D9	GSK3B	CMGC:GSK:	2932	pXN-HA-Flag	N	C	N	C	CT	PM								N			Supported
239	3D11	MAPK3	CMGC:MAPK:ERK1	5595	pcDNA-C-Flag	C	C	PM	MI	V	C	CS							N			Approved
240	3D12	MAPK4	CMGC:MAPK:ERK3	5596	pXN-HA-Flag	N	C								N	C			N	GL		Approved
241	3E1	MAPK6	CMGC:MAPK:ERK3	5597	pXN-Myc-His	N	N								N	C			C			Enhanced
242	3E2	MAPK7	CMGC:MAPK:ERK5	5598	pXN-HA-Flag	N	C	N	C										N			Enhanced
249	3E9	MAPK12	CMGC:MAPK:p38	6300	pLX304/CMV/Flag	C	C	MI	N	C									N			Approved
250	3E10	MAPK13	CMGC:MAPK:p38	5603	pLX304/CMV/Flag	C	C								C				N			Approved
251	3E11	MAPK14	CMGC:MAPK:p38	1432	pLX304/CMV/Flag	C	C								N	C	Ex S		N			Supported
263	3F11	NME6	NDK:NDK:	10201	pLX304/CMV/Flag	C	MI	MI											V			Approved
264	3F12	NME7	NDK:NDK:	29922	pLX304/CMV/Flag	C	C	CT							C				MI			Approved
276	3G12	DSTYK	Other:Dusty:	25778	pLX304/CMV/Flag	C	C	C	PM										N	CS		Uncertain
300	4A12	NEK9	Other:NEK:NEK9	91754	pXN-HA-Flag	N	C								C				MI			Approved
326	4D2	SCYL3	Other:SCY1:	57147	pLX304/CMV/Flag	C	GL	C	GL	PM									CS			Uncertain
330	4D6	TBCK	Other:TBCK:	93627	pXN-HA-Flag	N	C	C	CS										N			Approved
333	4D9	PBK	Other:TOPK:	55872	pLX304/CMV/Flag	C	N								N				C			Approved
340	4E4	PIK3R4	Other:VPS15:	30849	pXN-HA-Flag	N	C	C	V						CS				V			Approved
341	4E5	PKMYT1	Other:WEE:Myt1	9088	pXN-HA-Flag	N	ER								ER	GL	C		GL			Supported
348	4E12	FAM198A	PKL:FJ:	729085	pXN-HA-Flag	N	GL								ER	GL	Ex S		V			Supported
365	4G5	MAP3K3	STE:STE11:MEKK2	4215	pCMV-3XFlag-MEKK3	N	C								C				N			Approved
376	4H4	TNIK	STE:STE20:MSN	23043	HA-TNIK-PGW1	N	C	N	C	CS	PM	V							N			Supported
377	4H5	STK3	STE:STE20:MST	6788	pLX304/CMV/Flag	C	C	PM							C				CS			Approved
378	4H6	STK4	STE:STE20:MST	58231	Flag-STK4	N	C	N	C										N			Supported
382	4H10	PAK2	STE:STE20:PAKA	5062	pXN-HA-Flag	N	C	C	N	PM									N	V		Approved
391	5A7	TAOK1	STE:STE20:TAO	57551	pRK5-N-Myc	N	C								C	Ex S			V			Approved
401	5B5	MAP2K4	STE:STE7:MEK4	6416	pXN-HA-Flag	N	C								C				N			Approved
406	5B10	ABL1	TK:Abl:	25	pLX304/CMV/Flag	C	C	C	CS	N					MI				N			Enhanced
407	5B11	ABL2	TK:Abl:	27	pXN-HA-Flag	N	CS	CS							C				N			Supported
408	5B12	TNK1	TK:Ack:	8711	pcDNA-C-Flag	C	C	C	PM										PM			Approved
409	5C1	TNK2	TK:Ack:	10188	pXC-Flag	C	V	N	C	PM	V								C			Approved
417	5C9	MATK	TK:Csk:	4145	pLX304/CMV/Flag	C	C								C				CS			Approved
422	5D2	ERBB3	TK:EGFR:	2065	pLX304/CMV/Flag	C	PM	PM	Ex S										CS			Approved
437	5E5	EPHB6	TK:Eph:	2051	pXN-HA-Flag	N	C	PM							C				N			Approved
438	5E6	PTK2	TK:FAK:	5747	pLX304/CMV/Flag	C	C	CS	N	C	PM								PM			Supported
446	5F2	IGF1R	TK:InsR:	3480	pcDNA-C-Myc	C	PM	PM											V			Approved
452	5F8	TYK2	TK:Jak: TK:JakB:	7297	pLX304/CMV/Flag	C	N								N	C	Ex S		C			Approved
461	5G5	KIT	TK:PDGFR:	3815	pXN-HA-Flag	N	C	PM	C						Ex S				PM			Supported
463	5G7	PDGFRB	TK:PDGFR:	5159	pXN-HA-Flag	N	C	PM							N	C			V			Supported
467	5G11	RYK	TK:Ryk:	6259	pXN-HA-Flag	N	C	PM							C	N			GL			Approved
471	5H3	FYN	TK:Src:SrcA	2534	pXN-HA-Flag	N	C	PM	C	N					V				PM			Enhanced
476	5H8	LCK	TK:Src:SrcB	3932	pXN-HA-Flag	N	C	PM							C	Ex S			GL			Approved
491	6A11	NTRK2	TK:Trk:	4915	pEGFP-N1-TrkB	C	GL	PM							V	GL			C			Approved
496	6B4	IRAK1	TKL:IRAK:	3654	pcDNA-C-Myc	C	PM								PM	V			C			Supported
497	6B5	IRAK2	TKL:IRAK:	3656	pLX304/CMV/Flag	C	C								C	V			V			Approved
520	6D4	RAF1	TKL:RAF:RAF	5894	pXN-HA-Flag	N	C	PM	N	C	MI				GL				N			Supported
527	6D11	ACVR1B	TKL:STKR:STKR1	91	pcDNA-C-Myc	C	PM								PM				C			Approved
530	6E2	BMPR1A	TKL:STKR:STKR1	657	pXC-Flag	C	PM								PM				C			Approved
537	6E9	TGFBR2	TKL:STKR:STKR2	7048	pXN-HA-Flag	N	C	PM							C				PM			Supported
3	1A3	AKT3	AGC:Akt:	10000	pXN-HA-Flag	N	PM	No data											C			Supported
18	1B6	MAST1	AGC:MAST:MAST	56527	pXN-HA-Flag	N	C	No data											V			Approved
41	1D5	PRKCZ	AGC:PKC:PKCi	5590	pLX304/CMV/Flag	C	PM	No data											C			Supported
56	1E8	RPS6KL1	AGC:RSKL:	83694	pcDNA-C-Flag	C	C	No data											N			Approved
62	1F2	STK32B	AGC:YANK:	55351	pXN-HA-Flag	N	C	No data											CS			Approved
66	1F6	ADCK1	Atypical:ABC1:ABC1-B	57143	pXN-HA-Flag	N	MI	No data											N			Approved
67	1F7	ADCK2	Atypical:ABC1:ABC1-C	90956	pXC-Flag	C	MI	No data											CT	C		Uncertain
85	1H1	FASTK	Atypical:FAST:	10922	pLX304/CMV/Flag	C	N	No data											MI			Approved
129	2C9	NIM1K	CAMK:CAMKL:NIM1	167359	pXN-HA-Flag	N	PM	No data											C			Approved
135	2D3	SIK3	CAMK:CAMKL:QIK	23387	pXN-HA-Flag	N	C	No data											N			Enhanced
137	2D5	CAMKV	CAMK:CAMK-Unique:	79012	pLX304/CMV/Flag	C	PM	No data											N			Approved
160	2F4	PIM2	CAMK:PIM:	11040	pLX304/CMV/Flag	C	N	No data											C			Approved
166	2F10	PSKH2	CAMK:PSK:	85481	pXN-HA-Flag	N	C	No data											N			Approved
168	2F12	STK40	CAMK:SgK495:	83931	pLX304/CMV/Flag	C	N	No data											C			Supported
179	2G11	TSSK3	CAMK:TSSK:	81629	pXC-Flag	C	AG	No data											N			Approved
194	3A2	CDK20	CMGC:CDK:CCRK	23552	pLX304/CMV/Flag	C	C	No data											N			Supported
212	3B8	CDK18	CMGC:CDK:PCTAIRE	5129	pXN-HA-Flag	N	C	No data											CS			Approved
215	3B11	CDKL1	CMGC:CDKL:	8814	pcDNA-C-Flag	C	C	No data											N	V		Enhanced
216	3B12	CDKL2	CMGC:CDKL:	8999	pXN-HA-Flag	N	C	No data											N	CT		Supported
225	3C9	CLK4	CMGC:CLK:	57396	pXN-HA-Flag	N	N	No data											CS			Approved
230	3D2	DYRK4	CMGC:DYRK:DYRK2	8798	pXN-HA-Flag	N	C	No data											V			Enhanced
233	3D5	HIPK3	CMGC:DYRK:HIPK	10114	pXN-HA-Flag	N	N	No data											C			Supported
287	3H11	BMP2K	Other:NAK:BIKE	55589	pXN-HA-Flag	N	V	No data											N			Supported
289	4A1	STK16	Other:NAK:MPSK	8576	pLX304/CMV/Flag	C	GL	No data											C			Approved
293	4A5	NEK10	Other:NEK:NEK10	152110	pXC-Flag	C	C	No data											V			Approved
313	4C1	POMK	Other:Other-Unique:	84197	pLX304/CMV/Flag	C	ER	No data											N			Approved
317	4C5	EIF2AK1	Other:PEK:HRI	27102	pXN-HA-Flag	N	C	No data											N			Supported
353	4F5	FJX1	PKL:FJ:	24147	pXN-HA-Flag	N	GL	No data											V			Approved
354	4F6	GUCY2C	RGC:RGC:	2984	pXN-HA-Flag	N	C	No data											V			Uncertain
359	4F11	MAP3K15	STE:STE11:ASK	389840	pcDNA-C-Flag	C	C	No data											V			Approved
368	4G8	STK39	STE:STE20:FRAY	27347	pXN-HA-Flag	N	C	No data											N			Supported
371	4G11	MAP4K3	STE:STE20:KHS	8491	pcDNA-Flag	N	ER	No data											CT			Approved
393	5A9	TAOK3	STE:STE20:TAO	51347	pLX304/CMV/Flag	C	C	No data											MI			Uncertain
402	5B6	MAP2K5	STE:STE7:MEK5	5607	pLX304/CMV/Flag	C	C	No data											N	CS		Approved
507	6C3	ILK	TKL:MLK:ILK	3611	pLX304/CMV/Flag	C	C	No data											PM			Supported
513	6C9	MAP3K9	TKL:MLK:MLK	4293	pXN-Myc-His	N	C	No data											N			Approved
518	6D2	ARAF	TKL:RAF:RAF	369	pXN-HA-Flag	N	PM	No data											N			Approved
519	6D3	BRAF	TKL:RAF:RAF	673	pXN-HA-Flag	N	C	No data											V			Approved

## Sheet: KA match neither  COMP nor HPA
#	position	Official Symbol	Classification	Gene ID	Vector	Tag position	KA specific localization	COMPARTMENTS											HPA
								5 STAR 1	5 STAR 2	5 STAR 3	5 STAR 4	5 STAR 5	5 STAR 6	5 STAR 7	4 STAR 1	4 STAR 2	4 STAR 3	4 STAR 4	Main 1	Main 2	Main 3	Evidence
4	1A4	CIT	AGC:DMPK:CRIK	11113	pcDNA-C-Myc	C	V								C	PM			C			Approved
7	1A7	CDC42BPG	AGC:DMPK:GEK	55561	pXN-HA-Flag	N	V								PM				C			Supported
24	1B12	LATS2	AGC:NDR:LATS	26524	pcDNA3-HA-Lats2	N	V	N	C	CS									CT	C		Supported
26	1C2	STK38L	AGC:NDR:NDR	23012	pcDNA-C-Myc	C	N	C	CS	PM									C			Approved
28	1C4	PRKACA	AGC:PKA:	5566	pLX304/CMV/Flag	C	GL	N	C	PM	CS								C			Approved
39	1D3	PRKCH	AGC:PKC:PKCh	5583	pLX304/CMV/Flag	C	MI	C	PM						Ex S				C			Approved
46	1D10	PKN3	AGC:PKN:	29941	pcDNA-C-Flag	C	PM								N	GL			V			Approved
52	1E4	RPS6KA2	AGC:RSK:RSKp90 CAMK:RSKb:RSKb	6196	pcDNA-C-Flag	C	PM	N	C										N			Supported
84	1G12	CERT1	Atypical:Col4A3BP:	10087	pLX304/CMV/Flag	C	C	GL							ER				ER			Enhanced
102	2A6	TAF1	Atypical:TAF1:	6872	pXN-HA-Flag	N	C								N				N			Enhanced
119	2B11	BRSK1	CAMK:CAMKL:BRSK	84446	pEBG2T-GST-HA	N	PM	C	N						CT				N			Supported
120	2B12	BRSK2	CAMK:CAMKL:BRSK	9024	pLX304/CMV/Flag	C	PM	C	ER	CT									GL			Approved
136	2D4	SNRK	CAMK:CAMKL:SNRK	54861	pXN-HA-Flag	N	C	N											V	PM		Approved
176	2G8	SPEG	CAMK:Trio: CAMK:Trio:	10290	pXN-HA-Flag	N	C	N											V			Approved
186	2H6	CSNK1G1	CK1:CK1:CK1-G	53944	CSNK1G1-Myc	C	PM	C											C			Supported
199	3A7	CDK2	CMGC:CDK:CDK2	1017	pLX304/CMV/Flag	C	C	N	CT	V									N			Enhanced
247	3E7	NLK	CMGC:MAPK:nmo	51701	pCMV-NLK-Flag	C	PM								N	C			N			Supported
248	3E8	MAPK11	CMGC:MAPK:p38	5600	pXN-HA-Flag	N	PM								N	C			MI			Approved
254	3F2	MOK	CMGC:RCK:MOK	5891	pXN-HA-Flag	N	C	N											ER			Supported
260	3F8	NME3	NDK:NDK:	4832	pcDNA-C-Myc	C	MI								C				N			Approved
270	3G6	BUB1	Other:BUB:	699	pXN-HA-Flag	N	C	N											N			Supported
291	4A3	NEK3	Other:NEK:NEK1	4752	pXN-HA-Flag	N	C	N											CS			Approved
294	4A6	NEK11	Other:NEK:NEK11	79858	pXN-HA-Flag	N	C	N											N			Supported
349	4F1	FAM198B	PKL:FJ:	51313	pXN-HA-Flag	N	ER								GL				N	GL		Approved
370	4G10	MAP4K2	STE:STE20:KHS	5871	pcDNA-C-Myc	C	PM								GL				V			Approved
384	4H12	PAK4	STE:STE20:PAKB	10298	pLX304/CMV/Flag	C	C								GL	PM			PM			Supported
385	5A1	PAK6	STE:STE20:PAKB	56924	pXN-HA-Flag	N	PM	N	C										N			Supported
386	5A2	PAK5	STE:STE20:PAKB	57144	pLX304/CMV/Flag	C	V	N	C	MI									N			Approved
388	5A4	STK10	STE:STE20:SLK	6793	pXC-Flag	C	C	PM							Ex S				N	PM		Approved
426	5D6	EPHA2	TK:Eph:	1969	pLX304/CMV/Flag	C	V	PM											PM			Supported
430	5D10	EPHA6	TK:Eph:	13840	pcDNA-C-Myc	C	GL								PM				N			Enhanced
464	5G8	RET	TK:Ret:	5979	pcDNA-C-3XFlag	C	ER	PM	V										GL	C		Approved
465	5G9	ROR1	TK:Ror:	4919	pLX304/CMV/Flag	C	ER	PM							C				CS			Approved
468	5G12	ROS1	TK:Sev:	6098	pXN-HA-Flag	N	C	PM											V			Approved
469	5H1	FRK	TK:Src:Frk	2444	pLX304/CMV/Flag	C	PM	Ex S											N			Supported
474	5H6	BLK	TK:Src:SrcB	640	pLX304/CMV/Flag	C	PM								C				N			Approved
485	6A5	TEC	TK:Tec:	7006	pXN-HA-Flag	N	V	C	CS	PM									PM			Supported
489	6A9	STYK1	TK:TK-Unique:	55359	pLX304/CMV/Flag	C	AG								PM				PM			Approved
508	6C4	MAP3K12	TKL:MLK:LZK	7786	pcDNA-C-Myc	C	GL								C	PM			N	PM		Approved
509	6C5	MAP3K13	TKL:MLK:LZK	9175	pcDNA-C-Myc	C	GL	PM											CT			Approved
512	6C8	MAP3K11	TKL:MLK:MLK	4296	pcDNA-C-Myc	C	MI	CT	CS						PM				CT	C		Supported
515	6C11	MAP3K20	TKL:MLK:ZAK	51776	pLX304/CMV/Flag	C	N								C				C			Supported
533	6E5	ACVR2A	TKL:STKR:STKR2	92	pXN-HA-Flag	N	ER	PM							C				C			Approved
535	6E7	AMHR2	TKL:STKR:STKR2	269	pXC-Flag	C	ER	PM							C				V			Supported

## Sheet: Prediction by PSORT
#	position	Official Symbol	Classification	Gene ID	Vector	Tag position	KA specific localization	PSORT predict 1	PSORT predict 2	PSORT predict 3	PSORT predicted(Y/N)
128	2C8	MELK	CAMK:CAMKL:MELK	9833	pEBG2T-GST-HA	N	C	C	MI		Y
181	2H1	TSSK6	CAMK:TSSK:	83983	pXN-HA-Flag	N	C	N	C		Y
188	2H8	CSNK1G3	CK1:CK1:CK1-G	1456	pcDNA-C-Myc	C	PM	C	N	V	N
269	3G5	AURKC	Other:Aur:	6795	pLX304/CMV/Flag	C	C	C	N		Y
285	3H9	MOS	Other:MOS:	4342	pXN-HA-Flag	N	N	N	C	V	Y
315	4C3	PAN3	Other:PAN3:	255967	pT7-EGFP-C1-HsPAN3	N	V	N	C		N
322	4C10	PLK3	Other:PLK:PLK2	1263	pcDNA-C-Myc	C	PM	N	C	PM	Y
347	4E11	WNK4	Other:WNK:	65266	pcDNA-C-Myc	C	AG	N	C	V	N
350	4F2	FAM20A	PKL:FJ:	54757	pcDNA-C-Flag	C	PM	Ex S	ER		N
356	4F8	GUCY2F	RGC:RGC:	2986	pcDNA-C-Myc	C	ER	Ex S	PM		N
358	4F10	NPR2	RGC:RGC:	4882	pcDNA-C-Flag	C	ER	ER	PM		Y
414	5C6	TYRO3	TK:Axl:	7301	pLX304/CMV/Flag	C	V	PM	ER	GL	N
415	5C7	PTK7	TK:CCK4:	5754	pcDNA-C-Myc	C	ER	Ex S	PM	ER	Y
423	5D3	ERBB4	TK:EGFR:	2066	pLX304/CMV/Flag	C	GL	Ex S	V	C	N
425	5D5	EPHA10	TK:Eph:	284656	pcDNA-C-Myc	C	GL	Ex S	PM		N
432	5D12	EPHA8	TK:Eph:	2046	pLX304/CMV/Flag	C	ER	PM	Ex S		N
458	5G2	MUSK	TK:Musk:	4593	pXC-Flag	C	V	PM	ER		N
484	6A4	ITK	TK:Tec:	3702	pXN-HA-Flag	N	PM	C	N		N
521	6D5	ANKK1	TKL:RIPK:	255239	pXN-HA-Flag	N	C	N	C		Y
525	6D9	RIPK4	TKL:RIPK:	54101	pXN-HA-Flag	N	V	N	C		N
531	6E3	BMPR1B	TKL:STKR:STKR1	658	pXN-HA-Flag	N	ER	MI	C	N	N
3	1A3	AKT3	AGC:Akt:	10000	pXN-HA-Flag	N	PM	C	N		N
18	1B6	MAST1	AGC:MAST:MAST	56527	pXN-HA-Flag	N	C	N	MI		N
41	1D5	PRKCZ	AGC:PKC:PKCi	5590	pLX304/CMV/Flag	C	PM	C	N		N
56	1E8	RPS6KL1	AGC:RSKL:	83694	pcDNA-C-Flag	C	C	N	C		Y
62	1F2	STK32B	AGC:YANK:	55351	pXN-HA-Flag	N	C	MI	C	N	Y
66	1F6	ADCK1	Atypical:ABC1:ABC1-B	57143	pXN-HA-Flag	N	MI	MI			Y
67	1F7	ADCK2	Atypical:ABC1:ABC1-C	90956	pXC-Flag	C	MI	PM			N
85	1H1	FASTK	Atypical:FAST:	10922	pLX304/CMV/Flag	C	N	N	C	MI	Y
129	2C9	NIM1K	CAMK:CAMKL:NIM1	167359	pXN-HA-Flag	N	PM	C	MI		N
135	2D3	SIK3	CAMK:CAMKL:QIK	23387	pXN-HA-Flag	N	C	C	N		Y
137	2D5	CAMKV	CAMK:CAMK-Unique:	79012	pLX304/CMV/Flag	C	PM	N	C	MI	N
160	2F4	PIM2	CAMK:PIM:	11040	pLX304/CMV/Flag	C	N	C	N		Y
166	2F10	PSKH2	CAMK:PSK:	85481	pXN-HA-Flag	N	C	C	N		Y
168	2F12	STK40	CAMK:SgK495:	83931	pLX304/CMV/Flag	C	N	C	MI	N	Y
179	2G11	TSSK3	CAMK:TSSK:	81629	pXC-Flag	C	AG	C	N	Ex S	N
194	3A2	CDK20	CMGC:CDK:CCRK	23552	pLX304/CMV/Flag	C	C	C	N	MI	Y
212	3B8	CDK18	CMGC:CDK:PCTAIRE	5129	pXN-HA-Flag	N	C	N	MI	C	Y
215	3B11	CDKL1	CMGC:CDKL:	8814	pcDNA-C-Flag	C	C	C	N	MI	Y
216	3B12	CDKL2	CMGC:CDKL:	8999	pXN-HA-Flag	N	C	C	N	MI	Y
225	3C9	CLK4	CMGC:CLK:	57396	pXN-HA-Flag	N	N	N	C		Y
230	3D2	DYRK4	CMGC:DYRK:DYRK2	8798	pXN-HA-Flag	N	C	N	C		Y
233	3D5	HIPK3	CMGC:DYRK:HIPK	10114	pXN-HA-Flag	N	N	N	C		Y
287	3H11	BMP2K	Other:NAK:BIKE	55589	pXN-HA-Flag	N	V	N	C		N
289	4A1	STK16	Other:NAK:MPSK	8576	pLX304/CMV/Flag	C	GL	C	N	V	N
293	4A5	NEK10	Other:NEK:NEK10	152110	pXC-Flag	C	C	C	N		Y
313	4C1	POMK	Other:Other-Unique:	84197	pLX304/CMV/Flag	C	ER	Ex S	V		N
317	4C5	EIF2AK1	Other:PEK:HRI	27102	pXN-HA-Flag	N	C	N	C		Y
353	4F5	FJX1	PKL:FJ:	24147	pXN-HA-Flag	N	GL	Ex S			N
354	4F6	GUCY2C	RGC:RGC:	2984	pXN-HA-Flag	N	C	V	C	ER	Y
359	4F11	MAP3K15	STE:STE11:ASK	389840	pcDNA-C-Flag	C	C	N	C		Y
368	4G8	STK39	STE:STE20:FRAY	27347	pXN-HA-Flag	N	C	C	V	N	Y
371	4G11	MAP4K3	STE:STE20:KHS	8491	pcDNA-Flag	N	ER	C	N		N
393	5A9	TAOK3	STE:STE20:TAO	51347	pLX304/CMV/Flag	C	C	C	N	CS	Y
402	5B6	MAP2K5	STE:STE7:MEK5	5607	pLX304/CMV/Flag	C	C	C	MI	V	Y
507	6C3	ILK	TKL:MLK:ILK	3611	pLX304/CMV/Flag	C	C	C	N	PM	Y
513	6C9	MAP3K9	TKL:MLK:MLK	4293	pXN-Myc-His	N	C	PM	ER		N
518	6D2	ARAF	TKL:RAF:RAF	369	pXN-HA-Flag	N	PM	N	C		N
519	6D3	BRAF	TKL:RAF:RAF	673	pXN-HA-Flag	N	C	N	C		Y
4	1A4	CIT	AGC:DMPK:CRIK	11113	pcDNA-C-Myc	C	V	N	C		N
7	1A7	CDC42BPG	AGC:DMPK:GEK	55561	pXN-HA-Flag	N	V	N	Ex S	C	N
24	1B12	LATS2	AGC:NDR:LATS	26524	pcDNA3-HA-Lats2	N	V	N	C		N
26	1C2	STK38L	AGC:NDR:NDR	23012	pcDNA-C-Myc	C	N	C	N		Y
28	1C4	PRKACA	AGC:PKA:	5566	pLX304/CMV/Flag	C	GL	MI	N	C	N
39	1D3	PRKCH	AGC:PKC:PKCh	5583	pLX304/CMV/Flag	C	MI	MI	C	N	Y
46	1D10	PKN3	AGC:PKN:	29941	pcDNA-C-Flag	C	PM	N	C		N
52	1E4	RPS6KA2	AGC:RSK:RSKp90 CAMK:RSKb:RSKb	6196	pcDNA-C-Flag	C	PM	C	N	V	N
84	1G12	CERT1	Atypical:Col4A3BP:	10087	pLX304/CMV/Flag	C	C	N	C	MI	Y
102	2A6	TAF1	Atypical:TAF1:	6872	pXN-HA-Flag	N	C	N	C		Y
119	2B11	BRSK1	CAMK:CAMKL:BRSK	84446	pEBG2T-GST-HA	N	PM	N	C		N
120	2B12	BRSK2	CAMK:CAMKL:BRSK	9024	pLX304/CMV/Flag	C	PM	N	C	V	N
136	2D4	SNRK	CAMK:CAMKL:SNRK	54861	pXN-HA-Flag	N	C	C	N	V	Y
176	2G8	SPEG	CAMK:Trio: CAMK:Trio:	10290	pXN-HA-Flag	N	C	PM			N
186	2H6	CSNK1G1	CK1:CK1:CK1-G	53944	CSNK1G1-Myc	C	PM	N	C		N
199	3A7	CDK2	CMGC:CDK:CDK2	1017	pLX304/CMV/Flag	C	C	C	N		Y
247	3E7	NLK	CMGC:MAPK:nmo	51701	pCMV-NLK-Flag	C	PM	C	N	V	N
248	3E8	MAPK11	CMGC:MAPK:p38	5600	pXN-HA-Flag	N	PM	N	C		N
254	3F2	MOK	CMGC:RCK:MOK	5891	pXN-HA-Flag	N	C	N	C		Y
260	3F8	NME3	NDK:NDK:	4832	pcDNA-C-Myc	C	MI	Ex S			N
270	3G6	BUB1	Other:BUB:	699	pXN-HA-Flag	N	C	N	C		Y
291	4A3	NEK3	Other:NEK:NEK1	4752	pXN-HA-Flag	N	C	N	C		Y
294	4A6	NEK11	Other:NEK:NEK11	79858	pXN-HA-Flag	N	C	C	N	MI	Y
349	4F1	FAM198B	PKL:FJ:	51313	pXN-HA-Flag	N	ER	MI	C	N	N
370	4G10	MAP4K2	STE:STE20:KHS	5871	pcDNA-C-Myc	C	PM	C	N	V	N
384	4H12	PAK4	STE:STE20:PAKB	10298	pLX304/CMV/Flag	C	C	N	C	MI	Y
385	5A1	PAK6	STE:STE20:PAKB	56924	pXN-HA-Flag	N	PM	N	C		N
386	5A2	PAK5	STE:STE20:PAKB	57144	pLX304/CMV/Flag	C	V	N	C		N
388	5A4	STK10	STE:STE20:SLK	6793	pXC-Flag	C	C	MI	N		N
426	5D6	EPHA2	TK:Eph:	1969	pLX304/CMV/Flag	C	V	PM	V	ER	Y
430	5D10	EPHA6	TK:Eph:	13840	pcDNA-C-Myc	C	GL	MI	ER	N	N
464	5G8	RET	TK:Ret:	5979	pcDNA-C-3XFlag	C	ER	PM	Ex S	V	N
465	5G9	ROR1	TK:Ror:	4919	pLX304/CMV/Flag	C	ER	PM	Ex S	ER	Y
468	5G12	ROS1	TK:Sev:	6098	pXN-HA-Flag	N	C	PM			N
469	5H1	FRK	TK:Src:Frk	2444	pLX304/CMV/Flag	C	PM	C	N	MI	N
474	5H6	BLK	TK:Src:SrcB	640	pLX304/CMV/Flag	C	PM	MI	C	N	N
485	6A5	TEC	TK:Tec:	7006	pXN-HA-Flag	N	V	C	N		N
489	6A9	STYK1	TK:TK-Unique:	55359	pLX304/CMV/Flag	C	AG	C	N	MI	N
508	6C4	MAP3K12	TKL:MLK:LZK	7786	pcDNA-C-Myc	C	GL	N	C		N
509	6C5	MAP3K13	TKL:MLK:LZK	9175	pcDNA-C-Myc	C	GL	N	C		N
512	6C8	MAP3K11	TKL:MLK:MLK	4296	pcDNA-C-Myc	C	MI	No data			N
515	6C11	MAP3K20	TKL:MLK:ZAK	51776	pLX304/CMV/Flag	C	N	N	C		Y
533	6E5	ACVR2A	TKL:STKR:STKR2	92	pXN-HA-Flag	N	ER	PM			N
535	6E7	AMHR2	TKL:STKR:STKR2	269	pXC-Flag	C	ER	Ex S	PM	C	N

## Sheet: Prediction by YLoc
#	position	Official Symbol	Classification	Gene ID	Vector	Tag position	KA specific localization	YLoc predict 1	YLoc predict 2	YLoc predict 3	YLoc predicted (Y/N)
128	2C8	MELK	CAMK:CAMKL:MELK	9833	pEBG2T-GST-HA	N	C	C			Y
181	2H1	TSSK6	CAMK:TSSK:	83983	pXN-HA-Flag	N	C	C			Y
188	2H8	CSNK1G3	CK1:CK1:CK1-G	1456	pcDNA-C-Myc	C	PM	C			N
269	3G5	AURKC	Other:Aur:	6795	pLX304/CMV/Flag	C	C	C			Y
285	3H9	MOS	Other:MOS:	4342	pXN-HA-Flag	N	N	V			N
315	4C3	PAN3	Other:PAN3:	255967	pT7-EGFP-C1-HsPAN3	N	V	V	C		Y
322	4C10	PLK3	Other:PLK:PLK2	1263	pcDNA-C-Myc	C	PM	N			N
347	4E11	WNK4	Other:WNK:	65266	pcDNA-C-Myc	C	AG	N			N
350	4F2	FAM20A	PKL:FJ:	54757	pcDNA-C-Flag	C	PM	Ex S			N
356	4F8	GUCY2F	RGC:RGC:	2986	pcDNA-C-Myc	C	ER	PM			N
358	4F10	NPR2	RGC:RGC:	4882	pcDNA-C-Flag	C	ER	PM			N
414	5C6	TYRO3	TK:Axl:	7301	pLX304/CMV/Flag	C	V	PM			N
415	5C7	PTK7	TK:CCK4:	5754	pcDNA-C-Myc	C	ER	PM			N
423	5D3	ERBB4	TK:EGFR:	2066	pLX304/CMV/Flag	C	GL	PM			N
425	5D5	EPHA10	TK:Eph:	284656	pcDNA-C-Myc	C	GL	PM			N
432	5D12	EPHA8	TK:Eph:	2046	pLX304/CMV/Flag	C	ER	PM			N
458	5G2	MUSK	TK:Musk:	4593	pXC-Flag	C	V	PM			N
484	6A4	ITK	TK:Tec:	3702	pXN-HA-Flag	N	PM	C			N
521	6D5	ANKK1	TKL:RIPK:	255239	pXN-HA-Flag	N	C	C			Y
525	6D9	RIPK4	TKL:RIPK:	54101	pXN-HA-Flag	N	V	C			N
531	6E3	BMPR1B	TKL:STKR:STKR1	658	pXN-HA-Flag	N	ER	PM			N
3	1A3	AKT3	AGC:Akt:	10000	pXN-HA-Flag	N	PM	C			N
18	1B6	MAST1	AGC:MAST:MAST	56527	pXN-HA-Flag	N	C	C			Y
41	1D5	PRKCZ	AGC:PKC:PKCi	5590	pLX304/CMV/Flag	C	PM	C			N
56	1E8	RPS6KL1	AGC:RSKL:	83694	pcDNA-C-Flag	C	C	C			Y
62	1F2	STK32B	AGC:YANK:	55351	pXN-HA-Flag	N	C	C			Y
66	1F6	ADCK1	Atypical:ABC1:ABC1-B	57143	pXN-HA-Flag	N	MI	MI			Y
67	1F7	ADCK2	Atypical:ABC1:ABC1-C	90956	pXC-Flag	C	MI	PM			N
85	1H1	FASTK	Atypical:FAST:	10922	pLX304/CMV/Flag	C	N	V	PM		N
129	2C9	NIM1K	CAMK:CAMKL:NIM1	167359	pXN-HA-Flag	N	PM	C			N
135	2D3	SIK3	CAMK:CAMKL:QIK	23387	pXN-HA-Flag	N	C	C			Y
137	2D5	CAMKV	CAMK:CAMK-Unique:	79012	pLX304/CMV/Flag	C	PM	C			N
160	2F4	PIM2	CAMK:PIM:	11040	pLX304/CMV/Flag	C	N	C			N
166	2F10	PSKH2	CAMK:PSK:	85481	pXN-HA-Flag	N	C	C			Y
168	2F12	STK40	CAMK:SgK495:	83931	pLX304/CMV/Flag	C	N	C			N
179	2G11	TSSK3	CAMK:TSSK:	81629	pXC-Flag	C	AG	C			N
194	3A2	CDK20	CMGC:CDK:CCRK	23552	pLX304/CMV/Flag	C	C	C			Y
212	3B8	CDK18	CMGC:CDK:PCTAIRE	5129	pXN-HA-Flag	N	C	N	C		Y
215	3B11	CDKL1	CMGC:CDKL:	8814	pcDNA-C-Flag	C	C	C	N		Y
216	3B12	CDKL2	CMGC:CDKL:	8999	pXN-HA-Flag	N	C	C	N		Y
225	3C9	CLK4	CMGC:CLK:	57396	pXN-HA-Flag	N	N	N			Y
230	3D2	DYRK4	CMGC:DYRK:DYRK2	8798	pXN-HA-Flag	N	C	N			N
233	3D5	HIPK3	CMGC:DYRK:HIPK	10114	pXN-HA-Flag	N	N	PM	ER		N
287	3H11	BMP2K	Other:NAK:BIKE	55589	pXN-HA-Flag	N	V	C			N
289	4A1	STK16	Other:NAK:MPSK	8576	pLX304/CMV/Flag	C	GL	C			N
293	4A5	NEK10	Other:NEK:NEK10	152110	pXC-Flag	C	C	C			Y
313	4C1	POMK	Other:Other-Unique:	84197	pLX304/CMV/Flag	C	ER	GL			N
317	4C5	EIF2AK1	Other:PEK:HRI	27102	pXN-HA-Flag	N	C	C			Y
353	4F5	FJX1	PKL:FJ:	24147	pXN-HA-Flag	N	GL	GL			Y
354	4F6	GUCY2C	RGC:RGC:	2984	pXN-HA-Flag	N	C	PM			N
359	4F11	MAP3K15	STE:STE11:ASK	389840	pcDNA-C-Flag	C	C	C			Y
368	4G8	STK39	STE:STE20:FRAY	27347	pXN-HA-Flag	N	C	C			Y
371	4G11	MAP4K3	STE:STE20:KHS	8491	pcDNA-Flag	N	ER	C			N
393	5A9	TAOK3	STE:STE20:TAO	51347	pLX304/CMV/Flag	C	C	C			Y
402	5B6	MAP2K5	STE:STE7:MEK5	5607	pLX304/CMV/Flag	C	C	Ex S			N
507	6C3	ILK	TKL:MLK:ILK	3611	pLX304/CMV/Flag	C	C	N	C	V	Y
513	6C9	MAP3K9	TKL:MLK:MLK	4293	pXN-Myc-His	N	C	C			Y
518	6D2	ARAF	TKL:RAF:RAF	369	pXN-HA-Flag	N	PM	C			N
519	6D3	BRAF	TKL:RAF:RAF	673	pXN-HA-Flag	N	C	C			Y
4	1A4	CIT	AGC:DMPK:CRIK	11113	pcDNA-C-Myc	C	V	C			N
7	1A7	CDC42BPG	AGC:DMPK:GEK	55561	pXN-HA-Flag	N	V	C			N
24	1B12	LATS2	AGC:NDR:LATS	26524	pcDNA3-HA-Lats2	N	V	C			N
26	1C2	STK38L	AGC:NDR:NDR	23012	pcDNA-C-Myc	C	N	C			N
28	1C4	PRKACA	AGC:PKA:	5566	pLX304/CMV/Flag	C	GL	C			N
39	1D3	PRKCH	AGC:PKC:PKCh	5583	pLX304/CMV/Flag	C	MI	C			N
46	1D10	PKN3	AGC:PKN:	29941	pcDNA-C-Flag	C	PM	C			N
52	1E4	RPS6KA2	AGC:RSK:RSKp90 CAMK:RSKb:RSKb	6196	pcDNA-C-Flag	C	PM	C			N
84	1G12	CERT1	Atypical:Col4A3BP:	10087	pLX304/CMV/Flag	C	C	C			Y
102	2A6	TAF1	Atypical:TAF1:	6872	pXN-HA-Flag	N	C	N			N
119	2B11	BRSK1	CAMK:CAMKL:BRSK	84446	pEBG2T-GST-HA	N	PM	C			N
120	2B12	BRSK2	CAMK:CAMKL:BRSK	9024	pLX304/CMV/Flag	C	PM	C			N
136	2D4	SNRK	CAMK:CAMKL:SNRK	54861	pXN-HA-Flag	N	C	C			Y
176	2G8	SPEG	CAMK:Trio: CAMK:Trio:	10290	pXN-HA-Flag	N	C	C			Y
186	2H6	CSNK1G1	CK1:CK1:CK1-G	53944	CSNK1G1-Myc	C	PM	C			N
199	3A7	CDK2	CMGC:CDK:CDK2	1017	pLX304/CMV/Flag	C	C	C			Y
247	3E7	NLK	CMGC:MAPK:nmo	51701	pCMV-NLK-Flag	C	PM	C			N
248	3E8	MAPK11	CMGC:MAPK:p38	5600	pXN-HA-Flag	N	PM	C			N
254	3F2	MOK	CMGC:RCK:MOK	5891	pXN-HA-Flag	N	C	C			Y
260	3F8	NME3	NDK:NDK:	4832	pcDNA-C-Myc	C	MI	MI			Y
270	3G6	BUB1	Other:BUB:	699	pXN-HA-Flag	N	C	N			N
291	4A3	NEK3	Other:NEK:NEK1	4752	pXN-HA-Flag	N	C	C			Y
294	4A6	NEK11	Other:NEK:NEK11	79858	pXN-HA-Flag	N	C	C			Y
349	4F1	FAM198B	PKL:FJ:	51313	pXN-HA-Flag	N	ER	GL			N
370	4G10	MAP4K2	STE:STE20:KHS	5871	pcDNA-C-Myc	C	PM	C			N
384	4H12	PAK4	STE:STE20:PAKB	10298	pLX304/CMV/Flag	C	C	C			Y
385	5A1	PAK6	STE:STE20:PAKB	56924	pXN-HA-Flag	N	PM	C			N
386	5A2	PAK5	STE:STE20:PAKB	57144	pLX304/CMV/Flag	C	V	C			N
388	5A4	STK10	STE:STE20:SLK	6793	pXC-Flag	C	C	C			Y
426	5D6	EPHA2	TK:Eph:	1969	pLX304/CMV/Flag	C	V	PM			N
430	5D10	EPHA6	TK:Eph:	13840	pcDNA-C-Myc	C	GL	PM	C		N
464	5G8	RET	TK:Ret:	5979	pcDNA-C-3XFlag	C	ER	PM			N
465	5G9	ROR1	TK:Ror:	4919	pLX304/CMV/Flag	C	ER	PM			N
468	5G12	ROS1	TK:Sev:	6098	pXN-HA-Flag	N	C	PM			N
469	5H1	FRK	TK:Src:Frk	2444	pLX304/CMV/Flag	C	PM	C			N
474	5H6	BLK	TK:Src:SrcB	640	pLX304/CMV/Flag	C	PM	C			N
485	6A5	TEC	TK:Tec:	7006	pXN-HA-Flag	N	V	C			N
489	6A9	STYK1	TK:TK-Unique:	55359	pLX304/CMV/Flag	C	AG	PM			N
508	6C4	MAP3K12	TKL:MLK:LZK	7786	pcDNA-C-Myc	C	GL	C			N
509	6C5	MAP3K13	TKL:MLK:LZK	9175	pcDNA-C-Myc	C	GL	C			N
512	6C8	MAP3K11	TKL:MLK:MLK	4296	pcDNA-C-Myc	C	MI	C			N
515	6C11	MAP3K20	TKL:MLK:ZAK	51776	pLX304/CMV/Flag	C	N	C			N
533	6E5	ACVR2A	TKL:STKR:STKR2	92	pXN-HA-Flag	N	ER	PM			N
535	6E7	AMHR2	TKL:STKR:STKR2	269	pXC-Flag	C	ER	PM			N

## Sheet: Analysis of new localizations 
#	position	Official Symbol	Classification	Gene ID	Vector	Tag position	KA specific localization	COMPARTMENTS											HPA				Note
								5 STAR 1	5 STAR 2	5 STAR 3	5 STAR 4	5 STAR 5	5 STAR 6	5 STAR 7	4 STAR 1	4 STAR 2	4 STAR 3	4 STAR 4	Main 1	Main 2	Main 3	Evidence
3	1A3	AKT3	AGC:Akt:	10000	pXN-HA-Flag	N	PM	No data											C			Supported	Reported
4	1A4	CIT	AGC:DMPK:CRIK	11113	pcDNA-C-Myc	C	V								C	PM			C			Approved	Reported
7	1A7	CDC42BPG	AGC:DMPK:GEK	55561	pXN-HA-Flag	N	V								PM				C			Supported
18	1B6	MAST1	AGC:MAST:MAST	56527	pXN-HA-Flag	N	C	No data											V			Approved	Reported
24	1B12	LATS2	AGC:NDR:LATS	26524	pcDNA3-HA-Lats2	N	V	N	C	CS									CT	C		Supported	Reported
26	1C2	STK38L	AGC:NDR:NDR	23012	pcDNA-C-Flag	C	N	C	CS	PM									C			Approved	Reported
28	1C4	PRKACA	AGC:PKA:	5566	pLX304/CMV/Flag	C	GL	N	C	PM	CS								C			Approved	Reported
39	1D3	PRKCH	AGC:PKC:PKCh	5583	pLX304/CMV/Flag	C	MI	C	PM						Ex S				C			Approved
41	1D5	PRKCZ	AGC:PKC:PKCi	5590	pLX304/CMV/Flag	C	PM	No data											C			Supported	Reported
46	1D10	PKN3	AGC:PKN:	29941	pcDNA-C-Flag	C	PM								N	GL			V			Approved	Reported
52	1E4	RPS6KA2	AGC:RSK:RSKp90 CAMK:RSKb:RSKb	6196	pcDNA-C-Flag	C	PM	N	C										N			Supported
56	1E8	RPS6KL1	AGC:RSKL:	83694	pcDNA-C-Flag	C	C	No data											N			Approved
62	1F2	STK32B	AGC:YANK:	55351	pXN-HA-Flag	N	C	No data											CS			Approved
66	1F6	ADCK1	Atypical:ABC1:ABC1-B	57143	pXN-HA-Flag	N	MI	No data											N			Approved	Reported
67	1F7	ADCK2	Atypical:ABC1:ABC1-C	90956	pXC-Flag	C	MI	No data											CT	C		Uncertain	Reported
84	1G12	CERT1	Atypical:Col4A3BP:	10087	pLX304/CMV/Flag	C	C	GL							ER				ER			Enhanced	Reported
85	1H1	FASTK	Atypical:FAST:	10922	pLX304/CMV/Flag	C	N	No data											MI			Approved	Reported
102	2A6	TAF1	Atypical:TAF1:	6872	pXN-HA-Flag	N	C								N				N			Enhanced
119	2B11	BRSK1	CAMK:CAMKL:BRSK	84446	pEBG2T-GST-HA	N	PM	C	N						CT				N			Supported	Reported
120	2B12	BRSK2	CAMK:CAMKL:BRSK	9024	pLX304/CMV/Flag	C	PM	C	ER	CT									GL			Approved
128	2C8	MELK	CAMK:CAMKL:MELK	9833	pEBG2T-GST-HA	N	C	PM											No data				Reported
129	2C9	NIM1K	CAMK:CAMKL:NIM1	167359	pXN-HA-Flag	N	PM	No data											C			Approved
135	2D3	SIK3	CAMK:CAMKL:QIK	23387	pXN-HA-Flag	N	C	No data											N			Enhanced	Reported
136	2D4	SNRK	CAMK:CAMKL:SNRK	54861	pXN-HA-Flag	N	C	N											V	PM		Approved	Reported
137	2D5	CAMKV	CAMK:CAMK-Unique:	79012	pLX304/CMV/Flag	C	PM	No data											N			Approved	Reported
160	2F4	PIM2	CAMK:PIM:	11040	pLX304/CMV/Flag	C	N	No data											C			Approved	Reported
166	2F10	PSKH2	CAMK:PSK:	85481	pXN-HA-Flag	N	C	No data											N			Approved
168	2F12	STK40	CAMK:SgK495:	83931	pLX304/CMV/Flag	C	N	No data											C			Supported	Reported
176	2G8	SPEG	CAMK:Trio: CAMK:Trio:	10290	pXN-HA-Flag	N	C	N											V			Approved
179	2G11	TSSK3	CAMK:TSSK:	81629	pXC-Flag	C	AG	No data											N			Approved
181	2H1	TSSK6	CAMK:TSSK:	83983	pXN-HA-Flag	N	C								N				No data				Reported
186	2H6	CSNK1G1	CK1:CK1:CK1-G	53944	CSNK1G1-Myc	C	PM	C											C			Supported	Reported
188	2H8	CSNK1G3	CK1:CK1:CK1-G	1456	pcDNA-C-Myc	C	PM	C											No data
194	3A2	CDK20	CMGC:CDK:CCRK	23552	pLX304/CMV/Flag	C	C	No data											N			Supported	Reported
199	3A7	CDK2	CMGC:CDK:CDK2	1017	pLX304/CMV/Flag	C	C	N	CT	V									N			Enhanced	Reported
212	3B8	CDK18	CMGC:CDK:PCTAIRE	5129	pXN-HA-Flag	N	C	No data											CS			Approved	Reported
215	3B11	CDKL1	CMGC:CDKL:	8814	pcDNA-C-Flag	C	C	No data											N	V		Enhanced	Reported
216	3B12	CDKL2	CMGC:CDKL:	8999	pXN-HA-Flag	N	C	No data											N	CT		Supported	Reported
225	3C9	CLK4	CMGC:CLK:	57396	pXN-HA-Flag	N	N	No data											CS			Approved	Reported
230	3D2	DYRK4	CMGC:DYRK:DYRK2	8798	pXN-HA-Flag	N	C	No data											V			Enhanced	Reported
233	3D5	HIPK3	CMGC:DYRK:HIPK	10114	pXN-HA-Flag	N	N	No data											C			Supported	Reported
247	3E7	NLK	CMGC:MAPK:nmo	51701	pCMV-NLK-Flag	C	PM								N	C			N			Supported
248	3E8	MAPK11	CMGC:MAPK:p38	5600	pXN-HA-Flag	N	PM								N	C			MI			Approved
254	3F2	MOK	CMGC:RCK:MOK	5891	pXN-HA-Flag	N	C	N											ER			Supported	Reported
260	3F8	NME3	NDK:NDK:	4832	pcDNA-C-Myc	C	MI								C				N			Approved	Reported
269	3G5	AURKC	Other:Aur:	6795	pLX304/CMV/Flag	C	C	N	CS										No data
270	3G6	BUB1	Other:BUB:	699	pXN-HA-Flag	N	C	N											N			Supported
285	3H9	MOS	Other:MOS:	4342	pXN-HA-Flag	N	N								C				No data				Reported
287	3H11	BMP2K	Other:NAK:BIKE	55589	pXN-HA-Flag	N	V	No data											N			Supported	Reported
289	4A1	STK16	Other:NAK:MPSK	8576	pLX304/CMV/Flag	C	GL	No data											C			Approved	Reported
291	4A3	NEK3	Other:NEK:NEK1	4752	pXN-HA-Flag	N	C	N											CS			Approved	Reported
293	4A5	NEK10	Other:NEK:NEK10	152110	pXC-Flag	C	C	No data											V			Approved
294	4A6	NEK11	Other:NEK:NEK11	79858	pXN-HA-Flag	N	C	N											N			Supported	Reported
313	4C1	POMK	Other:Other-Unique:	84197	pLX304/CMV/Flag	C	ER	No data											N			Approved
315	4C3	PAN3	Other:PAN3:	255967	pT7-EGFP-C1-HsPAN3	N	V								C				No data				Reported
317	4C5	EIF2AK1	Other:PEK:HRI	27102	pXN-HA-Flag	N	C	No data											N			Supported	Reported
322	4C10	PLK3	Other:PLK:PLK2	1263	pcDNA-C-Myc	C	PM	CT	C	N	GL								No data				Reported
347	4E11	WNK4	Other:WNK:	65266	pcDNA-C-Myc	C	AG								PM				No data
349	4F1	FAM198B	PKL:FJ:	51313	pXN-HA-Flag	N	ER								GL				N	GL		Approved
350	4F2	FAM20A	PKL:FJ:	54757	pcDNA-C-Flag	C	PM	Ex S							ER				No data				Reported
353	4F5	FJX1	PKL:FJ:	24147	pXN-HA-Flag	N	GL	No data											V			Approved	Reported
354	4F6	GUCY2C	RGC:RGC:	2984	pXN-HA-Flag	N	C	No data											V			Uncertain
356	4F8	GUCY2F	RGC:RGC:	2986	pcDNA-C-Myc	C	ER								N				No data
358	4F10	NPR2	RGC:RGC:	4882	pcDNA-C-Flag	C	ER	PM											No data
359	4F11	MAP3K15	STE:STE11:ASK	389840	pcDNA-C-Flag	C	C	No data											V			Approved	Reported
368	4G8	STK39	STE:STE20:FRAY	27347	pXN-HA-Flag	N	C	No data											N			Supported	Reported
370	4G10	MAP4K2	STE:STE20:KHS	5871	pcDNA-C-Myc	C	PM								GL				V			Approved	Reported
371	4G11	MAP4K3	STE:STE20:KHS	8491	pcDNA-Flag	N	ER	No data											CT			Approved
384	4H12	PAK4	STE:STE20:PAKB	10298	pLX304/CMV/Flag	C	C								GL	PM			PM			Supported	Reported
385	5A1	PAK6	STE:STE20:PAKB	56924	pXN-HA-Flag	N	PM	N	C										N			Supported	Reported
386	5A2	PAK5	STE:STE20:PAKB	57144	pLX304/CMV/Flag	C	V	N	C	MI									N			Approved	Reported
388	5A4	STK10	STE:STE20:SLK	6793	pXC-Flag	C	C	PM							Ex S				N	PM		Approved	Reported
393	5A9	TAOK3	STE:STE20:TAO	51347	pLX304/CMV/Flag	C	C	No data											MI			Uncertain
402	5B6	MAP2K5	STE:STE7:MEK5	5607	pLX304/CMV/Flag	C	C	No data											N	CS		Approved	Reported
414	5C6	TYRO3	TK:Axl:	7301	pLX304/CMV/Flag	C	V	PM							N	ER			No data
415	5C7	PTK7	TK:CCK4:	5754	pcDNA-C-Myc	C	ER	PM											No data
423	5D3	ERBB4	TK:EGFR:	2066	pLX304/CMV/Flag	C	GL	N	MI	PM					C				No data
425	5D5	EPHA10	TK:Eph:	284656	pcDNA-C-Myc	C	GL	PM											No data
426	5D6	EPHA2	TK:Eph:	1969	pLX304/CMV/Flag	C	V	PM											PM			Supported
430	5D10	EPHA6	TK:Eph:	13840	pcDNA-C-Myc	C	GL								PM				N			Enhanced
432	5D12	EPHA8	TK:Eph:	2046	pLX304/CMV/Flag	C	ER								PM				No data
458	5G2	MUSK	TK:Musk:	4593	pXC-Flag	C	V	PM											No data
464	5G8	RET	TK:Ret:	5979	pcDNA-C-3XFlag	C	ER	PM	V										GL	C		Approved
465	5G9	ROR1	TK:Ror:	4919	pLX304/CMV/Flag	C	ER	PM							C				CS			Approved
468	5G12	ROS1	TK:Sev:	6098	pXN-HA-Flag	N	C	PM											V			Approved
469	5H1	FRK	TK:Src:Frk	2444	pLX304/CMV/Flag	C	PM	Ex S											N			Supported
474	5H6	BLK	TK:Src:SrcB	640	pLX304/CMV/Flag	C	PM								C				N			Approved	Reported
484	6A4	ITK	TK:Tec:	3702	pXN-HA-Flag	N	PM								N	C			No data				Reported
485	6A5	TEC	TK:Tec:	7006	pXN-HA-Flag	N	V	C	CS	PM									PM			Supported
489	6A9	STYK1	TK:TK-Unique:	55359	pLX304/CMV/Flag	C	AG								PM				PM			Approved
507	6C3	ILK	TKL:MLK:ILK	3611	pLX304/CMV/Flag	C	C	No data											PM			Supported	Reported
508	6C4	MAP3K12	TKL:MLK:LZK	7786	pcDNA-C-Myc	C	GL								C	PM			N	PM		Approved
509	6C5	MAP3K13	TKL:MLK:LZK	9175	pcDNA-C-Myc	C	GL	PM											CT			Approved
512	6C8	MAP3K11	TKL:MLK:MLK	4296	pcDNA-C-Myc	C	MI	CT	CS						PM				CT	C		Supported	Reported
513	6C9	MAP3K9	TKL:MLK:MLK	4293	pXN-Myc-His	N	C	No data											N			Approved	Reported
515	6C11	MAP3K20	TKL:MLK:ZAK	51776	pLX304/CMV/Flag	C	N								C				C			Supported	Reported
518	6D2	ARAF	TKL:RAF:RAF	369	pXN-HA-Flag	N	PM	No data											N			Approved	Reported
519	6D3	BRAF	TKL:RAF:RAF	673	pXN-HA-Flag	N	C	No data											V			Approved	Reported
521	6D5	ANKK1	TKL:RIPK:	255239	pXN-HA-Flag	N	C	N											No data
525	6D9	RIPK4	TKL:RIPK:	54101	pXN-HA-Flag	N	V								C				No data				Reported
531	6E3	BMPR1B	TKL:STKR:STKR1	658	pXN-HA-Flag	N	ER	PM											No data
533	6E5	ACVR2A	TKL:STKR:STKR2	92	pXN-HA-Flag	N	ER	PM							C				C			Approved
535	6E7	AMHR2	TKL:STKR:STKR2	269	pXC-Flag	C	ER	PM							C				V			Supported
